# Supplementary material for: The CgHaa1-Regulon Mediates Response and Tolerance to Acetic Acid Stress in the Human Pathogen Candida glabrata
Source: PubMed Central journal article supplement (PMC5217100; doi:10.1534/g3.116.034660), 2016-11-04
Supplement: 1FigureS1.pdf [file 1FigureS1.pdf]

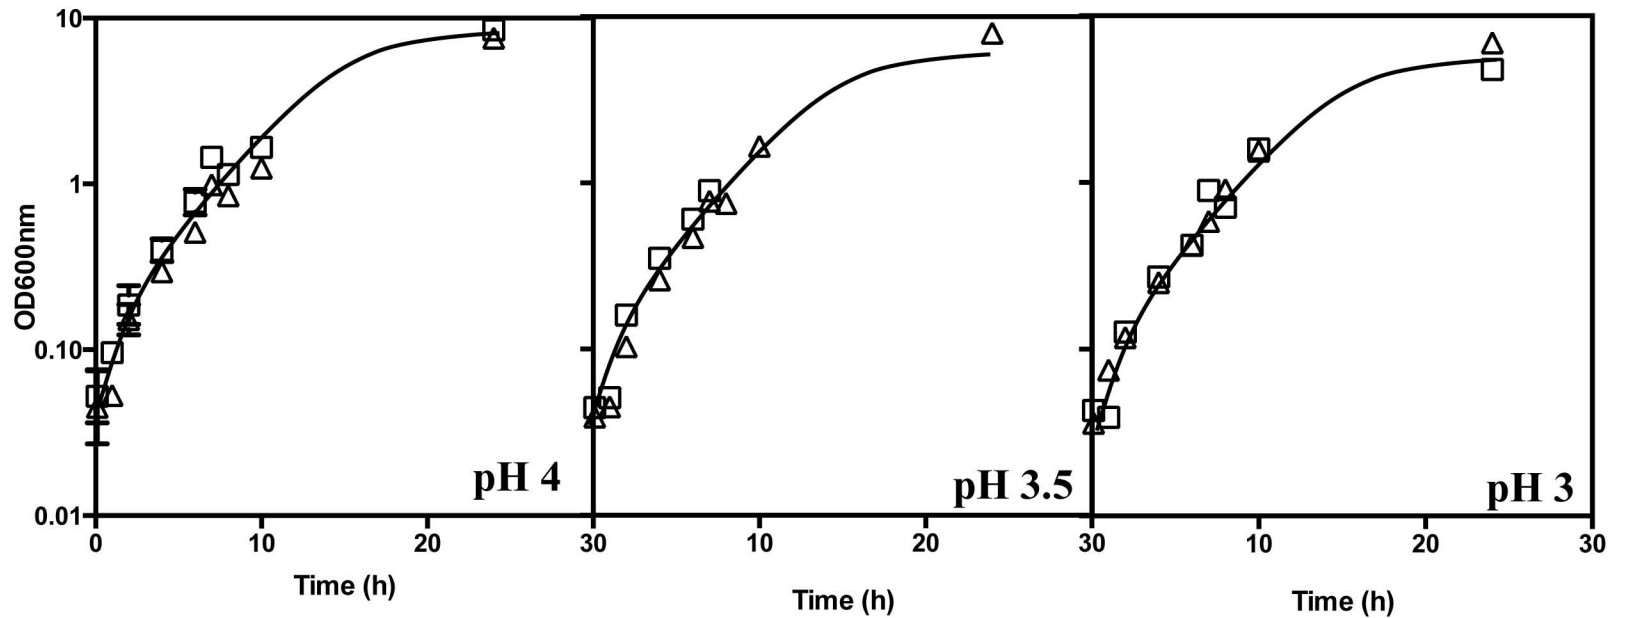

□ KUE100

△ *ΔCgha1*

Figure S1
