# Supplementary material for: The CgHaa1-Regulon Mediates Response and Tolerance to Acetic Acid Stress in the Human Pathogen Candida glabrata
Source: PubMed Central journal article supplement (PMC5217100; doi:10.1534/g3.116.034660), 2016-11-04
Supplement: 1FigureS4.pdf [file 1FigureS4.pdf]

CARBON METABOLISM

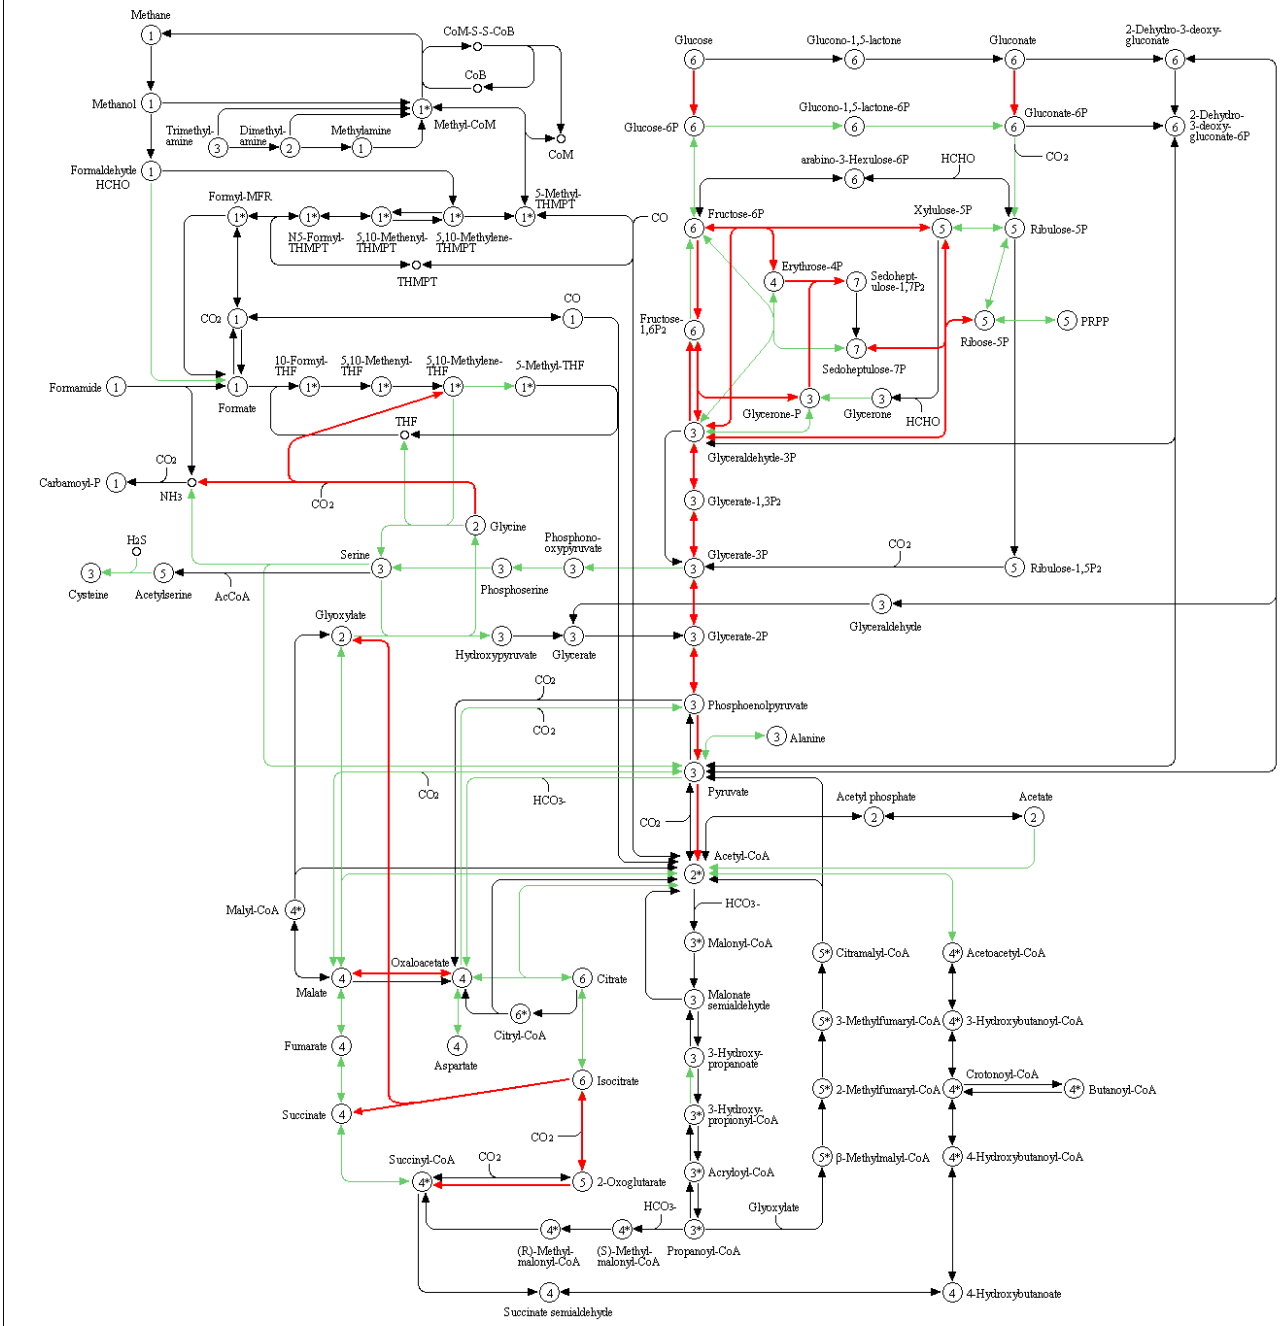

01200 3/4/15  
© Kanehisa Laboratories

Figure S4
