# Supplementary material for: The CgHaa1-Regulon Mediates Response and Tolerance to Acetic Acid Stress in the Human Pathogen Candida glabrata
Source: PubMed Central journal article supplement (PMC5217100; doi:10.1534/g3.116.034660), 2016-11-04
Supplement: 1FigureS5.pdf [file 1FigureS5.pdf]

BIOSYNTHESIS OF AMINO ACIDS

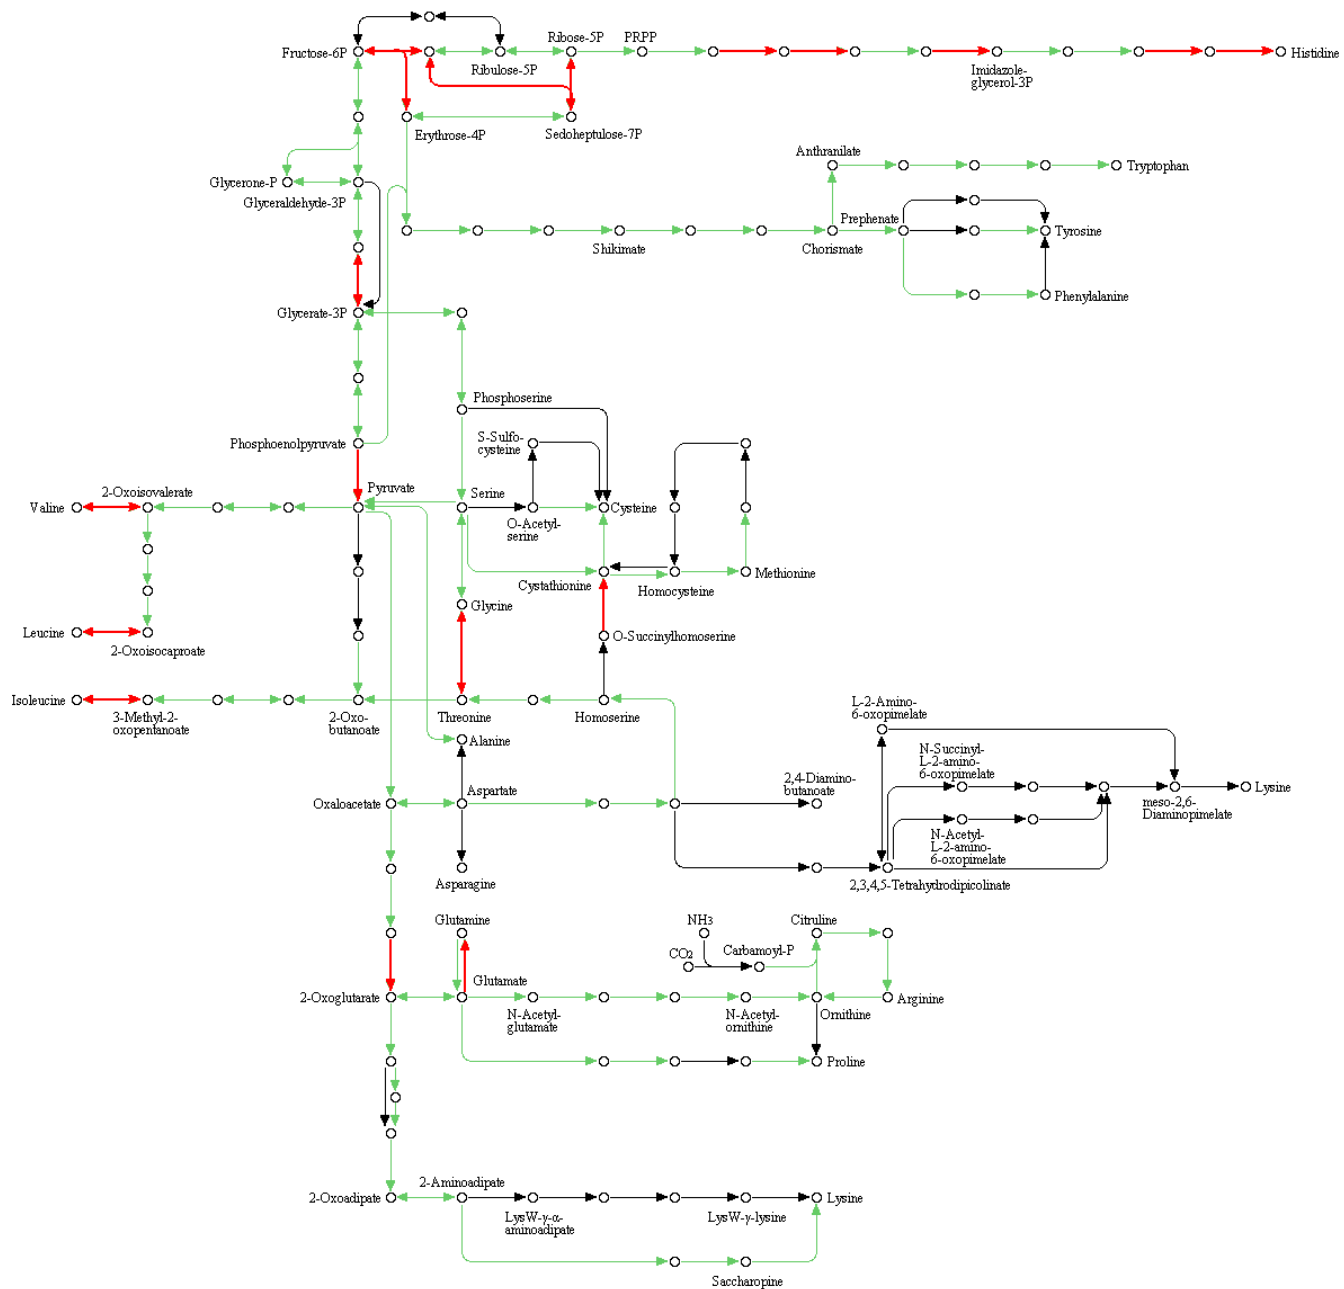

Figure S5
