# Supplementary material for: The CgHaa1-Regulon Mediates Response and Tolerance to Acetic Acid Stress in the Human Pathogen Candida glabrata
Source: PubMed Central journal article supplement (PMC5217100; doi:10.1534/g3.116.034660), 2016-11-04
Supplement: 1TableS1.pdf [file 1TableS1.pdf]

**Supplementary Table S1** – List of the genes found to be up- or down- regulated in response to acetic acid (30 mM, at pH 4.0) in *C. glabrata* KUE100 cells. Genes whose expression increased or decreased (above a 2-fold threshold level) in acetic acid (AC)-challenged cells, in comparison with unstressed cells (CTRL), were selected as described in materials and methods and are here listed. The biological function indicated was based on the information available at Candida Genome Database and/or in the information available for the *S. cerevisiae* orthologue

| UP-REGULATED GENES |                |                                     |          |                                 |                                                                                                                                                                                                                                                                                                                                                           |
|--------------------|----------------|-------------------------------------|----------|---------------------------------|-----------------------------------------------------------------------------------------------------------------------------------------------------------------------------------------------------------------------------------------------------------------------------------------------------------------------------------------------------------|
| ORF                | Gene name      | log <sub>2</sub> FC (wt AC/wt CTRL) | p_value  | <i>S. cerevisiae</i> orthologue | Function                                                                                                                                                                                                                                                                                                                                                  |
| CAGLOG05632g       |                | 6,95                                | 1,20E-07 | <i>YDL218W</i>                  | Putative protein of unknown function; <i>YDL218W</i> transcription is regulated by <i>Azf1p</i> and induced by starvation and aerobic conditions; expression also induced in cells treated with the mycotoxin patulin                                                                                                                                     |
| CAGLO10010g        |                | 6,82                                | 1,18E-08 | <i>BTN2</i>                     | v-SNARE binding protein that facilitates specific protein retrieval from a late endosome to the Golgi; modulates arginine uptake, possible role in mediating pH homeostasis between the vacuole and plasma membrane H(+)-ATPase                                                                                                                           |
| CAGLOM01166g       |                | 6,44                                | 2,09E-06 | <i>THI4</i>                     | Thiazole synthase, abundant protein involved in the formation of the thiazole moiety of thiamine during thiamine biosynthesis; acts more as a co-substrate rather than an enzyme by providing the sulphur source for thiazole formation; undergoes a single turnover only; required for mitochondrial genome stability in response to DNA damaging agents |
| CAGLOF08261g       |                | 6,11                                | 1,01E-07 | <i>ENO1</i>                     | Enolase 1, a phosphopyruvate hydratase that catalyzes the conversion of 2-phosphoglycerate to phosphoenolpyruvate during glycolysis and the reverse reaction during gluconeogenesis; expression is repressed in response to glucose                                                                                                                       |
| CAGLOG03883g       |                | 6,10                                | 1,40E-08 | <i>HSP104</i>                   | Disaggregase; Heat shock protein that cooperates with <i>Ydj1p</i> ( <i>Hsp40</i> ) and <i>Ssa1p</i> ( <i>Hsp70</i> ) to refold and reactivate previously denatured, aggregated proteins; responsive to stresses including: heat, ethanol, and sodium arsenite; involved in [PSI <sup>+</sup> ] propagation                                               |
| CAGLOG03289g       | <i>CgSSA3</i>  | 6,10                                | 5,22E-07 | <i>SSA4</i>                     | Heat shock protein that is highly induced upon stress; plays a role in SRP-dependent cotranslational protein-membrane targeting and translocation; member of the HSP70 family; cytoplasmic protein that concentrates in nuclei upon starvation                                                                                                            |
| CAGLOJ00451g       |                | 5,66                                | 4,15E-07 | -                               | Putative glyceraldehyde-3-phosphate dehydrogenase                                                                                                                                                                                                                                                                                                         |
| CAGLOC04323g       |                | 5,33                                | 8,54E-07 | <i>NTH2</i>                     | Putative neutral trehalase, required for thermotolerance and may mediate resistance to other cellular stresses                                                                                                                                                                                                                                            |
| CAGLOM11902g       |                | 5,08                                | 3,85E-08 | <i>FUN19</i>                    | Non-essential protein of unknown function; expression induced in response to heat stress                                                                                                                                                                                                                                                                  |
| CAGLOM08822g       | <i>CgHSP78</i> | 5,06                                | 9,72E-08 | <i>HSP78</i>                    | Oligomeric mitochondrial matrix chaperone that cooperates with <i>Ssc1p</i> in mitochondrial thermotolerance after heat shock; able to prevent the aggregation of misfolded proteins as well as resolubilize protein aggregates                                                                                                                           |
| CAGLOE00803g       |                | 4,82                                | 4,94E-08 | <i>HSP42</i>                    | Small heat shock protein (sHSP) with chaperone activity; forms barrel-shaped oligomers that suppress unfolded protein aggregation; involved in cytoskeleton reorganization after heat shock                                                                                                                                                               |
| CAGLOI07249g       |                | 4,71                                | 1,01E-05 | <i>BAG7</i>                     | Rho GTPase activating protein (RhoGAP), stimulates the intrinsic GTPase activity of <i>Rho1p</i> , which plays a role in actin cytoskeleton organization and control of cell wall synthesis; structurally and functionally related to <i>Sac7p</i>                                                                                                        |
| CAGLOH03707g       |                | 4,64                                | 1,89E-07 | <i>SIS1</i>                     | Type II HSP40 co-chaperone that interacts with the HSP70 protein <i>Ssa1p</i> ; not functionally redundant with <i>Ydj1p</i> due to due to substrate specificity; shares similarity with bacterial <i>DnaJ</i> proteins                                                                                                                                   |
| CAGLOE01353g       |                | 4,55                                | 2,67E-07 | <i>ZRT2</i>                     | Low-affinity zinc transporter of the plasma membrane; transcription is induced under low-zinc conditions by the <i>Zap1p</i> transcription factor                                                                                                                                                                                                         |
| CAGLOG08866g       |                | 4,38                                | 1,42E-07 | <i>FKH1</i>                     | Forkhead family transcription factor with a minor role in the expression of G2/M phase genes; negatively regulates transcriptional elongation; positive role in chromatin silencing at HML and HMR; regulates donor preference during switching                                                                                                           |
| CAGLOK07337g       |                | 4,37                                | 1,63E-06 | <i>HSP30</i>                    | Has domain(s) with predicted ion channel activity, role in ion transport and membrane localization                                                                                                                                                                                                                                                        |
| CAGLOC02321g       | <i>CgPHM8</i>  | 4,25                                | 1,45E-07 | <i>PHM8</i>                     | Lysophosphatidic acid (LPA) phosphatase involved in LPA hydrolysis in response to phosphate starvation; phosphatase activity is soluble and Mg <sup>2+</sup> dependent; expression is induced by low phosphate levels and by inactivation of <i>Pho85p</i>                                                                                                |
| CAGLOH02585g       |                | 4,19                                | 1,35E-06 | <i>GAD1</i>                     | Glutamate decarboxylase, converts glutamate into gamma-aminobutyric acid (GABA) during glutamate catabolism; involved in response to oxidative stress                                                                                                                                                                                                     |
| CAGLOH10076g       |                | 4,12                                | 1,50E-06 | <i>YRO2</i>                     | Protein of unknown function with similarity to archaeal rhodopsins; the authentic, non-tagged protein is detected in a phosphorylated state in highly purified mitochondria in high-throughput studies; transcriptionally regulated by <i>Haa1p</i>                                                                                                       |
| CAGLOK10164g       |                | 4,08                                | 1,73E-05 | <i>SED1</i>                     | Major stress-induced structural GPI-cell wall glycoprotein in stationary-phase cells, associates with translating ribosomes, possible role in mitochondrial genome maintenance; ORF contains two distinct variable minisatellites                                                                                                                         |
| CAGLOI09724g       |                | 4,07                                | 6,09E-07 | -                               | Has domain(s) with predicted role in transmembrane transport and integral component of membrane localization                                                                                                                                                                                                                                              |
| CAGLOF04631g       |                | 4,03                                | 6,56E-06 | <i>MOH1</i>                     | Protein of unknown function, has homology to kinase <i>Snf7p</i> ; not required for growth on nonfermentable carbon sources; essential for survival in stationary phase                                                                                                                                                                                   |
| CAGLOI10384g       | <i>CgTPO3</i>  | 3,98                                | 2,68E-06 | <i>TPO2</i>                     | Polyamine transport protein specific for spermine; localizes to the plasma membrane; transcription of <i>TPO2</i> is regulated by <i>Haa1p</i> ; member of the major facilitator superfamily                                                                                                                                                              |
| CAGLOJ06050g       |                | 3,97                                | 3,26E-06 | <i>YGP1</i>                     | Cell wall-related secretory glycoprotein; induced by nutrient deprivation-associated growth arrest and upon entry into stationary phase; may be involved in adaptation prior to stationary phase entry; has similarity to <i>Sps100p</i>                                                                                                                  |
| CAGLOH00704g       |                | 3,95                                | 5,98E-07 | <i>ICY2</i>                     | Protein of unknown function; mobilized into polysomes upon a shift from a fermentable to nonfermentable carbon source; potential <i>Cdc28p</i> substrate                                                                                                                                                                                                  |
| CAGLOG08624g       | <i>CgQDR2</i>  | 3,92                                | 2,06E-06 | <i>QDR1</i>                     | Multidrug transporter of the major facilitator superfamily, required for resistance to quinidine, ketoconazole, fluconazole, and barban                                                                                                                                                                                                                   |
| CAGLOF04521g       |                | 3,84                                | 8,29E-07 | <i>ECM13</i>                    | Non-essential protein of unknown function; induced by treatment with 8-methoxypsoralen and UVA irradiation                                                                                                                                                                                                                                                |
| CAGLOG06182g       |                | 3,72                                | 2,98E-06 | <i>YHR131C</i>                  | Putative protein of unknown function; GFP-fusion protein localizes to the cytoplasm; overexpression causes cell cycle delay or arrest; contains a PH domain and binds phosphatidylinositols and other lipids in a large-scale study                                                                                                                       |
| CAGLOL07722g       | <i>CgPGK1</i>  | 3,69                                | 2,65E-05 | <i>PGK1</i>                     | 3-phosphoglycerate kinase, catalyzes transfer of high-energy phosphoryl groups from the acyl phosphate of 1,3-bisphosphoglycerate to ADP to produce ATP; key enzyme in glycolysis and gluconeogenesis                                                                                                                                                     |
| CAGLOA01804g       | <i>CgHXT1</i>  | 3,65                                | 2,98E-06 | <i>HXT1</i>                     | Low-affinity glucose transporter of the major facilitator superfamily, expression is induced by <i>Hxk2p</i> in the presence of glucose and repressed by <i>Rgt1p</i> when glucose is limiting                                                                                                                                                            |

|              |                |      |          |                |                                                                                                                                                                                                                                                                                                                                                                                                                                                                            |
|--------------|----------------|------|----------|----------------|----------------------------------------------------------------------------------------------------------------------------------------------------------------------------------------------------------------------------------------------------------------------------------------------------------------------------------------------------------------------------------------------------------------------------------------------------------------------------|
| CAGL0H04279g | <i>MT-IIB</i>  | 3,65 | 2,67E-05 | -              | Copper-binding metallothionein, involved in sequestration of metal ions                                                                                                                                                                                                                                                                                                                                                                                                    |
| CAGL0F04895g |                | 3,61 | 4,57E-06 | <i>GPH1</i>    | Non-essential glycogen phosphorylase required for the mobilization of glycogen, activity is regulated by cyclic AMP-mediated phosphorylation, expression is regulated by stress-response elements and by the HOG MAP kinase pathway                                                                                                                                                                                                                                        |
| CAGL0K12254g |                | 3,60 | 1,98E-06 | <i>VID24</i>   | Peripheral membrane protein located at Vid (vacuole import and degradation) vesicles; regulates fructose-1,6-bisphosphatase (FBPase) targeting to the vacuole; promotes proteasome-dependent catabolite degradation of FBPase                                                                                                                                                                                                                                              |
| CAGL0K04301g |                | 3,47 | 1,20E-05 | <i>FMP48</i>   | Putative protein of unknown function; the authentic, non-tagged protein is detected in highly purified mitochondria in high-throughput studies; induced by treatment with 8-methoxy psoralen and UVA irradiation                                                                                                                                                                                                                                                           |
| CAGL0B00616g |                | 3,46 | 3,39E-05 | <i>SPS22</i>   | Protein of unknown function, redundant with Sps2p for the organization of the beta-glucan layer of the spore wall                                                                                                                                                                                                                                                                                                                                                          |
| CAGL0E06358g | <i>CgGPM1</i>  | 3,46 | 1,18E-06 | <i>GPM1</i>    | Tetrameric phosphoglycerate mutase, mediates the conversion of 3-phosphoglycerate to 2-phosphoglycerate during glycolysis and the reverse reaction during gluconeogenesis                                                                                                                                                                                                                                                                                                  |
| CAGL0K03421g |                | 3,39 | 2,14E-05 | <i>PGM2</i>    | Phosphoglucomutase, catalyzes the conversion from glucose-1-phosphate to glucose-6-phosphate, which is a key step in hexose metabolism; functions as the acceptor for a Glc-phosphotransferase                                                                                                                                                                                                                                                                             |
| CAGL0L08008g |                | 3,39 | 1,40E-04 | <i>PMP1</i>    | Small single-membrane span proteolipid that functions as a regulatory subunit of the plasma membrane H(+)-ATPase Pma1p, forms unique helix and positively charged cytoplasmic domain that is able to specifically segregate phosphatidylserines                                                                                                                                                                                                                            |
| CAGL0H02101g |                | 3,31 | 8,50E-05 | <i>RTC3</i>    | Protein of unknown function involved in RNA metabolism; has structural similarity to SBDS, the human protein mutated in Shwachman-Diamond Syndrome (the yeast SBDS ortholog = SDO1); null mutation suppresses cdc13-1 temperature sensitivity                                                                                                                                                                                                                              |
| CAGL0J10296g |                | 3,30 | 1,21E-06 | <i>API1</i>    | Putative chaperone of the HSP40 (DNAJ) family; overexpression interferes with propagation of the [Psi+] prion; the authentic, non-tagged protein is detected in highly purified mitochondria in high-throughput studies                                                                                                                                                                                                                                                    |
| CAGL0G05269g |                | 3,27 | 1,70E-05 | <i>FMP16</i>   | Putative protein of unknown function; proposed to be involved in responding to conditions of stress; the authentic, non-tagged protein is detected in highly purified mitochondria in high-throughput studies                                                                                                                                                                                                                                                              |
| CAGL0I09702g |                | 3,24 | 2,15E-06 | <i>MCH5</i>    | Plasma membrane riboflavin transporter; facilitates the uptake of vitamin B2; required for FAD-dependent processes; sequence similarity to mammalian monocarboxylate permeases, however mutants are not deficient in monocarboxylate transport                                                                                                                                                                                                                             |
| CAGL0G09383g | <i>CgTDH3</i>  | 3,23 | 5,64E-06 | <i>TDH3</i>    | Glyceraldehyde-3-phosphate dehydrogenase, isozyme 3, involved in glycolysis and gluconeogenesis; tetramer that catalyzes the reaction of glyceraldehyde-3-phosphate to 1,3 bis-phosphoglycerate; detected in the cytoplasm and cell wall                                                                                                                                                                                                                                   |
| CAGL0E05148g |                | 3,23 | 3,68E-06 | <i>AMS1</i>    | Vacuolar alpha mannosidase, involved in free oligosaccharide (FOS) degradation; delivered to the vacuole in a novel pathway separate from the secretory pathway                                                                                                                                                                                                                                                                                                            |
| CAGL0F08745g |                | 3,22 | 7,88E-05 | <i>STF2</i>    | Protein involved in resistance to desiccation stress; Stf2p exhibits antioxidant properties, and its overexpression prevents ROS accumulation and apoptosis; binds to the F0 sector of mitochondrial F1F0 ATPase in vitro and is proposed to modulate the inhibitory action of Inh1p and Stf1p                                                                                                                                                                             |
| CAGL0M02167g |                | 3,22 | 2,99E-06 | <i>PRM4</i>    | Pheromone-regulated protein proposed to be involved in mating; predicted to have 1 transmembrane segment; transcriptionally regulated by Ste12p during mating and by Cat8p during the diauxic shift                                                                                                                                                                                                                                                                        |
| CAGL0G02057g |                | 3,19 | 2,48E-05 | <i>YKR075C</i> | Protein of unknown function; similar to YOR062Cp and Reg1p; expression regulated by glucose and Rgt1p; GFP-fusion protein is induced in response to the DNA-damaging agent MMS                                                                                                                                                                                                                                                                                             |
| CAGL0H04851g |                | 3,18 | 4,78E-06 | <i>PPZ1</i>    | Serine/threonine protein phosphatase Z, isoform of Pp22p; involved in regulation of potassium transport, which affects osmotic stability, cell cycle progression, and halotolerance                                                                                                                                                                                                                                                                                        |
| CAGL0J01595g | <i>CgGLM6</i>  | 3,18 | 4,74E-06 | <i>YPR015C</i> | Putative protein of unknown function; overexpression causes a cell cycle delay or arrest                                                                                                                                                                                                                                                                                                                                                                                   |
| CAGL0A03102g | <i>CgARO10</i> | 3,17 | 2,47E-06 | <i>ARO10</i>   | Phenylpyruvate decarboxylase, catalyzes decarboxylation of phenylpyruvate to phenylacetaldehyde, which is the first specific step in the Ehrlich pathway                                                                                                                                                                                                                                                                                                                   |
| CAGL0A02002g |                | 3,16 | 7,20E-06 | <i>YOL024W</i> | Putative protein of unknown function; predicted to have thiol-disulfide oxidoreductase active site                                                                                                                                                                                                                                                                                                                                                                         |
| CAGL0H00418g |                | 3,16 | 1,31E-05 | -              | Unknown                                                                                                                                                                                                                                                                                                                                                                                                                                                                    |
| CAGL0I00418g |                | 3,15 | 4,34E-05 | <i>OLE1</i>    | Delta(9) fatty acid desaturase, required for monounsaturated fatty acid synthesis and for normal distribution of mitochondria                                                                                                                                                                                                                                                                                                                                              |
| CAGL0K04719g |                | 3,15 | 2,17E-06 | <i>YNL208W</i> | Protein of unknown function; may interact with ribosomes, based on co-purification experiments; authentic, non-tagged protein is detected in purified mitochondria in high-throughput studies; potential orthologs found in other fungi                                                                                                                                                                                                                                    |
| CAGL0G03795g | <i>CgSSA1</i>  | 3,13 | 4,17E-05 | <i>SSA2</i>    | ATP binding protein involved in protein folding and vacuolar import of proteins; member of heat shock protein 70 (HSP70) family; associated with the chaperonin-containing T-complex; present in the cytoplasm, vacuolar membrane and cell wall; 98% identical with Ssa1p, but subtle differences between the two proteins provide functional specificity with respect to propagation of yeast [URE3] prions and vacuolar-mediated degradations of gluconeogenesis enzymes |
| CAGL0I05934g |                | 3,12 | 2,01E-06 | <i>YJL144W</i> | Cytoplasmic hydrophilin essential in desiccation-rehydration process; expression induced by osmotic stress, starvation and during stationary phase; GFP-fusion protein is induced by the DNA-damaging agent MMS                                                                                                                                                                                                                                                            |
| CAGL0K07590g | <i>CgMYO3</i>  | 3,11 | 3,72E-06 | <i>MYO3</i>    | One of two type I myosins; localizes to actin cortical patches; deletion of MYO3 has little effect on growth, but myo3 myo5 double deletion causes severe defects in growth and actin cytoskeleton organization                                                                                                                                                                                                                                                            |
| CAGL0E05566g |                | 3,11 | 1,28E-05 | <i>TYE7</i>    | Serine-rich protein that contains a basic-helix-loop-helix (bHLH) DNA binding motif; binds E-boxes of glycolytic genes and contributes to their activation; may function as a transcriptional activator in Ty1-mediated gene expression                                                                                                                                                                                                                                    |
| CAGL0F01111g |                | 3,09 | 1,64E-06 | <i>OPI10</i>   | Protein with a possible role in phospholipid biosynthesis, based on inositol-excreting phenotype of the null mutant and its suppression by exogenous choline                                                                                                                                                                                                                                                                                                               |
| CAGL0I05148g | <i>CgDLD1</i>  | 3,07 | 5,89E-05 | <i>DLD1</i>    | D-lactate dehydrogenase, oxidizes D-lactate to pyruvate, transcription is heme-dependent, repressed by glucose, and derepressed in ethanol or lactate; located in the mitochondrial inner membrane                                                                                                                                                                                                                                                                         |
| CAGL0G02563g |                | 3,06 | 3,38E-05 | NA             | NA                                                                                                                                                                                                                                                                                                                                                                                                                                                                         |
| CAGL0G03179g |                | 3,06 | 2,72E-06 | <i>ASK10</i>   | Component of RNA polymerase II holoenzyme, phosphorylated in response to oxidative stress; has a role in destruction of Ssn8p; proposed to function in activation of the glycerol channel Fps1p; paralogous to Rgc1p                                                                                                                                                                                                                                                       |
| CAGL0I02486g | <i>CgENO1</i>  | 3,06 | 2,02E-05 | <i>ENO2</i>    | Enolase II, a phosphopyruvate hydratase that catalyzes the conversion of 2-phosphoglycerate to phosphoenolpyruvate during glycolysis and the reverse reaction during gluconeogenesis; expression is induced in response to glucose                                                                                                                                                                                                                                         |
| CAGL0K03685g |                | 3,05 | 5,72E-05 | <i>PKR1</i>    | V-ATPase assembly factor, functions with other V-ATPase assembly factors in the ER to efficiently assemble the V-ATPase membrane sector (V0)                                                                                                                                                                                                                                                                                                                               |

|              |                |      |          |                |                                                                                                                                                                                                                                                                                     |
|--------------|----------------|------|----------|----------------|-------------------------------------------------------------------------------------------------------------------------------------------------------------------------------------------------------------------------------------------------------------------------------------|
| CAGL0J04466g |                | 3,04 | 1,97E-06 | <i>PUN1</i>    | Plasma membrane protein with a role in cell wall integrity; co-localizes with Sur7p in punctate membrane patches; null mutant displays decreased thermotolerance; transcription induced upon cell wall damage and metal ion stress                                                  |
| CAGL0C00275g | <i>CgHSP31</i> | 3,04 | 1,33E-05 | -              | Putative cysteine protease                                                                                                                                                                                                                                                          |
| CAGL0M13651g |                | 3,04 | 3,07E-06 | <i>PRC1</i>    | Vacuolar carboxypeptidase Y (proteinase C; CPY), broad-specificity C-terminal exopeptidase involved in non-specific protein degradation in the vacuole; member of the serine carboxypeptidase family                                                                                |
| CAGL0C02893g |                | 3,01 | 5,78E-06 | <i>HRK1</i>    | Protein kinase implicated in activation of the plasma membrane H(+)-ATPase Pma1p in response to glucose metabolism; plays a role in ion homeostasis                                                                                                                                 |
| CAGL0M11660g |                | 2,99 | 3,55E-06 | -              | Has domain(s) with predicted hydrolase activity                                                                                                                                                                                                                                     |
| CAGL0M07920g | <i>CgPDC</i>   | 2,98 | 1,83E-05 | <i>PDC1</i>    | Major of three pyruvate decarboxylase isozymes, key enzyme in alcoholic fermentation, decarboxylates pyruvate to acetaldehyde; subject to glucose-, ethanol-, and autoregulation; involved in amino acid catabolism                                                                 |
| CAGL0H03971g |                | 2,98 | 7,55E-06 | <i>YCP4</i>    | Protein of unknown function, has sequence and structural similarity to flavodoxins; predicted to be palmitoylated; the authentic, non-tagged protein is detected in highly purified mitochondria in high-throughput studies                                                         |
| CAGL0A00495g | <i>CgPMA1</i>  | 2,98 | 8,50E-06 | <i>PMA1</i>    | Plasma membrane H(+)-ATPase, pumps protons out of the cell; major regulator of cytoplasmic pH and plasma membrane potential; P2-type ATPase; Hsp30p plays a role in Pma1p regulation; interactions with Std1p appear to propagate [GAR+]                                            |
| CAGL0A01870g |                | 2,97 | 1,36E-05 | -              | Has domain(s) with predicted integral component of membrane localization                                                                                                                                                                                                            |
| CAGL0I06644g |                | 2,94 | 8,14E-04 | <i>SPI1</i>    | GPI-anchored cell wall protein involved in weak acid resistance; basal expression requires Msn2p/Msn4p; expression is induced under conditions of stress and during the diauxic shift; similar to Sed1p                                                                             |
| CAGL0I06182g | <i>CgPIR2</i>  | 2,94 | 2,06E-05 | <i>HSP150</i>  | O-mannosylated heat shock protein that is secreted and covalently attached to the cell wall via beta-1,3-glucan and disulfide bridges; required for cell wall stability; induced by heat shock, oxidative stress, and nitrogen limitation                                           |
| CAGL0M06897g |                | 2,91 | 8,50E-05 | <i>YNL024C</i> | Putative methyltransferase; has seven beta-strand methyltransferase motif; green fluorescent protein (GFP)-fusion protein localizes to the cytoplasm; despite similarity to methyltransferases, null mutant does not display alterations in lysine methylation pattern              |
| CAGL0J07568g |                | 2,91 | 1,05E-05 | <i>LAP3</i>    | Cysteine aminopeptidase with homocysteine-thiolactonase activity; protects cells against homocysteine toxicity; has bleomycin hydrolase activity in vitro; transcription is regulated by galactose via Gal4p; orthologous to human BLMH                                             |
| CAGL0H07469g |                | 2,90 | 3,42E-06 | <i>ICS2</i>    | Protein of unknown function; null mutation does not confer any obvious defects in growth, spore germination, viability, or carbohydrate utilization                                                                                                                                 |
| CAGL0G05698g | <i>CgGDH2</i>  | 2,89 | 1,19E-05 | <i>GDH2</i>    | NAD(+)-dependent glutamate dehydrogenase, degrades glutamate to ammonia and alpha-ketoglutarate; expression sensitive to nitrogen catabolite repression and intracellular ammonia levels                                                                                            |
| CAGL0M08492g | <i>CgPIR3</i>  | 2,88 | 6,55E-06 | <i>PIR1</i>    | O-glycosylated protein required for cell wall stability; attached to the cell wall via beta-1,3-glucan; mediates mitochondrial translocation of Apn1p; expression regulated by the cell integrity pathway and by Swi5p during the cell cycle                                        |
| CAGL0A01716g |                | 2,87 | 6,32E-05 | <i>PNC1</i>    | Nicotinamidase that converts nicotinamide to nicotinic acid as part of the NAD(+) salvage pathway, required for life span extension by calorie restriction; PNC1 expression responds to all known stimuli that extend replicative life span                                         |
| CAGL0E03630g |                | 2,84 | 1,52E-05 | <i>RIM4</i>    | Putative RNA-binding protein required for the expression of early and middle sporulation genes                                                                                                                                                                                      |
| CAGL0L02497g | <i>CgFBA1</i>  | 2,84 | 8,94E-06 | <i>FBA1</i>    | Fructose 1,6-bisphosphate aldolase, required for glycolysis and gluconeogenesis; catalyzes conversion of fructose 1,6 bisphosphate to glyceraldehyde-3-P and dihydroxyacetone-P; locates to mitochondrial outer surface upon oxidative stress                                       |
| CAGL0J11462g |                | 2,84 | 6,38E-06 | <i>YNL190W</i> | Hydrophilin essential in desiccation-rehydration process; cell wall protein; contains a putative GPI-attachment site                                                                                                                                                                |
| CAGL0G03267g |                | 2,80 | 7,17E-06 | <i>AST2</i>    | Similar to lipid raft associated protein Ast1p; similarly to Ast1p, overexpression restores Pma1p localization to lipid rafts which is required for targeting of Pma1p to the plasma membrane; sometimes classified in the medium-chain dehydrogenase/reductases (MDRs) superfamily |
| CAGL0A01650g |                | 2,80 | 3,76E-06 | <i>ECL1</i>    | Protein of unknown function, affects chronological lifespan; induced by iron homeostasis transcription factor Aft2p; multicopy suppressor of temperature sensitive hsf1 mutant; induced by treatment with 8-methoxypsoralen and UVA irradiation                                     |
| CAGL0E01749g | <i>CgYPS4</i>  | 2,78 | 3,45E-05 | -              | Putative aspartic protease; member of a YPS gene cluster that is required for virulence in mice; induced in response to low pH and high temperature                                                                                                                                 |
| CAGL0L06424g |                | 2,77 | 1,45E-04 | <i>CCCW12</i>  | Predicted GPI-linked adhesin-like protein                                                                                                                                                                                                                                           |
| CAGL0F06413g |                | 2,77 | 2,33E-03 | <i>FET3</i>    | Ferro-O2-oxidoreductase required for high-affinity iron uptake and involved in mediating resistance to copper ion toxicity, belongs to class of integral membrane multicopper oxidases                                                                                              |
| CAGL0H08393g |                | 2,75 | 2,62E-04 | <i>BAP2</i>    | High-affinity leucine permease, functions as a branched-chain amino acid permease involved in the uptake of leucine, isoleucine and valine; contains 12 predicted transmembrane domains                                                                                             |
| CAGL0D01270g |                | 2,75 | 1,90E-04 | -              | Unknown                                                                                                                                                                                                                                                                             |
| CAGL0M12034g | <i>CgPYK1</i>  | 2,72 | 1,08E-04 | <i>CDC19</i>   | Pyruvate kinase, functions as a homotetramer in glycolysis to convert phosphoenolpyruvate to pyruvate, the input for aerobic (TCA cycle) or anaerobic (glucose fermentation) respiration                                                                                            |
| CAGL0K02145g |                | 2,71 | 3,82E-06 | <i>YER130C</i> | Protein of unknown function; transcription is regulated by Haa1p, Sok2p and Zap1p transcriptional activators; computational analysis suggests a role as a transcription factor; <i>C. albicans</i> homolog (MNL1) plays a role in adaptation to stress                              |
| CAGL0L05786g |                | 2,71 | 2,16E-05 | <i>YPR013C</i> | Putative zinc finger protein; YPR013C is not an essential gene                                                                                                                                                                                                                      |
| CAGL0F03707g |                | 2,71 | 4,31E-06 | <i>HRK1</i>    | Protein kinase implicated in activation of the plasma membrane H(+)-ATPase Pma1p in response to glucose metabolism; plays a role in ion homeostasis                                                                                                                                 |
| CAGL0D03322g |                | 2,70 | 6,91E-06 | <i>IZH3</i>    | Membrane protein involved in zinc ion homeostasis, member of the four-protein IZH family, expression induced by zinc deficiency; deletion reduces sensitivity to elevated zinc and shortens lag phase, overexpression reduces Zap1p activity                                        |
| CAGL0G09603g |                | 2,69 | 6,69E-05 | <i>YOR186W</i> | Putative protein of unknown function; proper regulation of expression during heat stress is sphingolipid-dependent                                                                                                                                                                  |
| CAGL0M12430g | <i>CgRHR2</i>  | 2,68 | 1,32E-05 | <i>RHR2</i>    | Constitutively expressed isoform of DL-glycerol-3-phosphatase; involved in glycerol biosynthesis, induced in response to both anaerobic and, along with the Hor2p/Gpp2p isoform, osmotic stress                                                                                     |
| CAGL0G01474g |                | 2,66 | 3,57E-05 | <i>BOP3</i>    | Protein of unknown function, potential Cdc28p substrate; overproduction confers resistance to methylmercury                                                                                                                                                                         |
| CAGL0J03080g |                | 2,65 | 7,58E-04 | <i>RGI1</i>    | Protein of unknown function involved in energy metabolism under respiratory conditions; protein abundance is increased upon intracellular iron depletion                                                                                                                            |
| CAGL0K07634g | <i>CgGAT1</i>  | 2,65 | 3,38E-05 | <i>GAT1</i>    | Transcriptional activator of genes involved in nitrogen catabolite repression; contains a GATA-1-type zinc finger DNA-binding motif; activity and localization regulated by nitrogen limitation and Ure2p                                                                           |

|              |         |      |          |           |                                                                                                                                                                                                                                                                                                                                                                                                                                             |
|--------------|---------|------|----------|-----------|---------------------------------------------------------------------------------------------------------------------------------------------------------------------------------------------------------------------------------------------------------------------------------------------------------------------------------------------------------------------------------------------------------------------------------------------|
| CAGL0L08030g |         | 2,64 | 1,44E-05 | SLM5      | Mitochondrial asparaginyl-tRNA synthetase                                                                                                                                                                                                                                                                                                                                                                                                   |
| CAGL0H08844g |         | 2,64 | 2,49E-04 | DDR48     | DNA damage-responsive protein, expression is increased in response to heat-shock stress or treatments that produce DNA lesions; contains multiple repeats of the amino acid sequence NNNDYGS                                                                                                                                                                                                                                                |
| CAGL0I01342g |         | 2,63 | 3,53E-05 | GLY1      | Threonine aldolase, catalyzes the cleavage of L-allo-threonine and L-threonine to glycine; involved in glycine biosynthesis                                                                                                                                                                                                                                                                                                                 |
| CAGL0F07117g |         | 2,63 | 1,47E-05 | GPG1      | Proposed gamma subunit of the heterotrimeric G protein that interacts with the receptor Gpr1p; involved in regulation of pseudohyphal growth; requires Gpb1p or Gpb2p to interact with Gpa2p; overproduction causes prion curing                                                                                                                                                                                                            |
| CAGL0L03696g |         | 2,62 | 2,36E-05 | ECM3      | Non-essential protein of unknown function; involved in signal transduction and the genotoxic response; induced rapidly in response to treatment with 8-methoxypsoralen and UVA irradiation                                                                                                                                                                                                                                                  |
| CAGL0J04202g | CgHSP12 | 2,61 | 1,24E-04 | HSP12     | Plasma membrane protein involved in maintaining membrane organization in stress conditions; induced by heat shock, oxidative stress, osmotic stress, stationary phase, glucose depletion, oleate and alcohol; regulated by HOG and Ras-Pka pathways                                                                                                                                                                                         |
| CAGL0G04081g |         | 2,60 | 4,79E-05 | THI73     | Putative plasma membrane permease proposed to be involved in carboxylic acid uptake and repressed by thiamine; substrate of Dbf2p/Mob1p kinase; transcription is altered if mitochondrial dysfunction occurs                                                                                                                                                                                                                                |
| CAGL0H08327g | CgTPI1  | 2,60 | 9,36E-06 | TPI1      | Triose phosphate isomerase, abundant glycolytic enzyme; mRNA half-life is regulated by iron availability; transcription is controlled by activators Reb1p, Gcr1p, and Rap1p through binding sites in the 5' non-coding region; inhibition of Tpi1p activity by PEP (phosphoenolpyruvate) stimulates redox metabolism in respiring cells; E104D mutation in human TPI causes a rare autosomal disease                                        |
| CAGL0C03740g |         | 2,59 | 6,57E-06 | MIT1      | Transcriptional regulator of pseudohyphal growth; protein with sequence similarity to <i>S. pombe</i> gti1+ (gluconate transport inducer 1) and <i>C. albicans</i> Wor1                                                                                                                                                                                                                                                                     |
| CAGL0B03619g |         | 2,58 | 1,08E-03 | PRB1      | Vacuolar proteinase B (yscB), a serine protease of the subtilisin family; involved in protein degradation in the vacuole and required for full protein degradation during sporulation; activity inhibited by Pbi2p                                                                                                                                                                                                                          |
| CAGL0I05874g |         | 2,57 | 1,18E-04 | NA        | NA                                                                                                                                                                                                                                                                                                                                                                                                                                          |
| CAGL0J04026g |         | 2,56 | 5,55E-06 | HER1      | Protein of unknown function required for proliferation or remodeling of the ER that is caused by overexpression of Hmg2p; may interact with ribosomes, based on co-purification experiments                                                                                                                                                                                                                                                 |
| CAGL0I04246g |         | 2,56 | 1,07E-04 | SUT1      | Transcription factor of the Zn[II]2Cys6 family involved in sterol uptake; involved in induction of hypoxic gene expression                                                                                                                                                                                                                                                                                                                  |
| CAGL0E01837g | CgYPS9  | 2,56 | 1,38E-05 | -         | Putative aspartic protease; predicted GPI-anchor; member of a YPS gene cluster that is required for virulence in mice; expression induced at high temperature                                                                                                                                                                                                                                                                               |
| CAGL0H08778g |         | 2,55 | 1,07E-05 | PUF2      | Member of the PUF protein family, which is defined by the presence of Pumilio homology domains that confer RNA binding activity; preferentially binds mRNAs encoding membrane-associated proteins                                                                                                                                                                                                                                           |
| CAGL0E04774g |         | 2,55 | 2,25E-05 | YDR222W   | Protein of unknown function; green fluorescent protein (GFP)-fusion protein localizes to the cytoplasm in a punctate pattern                                                                                                                                                                                                                                                                                                                |
| CAGL0F08371g | CgTNA1  | 2,54 | 1,74E-04 | TNA1      | High affinity nicotinic acid plasma membrane permease, responsible for uptake of low levels of nicotinic acid; expression of the gene increases in the absence of extracellular nicotinic acid or para-aminobenzoate (PABA)                                                                                                                                                                                                                 |
| CAGL0D01276g |         | 2,51 | 8,60E-06 | OPY2      | Integral membrane protein that functions in the signaling branch of the high-osmolarity glycerol (HOG) pathway; interacts with Ste50p; overproduction blocks cell cycle arrest in the presence of mating pheromone                                                                                                                                                                                                                          |
| CAGL0M11000g |         | 2,50 | 2,79E-03 | YNR034W-A | Putative protein of unknown function; expression is regulated by Msn2p/Msn4p                                                                                                                                                                                                                                                                                                                                                                |
| CAGL0G03531g |         | 2,49 | 3,59E-05 | SPR6      | Protein of unknown function, expressed during sporulation; not required for sporulation, but gene exhibits genetic interactions with other genes required for sporulation                                                                                                                                                                                                                                                                   |
| CAGL0K09372g |         | 2,47 | 9,76E-06 | MIG2      | Zinc finger transcriptional repressor; cooperates with Mig1p in glucose-induced repression of many genes including SUC2 (invertase); binds to Mig1p-binding sites in SUC2 promoter; under low glucose conditions Mig2p relocates to mitochondrion, where it regulates morphology, interacts with Ups1p and antagonizes mitochondrial fission factor, Dnm1p, indicative of a role in promoting mitochondrial fusion or regulating morphology |
| CAGL0J00715g |         | 2,46 | 2,26E-05 | YHR022C   | Putative protein of unknown function; YHR022C is not an essential gene                                                                                                                                                                                                                                                                                                                                                                      |
| CAGL0H01375g | CgSUR2  | 2,44 | 9,18E-05 | SUR2      | Sphinganine C4-hydroxylase, catalyzes the conversion of sphinganine to phytosphingosine in sphingolipid biosynthesis                                                                                                                                                                                                                                                                                                                        |
| CAGL0I05060g |         | 2,43 | 3,58E-04 | DOT6      | Protein involved in rRNA and ribosome biogenesis; binds polymerase A and C motif; subunit of the RPD3L histone deacetylase complex; similar to Tod6p; has chromatin specific SANT domain; involved in telomeric gene silencing and filamentation                                                                                                                                                                                            |
| CAGL0F08041g | CgPFK1  | 2,43 | 3,45E-05 | PFK1      | Alpha subunit of heterooctameric phosphofructokinase involved in glycolysis, indispensable for anaerobic growth, activated by fructose-2,6-bisphosphate and AMP, mutation inhibits glucose induction of cell cycle-related genes                                                                                                                                                                                                            |
| CAGL0K03663g |         | 2,43 | 4,24E-05 | YMR122W-A | Protein of unknown function; green fluorescent protein (GFP)-fusion protein localizes to the cytoplasm and endoplasmic reticulum                                                                                                                                                                                                                                                                                                            |
| CAGL0H02563g |         | 2,42 | 4,65E-05 | HOR7      | Protein of unknown function; overexpression suppresses Ca <sup>2+</sup> sensitivity of mutants lacking inositol phosphorylceramide mannosyltransferases Csg1p and Csh1p; transcription is induced under hyperosmotic stress and repressed by alpha factor                                                                                                                                                                                   |
| CAGL0D05566g |         | 2,42 | 4,98E-05 | YEH1      | Steryl ester hydrolase, one of three gene products (Yeh1p, Yeh2p, Tgl1p) responsible for steryl ester hydrolase activity and involved in sterol homeostasis; localized to lipid particle membranes                                                                                                                                                                                                                                          |
| CAGL0E01793g | CgYPS6  | 2,40 | 6,59E-05 | NA        | NA                                                                                                                                                                                                                                                                                                                                                                                                                                          |
| CAGL0G04763g |         | 2,38 | 2,54E-04 | RGS2      | Negative regulator of glucose-induced cAMP signaling; directly activates the GTPase activity of the heterotrimeric G protein alpha subunit Gpa2p                                                                                                                                                                                                                                                                                            |
| CAGL0K06853g |         | 2,38 | 1,11E-04 | PCS60     | Peroxisomal protein that binds AMP and mRNA, localizes to both the peroxisomal peripheral membrane and matrix, expression is highly inducible by oleic acid, similar to <i>E. coli</i> long chain acyl-CoA synthetase                                                                                                                                                                                                                       |
| CAGL0E04312g |         | 2,38 | 5,98E-05 | STP2      | Transcription factor, activated by proteolytic processing in response to signals from the SPS sensor system for external amino acids; activates transcription of amino acid permease genes                                                                                                                                                                                                                                                  |
| CAGL0H02519g |         | 2,37 | 2,07E-04 | YMR253C   | Putative protein of unknown function; green fluorescent protein (GFP)-fusion protein localizes to the cytoplasm in a punctate pattern; YMR253C is not an essential gene                                                                                                                                                                                                                                                                     |
| CAGL0M07634g |         | 2,37 | 2,00E-04 | SOK2      | Nuclear protein that plays a regulatory role in the cyclic AMP (cAMP)-dependent protein kinase (PKA) signal transduction pathway; negatively regulates pseudohyphal differentiation; homologous to several transcription factors                                                                                                                                                                                                            |
| CAGL0M00748g | CgECM7  | 2,36 | 3,02E-05 | ECM7      | Non-essential putative integral membrane protein with a role in calcium uptake; mutant has cell wall defects and Ca <sup>2+</sup> uptake deficiencies; transcription is induced under conditions of zinc deficiency                                                                                                                                                                                                                         |

|              |         |      |          |         |                                                                                                                                                                                                                                                                                                                                                                                                            |
|--------------|---------|------|----------|---------|------------------------------------------------------------------------------------------------------------------------------------------------------------------------------------------------------------------------------------------------------------------------------------------------------------------------------------------------------------------------------------------------------------|
| CAGLOG08844g |         | 2,35 | 2,30E-04 | ASG1    | Zinc cluster protein proposed to function as a transcriptional regulator involved in the stress response; null mutants have a respiratory deficiency, calcofluor white sensitivity and slightly increased cycloheximide resistance                                                                                                                                                                         |
| CAGLOB01875g |         | 2,33 | 2,22E-04 | COX26   | Putative protein of unknown function; copurifies with respiratory chain supercomplexes composed of Complex III (ubiquinol-cytochrome c reductase) and Complex IV (cytochrome c oxidase)                                                                                                                                                                                                                    |
| CAGLOE01881g | CgYPS11 | 2,32 | 5,58E-05 | -       | Putative aspartic protease; member of a YPS gene cluster that is required for virulence in mice; induced in response to low pH and high temperature                                                                                                                                                                                                                                                        |
| CAGLOF08217g |         | 2,30 | 6,42E-04 | YGR250C | Putative RNA binding protein; localizes to stress granules induced by glucose deprivation; interacts with Rbg1p in a two-hybrid                                                                                                                                                                                                                                                                            |
| CAGLOJ10846g |         | 2,30 | 1,49E-05 | PCL5    | Cyclin, interacts with and phosphorylated by Pho85p cyclin-dependent kinase (Cdk), induced by Gcn4p at level of transcription, specifically required for Gcn4p degradation, may be sensor of cellular protein biosynthetic capacity                                                                                                                                                                        |
| CAGLOJ06028g | CgMEP2  | 2,27 | 5,81E-03 | MEP2    | Ammonium permease involved in regulation of pseudohyphal growth; belongs to a ubiquitous family of cytoplasmic membrane proteins that transport only ammonium (NH4+); expression is under the nitrogen catabolite repression regulation                                                                                                                                                                    |
| CAGLOD04026g |         | 2,27 | 1,36E-04 | UGA1    | Gamma-aminobutyrate (GABA) transaminase (4-aminobutyrate aminotransferase) involved in the 4-aminobutyrate and glutamate degradation pathways; required for normal oxidative stress tolerance and nitrogen utilization                                                                                                                                                                                     |
| CAGLOL06072g |         | 2,26 | 5,51E-05 | YER130C | Protein of unknown function; transcription is regulated by Haa1p, Sok2p and Zap1p transcriptional activators; computational analysis suggests a role as a transcription factor; C. albicans homolog (MNL1) plays a role in adaptation to stress                                                                                                                                                            |
| CAGLOE05654g |         | 2,24 | 3,25E-05 | PGC1    | Phosphatidyl Glycerol phospholipase C; regulates the phosphatidylglycerol (PG) content via a phospholipase C-type degradation mechanism; contains glycerophosphodiester phosphodiesterase motifs                                                                                                                                                                                                           |
| CAGLOI09900g |         | 2,23 | 2,74E-03 | POR1    | Mitochondrial porin (voltage-dependent anion channel), outer membrane protein required for the maintenance of mitochondrial osmotic stability and mitochondrial membrane permeability; phosphorylated                                                                                                                                                                                                      |
| CAGLOD05082g |         | 2,21 | 6,76E-05 | UBI4    | Ubiquitin, becomes conjugated to proteins, marking them for selective degradation via the ubiquitin-26S proteasome system; essential for the cellular stress response; encoded as a polyubiquitin precursor comprised of 5 head-to-tail repeats                                                                                                                                                            |
| CAGLOK07458g |         | 2,20 | 8,61E-05 | YPK1    | Serine/threonine protein kinase; phosphorylates and downregulates flippase activator Fpk1p; also inactivates Orm1p and Orm2p (inhibitors of serine:palmitoyl-coenzyme A transferase) by phosphorylation in response to compromised sphingolipid synthesis; mutations affect receptor-mediated endocytosis and sphingolipid-mediated and cell integrity signaling pathways; homolog of mammalian kinase SGK |
| CAGLOK07007g |         | 2,20 | 4,98E-04 | YBR238C | Mitochondrial membrane protein with similarity to Rmd9p; not required for respiratory growth but causes a synthetic respiratory defect in combination with rmd9 mutations; transcriptionally up-regulated by TOR; deletion increases life span                                                                                                                                                             |
| CAGLOK02651g |         | 2,19 | 3,01E-05 | YHL008C | Putative protein of unknown function, may be involved in the uptake of chloride ions; does not appear to be involved in monocarboxylic acid transport; green fluorescent protein (GFP)-fusion protein localizes to the vacuole                                                                                                                                                                             |
| CAGLOH08888g |         | 2,18 | 1,81E-04 | FLC3    | Putative FAD transporter, similar to Flc1p and Flc2p; localized to the ER                                                                                                                                                                                                                                                                                                                                  |
| CAGLOJ10494g |         | 2,18 | 1,26E-04 | APT2    | Apparent pseudogene, not transcribed or translated under normal conditions; encodes a protein with similarity to adenine phosphoribosyltransferase, but artificially expressed protein exhibits no enzymatic activity                                                                                                                                                                                      |
| CAGLOF03641g |         | 2,18 | 2,33E-03 | NA      | NA                                                                                                                                                                                                                                                                                                                                                                                                         |
| CAGLOA02046g |         | 2,17 | 1,25E-04 | ROD1    | Membrane protein that binds the ubiquitin ligase Rsp5p via its 2 PY motifs; overexpression confers resistance to the GST substrate o-dinitrobenzene,zinc, and calcium; proposed to regulate the endocytosis of plasma membrane proteins                                                                                                                                                                    |
| CAGLOF04917g |         | 2,17 | 1,39E-04 | PIG1    | Putative targeting subunit for the type-1 protein phosphatase Glc7p that tethers it to the Gsy2p glycogen synthase                                                                                                                                                                                                                                                                                         |
| CAGLOI09108g |         | 2,17 | 2,01E-05 | -       | Unknown                                                                                                                                                                                                                                                                                                                                                                                                    |
| CAGLOC05071g |         | 2,15 | 3,52E-05 | THI20   | Trifunctional enzyme of thiamine biosynthesis, degradation and salvage; has hydroxymethylpyrimidine (HMP) kinase, HMP-phosphate (HMP-P) kinase and thiaminase activities; member of a gene family with THI21 and THI22; HMP and HMP-P kinase activity redundant with Thi21p                                                                                                                                |
| CAGLOF04807g |         | 2,15 | 1,17E-04 | OM45    | Protein of unknown function, major constituent of the mitochondrial outer membrane; located on the outer (cytosolic) face of the outer membrane                                                                                                                                                                                                                                                            |
| CAGLOI01100g | CgGCY1  | 2,15 | 1,44E-04 | GCY1    | Putative NADP(+) coupled glycerol dehydrogenase, proposed to be involved in an alternative pathway for glycerol catabolism; also has mRNA binding activity; member of the aldo-keto reductase (AKR) family                                                                                                                                                                                                 |
| CAGLOJ11242g |         | 2,15 | 1,89E-04 | RHO5    | Non-essential small GTPase of the Rho/Rac subfamily of Ras-like proteins, likely involved in protein kinase C (Pkc1p)-dependent signal transduction pathway that controls cell integrity                                                                                                                                                                                                                   |
| CAGLOL11154g |         | 2,14 | 3,34E-05 | NTE1    | Serine esterase, homolog of human neuropathy target esterase (NTE); Nte1p-mediated phosphatidylcholine turnover influences transcription factor Opi1p localization, affecting transcriptional regulation of phospholipid biosynthesis genes                                                                                                                                                                |
| CAGLOL01837g | CgVPS24 | 2,14 | 2,03E-05 | VPS24   | One of four subunits of the endosomal sorting complex required for transport III (ESCRT-III); forms an ESCRT-III subcomplex with Did4p; involved in the sorting of transmembrane proteins into the multivesicular body (MVB) pathway                                                                                                                                                                       |
| CAGLOK12144g | CgFES1  | 2,13 | 4,76E-05 | FES1    | Hsp70 (Ssa1p) nucleotide exchange factor, cytosolic homolog of Sli1p, which is the nucleotide exchange factor for BiP (Kar2p) in the endoplasmic reticulum                                                                                                                                                                                                                                                 |
| CAGLOC02541g |         | 2,13 | 7,55E-05 | BDF1    | Protein involved in transcription initiation at TATA-containing promoters; associates with the basal transcription factor TFIID; contains two bromodomains; corresponds to the C-terminal region of mammalian TAF1; redundant with Bdf2p                                                                                                                                                                   |
| CAGLOB00902g | CgHIS4  | 2,13 | 1,03E-04 | HIS4    | Multifunctional enzyme containing phosphoribosyl-ATP pyrophosphatase, phosphoribosyl-AMP cyclohydrolase, and histidinol dehydrogenase activities; catalyzes the second, third, ninth and tenth steps in histidine biosynthesis                                                                                                                                                                             |
| CAGLOH00110g |         | 2,13 | 1,57E-04 | -       | Adhesin-like protein with internal repeats; predicted GPI-anchor                                                                                                                                                                                                                                                                                                                                           |
| CAGLOM03179g |         | 2,13 | 4,90E-05 | YKR018C | Putative protein of unknown function; green fluorescent protein (GFP)-fusion protein localizes to the cytoplasm and nucleus                                                                                                                                                                                                                                                                                |
| CAGLOG07183g |         | 2,13 | 2,52E-04 | -       | Unknown                                                                                                                                                                                                                                                                                                                                                                                                    |
| CAGLOK09702g |         | 2,12 | 3,00E-04 | YNL134C | Putative protein of unknown function with similarity to dehydrogenases from other model organisms; green fluorescent protein (GFP)-fusion protein localizes to both the cytoplasm and nucleus and is induced by the DNA-damaging agent MMS                                                                                                                                                                 |
| CAGLOK12100g |         | 2,12 | 2,39E-05 | HEM13   | Coproporphyrinogen III oxidase, an oxygen requiring enzyme that catalyzes the sixth step in the heme biosynthetic pathway; transcription is repressed by oxygen and heme (via Rox1p and Hap1p)                                                                                                                                                                                                             |

|              |                |      |          |                |                                                                                                                                                                                                                                                                                                                         |
|--------------|----------------|------|----------|----------------|-------------------------------------------------------------------------------------------------------------------------------------------------------------------------------------------------------------------------------------------------------------------------------------------------------------------------|
| CAGL004495g  | <i>CgHSC82</i> | 2,11 | 1,11E-04 | <i>HSC82</i>   | Cytoplasmic chaperone of the Hsp90 family, redundant in function and nearly identical with Hsp82p, and together they are essential; expressed constitutively at 10-fold higher basal levels than HSP82 and induced 2-3 fold by heat shock                                                                               |
| CAGL0D04422g |                | 2,11 | 9,35E-05 | <i>YPL279C</i> | Putative protein of unknown function                                                                                                                                                                                                                                                                                    |
| CAGL0G10219g | <i>CgAWP12</i> | 2,11 | 2,63E-04 | -              | Adhesin-like protein with 5 tandem repeats                                                                                                                                                                                                                                                                              |
| CAGL0I09086g |                | 2,11 | 2,89E-04 | <i>ESBP6</i>   | Protein with similarity to monocarboxylate permeases, appears not to be involved in transport of monocarboxylates such as lactate, pyruvate or acetate across the plasma membrane                                                                                                                                       |
| CAGL0F07359g |                | 2,10 | 3,28E-05 | <i>YGL117W</i> | Putative protein of unknown function                                                                                                                                                                                                                                                                                    |
| CAGL0E06292g |                | 2,10 | 1,63E-04 | <i>YHR022C</i> | Putative protein of unknown function; YHR022C is not an essential gene                                                                                                                                                                                                                                                  |
| CAGL0L05236g | <i>CgMDH1</i>  | 2,08 | 2,22E-03 | <i>MDH1</i>    | Mitochondrial malate dehydrogenase, catalyzes interconversion of malate and oxaloacetate; involved in the tricarboxylic acid (TCA) cycle; phosphorylated                                                                                                                                                                |
| CAGL0G02849g |                | 2,08 | 3,58E-04 | <i>UIP4</i>    | Protein that interacts with Ulp1p, a Ubl (ubiquitin-like protein)-specific protease for Smt3p protein conjugates; detected in a phosphorylated state in the mitochondrial outer membrane; also detected in ER and nuclear envelope                                                                                      |
| CAGL0E06424g |                | 2,06 | 2,00E-03 | <i>MCR1</i>    | Mitochondrial NADH-cytochrome b5 reductase, involved in ergosterol biosynthesis                                                                                                                                                                                                                                         |
| CAGL0H08261g |                | 2,05 | 7,44E-05 | <i>YOR019W</i> | Protein of unknown function that may interact with ribosomes, based on co-purification experiments                                                                                                                                                                                                                      |
| CAGL0M12320g |                | 2,05 | 1,34E-04 | <i>FLC2</i>    | Putative FAD transporter; required for uptake of FAD into endoplasmic reticulum; involved in cell wall maintenance                                                                                                                                                                                                      |
| CAGL0I06204g | <i>CgPIR1</i>  | 2,05 | 4,70E-03 | <i>YJL160C</i> | Putative protein of unknown function; member of the PIR (proteins with internal repeats) family of cell wall proteins; non-essential gene that is required for sporulation; mRNA is weakly cell cycle regulated, peaking in mitosis                                                                                     |
| CAGL0K10428g |                | 2,05 | 2,37E-04 | <i>IGD1</i>    | Cytoplasmic protein that inhibits Gdb1p glycogen debranching activity; required for normal intracellular accumulation of glycogen; phosphorylated in vivo; expression increases during wine fermentation                                                                                                                |
| CAGL0L12012g |                | 2,04 | 1,32E-04 | <i>TMT1</i>    | Trans-aconitate methyltransferase, cytosolic enzyme that catalyzes the methyl esterification of 3-isopropylmalate, an intermediate of the leucine biosynthetic pathway, and trans-aconitate, which inhibits the citric acid cycle                                                                                       |
| CAGL0L10758g | <i>CgPFK2</i>  | 2,03 | 1,65E-04 | <i>PFK2</i>    | Beta subunit of heterooctameric phosphofructokinase involved in glycolysis, indispensable for anaerobic growth, activated by fructose-2,6-bisphosphate and AMP, mutation inhibits glucose induction of cell cycle-related genes                                                                                         |
| CAGL0K07546g | <i>CgPMU2</i>  | 2,03 | 1,19E-04 | -              | Putative phosphate starvation inducible acid phosphatase                                                                                                                                                                                                                                                                |
| CAGL0E06072g |                | 2,02 | 2,55E-04 | <i>YMR181C</i> | Protein of unknown function; mRNA transcribed as part of a bicistronic transcript with a predicted transcriptional repressor RGM1/YMR182C; mRNA is destroyed by nonsense-mediated decay (NMD); YMR181C is not an essential gene                                                                                         |
| CAGL0J11770g | <i>CgPLB1</i>  | 2,02 | 4,32E-05 | <i>PLB1</i>    | Phospholipase B (lysophospholipase) involved in lipid metabolism, required for deacylation of phosphatidylcholine and phosphatidylethanolamine but not phosphatidylinositol                                                                                                                                             |
| CAGL0G02937g |                | 2,01 | 1,05E-03 | -              | Ortholog(s) have pyruvate decarboxylase activity and role in L-phenylalanine catabolic process                                                                                                                                                                                                                          |
| CAGL0D01298g | <i>CgTKL1</i>  | 2,01 | 4,37E-03 | <i>TKL1</i>    | Transketolase, similar to Tkl2p; catalyzes conversion of xylulose-5-phosphate and ribose-5-phosphate to sedoheptulose-7-phosphate and glyceraldehyde-3-phosphate in the pentose phosphate pathway; needed for synthesis of aromatic amino acids                                                                         |
| CAGL0I06743g |                | 2,00 | 3,37E-03 | <i>FTR1</i>    | High affinity iron permease involved in the transport of iron across the plasma membrane; forms complex with Fet3p; expression is regulated by iron                                                                                                                                                                     |
| CAGL0M07315g |                | 2,00 | 2,34E-04 | <i>SUR1</i>    | Probable catalytic subunit of a mannosylinositol phosphorylceramide (MIPC) synthase, forms a complex with probable regulatory subunit Csg2p; function in sphingolipid biosynthesis is overlapping with that of Csh1p                                                                                                    |
| CAGL0J05060g |                | 1,98 | 8,24E-05 | <i>ZAP1</i>    | Zinc-regulated transcription factor; binds to zinc-responsive promoters to induce transcription of certain genes in presence of zinc, represses other genes in low zinc; regulates its own transcription; contains seven zinc-finger domains                                                                            |
| CAGL0G09042g |                | 1,98 | 7,17E-05 | <i>AFT2</i>    | Iron-regulated transcriptional activator; activates genes involved in intracellular iron use and required for iron homeostasis and resistance to oxidative stress; similar to Aft1p                                                                                                                                     |
| CAGL0E05588g |                | 1,97 | 7,53E-05 | <i>REV1</i>    | Deoxycytidyl transferase; involved in repair of abasic sites and adducted guanines in damaged DNA by translesion synthesis (TLS); forms a complex with the subunits of DNA polymerase zeta, Rev3p and Rev7p;                                                                                                            |
| CAGL0K04169g |                | 1,97 | 7,12E-05 | <i>KSS1</i>    | Mitogen-activated protein kinase (MAPK) involved in signal transduction pathways that control filamentous growth and pheromone response; the KSS1 gene is nonfunctional in S288C strains and functional in W303 strains                                                                                                 |
| CAGL0K01155g |                | 1,97 | 1,55E-03 | <i>YGR079W</i> | Putative protein of unknown function; YGR079W is not an essential gene                                                                                                                                                                                                                                                  |
| CAGL0E05456g |                | 1,97 | 2,10E-04 | <i>YOR338W</i> | Putative protein of unknown function; YOR338W transcription is regulated by Azf1p and its transcript is a specific target of the G protein effector Scp160p; identified as being required for sporulation in a high-throughput mutant screen                                                                            |
| CAGL0M06347g |                | 1,97 | 9,00E-05 | <i>YPC1</i>    | Alkaline ceramidase that also has reverse (CoA-independent) ceramide synthase activity, catalyzes both breakdown and synthesis of phytoceramide; overexpression confers fumonisin B1 resistance                                                                                                                         |
| CAGL0L06974g |                | 1,96 | 8,98E-04 | <i>YDL086W</i> | Putative protein of unknown function; the authentic, non-tagged protein is detected in highly purified mitochondria in high-throughput studies; YDL086W is not an essential gene                                                                                                                                        |
| CAGL0J09262g |                | 1,95 | 3,12E-04 | <i>STF1</i>    | Protein involved in regulation of the mitochondrial F1F0-ATP synthase; Stf1p and Stf2p act as stabilizing factors that enhance inhibitory action of the Inh1p protein                                                                                                                                                   |
| CAGL0F02167g |                | 1,94 | 2,18E-04 | <i>MSH4</i>    | Protein involved in meiotic recombination, required for normal levels of crossing over, colocalizes with Zip2p to discrete foci on meiotic chromosomes, has homology to bacterial MutS protein                                                                                                                          |
| CAGL0I01276g |                | 1,93 | 3,33E-03 | <i>YHR112C</i> | Protein of unknown function; localizes to the cytoplasm and nucleus; overexpression affects protein trafficking through the endocytic pathway                                                                                                                                                                           |
| CAGL0I05390g |                | 1,93 | 2,26E-04 | <i>SKS1</i>    | Putative serine/threonine protein kinase; involved in the adaptation to low concentrations of glucose independent of the SNF3 regulated pathway                                                                                                                                                                         |
| CAGL0I07843g | <i>CgADH1</i>  | 1,93 | 2,18E-03 | <i>ADH1</i>    | Alcohol dehydrogenase, fermentative isozyme active as homo- or heterotetramers; required for the reduction of acetaldehyde to ethanol, the last step in the glycolytic pathway                                                                                                                                          |
| CAGL0B02475g | <i>CgPHO84</i> | 1,93 | 7,93E-04 | <i>PHO84</i>   | High-affinity inorganic phosphate (Pi) transporter and low-affinity manganese transporter; regulated by Pho4p and Spt7p; mutation confers resistance to arsenate; exit from the ER during maturation requires Pho86p; cells overexpressing Pho84p accumulate heavy metals but do not develop symptoms of metal toxicity |
| CAGL0K07183g |                | 1,92 | 5,69E-03 | -              | Unknown                                                                                                                                                                                                                                                                                                                 |

|              |               |      |          |                |                                                                                                                                                                                                                                                                                                                                                                                                                                                                                               |
|--------------|---------------|------|----------|----------------|-----------------------------------------------------------------------------------------------------------------------------------------------------------------------------------------------------------------------------------------------------------------------------------------------------------------------------------------------------------------------------------------------------------------------------------------------------------------------------------------------|
| CAGL0K11858g |               | 1,92 | 3,35E-04 | <i>PST2</i>    | Protein with similarity to members of a family of flavodoxin-like proteins; induced by oxidative stress in a Yap1p dependent manner; the authentic, non-tagged protein is detected in highly purified mitochondria in high-throughput studies                                                                                                                                                                                                                                                 |
| CAGL0I00550g |               | 1,91 | 1,16E-03 | <i>YLR297W</i> | Putative protein of unknown function; green fluorescent protein (GFP)-fusion protein localizes to the vacuole; YLR297W is not an essential gene; induced by treatment with 8-methoxypsoralen and UVA irradiation                                                                                                                                                                                                                                                                              |
| CAGL0H08305g |               | 1,91 | 3,48E-04 | <i>DET1</i>    | Acid phosphatase involved in the non-vesicular transport of sterols in both directions between the endoplasmic reticulum and plasma membrane; deletion confers sensitivity to nickel                                                                                                                                                                                                                                                                                                          |
| CAGL0B03069g | <i>CgTAL1</i> | 1,90 | 8,89E-03 | <i>TAL1</i>    | Transaldolase, enzyme in the non-oxidative pentose phosphate pathway; converts sedoheptulose 7-phosphate and glyceraldehyde 3-phosphate to erythrose 4-phosphate and fructose 6-phosphate                                                                                                                                                                                                                                                                                                     |
| CAGL0F03399g | <i>CgSCS7</i> | 1,88 | 1,44E-04 | <i>SCS7</i>    | Sphingolipid alpha-hydroxylase, functions in the alpha-hydroxylation of sphingolipid-associated very long chain fatty acids, has both cytochrome b5-like and hydroxylase/desaturase domains, not essential for growth                                                                                                                                                                                                                                                                         |
| CAGL0H08195g |               | 1,88 | 3,14E-04 | <i>STI1</i>    | Hsp90 cochaperone, interacts with the Ssa group of the cytosolic Hsp70 chaperones and activates Ssa1p ATPase activity; interacts with Hsp90 chaperones and inhibits their ATPase activity; homolog of mammalian Hop                                                                                                                                                                                                                                                                           |
| CAGL0L03267g | <i>CgGAP1</i> | 1,87 | 6,74E-03 | <i>GAP1</i>    | General amino acid permease; Gap1p senses the presence of amino acid substrates to regulate localization to the plasma membrane when needed                                                                                                                                                                                                                                                                                                                                                   |
| CAGL0L07480g |               | 1,87 | 1,23E-04 | <i>NRG2</i>    | Transcriptional repressor that mediates glucose repression and negatively regulates filamentous growth; has similarity to Nrg1p                                                                                                                                                                                                                                                                                                                                                               |
| CAGL0I07821g |               | 1,87 | 1,14E-04 | <i>DUF1</i>    | Ubiquitin-binding protein of unknown function; contains one WD40 repeat in a beta-propeller fold; green fluorescent protein (GFP)-fusion protein localizes to the cytoplasm; homolog of human WDR48/UAF1, which is involved in regulating the Fanconi anemia pathway; deletion mutant is sensitive to various chemicals including phenanthroline, sanguinarine, and nordihydroguaiaretic acid                                                                                                 |
| CAGL0M03135g |               | 1,87 | 1,75E-04 | <i>ALY2</i>    | Alpha arrestin that controls nutrient-mediated intracellular sorting of permease Gap1p; interacts with AP-1 subunit Apl4p; phosphorylated by Npr1p and also by cyclin-CDK complex Pcl7p-Pho85p; promotes endocytosis of plasma membrane proteins                                                                                                                                                                                                                                              |
| CAGL0B00990g |               | 1,86 | 2,15E-04 | <i>FRM2</i>    | Type II nitroreductase, using NADH as reductant; mutants are defective in fatty acid mediated repression of genes involved in fatty acid biosynthesis indicative of a role in lipid signaling; involved in the oxidative stress response; transcription induction by cadmium and selenite indicates a possible role in the metal stress response; expression induced in cells treated with the mycotoxin patulin                                                                              |
| CAGL0C00319g |               | 1,85 | 2,95E-04 | <i>CPS1</i>    | Vacuolar carboxypeptidase yscS; expression is induced under low-nitrogen conditions                                                                                                                                                                                                                                                                                                                                                                                                           |
| CAGL0H02959g | <i>CgTOS8</i> | 1,85 | 1,20E-03 | <i>TOS8</i>    | Homeodomain-containing protein and putative transcription factor found associated with chromatin; target of SBF transcription factor; induced during meiosis and under cell-damaging conditions; similar to Cup9p transcription factor                                                                                                                                                                                                                                                        |
| CAGL0L10582g |               | 1,85 | 7,84E-04 | <i>YMR196W</i> | Putative protein of unknown function; green fluorescent protein (GFP)-fusion protein localizes to the cytoplasm; YMR196W is not an essential gene                                                                                                                                                                                                                                                                                                                                             |
| CAGL0F00605g | <i>CgGLK1</i> | 1,85 | 6,46E-03 | <i>EM12</i>    | Aldohexose specific glucokinase                                                                                                                                                                                                                                                                                                                                                                                                                                                               |
| CAGL0E06116g |               | 1,84 | 3,37E-04 | <i>RGM1</i>    | Putative zinc finger DNA binding transcription factor; contains two N-terminal C2H2 zinc fingers and C-terminal proline rich domain; overproduction impairs cell growth and induces expression of genes involved in monosaccharide catabolism and aldehyde metabolism; deletion decreases expression of Y-prime telomeric elements; regulates expression of subtelomeric COS genes in conjunction with RNA binding protein Pub1p; localized to X elements within subtelomeric regions by ChIP |
| CAGL0K07678g |               | 1,84 | 2,77E-04 | -              | Unknown                                                                                                                                                                                                                                                                                                                                                                                                                                                                                       |
| CAGL0K05357g | <i>CgGLN1</i> | 1,84 | 1,63E-03 | <i>GLN1</i>    | Glutamine synthetase (GS), synthesizes glutamine from glutamate and ammonia; with Glt1p, forms the secondary pathway for glutamate biosynthesis from ammonia; expression regulated by nitrogen source and by amino acid limitation                                                                                                                                                                                                                                                            |
| CAGL0H04037g |               | 1,84 | 1,60E-03 | <i>GAC1</i>    | Regulatory subunit for Glc7p type-1 protein phosphatase (PP1), tethers Glc7p to Gsy2p glycogen synthase, binds Hsf1p heat shock transcription factor, required for induction of some HSF-regulated genes under heat shock                                                                                                                                                                                                                                                                     |
| CAGL0B04675g |               | 1,83 | 9,99E-05 | <i>DOM34</i>   | Protein that, with binding partner Hbs1p, facilitates ribosomal subunit dissociation when translation is stalled; required for RNA cleavage in no-go decay, but reports conflict on endonuclease activity; Pelota ortholog                                                                                                                                                                                                                                                                    |
| CAGL0I08613g | <i>CgDUR3</i> | 1,83 | 8,74E-05 | -              | Putative plasma membrane polyamine transporter                                                                                                                                                                                                                                                                                                                                                                                                                                                |
| CAGL0F06369g |               | 1,83 | 2,60E-04 | <i>LHS1</i>    | Molecular chaperone of the endoplasmic reticulum lumen, involved in polypeptide translocation and folding; nucleotide exchange factor for the ER luminal Hsp70 chaperone Kar2p; regulated by the unfolded protein response pathway                                                                                                                                                                                                                                                            |
| CAGL0J04268g |               | 1,83 | 8,46E-05 | <i>ACH1</i>    | Protein with CoA transferase activity, particularly for CoASH transfer from succinyl-CoA to acetate; has minor acetyl-CoA-hydrolase activity; phosphorylated; required for acetate utilization and for diploid pseudohyphal growth                                                                                                                                                                                                                                                            |
| CAGL0F09207g | <i>CgBAT1</i> | 1,82 | 9,68E-05 | <i>BAT1</i>    | Mitochondrial branched-chain amino acid (BCAA) aminotransferase, preferentially involved in BCAA biosynthesis; homolog of murine ECA39; highly expressed during logarithmic phase and repressed during stationary phase                                                                                                                                                                                                                                                                       |
| CAGL0G07271g |               | 1,82 | 1,57E-03 | <i>TSA1</i>    | Thioredoxin peroxidase, acts as both a ribosome-associated and free cytoplasmic antioxidant; self-associates to form a high-molecular weight chaperone complex under oxidative stress; deletion results in mutator phenotype                                                                                                                                                                                                                                                                  |
| CAGL0K01727g | <i>CgRPN4</i> | 1,82 | 1,26E-04 | <i>RPN4</i>    | Transcription factor that stimulates expression of proteasome genes; Rpn4p levels are in turn regulated by the 26S proteasome in a negative feedback control mechanism; RPN4 is transcriptionally regulated by various stress responses                                                                                                                                                                                                                                                       |
| CAGL0B03685g |               | 1,82 | 1,59E-04 | <i>YCP4</i>    | Protein of unknown function, has sequence and structural similarity to flavodoxins; predicted to be palmitoylated; the authentic, non-tagged protein is detected in highly purified mitochondria in high-throughput studies                                                                                                                                                                                                                                                                   |
| CAGL0L10186g |               | 1,80 | 7,40E-05 | <i>YOR052C</i> | Nuclear protein of unknown function; expression induced by nitrogen limitation in a GLN3, GAT1-independent manner and by weak acid; transcriptionally regulated by Rpn4p along with proteasome subunit genes; putative ortholog of human AIRAP, which stimulates proteasome activity in response to arsenic                                                                                                                                                                                   |
| CAGL0M05995g |               | 1,80 | 1,59E-04 | <i>PET10</i>   | Protein of unknown function that co-purifies with lipid particles; expression pattern suggests a role in respiratory growth; computational analysis of large-scale protein-protein interaction data suggests a role in ATP/ADP exchange                                                                                                                                                                                                                                                       |
| CAGL0A01782g | <i>CgHXT4</i> | 1,80 | 9,72E-04 | <i>HXT4</i>    | High-affinity glucose transporter of the major facilitator superfamily, expression is induced by low levels of glucose and repressed by high levels of glucose                                                                                                                                                                                                                                                                                                                                |
| CAGL0G05830g |               | 1,79 | 1,27E-04 | <i>CRP1</i>    | Protein that binds to cruciform DNA structures                                                                                                                                                                                                                                                                                                                                                                                                                                                |
| CAGL0K07205g |               | 1,79 | 3,61E-04 | <i>YGL117W</i> | Putative protein of unknown function                                                                                                                                                                                                                                                                                                                                                                                                                                                          |
| CAGL0L07920g |               | 1,78 | 4,89E-04 | <i>PET18</i>   | Protein of unknown function, has weak similarity to proteins involved in thiamin metabolism; expression is induced in the absence of thiamin                                                                                                                                                                                                                                                                                                                                                  |

|              |                  |      |          |                  |                                                                                                                                                                                                                                                                                                                                                                                                                                                                                             |
|--------------|------------------|------|----------|------------------|---------------------------------------------------------------------------------------------------------------------------------------------------------------------------------------------------------------------------------------------------------------------------------------------------------------------------------------------------------------------------------------------------------------------------------------------------------------------------------------------|
| CAGL0E03674g | <i>CgTPO1_1</i>  | 1,78 | 1,40E-04 | <i>TPO1</i>      | Polyamine transporter that recognizes spermine, putrescine, and spermidine; catalyzes uptake of polyamines at alkaline pH and excretion at acidic pH; phosphorylation enhances activity and sorting to the plasma membrane                                                                                                                                                                                                                                                                  |
| CAGL0H02387g |                  | 1,78 | 1,38E-04 | <i>TPS3</i>      | Regulatory subunit of trehalose-6-phosphate synthase/phosphatase complex, which synthesizes the storage carbohydrate trehalose; expression is induced by stress conditions and repressed by the Ras-cAMP pathway                                                                                                                                                                                                                                                                            |
| CAGL0G02101g | <i>CgECM4</i>    | 1,77 | 1,19E-04 | <i>ECM4</i>      | Omega class glutathione transferase; not essential; similar to Ygr154cp; green fluorescent protein (GFP)-fusion protein localizes to the cytoplasm                                                                                                                                                                                                                                                                                                                                          |
| CAGL0K02101g |                  | 1,76 | 1,17E-04 | <i>PMD1</i>      | Protein with an N-terminal kelch-like domain, putative negative regulator of early meiotic gene expression; required, with Mds3p, for growth under alkaline conditions                                                                                                                                                                                                                                                                                                                      |
| CAGL0F03267g |                  | 1,76 | 1,01E-04 | <i>YHR080C</i>   | Protein of unknown function that may interact with ribosomes, based on co-purification experiments; the authentic, non-tagged protein is detected in highly purified mitochondria in high-throughput studies                                                                                                                                                                                                                                                                                |
| CAGL0F09273g |                  | 1,75 | 1,92E-04 | -                | Putative adhesin-like protein                                                                                                                                                                                                                                                                                                                                                                                                                                                               |
| CAGL0B00264g | <i>HMLALPHA2</i> | 1,75 | 7,35E-04 | <i>HMLALPHA2</i> | Silenced copy of ALPHA2 at HML; homeobox-domain protein that associates with Mcm1p in haploid cells to repress a-specific gene expression and interacts with a1p in diploid cells to repress haploid-specific gene expression                                                                                                                                                                                                                                                               |
| CAGL0K03707g |                  | 1,75 | 7,43E-04 | <i>YMR124W</i>   | Protein of unknown function; GFP-fusion protein localizes to the cell periphery, cytoplasm, bud, and bud neck; interacts with Crm1p in two-hybrid assay; YMR124W is not an essential gene; predicted to have a role in organelle organization                                                                                                                                                                                                                                               |
| CAGL0K01683g | <i>CgGPD1</i>    | 1,74 | 4,43E-04 | <i>GPD1</i>      | NAD-dependent glycerol-3-phosphate dehydrogenase, key enzyme of glycerol synthesis, essential for growth under osmotic stress; expression regulated by high-osmolarity glycerol response pathway; homolog of Gpd2p                                                                                                                                                                                                                                                                          |
| CAGL0B03817g |                  | 1,74 | 1,53E-03 | <i>MHO1</i>      | Protein of unknown function; inhibits haploid invasive growth when overexpressed; synthetically lethal with phospholipase C (PLC1); expression induced by mild heat stress on a non-fermentable carbon source, upon entry into stationary phase and upon nitrogen deprivation; repressed by inosine and choline in an Opi1p-dependent manner; highly conserved from bacteria to human; Memo, the human homolog, is an ErbB2 interacting protein with an essential function in cell motility |
| CAGL0G09977g | <i>CgGDB1</i>    | 1,74 | 4,65E-04 | <i>GDB1</i>      | Glycogen debranching enzyme containing glucanotransferase and alpha-1,6-amyloglucosidase activities, required for glycogen degradation; phosphorylated in mitochondria; activity is inhibited by Igd1p                                                                                                                                                                                                                                                                                      |
| CAGL0K05665g |                  | 1,73 | 1,02E-04 | -                | Has domain(s) with predicted catalytic activity, pyridoxal phosphate binding activity                                                                                                                                                                                                                                                                                                                                                                                                       |
| CAGL0B04917g |                  | 1,73 | 5,50E-04 | <i>IDP2</i>      | Cytosolic NADP-specific isocitrate dehydrogenase, catalyzes oxidation of isocitrate to alpha-ketoglutarate; levels are elevated during growth on non-fermentable carbon sources and reduced during growth on glucose                                                                                                                                                                                                                                                                        |
| CAGL0M03245g |                  | 1,73 | 3,05E-04 | <i>YELO20C</i>   | Protein of unknown function with low sequence identity to Pdc1p; mRNA identified as translated by ribosome profiling data                                                                                                                                                                                                                                                                                                                                                                   |
| CAGL0M04807g | <i>CgSNF2</i>    | 1,73 | 1,79E-04 | <i>SNF2</i>      | Catalytic subunit of the SWI/SNF chromatin remodeling complex involved in transcriptional regulation; contains DNA-stimulated ATPase activity; functions interdependently in transcriptional activation with Snf5p and Snf6p                                                                                                                                                                                                                                                                |
| CAGL0M06765g |                  | 1,73 | 3,14E-04 | <i>SIW14</i>     | Tyrosine phosphatase that plays a role in actin filament organization and endocytosis; localized to the cytoplasm                                                                                                                                                                                                                                                                                                                                                                           |
| CAGL0G08888g |                  | 1,73 | 9,56E-05 | <i>CSM2</i>      | Component of the Shu complex, which promotes error-free DNA repair; Shu complex mediates inhibition of Srs2p function; structural analysis reveals a similar DNA-binding region in both Psy3p and Csm2p and that both regions work together to form a single DNA binding site; required for accurate chromosome segregation during meiosis                                                                                                                                                  |
| CAGL0G06842g |                  | 1,72 | 1,34E-04 | <i>BBC1</i>      | Protein possibly involved in assembly of actin patches; interacts with an actin assembly factor Las17p and with the SH3 domains of Type I myosin Myo3p and Myo5p; localized predominantly to cortical actin patches                                                                                                                                                                                                                                                                         |
| CAGL0J08074g |                  | 1,72 | 1,97E-04 | <i>PDR17</i>     | Phosphatidylinositol transfer protein (PITP), downregulates Plb1p-mediated turnover of phosphatidylcholine, found in the cytosol and microsomes, homologous to Pdr16p, deletion affects phospholipid composition                                                                                                                                                                                                                                                                            |
| CAGL0E05610g |                  | 1,72 | 4,61E-03 | <i>PYK2</i>      | Pyruvate kinase that appears to be modulated by phosphorylation; PYK2 transcription is repressed by glucose, and Pyk2p may be active under low glycolytic flux                                                                                                                                                                                                                                                                                                                              |
| CAGL0J03960g |                  | 1,71 | 2,23E-04 | <i>WTM2</i>      | Transcriptional modulator involved in regulation of meiosis, silencing, and expression of RNR genes; involved in response to replication stress; contains WD repeats                                                                                                                                                                                                                                                                                                                        |
| CAGL0J08316g |                  | 1,71 | 5,43E-03 | <i>MET2</i>      | L-homoserine-O-acetyltransferase, catalyzes the conversion of homoserine to O-acetyl homoserine which is the first step of the methionine biosynthetic pathway                                                                                                                                                                                                                                                                                                                              |
| CAGL0J07502g |                  | 1,71 | 3,75E-04 | <i>YNL234W</i>   | Protein of unknown function with similarity to globins; has a functional heme-binding domain; mutant has aneuploidy tolerance; transcription induced by stress conditions; may be involved in glucose signaling or metabolism; regulated by Rgt1                                                                                                                                                                                                                                            |
| CAGL0C01551g |                  | 1,70 | 3,49E-04 | <i>CUP9</i>      | Homeodomain-containing transcriptional repressor of PTR2, which encodes a major peptide transporter; imported peptides activate ubiquitin-dependent proteolysis, resulting in degradation of Cup9p and de-repression of PTR2 transcription                                                                                                                                                                                                                                                  |
| CAGL0F07821g |                  | 1,70 | 2,22E-04 | <i>HUL5</i>      | Multiubiquitin chain assembly factor (E4); proteasome processivity factor that elongates polyUb chains on substrates, opposing Ubp6p, a branched polyubiquitin protease; required for retrograde transport of misfolded proteins during ERAD                                                                                                                                                                                                                                                |
| CAGL0H05379g |                  | 1,69 | 4,13E-04 | <i>GCR1</i>      | Transcriptional activator of genes involved in glycolysis; DNA-binding protein that interacts and functions with the transcriptional activator Gcr2p                                                                                                                                                                                                                                                                                                                                        |
| CAGL0G01540g | <i>CgNCE103</i>  | 1,69 | 2,42E-03 | <i>NCE103</i>    | Carbonic anhydrase; metalloenzyme that catalyzes CO2 hydration to bicarbonate, which is an important metabolic substrate, and protons; not expressed under conditions of high CO2, such as inside a growing colony, but transcription is induced in response to low CO2 levels, such as on the colony surface in ambient air; poorly transcribed under aerobic conditions and at an undetectable level under anaerobic conditions; mutation affects non-classical protein export pathway    |
| CAGL0H10164g |                  | 1,69 | 1,45E-03 | <i>MUM2</i>      | Cytoplasmic protein essential for meiotic DNA replication and sporulation; interacts with Orc2p, which is a component of the origin recognition complex                                                                                                                                                                                                                                                                                                                                     |
| CAGL0M02915g |                  | 1,69 | 5,89E-04 | <i>ATG36</i>     | Pex3p interacting protein, required for pexophagy; interacts with Atg8p and Atg11p; mRNA is weakly cell cycle regulated, peaking in G2 phase; YJL185C is a non-essential gene                                                                                                                                                                                                                                                                                                               |
| CAGL0G09449g |                  | 1,69 | 1,46E-04 | <i>CRH1</i>      | Chitin transglycosylase that functions in the transfer of chitin to beta(1-6) and beta(1-3) glucans in the cell wall; similar and functionally redundant to Utr2; localizes to sites of polarized growth; expression induced by cell wall stress                                                                                                                                                                                                                                            |
| CAGL0L05016g |                  | 1,68 | 4,26E-04 | <i>STB6</i>      | Protein that binds Sin3p in a two-hybrid assay                                                                                                                                                                                                                                                                                                                                                                                                                                              |
| CAGL0L06446g |                  | 1,68 | 2,12E-03 | <i>YDR132C</i>   | Putative protein of unknown function                                                                                                                                                                                                                                                                                                                                                                                                                                                        |
| CAGL0B01265g | <i>MATALPHA2</i> | 1,68 | 1,37E-03 | <i>MATALPHA2</i> | Homeobox-domain protein that, with Mcm1p, represses a-specific genes in haploids; acts with A1p to repress transcription of haploid-specific genes in diploids; one of two genes encoded by the MATAlpha mating type cassette                                                                                                                                                                                                                                                               |
| CAGL0E04548g |                  | 1,67 | 4,65E-04 | <i>YOR020W-A</i> | Putative protein of unknown function, conserved in <i>A. gossypii</i> ; the authentic, non-tagged protein is detected in highly purified mitochondria in high-throughput studies                                                                                                                                                                                                                                                                                                            |



|              |                 |      |          |                  |                                                                                                                                                                                                                                                                                                                                                                                                                                                                                    |
|--------------|-----------------|------|----------|------------------|------------------------------------------------------------------------------------------------------------------------------------------------------------------------------------------------------------------------------------------------------------------------------------------------------------------------------------------------------------------------------------------------------------------------------------------------------------------------------------|
| CAGLOH10626g | <i>CgAWP13</i>  | 1,67 | 4,53E-04 | NA               | NA                                                                                                                                                                                                                                                                                                                                                                                                                                                                                 |
| CAGLOL06006g |                 | 1,67 | 2,54E-04 | <i>ATG1</i>      | Protein ser/thr kinase required for vesicle formation in autophagy and the cytoplasm-to-vacuole targeting (Cvt) pathway; structurally required for phagophore assembly site formation; during autophagy forms a complex with Atg13p and Atg17p                                                                                                                                                                                                                                     |
| CAGLOJ11176g |                 | 1,67 | 1,60E-04 | <i>TDA7</i>      | Cell cycle-regulated gene of unknown function, promoter bound by Fkh2p; null mutant is sensitive to expression of the top1-T722A allele                                                                                                                                                                                                                                                                                                                                            |
| CAGLOM01716g |                 | 1,66 | 6,80E-03 | <i>TEC1</i>      | Transcription factor targeting filamentation genes and Ty1 expression; Ste12p activation of most filamentation gene promoters depends on Tec1p and Tec1p transcriptional activity is dependent on its association with Ste12p; binds to TCS elements upstream of filamentation genes, which are regulated by Tec1p/Ste12p/Dig1p complex; competes with Dig2p for binding to Ste12p/Dig1p; positive regulator of chronological life span; TEA/ATTS DNA-binding domain family member |
| CAGLOK08338g |                 | 1,65 | 1,16E-03 | -                | Unknown                                                                                                                                                                                                                                                                                                                                                                                                                                                                            |
| CAGLOL06776g |                 | 1,65 | 6,12E-04 | <i>GAT2</i>      | Protein containing GATA family zinc finger motifs; similar to Gln3p and Dal80p; expression repressed by leucine                                                                                                                                                                                                                                                                                                                                                                    |
| CAGLOD04752g |                 | 1,65 | 1,90E-04 | <i>YPR127W</i>   | Protein of unknown function, differentially expressed during alcoholic fermentation; expression activated by transcription factor YRM1/YOR172W; green fluorescent protein (GFP)-fusion protein localizes to both the cytoplasm and the nucleus                                                                                                                                                                                                                                     |
| CAGLOC02365g |                 | 1,64 | 1,65E-03 | -                | Unknown                                                                                                                                                                                                                                                                                                                                                                                                                                                                            |
| CAGLOI05698g |                 | 1,64 | 1,45E-04 | <i>PFK2</i>      | Beta subunit of heterooctameric phosphofructokinase involved in glycolysis, indispensable for anaerobic growth, activated by fructose-2,6-bisphosphate and AMP, mutation inhibits glucose induction of cell cycle-related genes                                                                                                                                                                                                                                                    |
| CAGLOC03597g | <i>CgABP1</i>   | 1,64 | 4,05E-04 | <i>ABP1</i>      | Actin-binding protein of the cortical actin cytoskeleton, important for activation of the Arp2/3 complex that plays a key role actin in cytoskeleton organization; phosphorylation within its PRR (Proline-Rich Region), mediated by Cdc28p and Pho85p, protects Abp1p from proteolysis mediated by its own PEST sequences                                                                                                                                                         |
| CAGLOF02101g |                 | 1,64 | 2,81E-04 | <i>BLM10</i>     | Proteasome activator; binds the core proteasome and stimulates proteasome-mediated protein degradation by inducing gate opening; required for resistance to bleomycin, may be involved in protecting against oxidative damage; similar to mammalian PA200                                                                                                                                                                                                                          |
| CAGLOL11990g |                 | 1,63 | 1,07E-03 | <i>GRX4</i>      | Hydroperoxide and superoxide-radical responsive glutathione-dependent oxidoreductase; monothiol glutaredoxin subfamily member along with Grx3p and Grx5p; protects cells from oxidative damage; mutant has increased aneuploidy tolerance; transcription is regulated by Yap5                                                                                                                                                                                                      |
| CAGLOF03003g |                 | 1,62 | 1,02E-03 | <i>HKR1</i>      | Mucin family member that functions as an osmosensor in the Sho1p-mediated HOG pathway with Msb2p; proposed to be a negative regulator of filamentous growth; mutant displays defects in beta-1,3 glucan synthesis and bud site selection                                                                                                                                                                                                                                           |
| CAGLOB00594g |                 | 1,62 | 2,85E-04 | <i>YCLO48W-A</i> | Putative protein of unknown function                                                                                                                                                                                                                                                                                                                                                                                                                                               |
| CAGLOL02453g |                 | 1,61 | 6,66E-04 | <i>MIT1</i>      | Transcriptional regulator of pseudohyphal growth; protein with sequence similarity to <i>S. pombe</i> gti1+ (gluconate transport inducer 1) and <i>C. albicans</i> Wor1                                                                                                                                                                                                                                                                                                            |
| CAGLOM10439g |                 | 1,61 | 2,27E-03 | <i>NTH1</i>      | Neutral trehalase, degrades trehalose; required for thermotolerance and may mediate resistance to other cellular stresses; may be phosphorylated by Cdc28p                                                                                                                                                                                                                                                                                                                         |
| CAGLOE03025g |                 | 1,60 | 2,02E-04 | <i>ECL1</i>      | Protein of unknown function, affects chronological lifespan; induced by iron homeostasis transcription factor Aft2p; multicopy suppressor of temperature sensitive <i>hsf1</i> mutant; induced by treatment with 8-methoxypsoralen and UVA irradiation                                                                                                                                                                                                                             |
| CAGLOF07601g | <i>CgCWP1_1</i> | 1,59 | 1,65E-03 | <i>CWP2</i>      | Covalently linked cell wall mannoprotein, major constituent of the cell wall; plays a role in stabilizing the cell wall; involved in low pH resistance; precursor is GPI-anchored                                                                                                                                                                                                                                                                                                  |
| CAGLOG08712g |                 | 1,59 | 7,42E-04 | <i>KGD1</i>      | Component of the mitochondrial alpha-ketoglutarate dehydrogenase complex, which catalyzes a key step in the tricarboxylic acid (TCA) cycle, the oxidative decarboxylation of alpha-ketoglutarate to form succinyl-CoA                                                                                                                                                                                                                                                              |
| CAGLOH10120g |                 | 1,59 | 2,03E-03 | <i>YBR056W</i>   | Putative cytoplasmic protein of unknown function                                                                                                                                                                                                                                                                                                                                                                                                                                   |
| CAGLOM01364g | <i>CgCBF3D</i>  | 1,58 | 6,01E-03 | <i>SKP1</i>      | Evolutionarily conserved kinetochore protein that is part of multiple protein complexes, including the SCF ubiquitin ligase complex, the CBF3 complex that binds centromeric DNA, and the RAVE complex that regulates assembly of the V-ATPase                                                                                                                                                                                                                                     |
| CAGLOL03157g |                 | 1,58 | 9,40E-04 | <i>DAL80</i>     | Negative regulator of genes in multiple nitrogen degradation pathways; expression is regulated by nitrogen levels and by Gln3p; member of the GATA-binding family, forms homodimers and heterodimers with Deh1p                                                                                                                                                                                                                                                                    |
| CAGLOF00187g |                 | 1,57 | 9,49E-04 | <i>FET4</i>      | Low-affinity Fe(II) transporter of the plasma membrane                                                                                                                                                                                                                                                                                                                                                                                                                             |
| CAGLOC05027g |                 | 1,57 | 2,72E-04 | <i>YAT1</i>      | Outer mitochondrial carnitine acetyltransferase, minor ethanol-inducible enzyme involved in transport of activated acyl groups from the cytoplasm into the mitochondrial matrix; phosphorylated                                                                                                                                                                                                                                                                                    |
| CAGLOE05170g | <i>CgGRE2</i>   | 1,57 | 1,95E-03 | -                | Putative methylglyoxal reductase (NADPH-dependent)                                                                                                                                                                                                                                                                                                                                                                                                                                 |
| CAGLOF07579g | <i>CgCWP1_2</i> | 1,57 | 1,66E-03 | <i>CWP1</i>      | Cell wall mannoprotein that localizes specifically to birth scars of daughter cells, linked to a beta-1,3- and beta-1,6-glucan heteropolymer through a phosphodiester bond; required for propionic acid resistance                                                                                                                                                                                                                                                                 |
| CAGLOE01529g |                 | 1,56 | 4,61E-04 | <i>PFK27</i>     | 6-phosphofructo-2-kinase, catalyzes synthesis of fructose-2,6-bisphosphate; inhibited by phosphoenolpyruvate and sn-glycerol 3-phosphate, expression induced by glucose and sucrose, transcriptional regulation involves protein kinase A                                                                                                                                                                                                                                          |
| CAGLOM04191g | <i>CgYPS1</i>   | 1,56 | 2,19E-03 | <i>YPS1</i>      | Aspartic protease, member of the yapsin family of proteases involved in cell wall growth and maintenance; attached to the plasma membrane via a glycosylphosphatidylinositol (GPI) anchor                                                                                                                                                                                                                                                                                          |
| CAGLOI09009g |                 | 1,55 | 1,08E-03 | <i>HIS2</i>      | Histidinolphosphatase, catalyzes the eighth step in histidine biosynthesis; mutations cause histidine auxotrophy and sensitivity to Cu, Co, and Ni salts; transcription is regulated by general amino acid control                                                                                                                                                                                                                                                                 |
| CAGLOJ01870g |                 | 1,55 | 3,05E-04 | <i>PMR1</i>      | High affinity Ca <sup>2+</sup> /Mn <sup>2+</sup> P-type ATPase required for Ca <sup>2+</sup> and Mn <sup>2+</sup> transport into Golgi; involved in Ca <sup>2+</sup> dependent protein sorting and processing; mutations in human homolog ATP2C1 cause acantholytic skin condition Hailey-Hailey disease                                                                                                                                                                           |
| CAGLOE05808g | <i>CgTH16</i>   | 1,54 | 5,72E-04 | <i>TH16</i>      | Bifunctional enzyme with thiamine-phosphate pyrophosphorylase and 4-methyl-5-beta-hydroxyethylthiazole kinase activities, required for thiamine biosynthesis; GFP-fusion protein localizes to the cytoplasm in a punctate pattern                                                                                                                                                                                                                                                  |
| CAGLOF04125g |                 | 1,54 | 2,46E-03 | <i>YBL029W</i>   | Non-essential protein of unknown function                                                                                                                                                                                                                                                                                                                                                                                                                                          |
| CAGLOI10747g |                 | 1,54 | 4,48E-04 | <i>MEP1</i>      | Ammonium permease; belongs to a ubiquitous family of cytoplasmic membrane proteins that transport only ammonium (NH <sub>4</sub> <sup>+</sup> ); expression is under the nitrogen catabolite repression regulation                                                                                                                                                                                                                                                                 |
| CAGLOH02541g |                 | 1,53 | 1,09E-03 | <i>YMR252C</i>   | Putative protein of unknown function; green fluorescent protein (GFP)-fusion protein localizes to mitochondria; YMR252C is not an essential gene                                                                                                                                                                                                                                                                                                                                   |
| CAGLOL08074g |                 | 1,53 | 4,84E-04 | <i>SYP1</i>      | Protein of unknown function that is involved in endocytic site formation; may regulate assembly and disassembly of the septin ring; colocalizes and interacts with septin subunits; potential role in actin cytoskeletal organization                                                                                                                                                                                                                                              |

|              |                |      |          |                |                                                                                                                                                                                                                                                                                          |
|--------------|----------------|------|----------|----------------|------------------------------------------------------------------------------------------------------------------------------------------------------------------------------------------------------------------------------------------------------------------------------------------|
| CAGL0B02860g |                | 1,53 | 2,78E-03 | <i>ATG33</i>   | Mitochondrial mitophagy-specific protein; required primarily for mitophagy induced at the post-log phase; not required for other types of selective autophagy or macroautophagy; conserved within fungi, but not in higher eukaryotes                                                    |
| CAGL0M00132g | <i>CgEPA12</i> | 1,52 | 1,58E-03 | -              | Putative adhesin-like cell wall protein                                                                                                                                                                                                                                                  |
| CAGL0C03113g |                | 1,52 | 7,59E-04 | <i>DCS1</i>    | Non-essential hydrolase involved in mRNA decapping; activates Xrn1p; may function in a feedback mechanism to regulate deadenylation, contains pyrophosphatase activity and a HIT (histidine triad) motif; interacts with neutral trehalase Nth1p; required for growth on glycerol medium |
| CAGL0L10912g |                | 1,51 | 8,34E-04 | <i>TPO4</i>    | Polyamine transport protein, recognizes spermine, putrescine, and spermidine; localizes to the plasma membrane; member of the major facilitator superfamily                                                                                                                              |
| CAGL0E03740g |                | 1,51 | 5,76E-04 | <i>YHL026C</i> | Putative protein of unknown function; transcriptionally regulated by Upc2p via an upstream sterol response element; YHL026C is not an essential gene; in 2005 the start site was moved 141 nt upstream (see Locus History)                                                               |
| CAGL0L03916g |                | 1,50 | 1,12E-03 | <i>AZF1</i>    | Zinc-finger transcription factor, involved in induction of CLN3 transcription in response to glucose; genetic and physical interactions indicate a possible role in mitochondrial transcription or genome maintenance                                                                    |
| CAGL0A03212g |                | 1,50 | 1,07E-03 | <i>ATO3</i>    | Plasma membrane protein, regulation pattern suggests a possible role in export of ammonia from the cell; phosphorylated in mitochondria; member of the TC 9.B.33 YaaH family of putative transporters                                                                                    |
| CAGL0B01595g |                | 1,49 | 5,42E-04 | -              | Unknown                                                                                                                                                                                                                                                                                  |
| CAGL0M10153g |                | 1,49 | 1,53E-03 | <i>STE20</i>   | Cdc42p-activated signal transducing kinase of the PAK (p21-activated kinase) family; involved in pheromone response, pseudohyphal/invasive growth, vacuole inheritance, down-regulation of sterol uptake; GBB motif binds Ste4p                                                          |
| CAGL0F02519g |                | 1,48 | 3,99E-04 | <i>YJL206C</i> | Putative protein of unknown function; similar to transcriptional regulators from the Zn[2]-Cys[6] binuclear cluster protein family; mRNA is weakly cell cycle regulated, peaking in S phase; induced rapidly upon MMS treatment                                                          |
| CAGL0B04895g |                | 1,48 | 1,81E-03 | <i>RFX1</i>    | Major transcriptional repressor of DNA-damage-regulated genes, recruits repressors Tup1p and Cyc8p to their promoters; involved in DNA damage and replication checkpoint pathway; similar to a family of mammalian DNA binding RFX1-4 proteins                                           |
| CAGL0K12078g |                | 1,48 | 4,33E-04 | <i>NRG1</i>    | Transcriptional repressor that recruits the Cyc8p-Tup1p complex to promoters; mediates glucose repression and negatively regulates a variety of processes including filamentous growth and alkaline pH response                                                                          |
| CAGL0L09273g |                | 1,48 | 7,20E-04 | <i>ICL2</i>    | 2-methylisocitrate lyase of the mitochondrial matrix, functions in the methylcitrate cycle to catalyze the conversion of 2-methylisocitrate to succinate and pyruvate; ICL2 transcription is repressed by glucose and induced by ethanol                                                 |
| CAGL0A02145g |                | 1,47 | 2,80E-03 | <i>YSC84</i>   | Actin-binding protein involved in bundling of actin filaments and endocytosis of actin cortical patches; activity stimulated by Las17p; contains SH3 domain similar to Rvs167p                                                                                                           |
| CAGL0D06424g | <i>CgACO1</i>  | 1,47 | 5,10E-04 | <i>ACO1</i>    | Aconitase, required for the tricarboxylic acid (TCA) cycle and also independently required for mitochondrial genome maintenance; phosphorylated; component of the mitochondrial nucleoid; mutation leads to glutamate auxotrophy                                                         |
| CAGL0K10824g |                | 1,47 | 9,43E-04 | <i>YLR149C</i> | Putative protein of unknown function; overexpression causes a cell cycle delay or arrest; null mutation results in a decrease in plasma membrane electron transport; YLR149C is not an essential gene                                                                                    |
| CAGL0C04213g |                | 1,47 | 6,20E-04 | <i>RCR1</i>    | Protein of the ER membrane involved in cell wall chitin deposition; may function in the endosomal-vacuolar trafficking pathway, helping determine whether plasma membrane proteins are degraded or routed to the plasma membrane                                                         |
| CAGL0C04587g |                | 1,47 | 1,41E-03 | <i>YJR098C</i> | Putative protein of unknown function; the authentic, non-tagged protein is detected in highly purified mitochondria in high-throughput studies                                                                                                                                           |
| CAGL0D02948g | <i>CgKAR2</i>  | 1,46 | 1,18E-03 | <i>KAR2</i>    | ATPase involved in protein import into the ER, also acts as a chaperone to mediate protein folding in the ER and may play a role in ER export of soluble proteins; regulates the unfolded protein response via interaction with Ire1p                                                    |
| CAGL0E00319g |                | 1,46 | 1,84E-03 | -              | Unknown                                                                                                                                                                                                                                                                                  |
| CAGL0H07997g | <i>CgKNH1</i>  | 1,46 | 9,47E-04 | <i>KNH1</i>    | Protein with similarity to Kre9p, which is involved in cell wall beta 1,6-glucan synthesis; overproduction suppresses growth defects of a kre9 null mutant; required for propionic acid resistance                                                                                       |
| CAGL0H09966g |                | 1,46 | 9,24E-04 | <i>FMP23</i>   | Putative protein of unknown function; proposed to be involved in iron or copper homeostasis; the authentic, non-tagged protein is detected in highly purified mitochondria in high-throughput studies                                                                                    |
| CAGL0I04180g | <i>CgAMT1</i>  | 1,46 | 1,30E-03 | <i>CUP2</i>    | Copper-binding transcription factor; activates transcription of the metallothionein genes CUP1-1 and CUP1-2 in response to elevated copper concentrations                                                                                                                                |
| CAGL0E04004g |                | 1,46 | 5,01E-03 | <i>MUP3</i>    | Low affinity methionine permease, similar to Mup1p                                                                                                                                                                                                                                       |
| CAGL0H10054g |                | 1,46 | 3,46E-03 | <i>YBR053C</i> | Putative protein of unknown function; induced by cell wall perturbation                                                                                                                                                                                                                  |
| CAGL0M03157g |                | 1,46 | 4,12E-03 | <i>IRS4</i>    | EH domain-containing protein involved in regulating phosphatidylinositol 4,5-bisphosphate levels and autophagy; Irs4p and Tax4p bind and activate the PtdIns phosphatase Inp51p; Irs4p and Tax4p are involved in localizing Atg17p to the PAS                                            |
| CAGL0B02431g |                | 1,45 | 1,71E-03 | <i>NDI1</i>    | NADH:ubiquinone oxidoreductase, transfers electrons from NADH to ubiquinone in the respiratory chain but does not pump protons, in contrast to the higher eukaryotic multisubunit respiratory complex I; phosphorylated; homolog of human AMID                                           |
| CAGL0A03718g |                | 1,45 | 8,46E-04 | <i>CHC1</i>    | Clathrin heavy chain, subunit of the major coat protein involved in intracellular protein transport and endocytosis; two heavy chains form the clathrin triskelion structural component; the light chain (CLC1) is thought to regulate function                                          |
| CAGL0K08624g |                | 1,45 | 1,19E-03 | <i>HAP4</i>    | Subunit of the heme-activated, glucose-repressed Hap2p/3p/4p/5p CCAAT-binding complex, a transcriptional activator and global regulator of respiratory gene expression; provides the principal activation function of the complex                                                        |
| CAGL0M09449g | <i>CgCRH1</i>  | 1,44 | 5,78E-04 | <i>ECM21</i>   | Protein involved in regulating the endocytosis of plasma membrane proteins; identified as a substrate for ubiquitination by Rsp5p and deubiquitination by Ubp2p; promoter contains several Gcn4p binding elements                                                                        |
| CAGL0I02530g |                | 1,43 | 9,86E-04 | <i>FMO1</i>    | Flavin-containing monooxygenase, localized to the cytoplasmic face of the ER membrane; catalyzes oxidation of biological thiols to maintain the ER redox buffer ratio for correct folding of disulfide-bonded proteins                                                                   |
| CAGL0I05522g |                | 1,43 | 4,19E-03 | <i>UBP9</i>    | Ubiquitin carboxyl-terminal hydrolase, ubiquitin-specific protease that cleaves ubiquitin-protein fusions                                                                                                                                                                                |
| CAGL0G09295g |                | 1,43 | 8,15E-04 | <i>FYV8</i>    | Protein of unknown function, required for survival upon exposure to K1 killer toxin                                                                                                                                                                                                      |
| CAGL0M02211g | <i>CgPEP4</i>  | 1,43 | 9,74E-03 | <i>PEP4</i>    | Vacuolar aspartyl protease (proteinase A), required for the posttranslational precursor maturation of vacuolar proteinases; important for protein turnover after oxidative damage; synthesized as a zymogen, self-activates                                                              |

|              |                |      |          |                  |                                                                                                                                                                                                                                                                                                                                                                                                                                                                                              |
|--------------|----------------|------|----------|------------------|----------------------------------------------------------------------------------------------------------------------------------------------------------------------------------------------------------------------------------------------------------------------------------------------------------------------------------------------------------------------------------------------------------------------------------------------------------------------------------------------|
| CAGL0L01177g | <i>CgFRSD1</i> | 1,43 | 1,88E-03 | <i>YEL047C</i>   | Soluble fumarate reductase, required with isoenzyme Osm1p for anaerobic growth; may interact with ribosomes, based on co-purification experiments; authentic, non-tagged protein is detected in purified mitochondria in high-throughput studies                                                                                                                                                                                                                                             |
| CAGL0H08173g |                | 1,43 | 7,93E-03 | -                | Unknown                                                                                                                                                                                                                                                                                                                                                                                                                                                                                      |
| CAGL0J11968g | <i>CgEPA15</i> | 1,42 | 1,15E-03 | -                | Putative adhesin-like cell wall protein                                                                                                                                                                                                                                                                                                                                                                                                                                                      |
| CAGL0A03872g |                | 1,42 | 3,66E-03 | <i>ENT2</i>      | Epsin-like protein required for endocytosis and actin patch assembly and functionally redundant with Ent1p; contains clathrin-binding motif at C-terminus                                                                                                                                                                                                                                                                                                                                    |
| CAGL0G09515g |                | 1,42 | 4,42E-04 | <i>SPR1</i>      | Sporulation-specific exo-1,3-beta-glucanase; contributes to ascospore thermoresistance                                                                                                                                                                                                                                                                                                                                                                                                       |
| CAGL0C03267g |                | 1,42 | 7,06E-04 | <i>FPS1</i>      | Plasma membrane channel, member of major intrinsic protein (MIP) family; involved in efflux of glycerol and in uptake of acetic acid and the trivalent metalloids arsenite and antimonite; phosphorylated by Hog1p MAPK under acetate stress                                                                                                                                                                                                                                                 |
| CAGL0I08305g |                | 1,42 | 8,14E-04 | <i>YAT2</i>      | Carnitine acetyltransferase; has similarity to Yat1p, which is a carnitine acetyltransferase associated with the mitochondrial outer membrane                                                                                                                                                                                                                                                                                                                                                |
| CAGL0M07612g |                | 1,41 | 1,91E-03 | <i>FMS1</i>      | Polyamine oxidase, converts spermine to spermidine, which is required for the essential hypusination modification of translation factor eIF-5A; also involved in pantothenic acid biosynthesis                                                                                                                                                                                                                                                                                               |
| CAGL0L03135g | <i>MFalpha</i> | 1,41 | 4,99E-04 | <i>SPO14</i>     | Phospholipase D; catalyzes the hydrolysis of phosphatidylcholine, producing choline and phosphatidic acid; involved in Sec14p-independent secretion; required for meiosis and spore formation; differently regulated in secretion and meiosis; participates in transcription initiation and/or early elongation of specific genes; interacts with foot domain of RNA polymerase II; deletion results in abnormal CTD-Ser5 phosphorylation of RNA polymerase II at specific promoter regions  |
| CAGL0J03058g |                | 1,41 | 7,25E-04 | <i>ICL1</i>      | Iso citrate lyase, catalyzes the formation of succinate and glyoxylate from isocitrate, a key reaction of the glyoxylate cycle; expression of ICL1 is induced by growth on ethanol and repressed by growth on glucose                                                                                                                                                                                                                                                                        |
| CAGL0F01793g | <i>CgERG3</i>  | 1,41 | 1,37E-03 | <i>ERG3</i>      | C-5 sterol desaturase, glycoprotein that catalyzes the introduction of a C-5(6) double bond into episterol, a precursor in ergosterol biosynthesis; mutants are viable, but cannot grow on non-fermentable carbon sources; substrate of the HRD ubiquitin ligase                                                                                                                                                                                                                             |
| CAGL0H05445g | <i>CgPGI1</i>  | 1,41 | 4,72E-03 | <i>PGI1</i>      | Glycolytic enzyme phosphoglucose isomerase, catalyzes the interconversion of glucose-6-phosphate and fructose-6-phosphate; required for cell cycle progression and completion of the gluconeogenic events of sporulation                                                                                                                                                                                                                                                                     |
| CAGL0M06963g |                | 1,41 | 3,61E-04 | <i>SOL2</i>      | Protein with a possible role in tRNA export; shows similarity to 6-phosphogluconolactonase non-catalytic domains but does not exhibit this enzymatic activity; homologous to Sol1p, Sol3p, and Sol4p                                                                                                                                                                                                                                                                                         |
| CAGL0M02101g |                | 1,41 | 3,70E-04 | <i>PET20</i>     | Mitochondrial protein, required for respiratory growth under some conditions and for stability of the mitochondrial genome                                                                                                                                                                                                                                                                                                                                                                   |
| CAGL0H04213g |                | 1,41 | 1,01E-03 | <i>TDA9</i>      | DNA-binding protein, putative transcription factor; green fluorescent protein (GFP)-fusion protein localizes to the nucleus; null mutant is sensitive to expression of the top1-T722A allele; not an essential gene                                                                                                                                                                                                                                                                          |
| CAGL0L00583g |                | 1,40 | 3,81E-03 | <i>USV1</i>      | Putative transcription factor containing a C2H2 zinc finger; mutation affects transcriptional regulation of genes involved in growth on non-fermentable carbon sources, response to salt stress and cell wall biosynthesis                                                                                                                                                                                                                                                                   |
| CAGL0G06006g |                | 1,40 | 2,73E-03 | <i>YHR138C</i>   | Putative protein of unknown function; has similarity to Pbi2p; double null mutant lacking Pbi2p and Yhr138p exhibits highly fragmented vacuoles                                                                                                                                                                                                                                                                                                                                              |
| CAGL0L08426g | <i>CgSUE1</i>  | 1,39 | 5,90E-04 | <i>SUE1</i>      | Mitochondrial protein required for degradation of unstable forms of cytochrome c                                                                                                                                                                                                                                                                                                                                                                                                             |
| CAGL0K01705g |                | 1,39 | 4,38E-04 | <i>GPM2</i>      | Homolog of Gpm1p phosphoglycerate mutase, which converts 3-phosphoglycerate to 2-phosphoglycerate in glycolysis; may be non-functional derivative of a gene duplication event                                                                                                                                                                                                                                                                                                                |
| CAGL0F04829g |                | 1,39 | 5,82E-04 | <i>PIN3</i>      | Protein that induces appearance of [PIN+] prion when overproduced                                                                                                                                                                                                                                                                                                                                                                                                                            |
| CAGL0H02893g |                | 1,39 | 5,14E-04 | <i>YJL070C</i>   | Protein of unknown function; some similarity to AMP deaminases but lacks key catalytic residues and does not rescue purine nucleotide metabolic defect of quadruple aah1 ade8 amd1 his1 mutant; may regulate purine nucleotide homeostasis as overexpression in an AMD1 strain grown in adenine results in greatly reduced GDP and GTP intracellular levels; the authentic, non-tagged protein is detected in highly purified mitochondria in high-throughput studies; not an essential gene |
| CAGL0G05357g |                | 1,39 | 1,06E-03 | <i>YNL200C</i>   | NADHX epimerase; catalyzes isomerization of (R)- and (S)-NADHX; homologous to AIBP in mammals and the N-terminal domain of YjeF in E.coli; enzyme is widespread in eukaryotes, prokaryotes and archaea; the authentic, non-tagged protein is detected in highly purified mitochondria in high-throughput studies                                                                                                                                                                             |
| CAGL0D04510g |                | 1,39 | 6,63E-04 | <i>YPR117W</i>   | Putative protein of unknown function                                                                                                                                                                                                                                                                                                                                                                                                                                                         |
| CAGL0I07227g |                | 1,38 | 6,48E-04 | <i>IDH2</i>      | Subunit of mitochondrial NAD(+)-dependent isocitrate dehydrogenase, which catalyzes the oxidation of isocitrate to alpha-ketoglutarate in the TCA cycle; phosphorylated                                                                                                                                                                                                                                                                                                                      |
| CAGL0G06798g |                | 1,38 | 6,06E-04 | <i>YJR005C-A</i> | Putative protein of unknown function, originally identified as a syntenic homolog of an <i>&lt;i&gt;Ashbya gossypii&lt;/i&gt;</i> gene                                                                                                                                                                                                                                                                                                                                                       |
| CAGL0B00704g | <i>CgPDI1</i>  | 1,38 | 7,58E-03 | <i>PDI1</i>      | Protein disulfide isomerase; multifunctional protein resident in the endoplasmic reticulum lumen, essential for the formation of disulfide bonds in secretory and cell-surface proteins, unscrambles non-native disulfide bonds; forms a complex with Mnl1p that has exomannosidase activity, processing unfolded protein-bound Man8GlcNAc2 oligosaccharides to Man7GlcNAc2 which promotes degradation in the unfolded protein response                                                      |
| CAGL0G02673g |                | 1,38 | 3,98E-04 | <i>IDH1</i>      | Subunit of mitochondrial NAD(+)-dependent isocitrate dehydrogenase, which catalyzes the oxidation of isocitrate to alpha-ketoglutarate in the TCA cycle                                                                                                                                                                                                                                                                                                                                      |
| CAGL0M04763g |                | 1,37 | 2,03E-03 | <i>YOR289W</i>   | Putative protein of unknown function; transcription induced by the unfolded protein response; green fluorescent protein (GFP)-fusion protein localizes to both the cytoplasm and the nucleus                                                                                                                                                                                                                                                                                                 |
| CAGL0M10571g |                | 1,37 | 4,91E-04 | <i>ARE2</i>      | Acyl-CoA:sterol acyltransferase, isozyme of Are1p; endoplasmic reticulum enzyme that contributes the major sterol esterification activity in the presence of oxygen                                                                                                                                                                                                                                                                                                                          |
| CAGL0B03421g |                | 1,37 | 1,13E-03 | <i>HAP1</i>      | Zinc finger transcription factor involved in the complex regulation of gene expression in response to levels of heme and oxygen; the S288C sequence differs from other strain backgrounds due to a Ty1 insertion in the carboxy terminus                                                                                                                                                                                                                                                     |
| CAGL0D01980g |                | 1,37 | 5,62E-04 | <i>TGL1</i>      | Steryl ester hydrolase, one of three gene products (Yeh1p, Yeh2p, Tgl1p) responsible for steryl ester hydrolase activity and involved in sterol homeostasis; localized to lipid particle membranes                                                                                                                                                                                                                                                                                           |
| CAGL0G05962g |                | 1,37 | 9,68E-04 | <i>YHR140W</i>   | Putative integral membrane protein of unknown function                                                                                                                                                                                                                                                                                                                                                                                                                                       |
| CAGL0C03872g | <i>CgTIR3</i>  | 1,36 | 1,45E-03 | <i>TIR3</i>      | Cell wall mannoprotein of the Srp1p/Tip1p family of serine-alanine-rich proteins; expressed under anaerobic conditions and required for anaerobic growth                                                                                                                                                                                                                                                                                                                                     |
| CAGL0C03289g | <i>CgYBT1</i>  | 1,35 | 3,83E-03 | <i>YBT1</i>      | Transporter of the ATP-binding cassette (ABC) family involved in bile acid transport; similar to mammalian bile transporters                                                                                                                                                                                                                                                                                                                                                                 |
| CAGL0L09383g |                | 1,35 | 6,83E-03 | <i>SUT2</i>      | Putative transcription factor; multicopy suppressor of mutations that cause low activity of the cAMP/protein kinase A pathway; highly similar to Sut1p                                                                                                                                                                                                                                                                                                                                       |
| CAGL0E02651g |                | 1,35 | 1,97E-03 | <i>YSP3</i>      | Putative precursor to the subtilisin-like protease III                                                                                                                                                                                                                                                                                                                                                                                                                                       |

|              |               |      |          |                   |                                                                                                                                                                                                                                                                                                                                                                                       |
|--------------|---------------|------|----------|-------------------|---------------------------------------------------------------------------------------------------------------------------------------------------------------------------------------------------------------------------------------------------------------------------------------------------------------------------------------------------------------------------------------|
| CAGL0C01595g |               | 1,35 | 1,85E-03 | <i>HIS7</i>       | Imidazole glycerol phosphate synthase (glutamine amidotransferase:cyclase), catalyzes the fifth step of histidine biosynthesis and also produces 5-aminoimidazole-4-carboxamide ribotide (AICAR), a purine precursor                                                                                                                                                                  |
| CAGL0F04785g |               | 1,35 | 7,08E-03 | <i>VHS2</i>       | Cytoplasmic protein of unknown function; identified as a high-copy suppressor of the synthetic lethality of a <i>sis2 sit4</i> double mutant, suggesting a role in G1/S phase progression; similar to Mlf3p                                                                                                                                                                           |
| CAGL0J07876g |               | 1,34 | 7,45E-04 | <i>RTC4</i>       | Protein of unknown function; null mutation suppresses <i>cdc13-1</i> temperature sensitivity; (GFP)-fusion protein localizes to both the cytoplasm and the nucleus                                                                                                                                                                                                                    |
| CAGL0G06050g |               | 1,34 | 2,54E-03 | -                 | Unknown                                                                                                                                                                                                                                                                                                                                                                               |
| CAGL0A04081g |               | 1,34 | 4,25E-03 | <i>YLR194C</i>    | Structural constituent of the cell wall attached to the plasma membrane by a GPI-anchor; expression is upregulated in response to cell wall stress                                                                                                                                                                                                                                    |
| CAGL0M12947g | <i>CgPUP1</i> | 1,34 | 2,01E-03 | -                 | Mitochondria-localized protein                                                                                                                                                                                                                                                                                                                                                        |
| CAGL0G00858g |               | 1,33 | 9,95E-04 | <i>MID2</i>       | O-glycosylated plasma membrane protein that acts as a sensor for cell wall integrity signaling and activates the pathway; interacts with Rom2p, a guanine nucleotide exchange factor for Rho1p, and with cell integrity pathway protein Zeo1p                                                                                                                                         |
| CAGL0L04598g |               | 1,33 | 8,18E-04 | <i>DCS2</i>       | Non-essential, stress induced regulatory protein; modulates m7G-oligoribonucleotide metabolism; inhibits Dcs1p; regulated by Msn2p, Msn4p, and the Ras-cAMP-cAPK signaling pathway; mutant has increased aneuploidy tolerance                                                                                                                                                         |
| CAGL0J02948g | <i>CgFCY2</i> | 1,33 | 2,69E-03 | <i>FCY22</i>      | Putative purine-cytosine permease, very similar to Fcy2p but cannot substitute for its function                                                                                                                                                                                                                                                                                       |
| CAGL0L12892g |               | 1,33 | 6,37E-04 | <i>SFK1</i>       | Plasma membrane protein that may act together with or upstream of Stt4p to generate normal levels of the essential phospholipid PI4P, at least partially mediates proper localization of Stt4p to the plasma membrane                                                                                                                                                                 |
| CAGL0L10362g |               | 1,33 | 1,47E-03 | <i>YOR062C</i>    | Protein of unknown function; similar to YKR075Cp and Reg1p; expression regulated by glucose and Rgt1p; GFP-fusion protein is induced in response to the DNA-damaging agent MMS                                                                                                                                                                                                        |
| CAGL0J04004g |               | 1,33 | 1,30E-03 | <i>YOR228C</i>    | Protein of unknown function, localized to the mitochondrial outer membrane                                                                                                                                                                                                                                                                                                            |
| CAGL0L09251g |               | 1,32 | 1,18E-03 | <i>HAL1</i>       | Cytoplasmic protein involved in halotolerance; decreases intracellular Na <sup>+</sup> (via Ena1p) and increases intracellular K <sup>+</sup> by decreasing efflux; expression repressed by Ssn6p-Tup1p and Sko1p and induced by NaCl, KCl, and sorbitol through Gcn4p                                                                                                                |
| CAGL0K11297g |               | 1,31 | 4,01E-03 | <i>YDR248C</i>    | Putative protein of unknown function; sequence similarity to bacterial and human gluconokinase; green fluorescent protein (GFP)-fusion protein localizes to the cytoplasm; upregulated by deletion of the RNAP-II associated factor, PAF1                                                                                                                                             |
| CAGL0L07744g |               | 1,31 | 7,76E-04 | <i>ADP1</i>       | Putative ATP-dependent permease of the ABC transporter family of proteins                                                                                                                                                                                                                                                                                                             |
| CAGL0A01243g | <i>CgGIT1</i> | 1,30 | 5,87E-03 | -                 | Unknown                                                                                                                                                                                                                                                                                                                                                                               |
| CAGL0I05676g |               | 1,30 | 3,52E-03 | <i>PRP2</i>       | RNA-dependent ATPase in the DEAH-box family, required for activation of the spliceosome before the first transesterification step in RNA splicing; orthologous to human protein DHX16                                                                                                                                                                                                 |
| CAGL0M04675g |               | 1,30 | 6,55E-03 | <i>RDL1</i>       | Protein of unknown function containing a rhodanese-like domain; localized to the mitochondrial outer membrane                                                                                                                                                                                                                                                                         |
| CAGL0J08613g |               | 1,29 | 7,40E-04 | <i>YVC1</i>       | Vacuolar cation channel, mediates release of Ca <sup>2+</sup> from the vacuole in response to hyperosmotic shock                                                                                                                                                                                                                                                                      |
| CAGL0C01771g |               | 1,29 | 3,00E-03 | <i>YBR241C</i>    | Putative transporter, member of the sugar porter family; green fluorescent protein (GFP)-fusion protein localizes to the vacuolar membrane; YBR241C is not an essential gene                                                                                                                                                                                                          |
| CAGL0E01969g |               | 1,29 | 1,65E-03 | <i>SMF1</i>       | Divalent metal ion transporter with a broad specificity for di-valent and tri-valent metals; post-translationally regulated by levels of metal ions; member of the Nramp family of metal transport proteins                                                                                                                                                                           |
| CAGL0L01287g | <i>CgUTR4</i> | 1,29 | 9,04E-04 | <i>UTR4</i>       | Protein with sequence similarity to 2,3-diketio-5-methylthiopentyl-1-phosphate enolase-phosphatases, involved in methionine salvage; found in both the cytoplasm and nucleus                                                                                                                                                                                                          |
| CAGL0L10043g |               | 1,29 | 1,39E-03 | <i>STD1</i>       | Protein involved in control of glucose-regulated gene expression; interacts with kinase Snf1p, glucose sensors Snf3p and Rgt2p, TATA-binding Spt15p; regulator of transcription factor Rgt1p; interactions with Pma1p appear to propagate [GAR <sup>+</sup> ]                                                                                                                         |
| CAGL0H09944g |               | 1,29 | 4,05E-03 | <i>ZTA1</i>       | NADPH-dependent quinone reductase, GFP-tagged protein localizes to the cytoplasm and nucleus; has similarity to E. coli quinone oxidoreductase and to human zeta crystallin                                                                                                                                                                                                           |
| CAGL0G01100g |               | 1,29 | 8,66E-04 | <i>YLR345W</i>    | Similar to 6-phosphofructo-2-kinase/fructose-2,6-bisphosphatase enzymes responsible for the metabolism of fructoso-2,6-bisphosphate; mRNA expression is repressed by the Rfx1p-Tup1p-Ssn6p repressor complex; YLR345W is not an essential gene                                                                                                                                        |
| CAGL0H03135g |               | 1,29 | 7,87E-03 | <i>MF(ALPHA)2</i> | Mating pheromone alpha-factor, made by alpha cells; interacts with mating type a cells to induce cell cycle arrest and other responses leading to mating; also encoded by MF(ALPHA)1, which is more highly expressed than MF(ALPHA)2                                                                                                                                                  |
| CAGL0J11308g |               | 1,28 | 1,82E-03 | <i>NPR1</i>       | Protein kinase that stabilizes several plasma membrane amino acid transporters by antagonizing their ubiquitin-mediated degradation; phosphorylates Aly2p; negatively regulates Ldb19p-mediated endocytosis through phosphorylation of Ldb19p, which prevents its association with the plasma membrane; Npr1p activity is negatively regulated via phosphorylation by the TOR complex |
| CAGL0H07667g |               | 1,28 | 1,84E-03 | <i>PDE1</i>       | Low-affinity cyclic AMP phosphodiesterase, controls glucose and intracellular acidification-induced cAMP signaling, target of the cAMP-protein kinase A (PKA) pathway; glucose induces transcription and inhibits translation                                                                                                                                                         |
| CAGL0I10648g | <i>CgASN2</i> | 1,28 | 1,48E-03 | <i>ASN2</i>       | Asparagine synthetase, isozyme of Asn1p; catalyzes the synthesis of L-asparagine from L-aspartate in the asparagine biosynthetic pathway                                                                                                                                                                                                                                              |
| CAGL0A01045g |               | 1,28 | 2,58E-03 | <i>FUM1</i>       | Fumarase, converts fumaric acid to L-malic acid in the TCA cycle; cytosolic and mitochondrial distribution determined by the N-terminal targeting sequence, protein conformation, and status of glyoxylate shunt; phosphorylated in mitochondria                                                                                                                                      |
| CAGL0H09130g |               | 1,28 | 2,12E-03 | <i>MNN4</i>       | Putative positive regulator of mannosylphosphate transferase (Mnn6p), involved in mannosylphosphorylation of N-linked oligosaccharides; expression increases in late-logarithmic and stationary growth phases                                                                                                                                                                         |
| CAGL0J01699g |               | 1,28 | 3,66E-03 | <i>YPR010C-A</i>  | Putative protein of unknown function; conserved among <i>Saccharomyces sensu stricto</i> species                                                                                                                                                                                                                                                                                      |
| CAGL0K00803g | <i>CgTRX2</i> | 1,28 | 1,96E-03 | <i>TRX1</i>       | Cytoplasmic thioredoxin isoenzyme of the thioredoxin system which protects cells against oxidative and reductive stress, forms LMA1 complex with Pbi2p, acts as a cofactor for Tsa1p, required for ER-Golgi transport and vacuole inheritance                                                                                                                                         |
| CAGL0F04609g |               | 1,27 | 1,41E-03 | <i>EDE1</i>       | Endocytic protein; involved in a network of interactions with other endocytic proteins, binds membranes in a ubiquitin-dependent manner, may also bind ubiquitinated membrane-associated proteins; interacts with Cmk2 and functions upstream of CMK2 in regulating non-apoptotic cell death                                                                                          |
| CAGL0L05654g |               | 1,27 | 3,58E-03 | <i>TRK1</i>       | Component of the Trk1p-Trk2p potassium transport system; 180 kDa high affinity potassium transporter; phosphorylated in vivo and interacts physically with the phosphatase Ppz1p, suggesting Trk1p activity is regulated by phosphorylation                                                                                                                                           |

|              |                |      |          |                  |                                                                                                                                                                                                                                                                                                                     |
|--------------|----------------|------|----------|------------------|---------------------------------------------------------------------------------------------------------------------------------------------------------------------------------------------------------------------------------------------------------------------------------------------------------------------|
| CAGLOC05533g |                | 1,27 | 1,39E-03 | <i>AIM6</i>      | Putative protein of unknown function, required for respiratory growth; YDL237W is not an essential gene                                                                                                                                                                                                             |
| CAGL0M11726g |                | 1,27 | 7,91E-03 | <i>CCW12</i>     | Putative GPI-linked cell wall adhesin-like protein;                                                                                                                                                                                                                                                                 |
| CAGL0M07293g |                | 1,27 | 7,46E-03 | <i>PDR12</i>     | Plasma membrane ATP-binding cassette (ABC) transporter, weak-acid-inducible multidrug transporter required for weak organic acid resistance; induced by sorbate and benzoate and regulated by War1p; mutants exhibit sorbate hypersensitivity                                                                       |
| CAGL0E02321g |                | 1,26 | 7,85E-04 | <i>PLB3</i>      | Phospholipase B (lysophospholipase) involved in phospholipid metabolism; hydrolyzes phosphatidylinositol and phosphatidylserine and displays transacylase activity in vitro                                                                                                                                         |
| CAGL0F05687g |                | 1,26 | 1,89E-03 | <i>YDR186C</i>   | Putative protein of unknown function; may interact with ribosomes, based on co-purification experiments; green fluorescent protein (GFP)-fusion protein localizes to the cytoplasm                                                                                                                                  |
| CAGL0I05082g |                | 1,26 | 1,25E-03 | <i>PIN4</i>      | Protein involved in G2/M phase progression and response to DNA damage, interacts with Rad53p; contains an RNA recognition motif, a nuclear localization signal, and several SQ/TQ cluster domains; hyperphosphorylated in response to DNA damage                                                                    |
| CAGL0I11011g |                | 1,25 | 8,75E-03 | <i>NA</i>        | NA                                                                                                                                                                                                                                                                                                                  |
| CAGL0C04191g |                | 1,25 | 4,46E-03 | <i>UGA2</i>      | Succinate semialdehyde dehydrogenase involved in the utilization of gamma-aminobutyrate (GABA) as a nitrogen source; part of the 4-aminobutyrate and glutamate degradation pathways; localized to the cytoplasm                                                                                                     |
| CAGL0C01397g |                | 1,24 | 2,13E-03 | <i>PFK26</i>     | 6-phosphofructo-2-kinase, inhibited by phosphoenolpyruvate and sn-glycerol 3-phosphate; has negligible fructose-2,6-bisphosphatase activity; transcriptional regulation involves protein kinase A                                                                                                                   |
| CAGL0J00803g |                | 1,24 | 3,20E-03 | <i>MHP1</i>      | Microtubule-associated protein involved in assembly and stabilization of microtubules; overproduction results in cell cycle arrest at G2 phase; similar to Drosophila protein MAP and to mammalian MAP4 proteins                                                                                                    |
| CAGL0L06864g |                | 1,24 | 1,56E-03 | <i>SIP5</i>      | Protein of unknown function; interacts with both the Reg1p/Glc7p phosphatase and the Snf1p kinase                                                                                                                                                                                                                   |
| CAGL0I03872g |                | 1,24 | 1,22E-03 | <i>RGT2</i>      | Plasma membrane high glucose sensor that regulates glucose transport; contains 12 predicted transmembrane segments and a long C-terminal tail required for induction of hexose transporters; highly similar to Snf3p                                                                                                |
| CAGL0L06248g |                | 1,24 | 8,46E-04 | <i>YBR085C-A</i> | Putative protein of unknown function; green fluorescent protein (GFP)-fusion protein localizes to the cytoplasm and to the nucleus                                                                                                                                                                                  |
| CAGL0K10604g |                | 1,24 | 4,48E-03 | <i>CMK1</i>      | Calmodulin-dependent protein kinase; may play a role in stress response, many Ca <sup>++</sup> /calmodulin dependent phosphorylation substrates demonstrated in vitro, amino acid sequence similar to Cmk2p and mammalian Cam Kinase II                                                                             |
| CAGL0J03256g |                | 1,24 | 1,05E-03 | <i>PTP3</i>      | Phosphotyrosine-specific protein phosphatase involved in the inactivation of mitogen-activated protein kinase (MAPK) during osmolarity sensing; dephosphorylates Hog1p MAPK and regulates its localization; localized to the cytoplasm                                                                              |
| CAGL0L09933g |                | 1,23 | 4,45E-03 | <i>CUE5</i>      | Protein containing a CUE domain that binds ubiquitin, which may facilitate intramolecular monoubiquitination; green fluorescent protein (GFP)-fusion protein localizes to the cytoplasm in a punctate pattern                                                                                                       |
| CAGL0C04785g |                | 1,23 | 5,13E-03 | <i>YJR115W</i>   | Putative protein of unknown function                                                                                                                                                                                                                                                                                |
| CAGL0D00990g |                | 1,23 | 9,76E-04 | <i>YDL057W</i>   | Putative protein of unknown function; YDL057W is not an essential gene                                                                                                                                                                                                                                              |
| CAGL0K01133g |                | 1,23 | 2,21E-03 | <i>TWF1</i>      | Twinfilin, highly conserved actin monomer-sequestering protein involved in regulation of the cortical actin cytoskeleton, composed of two cofilin-like regions, localizes actin monomers to sites of rapid filament assembly                                                                                        |
| CAGL0H09614g |                | 1,23 | 5,89E-03 | <i>TIR1</i>      | Cell wall mannoprotein of the Srp1p/Tip1p family of serine-alanine-rich proteins; expression is downregulated at acidic pH and induced by cold shock and anaerobiosis; abundance is increased in cells cultured without shaking                                                                                     |
| CAGL0K04257g |                | 1,23 | 1,01E-03 | <i>RME1</i>      | Zinc finger protein involved in control of meiosis; prevents meiosis by repressing IME1 expression and promotes mitosis by activating CLN2 expression; directly repressed by a1-alpha2 regulator; mediates cell type control of sporulation                                                                         |
| CAGL0L09108g |                | 1,22 | 1,53E-03 | <i>PDH1</i>      | Mitochondrial protein that participates in respiration, induced by diauxic shift; homologous to E. coli PrpD, may take part in the conversion of 2-methylcitrate to 2-methylisocitrate                                                                                                                              |
| CAGL0E06666g | <i>CgEPA2</i>  | 1,22 | 2,14E-03 | -                | Epithelial adhesion protein                                                                                                                                                                                                                                                                                         |
| CAGL0H02695g |                | 1,21 | 1,29E-03 | <i>GLG1</i>      | Self-glucosylating initiator of glycogen synthesis, also glucosylates n-dodecyl-beta-D-maltoside; similar to mammalian glycogenin                                                                                                                                                                                   |
| CAGL0I03476g |                | 1,21 | 8,12E-03 | <i>DHH1</i>      | Cytoplasmic DEXD/H-box helicase, stimulates mRNA decapping; coordinates distinct steps in mRNA function and decay, interacts with both the decapping and deadenylase complexes, may have a role in mRNA export and translation; C-terminus of Dhh1p interacts with Ngr1p and promotes POR1, but not EDC3 mRNA decay |
| CAGL0D01100g |                | 1,21 | 3,25E-03 | <i>PFK26</i>     | 6-phosphofructo-2-kinase, inhibited by phosphoenolpyruvate and sn-glycerol 3-phosphate; has negligible fructose-2,6-bisphosphatase activity; transcriptional regulation involves protein kinase A                                                                                                                   |
| CAGL0I08943g |                | 1,21 | 4,43E-03 | <i>PES4</i>      | Poly(A) binding protein, suppressor of DNA polymerase epsilon mutation, similar to Mip6p                                                                                                                                                                                                                            |
| CAGL0H09592g |                | 1,21 | 3,55E-03 | -                | Putative GPI-linked cell wall protein                                                                                                                                                                                                                                                                               |
| CAGL0B02755g |                | 1,21 | 1,49E-03 | <i>YLR361C-A</i> | Putative protein of unknown function                                                                                                                                                                                                                                                                                |
| CAGL0F01947g | <i>CgIRC15</i> | 1,21 | 2,92E-03 | <i>IRC15</i>     | Microtubule associated protein; regulates microtubule dynamics; required for accurate meiotic chromosome segregation; null mutant displays large budded cells due to delayed mitotic progression, increased levels of spontaneous Rad52 foci                                                                        |
| CAGL0M09108g |                | 1,20 | 4,31E-03 | <i>JSN1</i>      | Member of the Puf family of RNA-binding proteins, interacts with mRNAs encoding membrane-associated proteins; involved in localizing the Arp2/3 complex to mitochondria; overexpression causes increased sensitivity to benomyl                                                                                     |
| CAGL0M05401g |                | 1,20 | 8,32E-03 | <i>YBR201C-A</i> | Putative protein of unknown function                                                                                                                                                                                                                                                                                |
| CAGL0I01980g |                | 1,20 | 1,92E-03 | <i>YSP1</i>      | Mitochondrial protein with a potential role in promoting mitochondrial fragmentation during programmed cell death in response to high levels of alpha-factor mating pheromone or the drug amiodarone                                                                                                                |
| CAGL0L06358g |                | 1,20 | 1,33E-03 | <i>TMS1</i>      | Vacuolar membrane protein of unknown function that is conserved in mammals; predicted to contain eleven transmembrane helices; interacts with Pdr5p, a protein involved in multidrug resistance                                                                                                                     |
| CAGL0K12716g |                | 1,20 | 5,27E-03 | <i>YFLO40W</i>   | Putative transporter, member of the sugar porter family; YFLO40W is not an essential gene                                                                                                                                                                                                                           |
| CAGL0H01177g |                | 1,20 | 2,70E-03 | <i>DPP1</i>      | Diacylglycerol pyrophosphate (DGPP) phosphatase, zinc-regulated vacuolar membrane-associated lipid phosphatase, dephosphorylates DGPP to phosphatidate (PA) and Pi, then PA to diacylglycerol; involved in lipid signaling and cell metabolism                                                                      |
| CAGL0E01859g | <i>CgYPS10</i> | 1,19 | 1,93E-03 | -                | Putative aspartic protease                                                                                                                                                                                                                                                                                          |

|              |               |      |          |                |                                                                                                                                                                                                                                                                                                                                                                                                                              |
|--------------|---------------|------|----------|----------------|------------------------------------------------------------------------------------------------------------------------------------------------------------------------------------------------------------------------------------------------------------------------------------------------------------------------------------------------------------------------------------------------------------------------------|
| CAGL0L12056g | <i>CgBMH1</i> | 1,19 | 1,25E-03 | <i>BMH1</i>    | 14-3-3 protein, major isoform; controls proteome at post-transcriptional level, binds proteins and DNA, involved in regulation of many processes including exocytosis, vesicle transport, Ras/MAPK signaling, and rapamycin-sensitive signaling                                                                                                                                                                              |
| CAGL0K04675g |               | 1,19 | 1,74E-03 | -              | Unknown                                                                                                                                                                                                                                                                                                                                                                                                                      |
| CAGL0E01419g | <i>CgYPS2</i> | 1,18 | 1,81E-03 | <i>MKC7</i>    | GPI-anchored aspartyl protease, member of the yapsin family of proteases involved in cell wall growth and maintenance; shares functions with Yap3p and Kex2p                                                                                                                                                                                                                                                                 |
| CAGL0L10142g | <i>CgRSB1</i> | 1,18 | 2,64E-03 | <i>RSB1</i>    | Suppressor of sphingoid long chain base (LCB) sensitivity of an LCB-lyase mutation; putative integral membrane transporter or flippase that may transport LCBs from the cytoplasmic side toward the extracytoplasmic side of the membrane                                                                                                                                                                                    |
| CAGL0H01287g |               | 1,18 | 2,68E-03 | <i>SSD1</i>    | Translational repressor with a role in polar growth and wall integrity; regulated by Cbk1p phosphorylation to effect bud-specific translational control and localization of specific mRNAs; interacts with TOR pathway components; contains a functional N-terminal nuclear localization sequence and nucleocytoplasmic shuttling appears to be critical to Ssd1p function                                                   |
| CAGL0K04037g | <i>CgFKS2</i> | 1,18 | 6,33E-03 | <i>GSC2</i>    | Catalytic subunit of 1,3-beta-glucan synthase, involved in formation of the inner layer of the spore wall; activity positively regulated by Rho1p and negatively by Smk1p; has similarity to an alternate catalytic subunit, Fks1p (Gsc1p)                                                                                                                                                                                   |
| CAGL0M08800g | <i>CgYAP6</i> | 1,17 | 4,24E-03 | <i>YAP6</i>    | Basic leucine zipper (bZIP) transcription factor; physically interacts with the Tup1-Cyc8 complex and recruits Tup1p to its targets; overexpression increases sodium and lithium tolerance; computational analysis suggests a role in regulation of expression of genes involved in carbohydrate metabolism                                                                                                                  |
| CAGL0M06457g |               | 1,17 | 2,49E-03 | <i>GDT1</i>    | Putative protein of unknown function; expression is reduced in a gcr1 null mutant; GFP-fusion protein localizes to the vacuole; expression pattern and physical interactions suggest a possible role in ribosome biogenesis                                                                                                                                                                                                  |
| CAGL0J01892g | <i>CgPAN1</i> | 1,17 | 3,39E-03 | <i>PAN1</i>    | Part of actin cytoskeleton-regulatory complex Pan1p-Sla1p-End3p, associates with actin patches on the cell cortex; promotes protein-protein interactions essential for endocytosis; binds to and activates the Arp2/3 complex in vitro; previously thought to be a subunit of poly(A) ribonuclease                                                                                                                           |
| CAGL0L06094g | <i>CgSTR3</i> | 1,17 | 6,84E-03 | <i>STR3</i>    | Peroxisomal cystathionine beta-lyase, converts cystathionine into homocysteine; may be redox regulated by Gto1p                                                                                                                                                                                                                                                                                                              |
| CAGL0L09691g |               | 1,17 | 1,59E-03 | <i>PUT3</i>    | Transcriptional activator of proline utilization genes, constitutively binds PUT1 and PUT2 promoter sequences as a dimer and undergoes a conformational change to form the active state; differentially phosphorylated in the presence of different nitrogen sources; has a Zn(2)-Cys(6) binuclear cluster domain                                                                                                            |
| CAGL0E06380g |               | 1,16 | 5,59E-03 | <i>YKL151C</i> | NADHX dehydratase; converts (S)-NADHX to NADH in an ATP-dependent manner; homologous to Carkd in mammals, and the C-terminal domain of YjeF in E.coli; enzyme is widespread in eukaryotes, prokaryotes and archaea; YKL151C promoter contains STREs (stress response elements) and expression is induced by heat shock or methyl methanesulfonate; green fluorescent protein (GFP)-fusion protein localizes to the cytoplasm |
| CAGL0C03850g |               | 1,16 | 4,79E-03 | <i>DOT5</i>    | Nuclear thiol peroxidase which functions as an alkyl-hydroperoxide reductase during post-diauxic growth                                                                                                                                                                                                                                                                                                                      |
| CAGL0E02255g |               | 1,16 | 2,89E-03 | <i>ZEO1</i>    | Peripheral membrane protein of the plasma membrane that interacts with Mid2p; regulates the cell integrity pathway mediated by Pkc1p and Slt2p; the authentic protein is detected in a phosphorylated state in highly purified mitochondria                                                                                                                                                                                  |
| CAGL0K12760g |               | 1,16 | 1,65E-03 | <i>YFL042C</i> | Putative protein of unknown function; YFL042C is not an essential gene                                                                                                                                                                                                                                                                                                                                                       |
| CAGL0C05137g | <i>CgGPD2</i> | 1,15 | 2,09E-03 | <i>GPD2</i>    | NAD-dependent glycerol 3-phosphate dehydrogenase, homolog of Gpd1p, expression is controlled by an oxygen-independent signaling pathway required to regulate metabolism under anoxic conditions; located in cytosol and mitochondria                                                                                                                                                                                         |
| CAGL0L08140g |               | 1,15 | 1,85E-03 | <i>BPH1</i>    | PProtein homologous to human Chediak-Higashi syndrome and murine Beige proteins, which are implicated in disease syndromes due to defective lysosomal trafficking; mutant phenotype and genetic interactions suggest a role in protein sorting                                                                                                                                                                               |
| CAGL0H02497g |               | 1,15 | 2,14E-03 | <i>GFD1</i>    | Coiled-coiled protein of unknown function, identified as a high-copy suppressor of a dbp5 mutation                                                                                                                                                                                                                                                                                                                           |
| CAGL0G05093g |               | 1,15 | 3,81E-03 | <i>YDR061W</i> | Protein with similarity to ATP-binding cassette (ABC) transporter family members; lacks predicted membrane-spanning regions; transcriptionally activated by Yrm1p along with genes involved in multidrug resistance                                                                                                                                                                                                          |
| CAGL0D01474g |               | 1,14 | 1,80E-03 | <i>AIM3</i>    | Protein interacting with Rvs167p; null mutant is viable and displays elevated frequency of mitochondrial genome loss                                                                                                                                                                                                                                                                                                         |
| CAGL0I03168g |               | 1,14 | 3,78E-03 | <i>YELO23C</i> | Putative protein of unknown function; expression is increased greatly during sporulation; YELO23C is not an essential gene                                                                                                                                                                                                                                                                                                   |
| CAGL0J01331g |               | 1,14 | 4,47E-03 | -              | Unknown                                                                                                                                                                                                                                                                                                                                                                                                                      |
| CAGL0L02937g | <i>CgHIS3</i> | 1,14 | 1,41E-03 | <i>HIS3</i>    | Imidazoleglycerol-phosphate dehydratase, catalyzes the sixth step in histidine biosynthesis; mutations cause histidine auxotrophy and sensitivity to Cu, Co, and Ni salts; transcription is regulated by general amino acid control via Gcn4p                                                                                                                                                                                |
| CAGL0C01243g |               | 1,13 | 4,80E-03 | <i>HIS5</i>    | Histidinol-phosphate aminotransferase, catalyzes the seventh step in histidine biosynthesis; responsive to general control of amino acid biosynthesis; mutations cause histidine auxotrophy and sensitivity to Cu, Co, and Ni salts                                                                                                                                                                                          |
| CAGL0I02200g | <i>CgSOL3</i> | 1,13 | 9,52E-03 | <i>SOL3</i>    | 6-phosphogluconolactonase, catalyzes the second step of the pentose phosphate pathway; weak multicopy suppressor of los1-1 mutation; homologous to Sol2p and Sol1p                                                                                                                                                                                                                                                           |
| CAGL0A00539g |               | 1,13 | 1,94E-03 | <i>COG7</i>    | Component of the conserved oligomeric Golgi complex (Cog1p through Cog8p), a cytosolic tethering complex that functions in protein trafficking to mediate fusion of transport vesicles to Golgi compartments                                                                                                                                                                                                                 |
| CAGL0I07887g |               | 1,13 | 1,55E-03 | <i>ATG19</i>   | Receptor protein for the cytoplasm-to-vacuole targeting (Cvt) pathway; delivers cargo proteins aminopeptidase I (Ape1p) and alpha-mannosidase (Ams1p) to the phagophore assembly site for packaging into Cvt vesicles                                                                                                                                                                                                        |
| CAGL0C04939g |               | 1,12 | 6,81E-03 | <i>YJR107W</i> | Putative protein of unknown function; has sequence or structural similarity to lipases                                                                                                                                                                                                                                                                                                                                       |
| CAGL0D00286g | <i>CgBMT1</i> | 1,12 | 1,68E-03 | -              | Beta mannosyltransferase                                                                                                                                                                                                                                                                                                                                                                                                     |
| CAGL0I02046g |               | 1,12 | 2,66E-03 | -              | Unknown                                                                                                                                                                                                                                                                                                                                                                                                                      |
| CAGL0L00803g |               | 1,12 | 4,22E-03 | <i>PIG2</i>    | Putative type-1 protein phosphatase targeting subunit that tethers Glc7p type-1 protein phosphatase to Gsy2p glycogen synthase                                                                                                                                                                                                                                                                                               |
| CAGL0M02629g |               | 1,11 | 5,93E-03 | <i>ISU1</i>    | Conserved protein of the mitochondrial matrix, performs a scaffolding function during assembly of iron-sulfur clusters, interacts physically and functionally with yeast frataxin (Yfh1p); isu1 isu2 double mutant is inviable                                                                                                                                                                                               |
| CAGL0L00957g |               | 1,11 | 3,58E-03 | <i>CAJ1</i>    | Nuclear type II J heat shock protein of the E. coli dnaJ family, contains a leucine zipper-like motif, binds to non-native substrates for presentation to Ssa3p, may function during protein translocation, assembly and disassembly                                                                                                                                                                                         |
| CAGL0H09218g | <i>CgSDT1</i> | 1,11 | 1,64E-03 | <i>SDT1</i>    | Pyrimidine nucleotidase; overexpression suppresses the 6-AU sensitivity of transcription elongation factor S-II, as well as resistance to other pyrimidine derivatives                                                                                                                                                                                                                                                       |
| CAGL0K10736g | <i>CgCYB2</i> | 1,10 | 3,34E-03 | <i>CYB2</i>    | Cytochrome b2 (L-lactate cytochrome-c oxidoreductase), component of the mitochondrial intermembrane space, required for lactate utilization; expression is repressed by glucose and anaerobic conditions                                                                                                                                                                                                                     |
| CAGL0M00550g |               | 1,10 | 2,00E-03 | <i>STR2</i>    | Cystathionine gamma-synthase, converts cysteine into cystathionine                                                                                                                                                                                                                                                                                                                                                           |

|              |               |      |          |                  |                                                                                                                                                                                                                                                                                                                                                                                                                                                                      |
|--------------|---------------|------|----------|------------------|----------------------------------------------------------------------------------------------------------------------------------------------------------------------------------------------------------------------------------------------------------------------------------------------------------------------------------------------------------------------------------------------------------------------------------------------------------------------|
| CAGL0L07810g |               | 1,10 | 4,06E-03 | <i>SAT4</i>      | Ser/Thr protein kinase involved in salt tolerance; functions in regulation of Trk1p-Trk2p potassium transporter; partially redundant with Hal5p; has similarity to Npr1p                                                                                                                                                                                                                                                                                             |
| CAGL0J03916g |               | 1,10 | 2,21E-03 | <i>HES1</i>      | Protein implicated in the regulation of ergosterol biosynthesis; one of a seven member gene family with a common essential function and non-essential unique functions; similar to human oxysterol binding protein (OSBP)                                                                                                                                                                                                                                            |
| CAGL0H03311g |               | 1,10 | 3,78E-03 | <i>YGL081W</i>   | Putative protein of unknown function; non-essential gene; interacts genetically with CH55, a gene involved in chitin biosynthesis                                                                                                                                                                                                                                                                                                                                    |
| CAGL0C02519g |               | 1,10 | 1,83E-03 | <i>MIG3</i>      | Probable transcriptional repressor involved in response to toxic agents such as hydroxyurea that inhibit ribonucleotide reductase; phosphorylation by Snf1p or the Mec1p pathway inactivates Mig3p, allowing induction of damage response genes                                                                                                                                                                                                                      |
| CAGL0G02893g |               | 1,09 | 2,14E-03 | <i>POS5</i>      | Mitochondrial NADH kinase, phosphorylates NADH; also phosphorylates NAD(+) with lower specificity; required for the response to oxidative stress                                                                                                                                                                                                                                                                                                                     |
| CAGL0L02607g |               | 1,09 | 3,40E-03 | <i>YHR202W</i>   | Putative protein of unknown function; green fluorescent protein (GFP)-fusion protein localizes to the vacuole, while HA-tagged protein is found in the soluble fraction, suggesting cytoplasmic localization                                                                                                                                                                                                                                                         |
| CAGL0K09790g |               | 1,09 | 5,71E-03 | <i>SRV2</i>      | CAP (cyclase-associated protein) subunit of adenyl cyclase complex; N-terminus binds adenyl cyclase and facilitates activation by RAS; C-terminus binds ADP-actin monomers, facilitating regulation of actin dynamics and cell morphogenesis                                                                                                                                                                                                                         |
| CAGL0L11440g |               | 1,09 | 3,20E-03 | <i>TCB3</i>      | Lipid-binding ER protein, enriched at ER-plasma membrane contact sites; localized to the bud via specific mRNA transport; non-tagged protein detected in a phosphorylated state in mitochondria; C-termini of Tcb1p, Tcb2p and Tcb3p interact                                                                                                                                                                                                                        |
| CAGL0I01496g |               | 1,09 | 8,26E-03 | <i>SSC1</i>      | Hsp70 family ATPase, constituent of the import motor component of the Translocase of the Inner Mitochondrial membrane (TIM23 complex); involved in protein translocation and folding; subunit of Scl endonuclease                                                                                                                                                                                                                                                    |
| CAGL0E02035g |               | 1,09 | 8,22E-03 | <i>MCH4</i>      | Protein with similarity to mammalian monocarboxylate permeases, which are involved in transport of monocarboxylic acids across the plasma membrane; mutant is not deficient in monocarboxylate transport                                                                                                                                                                                                                                                             |
| CAGL0M08206g |               | 1,09 | 3,64E-03 | <i>YJL171C</i>   | GPI-anchored cell wall protein of unknown function; induced in response to cell wall damaging agents and by mutations in genes involved in cell wall biogenesis; sequence similarity to YBR162C/TOS1, a covalently bound cell wall protein                                                                                                                                                                                                                           |
| CAGL0K05687g |               | 1,08 | 5,93E-03 | -                | Unknown                                                                                                                                                                                                                                                                                                                                                                                                                                                              |
| CAGL0A02299g |               | 1,08 | 5,28E-03 | -                | Unknown                                                                                                                                                                                                                                                                                                                                                                                                                                                              |
| CAGL0M13783g |               | 1,08 | 2,82E-03 | <i>UBP15</i>     | Ubiquitin-specific protease involved in protein deubiquitination; catalytic activity regulated by an N-terminal TRAF-like domain and and C-terminal sequences; physically interacts with anaphase-promoting complex/cyclosome (APC/C) activator, Cdh1p                                                                                                                                                                                                               |
| CAGL0M08552g |               | 1,08 | 2,29E-03 | <i>PMP3</i>      | Small plasma membrane protein related to a family of plant polypeptides that are overexpressed under high salt concentration or low temperature, not essential for viability, deletion causes hyperpolarization of the plasma membrane potential                                                                                                                                                                                                                     |
| CAGL0G08646g |               | 1,08 | 3,18E-03 | <i>POG1</i>      | Nuclear chromatin-associated protein of unknown function; overexpression promotes recovery from pheromone induced arrest and suppresses the stress sensitivity caused by a mutation in the E3 ubiquitin ligase Rsp5p; binds upstream of BAR1 and cell cycle-related genes; potential Cdc28p substrate; SBF regulated                                                                                                                                                 |
| CAGL0G01738g |               | 1,08 | 2,90E-03 | <i>PIL1</i>      | Primary component of eisosomes, which are large immobile cell cortex structures associated with endocytosis; null mutants show activation of Pkc1p/Ypk1p stress resistance pathways; detected in phosphorylated state in mitochondria; member of the BAR domain family                                                                                                                                                                                               |
| CAGL0A00517g |               | 1,08 | 2,58E-03 | <i>PMC1</i>      | Vacuolar Ca <sup>2+</sup> ATPase involved in depleting cytosol of Ca <sup>2+</sup> ions; prevents growth inhibition by activation of calcineurin in the presence of elevated concentrations of calcium; similar to mammalian PMCA1a                                                                                                                                                                                                                                  |
| CAGL0F01419g | <i>CgAUS1</i> | 1,07 | 6,12E-03 | <i>AUS1</i>      | Plasma membrane sterol transporter of the ATP-binding cassette family; required, along with Pdr1p, for uptake of exogenous sterols and their incorporation into the plasma membrane; activity is stimulated by phosphatidylserine; sterol uptake is required for anaerobic growth because sterol biosynthesis requires oxygen                                                                                                                                        |
| CAGL0I10626g |               | 1,07 | 2,77E-03 | <i>YGR125W</i>   | Putative protein of unknown function; deletion mutant has decreased rapamycin resistance but normal wormannin resistance; green fluorescent protein (GFP)-fusion protein localizes to the vacuole                                                                                                                                                                                                                                                                    |
| CAGL0M08602g |               | 1,07 | 6,74E-03 | <i>CCC2</i>      | Cu(+2)-transporting P-type ATPase, required for export of copper from the cytosol into an extracytosolic compartment; has similarity to human proteins involved in Menkes and Wilsons diseases                                                                                                                                                                                                                                                                       |
| CAGL0J09416g |               | 1,07 | 2,21E-03 | <i>SNA4</i>      | Protein of unknown function, localized to the vacuolar outer membrane; predicted to be palmitoylated                                                                                                                                                                                                                                                                                                                                                                 |
| CAGL0M07568g |               | 1,06 | 3,18E-03 | <i>UBC7</i>      | Ubiquitin conjugating enzyme, involved in the ER-associated protein degradation pathway; requires Cue1p for recruitment to the ER membrane; proposed to be involved in chromatin assembly                                                                                                                                                                                                                                                                            |
| CAGL0C03509g |               | 1,06 | 3,78E-03 | <i>FPK1</i>      | Ser/Thr protein kinase that regulates the putative phospholipid translocases Lem3p-Dnf1p/Dnf2p; phosphorylates and inhibits upstream inhibitory kinase, Ypk1p; localizes to the cytoplasm, early endosome/TGN compartments, and plasma membrane                                                                                                                                                                                                                      |
| CAGL0K04367g |               | 1,06 | 2,24E-03 | <i>MUP1</i>      | High affinity methionine permease, integral membrane protein with 13 putative membrane-spanning regions; also involved in cysteine uptake                                                                                                                                                                                                                                                                                                                            |
| CAGL0I02552g | <i>CgSTB5</i> | 1,06 | 4,89E-03 | <i>STB5</i>      | Transcription factor, involved in regulating multidrug resistance and oxidative stress response; forms a heterodimer with Pdr1p; contains a Zn(II)2Cys6 zinc finger domain that interacts with a pleiotropic drug resistance element in vitro                                                                                                                                                                                                                        |
| CAGL0M13365g |               | 1,05 | 3,61E-03 | <i>SSP1</i>      | Protein involved in the control of meiotic nuclear division and coordination of meiosis with spore formation; transcription is induced midway through meiosis                                                                                                                                                                                                                                                                                                        |
| CAGL0L08712g |               | 1,05 | 5,54E-03 | <i>YPL014W</i>   | Putative protein of unknown function; green fluorescent protein (GFP)-fusion protein localizes to the cytoplasm and to the nucleus                                                                                                                                                                                                                                                                                                                                   |
| CAGL0M10549g |               | 1,05 | 5,29E-03 | <i>RCF2</i>      | Cytochrome c oxidase subunit; has a role in assembly of respiratory supercomplexes; similar to Rcf1p, and either Rcf1p or Rcf2p is required for late-stage assembly of the Cox12p and Cox13p subunits and for cytochrome c oxidase activity; associates with the cytochrome c oxidase - cytochrome bc1 supercomplex; null mutant accumulates reactive oxygen species; member of the conserved hypoxia induced gene family; C. elegans homolog is functional in yeast |
| CAGL0F06831g |               | 1,05 | 3,28E-03 | <i>MGA2</i>      | ER membrane protein involved in regulation of OLE1 transcription, acts with homolog Spt23p; inactive ER form dimerizes and one subunit is then activated by ubiquitin/proteasome-dependent processing followed by nuclear targeting                                                                                                                                                                                                                                  |
| CAGL0K12694g | <i>CgACT1</i> | 1,04 | 7,91E-03 | <i>ACT1</i>      | Actin, structural protein involved in cell polarization, endocytosis, and other cytoskeletal functions                                                                                                                                                                                                                                                                                                                                                               |
| CAGL0B00242g |               | 1,04 | 9,46E-03 | <i>HMLALPHA1</i> | Silenced copy of ALPHA1 at HML, encoding a transcriptional coactivator involved in the regulation of mating-type alpha-specific gene expression                                                                                                                                                                                                                                                                                                                      |
| CAGL0A02024g |               | 1,04 | 3,00E-03 | <i>LAG2</i>      | Protein that negatively regulates the SCF E3-ubiquitin ligase by interacting with and preventing neddylation of the cullin subunit, Cdc53p; longevity determinant that is preferentially expressed in young cells; similar to mammalian Cand1                                                                                                                                                                                                                        |
| CAGL0L00649g |               | 1,04 | 2,83E-03 | <i>ACS1</i>      | Acetyl-coA synthetase isoform which, along with Acs2p, is the nuclear source of acetyl-coA for histone acetylation; expressed during growth on nonfermentable carbon sources and under aerobic conditions                                                                                                                                                                                                                                                            |

|              |                |      |          |                |                                                                                                                                                                                                                                                                                                                       |
|--------------|----------------|------|----------|----------------|-----------------------------------------------------------------------------------------------------------------------------------------------------------------------------------------------------------------------------------------------------------------------------------------------------------------------|
| CAGLOF07777g |                | 1,04 | 6,07E-03 | <i>ALD3</i>    | Cytoplasmic aldehyde dehydrogenase, involved in beta-alanine synthesis; uses NAD <sup>+</sup> as the preferred coenzyme; very similar to Ald2p; expression is induced by stress and repressed by glucose                                                                                                              |
| CAGLOF02387g | <i>CgPHO87</i> | 1,04 | 8,27E-03 | <i>PHO90</i>   | Low-affinity phosphate transporter; deletion of <i>pho84</i> , <i>pho87</i> , <i>pho89</i> , <i>pho90</i> , and <i>pho91</i> causes synthetic lethality; transcription independent of Pi and Pho4p activity; overexpression results in vigorous growth                                                                |
| CAGLOI03960g | <i>CgVMA1</i>  | 1,03 | 5,14E-03 | <i>VMA1</i>    | Subunit A of the eight-subunit V1 peripheral membrane domain of the vacuolar H <sup>+</sup> -ATPase; protein precursor undergoes self-catalyzed splicing to yield the extein Tfp1p and the intein Vde (Pi-SceI), which is a site-specific endonuclease                                                                |
| CAGLOD02134g |                | 1,03 | 3,94E-03 | <i>YKL133C</i> | Putative protein of unknown function; has similarity to Mgr3p, but unlike MGR3, is not required for growth of cells lacking the mitochondrial genome (null mutation does not confer a petite-negative phenotype)                                                                                                      |
| CAGLOE00891g |                | 1,03 | 5,63E-03 | <i>STB3</i>    | Ribosomal RNA processing element (RRPE)-binding protein involved in the glucose-induced transition from quiescence to growth; restricted to nucleus in quiescent cells, released into cytoplasm after glucose repletion; binds Sin3p                                                                                  |
| CAGLOK04477g |                | 1,03 | 3,03E-03 | <i>ERG25</i>   | C-4 methyl sterol oxidase, catalyzes the first of three steps required to remove two C-4 methyl groups from an intermediate in ergosterol biosynthesis; mutants accumulate the sterol intermediate 4,4-dimethylzymosterol                                                                                             |
| CAGLOM11484g |                | 1,03 | 5,85E-03 | <i>ARO1</i>    | Pentafunctional arom protein, catalyzes steps 2 through 6 in the biosynthesis of chorismate, which is a precursor to aromatic amino acids                                                                                                                                                                             |
| CAGLOJ01529g |                | 1,02 | 2,93E-03 | <i>RCO1</i>    | Essential subunit of the histone deacetylase Rpd3S complex; interacts with Eaf3p                                                                                                                                                                                                                                      |
| CAGLOL08338g |                | 1,02 | 8,50E-03 | <i>TPM2</i>    | Minor isoform of tropomyosin, binds to and stabilizes actin cables and filaments, which direct polarized cell growth and the distribution of several organelles; appears to have distinct and also overlapping functions with Tpm1p                                                                                   |
| CAGLOI10054g |                | 1,02 | 3,68E-03 | <i>SKN1</i>    | Protein involved in sphingolipid biosynthesis; type II membrane protein with similarity to Kre6p                                                                                                                                                                                                                      |
| CAGLOA03344g |                | 1,02 | 3,47E-03 | <i>ASI3</i>    | Putative integral membrane E3 ubiquitin ligase; acts with Asi1p and Asi2p to ensure the fidelity of SP5-sensor signalling by maintaining the dormant repressed state of gene expression in the absence of inducing signals                                                                                            |
| CAGLOL03982g |                | 1,01 | 7,18E-03 | <i>MLS1</i>    | Malate synthase, enzyme of the glyoxylate cycle, involved in utilization of non-fermentable carbon sources; expression is subject to carbon catabolite repression; localizes in peroxisomes during growth in oleic acid medium                                                                                        |
| CAGLOJ08349g |                | 1,01 | 4,50E-03 | <i>CAF120</i>  | Part of the evolutionarily-conserved CCR4-NOT transcriptional regulatory complex involved in controlling mRNA initiation, elongation, and degradation                                                                                                                                                                 |
| CAGLOE03652g |                | 1,00 | 9,80E-03 | <i>ISA1</i>    | Protein required for maturation of mitochondrial [4Fe-4S] proteins; functions in a complex with Isa2p and possibly Iba57p; isa1 deletion causes loss of mitochondrial DNA and respiratory deficiency; depletion reduces growth on nonfermentable carbon sources; functional ortholog of bacterial A-type ISC proteins |
| CAGLOK04873g |                | 1,00 | 5,05E-03 | <i>YDL233W</i> | Putative protein of unknown function; green fluorescent protein (GFP)-fusion protein localizes to the cytoplasm and nucleus; YDL233W is not an essential gene                                                                                                                                                         |
| CAGLOF01287g | <i>CgGAS5</i>  | 1,00 | 6,74E-03 | <i>GAS5</i>    | 1,3-beta-glucanoyltransferase, has similarity to Gas1p; localizes to the cell wall                                                                                                                                                                                                                                    |
| CAGLOD06512g |                | 1,00 | 5,16E-03 | <i>SDC25</i>   | ANNOTATED BY YGOB - skipping over frameshift in strain S288c                                                                                                                                                                                                                                                          |

#### DOWN-REGULATED GENES

| ORF           | Gene            | log <sub>2</sub> FC (wt AC/wt CTRL) | p_value  | <i>S. cerevisiae</i> orthologue | Function                                                                                                                                                                                                                                                                                |
|---------------|-----------------|-------------------------------------|----------|---------------------------------|-----------------------------------------------------------------------------------------------------------------------------------------------------------------------------------------------------------------------------------------------------------------------------------------|
| CAGLOI01232g  |                 | -1,01                               | 5,26E-03 | <i>ERP5</i>                     | Protein with similarity to Emp24p and Erv25p, member of the p24 family involved in ER to Golgi transport                                                                                                                                                                                |
| CAGLOH05643g  |                 | -1,02                               | 9,58E-03 | <i>RPS6A</i>                    | Protein component of the small (40S) ribosomal subunit; identical to Rps6Bp and has similarity to rat S6 ribosomal protein                                                                                                                                                              |
| CAGLOA00979g  |                 | -1,03                               | 6,06E-03 | <i>RPL38</i>                    | Protein component of the large (60S) ribosomal subunit, has similarity to rat L38 ribosomal protein                                                                                                                                                                                     |
| CAGLOI06985g  |                 | -1,03                               | 5,79E-03 | <i>FRA2</i>                     | Protein involved in negative regulation of transcription of iron regulon; forms an iron independent complex with Fra2p, Grx3p, and Grx4p; null mutant fails to repress iron regulon and is sensitive to nickel                                                                          |
| CAGLOK08954g  |                 | -1,04                               | 3,18E-03 | <i>CDC31</i>                    | Calcium-binding component of the spindle pole body (SPB) half-bridge, required for SPB duplication in mitosis and meiosis II; homolog of mammalian centrin; binds multiubiquitinated proteins and is involved in proteasomal protein degradation                                        |
| CAGLOG00682g  |                 | -1,04                               | 6,90E-03 | <i>ERP1</i>                     | Protein that forms a heterotrimeric complex with Erp2p, Emp24p, and Erv25p; member, along with Emp24p and Erv25p, of the p24 family involved in ER to Golgi transport and localized to COPII-coated vesicles                                                                            |
| CAGLOK07414g  |                 | -1,05                               | 6,43E-03 | -                               | Ortholog(s) have cell surface, cytosolic large ribosomal subunit                                                                                                                                                                                                                        |
| CAGLOJ010164g | <i>CgRPL16A</i> | -1,05                               | 8,64E-03 | <i>RPL16B</i>                   | N-terminally acetylated protein component of the large (60S) ribosomal subunit, binds to 5.8 S rRNA; has similarity to Rpl16Ap, E. coli L13 and rat L13a ribosomal proteins; transcriptionally regulated by Rap1p                                                                       |
| CAGLOL13156g  |                 | -1,05                               | 5,85E-03 | <i>RFU1</i>                     | Protein that inhibits Doa4p deubiquitinating activity; contributes to ubiquitin homeostasis by regulating the conversion of free ubiquitin chains to ubiquitin monomers by Doa4p; GFP-fusion protein localizes to endosomes                                                             |
| CAGLOE06028g  |                 | -1,05                               | 3,79E-03 | <i>ALG5</i>                     | UDP-glucose:dolichyl-phosphate glucosyltransferase, involved in asparagine-linked glycosylation in the endoplasmic reticulum                                                                                                                                                            |
| CAGLOL04840g  |                 | -1,05                               | 9,35E-03 | <i>RPS23A</i>                   | Ribosomal protein 28 (rp28) of the small (40S) ribosomal subunit, required for translational accuracy; nearly identical to Rps23Bp and similar to E. coli S12 and rat S23 ribosomal proteins; deletion of both RPS23A and RPS23B is lethal                                              |
| CAGLOG06490g  |                 | -1,06                               | 3,87E-03 | <i>RPS7B</i>                    | Protein component of the small (40S) ribosomal subunit, nearly identical to Rps7Ap; interacts with Kti11p; deletion causes hypersensitivity to zymocin; has similarity to rat S7 and Xenopus S8 ribosomal proteins                                                                      |
| CAGLOG08734g  |                 | -1,06                               | 5,64E-03 | <i>RPL9B</i>                    | Protein component of the large (60S) ribosomal subunit, nearly identical to Rpl9Ap and has similarity to E. coli L6 and rat L9 ribosomal proteins                                                                                                                                       |
| CAGLOJ06952g  |                 | -1,06                               | 2,95E-03 | <i>IDI1</i>                     | Isopentenyl diphosphate:dimethylallyl diphosphate isomerase (IPP isomerase), catalyzes an essential activation step in the isoprenoid biosynthetic pathway; required for viability                                                                                                      |
| CAGLOL13222g  |                 | -1,06                               | 4,21E-03 | <i>SIC1</i>                     | Cyclin-dependent kinase inhibitor (CKI); inhibitor of Cdc28-Cln kinase complexes that controls G1/S phase transition, preventing premature S phase and ensuring genomic integrity; phosphorylation targets Sic1p for SCF(CDC4)-dependent turnover; functional homolog of mammalian Kip1 |
| CAGLOC02761g  |                 | -1,06                               | 4,14E-03 | <i>ERP2</i>                     | Protein that forms a heterotrimeric complex with Erp1p, Emp24p, and Erv25p; member, along with Emp24p and Erv25p, of the p24 family involved in ER to Golgi transport and localized to COPII-coated vesicles                                                                            |



|              |                |       |          |                  |                                                                                                                                                                                                                                                                           |
|--------------|----------------|-------|----------|------------------|---------------------------------------------------------------------------------------------------------------------------------------------------------------------------------------------------------------------------------------------------------------------------|
| CAGL0K09240g |                | -1,07 | 2,56E-03 | <i>TAH1</i>      | Component of the conserved R2TP complex (Rvb1-Rvb2-Tah1-Pih1); contains a single TPR domain with at least two TPR motifs; R2TP complex interacts with Hsp90 (Hsp82p and Hsc82p) to mediate assembly large protein complexes such as box C/D snoRNPs and RNA polymerase II |
| CAGL0J02354g |                | -1,07 | 6,21E-03 | <i>RPL2B</i>     | Protein component of the large (60S) ribosomal subunit, identical to Rpl2Ap and has similarity to E. coli L2 and rat L8 ribosomal proteins; expression is upregulated at low temperatures                                                                                 |
| CAGL0F02937g |                | -1,07 | 8,07E-03 | <i>RPL12B</i>    | Protein component of the large (60S) ribosomal subunit, nearly identical to Rpl12Ap; rpl12a rpl12b double mutant exhibits slow growth and slow translation; has similarity to E. coli L11 and rat L12 ribosomal proteins                                                  |
| CAGL0L01243g |                | -1,08 | 3,10E-03 | <i>GDA1</i>      | Guanosine diphosphatase located in the Golgi, involved in the transport of GDP-mannose into the Golgi lumen by converting GDP to GMP after mannose is transferred its substrate                                                                                           |
| CAGL0M08118g |                | -1,09 | 3,65E-03 | <i>RPL17A</i>    | Protein component of the large (60S) ribosomal subunit, nearly identical to Rpl17Bp and has similarity to E. coli L22 and rat L17 ribosomal proteins; copurifies with the Dam1 complex (aka DASH complex)                                                                 |
| CAGL0D05742g |                | -1,09 | 3,90E-03 | <i>OST1</i>      | Alpha subunit of the oligosaccharyltransferase complex of the ER lumen, which catalyzes asparagine-linked glycosylation of newly synthesized proteins                                                                                                                     |
| CAGL0E03938g |                | -1,09 | 1,27E-02 | <i>RPL8A</i>     | Ribosomal protein L4 of the large (60S) ribosomal subunit, nearly identical to Rpl8Bp and has similarity to rat L7a ribosomal protein; mutation results in decreased amounts of free 60S subunits                                                                         |
| CAGL0B01203g |                | -1,09 | 9,04E-03 | <i>RPL37A</i>    | Protein component of the large (60S) ribosomal subunit, has similarity to Rpl37Bp and to rat L37 ribosomal protein                                                                                                                                                        |
| CAGL0F01683g |                | -1,10 | 6,55E-03 | <i>RPL22A</i>    | Protein component of the large (60S) ribosomal subunit; exhibits similarity to Rpl22Bp and to rat L22 ribosomal protein; required for the oxidative stress response in yeast                                                                                              |
| CAGL0M07161g | <i>CgEGD2</i>  | -1,10 | 4,85E-03 | <i>EGD2</i>      | Alpha subunit of the heteromeric nascent polypeptide-associated complex (NAC) involved in protein sorting and translocation, associated with cytoplasmic ribosomes                                                                                                        |
| CAGL0L08118g |                | -1,10 | 7,60E-03 | <i>RPS14A</i>    | Ribosomal protein S9 of the small subunit, required for ribosome assembly and 20S pre-rRNA processing; mutations confer cryptopleurine resistance; nearly identical to Rps14Bp and similar to E. coli S11 and rat S14 ribosomal proteins                                  |
| CAGL0L01969g |                | -1,10 | 7,34E-03 | <i>YKLO33W-A</i> | Putative protein of unknown function; similar to uncharacterized proteins from other fungi                                                                                                                                                                                |
| CAGL0K04587g |                | -1,11 | 5,29E-03 | <i>RPS22B</i>    | Protein component of the small (40S) ribosomal subunit; nearly identical to Rps22Ap and has similarity to E. coli S8 and rat S15a ribosomal proteins                                                                                                                      |
| CAGL0L13200g |                | -1,11 | 2,50E-03 | <i>BOS1</i>      | v-SNARE (vesicle specific SNAP receptor), localized to the endoplasmic reticulum membrane and necessary for vesicular transport from the ER to the Golgi                                                                                                                  |
| CAGL0J00737g |                | -1,11 | 7,90E-03 | <i>RPS27B</i>    | Protein component of the small (40S) ribosomal subunit; nearly identical to Rps27Ap and has similarity to rat S27 ribosomal protein                                                                                                                                       |
| CAGL0K02739g |                | -1,13 | 2,25E-03 | <i>LAG1</i>      | Ceramide synthase component, involved in synthesis of ceramide from C26(acyl)-coenzyme A and dihydrospingosine or phytosphingosine, functionally equivalent to Lac1p                                                                                                      |
| CAGL0B03927g |                | -1,13 | 7,16E-03 | <i>TMA22</i>     | Protein of unknown function; associates with ribosomes and has a putative RNA binding domain; interacts with Tma20p; similar to human GRAP and human DRP1, which interacts with human Tma20p homolog MCT-1                                                                |
| CAGL0G01826g |                | -1,14 | 5,20E-03 | <i>RPL11A</i>    | Protein of the large 60S ribosomal subunit, nearly identical to Rpl11Bp but expressed at twice the level; involved in ribosomal assembly; depletion causes degradation of 60S proteins and RNA; similar to E. coli L5 and rat L11                                         |
| CAGL0L12540g |                | -1,14 | 1,69E-03 | <i>EGD1</i>      | Subunit beta1 of the nascent polypeptide-associated complex (NAC) involved in protein targeting, associated with cytoplasmic ribosomes; enhances DNA binding of the Gal4p activator; homolog of human BTF3b                                                               |
| CAGL0E04554g |                | -1,15 | 5,30E-03 | -                | Unknown                                                                                                                                                                                                                                                                   |
| CAGL0K00605g |                | -1,15 | 1,68E-03 | <i>CDC6</i>      | Essential ATP-binding protein required for DNA replication, component of the pre-replicative complex (pre-RC) which requires ORC to associate with chromatin and is in turn required for Mcm2-7p DNA association; homologous to S. pombe Cdc18p                           |
| CAGL0M02365g |                | -1,16 | 5,87E-03 | <i>PPT2</i>      | Phosphopantetheine:protein transferase (PPTase), activates mitochondrial acyl carrier protein (Acp1p) by phosphopantetheinylation                                                                                                                                         |
| CAGL0I00814g |                | -1,16 | 9,89E-03 | <i>RPP1A</i>     | Ribosomal stalk protein P1 alpha, involved in the interaction between translational elongation factors and the ribosome; accumulation of P1 in the cytoplasm is regulated by phosphorylation and interaction with the P2 stalk component                                  |
| CAGL0I07557g |                | -1,17 | 7,28E-03 | <i>RIB3</i>      | 3,4-dihydroxy-2-butanone-4-phosphate synthase (DHBP synthase), required for riboflavin biosynthesis from ribulose-5-phosphate, also has an unrelated function in mitochondrial respiration                                                                                |
| CAGL0E04994g |                | -1,17 | 5,05E-03 | <i>RPL9A</i>     | Protein component of the large (60S) ribosomal subunit, nearly identical to Rpl9Bp and has similarity to E. coli L6 and rat L9 ribosomal proteins                                                                                                                         |
| CAGL0H08976g |                | -1,17 | 5,84E-03 | <i>RPL1B</i>     | N-terminally acetylated protein component of the large (60S) ribosomal subunit, nearly identical to Rpl1Ap and has similarity to E. coli L1 and rat L10a ribosomal proteins; rpl1a rpl1b double null mutation is lethal                                                   |
| CAGL0J07898g |                | -1,17 | 2,75E-03 | <i>GIS2</i>      | Translational activator for mRNAs with internal ribosome entry sites; associates with polysomes and binds to a specific subset of mRNAs; ortholog of human ZNF9/CNBP, a gene involved in myotonic dystrophy type 2                                                        |
| CAGL0L06886g |                | -1,18 | 1,04E-02 | <i>RPL13A</i>    | Protein component of the large (60S) ribosomal subunit, nearly identical to Rpl13Bp; not essential for viability; has similarity to rat L13 ribosomal protein                                                                                                             |
| CAGL0K10906g |                | -1,18 | 4,10E-03 | <i>RPL36A</i>    | N-terminally acetylated protein component of the large (60S) ribosomal subunit, nearly identical to Rpl36Bp and has similarity to rat L36 ribosomal protein; binds to 5.8 S rRNA                                                                                          |
| CAGL0M10241g |                | -1,18 | 4,10E-03 | <i>RPL14A</i>    | N-terminally acetylated protein component of the large (60S) ribosomal subunit, nearly identical to Rpl14Bp and has similarity to rat L14 ribosomal protein; rpl14a csh5 double null mutant exhibits synthetic slow growth                                                |
| CAGL0M06501g |                | -1,19 | 3,80E-03 | <i>RPS9B</i>     | Protein component of the small (40S) ribosomal subunit; nearly identical to Rps9Ap and has similarity to E. coli S4 and rat S9 ribosomal proteins                                                                                                                         |
| CAGL0L10978g |                | -1,19 | 1,84E-03 | <i>CAF20</i>     | Phosphoprotein of the mRNA cap-binding complex involved in translational control, repressor of cap-dependent translation initiation, competes with eIF4G for binding to eIF4E                                                                                             |
| CAGL0K03135g |                | -1,20 | 4,57E-03 | <i>RPS20</i>     | Protein component of the small (40S) ribosomal subunit; overproduction suppresses mutations affecting RNA polymerase III-dependent transcription; has similarity to E. coli S10 and rat S20 ribosomal proteins                                                            |
| CAGL0D00616g |                | -1,20 | 4,54E-03 | <i>RPL31A</i>    | Protein component of the large (60S) ribosomal subunit, nearly identical to Rpl31Bp and has similarity to rat L31 ribosomal protein; associates with the karyopherin Sxm1p; loss of both Rpl31p and Rpl39p confers lethality                                              |
| CAGL0J07238g | <i>CgRPS12</i> | -1,21 | 2,55E-03 | <i>RPS12</i>     | Protein component of the small (40S) ribosomal subunit; has similarity to rat ribosomal protein S12                                                                                                                                                                       |

|              |               |       |          |                |                                                                                                                                                                                                                                                                                          |
|--------------|---------------|-------|----------|----------------|------------------------------------------------------------------------------------------------------------------------------------------------------------------------------------------------------------------------------------------------------------------------------------------|
| CAGLOG09130g |               | -1,23 | 1,68E-03 | <i>RPL7B</i>   | Protein component of the large (60S) ribosomal subunit, nearly identical to Rpl7Ap and has similarity to E. coli L30 and rat L7 ribosomal proteins; contains a conserved C-terminal Nucleic acid Binding Domain (NDB2)                                                                   |
| CAGL0K06149g |               | -1,25 | 2,93E-03 | <i>RPS17B</i>  | Ribosomal protein 51 (rp51) of the small (40S) subunit; nearly identical to Rps17Ap and has similarity to rat S17 ribosomal protein                                                                                                                                                      |
| CAGL0M13563g |               | -1,26 | 5,53E-03 | <i>GOT1</i>    | Homodimeric protein that is packaged into COPII vesicles and cycles between the ER and Golgi; involved in secretory transport but not directly required for aspects of transport assayed in vitro; may influence membrane composition                                                    |
| CAGL0A01562g |               | -1,26 | 8,39E-03 | <i>RPL24A</i>  | Ribosomal protein L30 of the large (60S) ribosomal subunit, nearly identical to Rpl24Bp and has similarity to rat L24 ribosomal protein; not essential for translation but may be required for normal translation rate                                                                   |
| CAGL0K07436g |               | -1,27 | 3,74E-03 | <i>YHM2</i>    | Carrier protein that exports citrate from and imports oxoglutarate into the mitochondrion, causing net export of NADPH reducing equivalents; also associates with mt nucleoids and has a role in replication and segregation of the mt genome                                            |
| CAGL0C04983g | <i>CgADO1</i> | -1,28 | 6,84E-03 | <i>ADO1</i>    | Adenosine kinase, required for the utilization of S-adenosylmethionine (AdoMet); may be involved in recycling adenosine produced through the methyl cycle                                                                                                                                |
| CAGL0H05511g |               | -1,28 | 1,69E-03 | <i>RPS9A</i>   | Protein component of the small (40S) ribosomal subunit; nearly identical to Rps9Bp and has similarity to E. coli S4 and rat S9 ribosomal proteins                                                                                                                                        |
| CAGL0L08114g |               | -1,29 | 1,31E-03 | <i>RPS22A</i>  | Protein component of the small (40S) ribosomal subunit; nearly identical to Rps22Bp and has similarity to E. coli S8 and rat S15a ribosomal proteins                                                                                                                                     |
| CAGL0E02013g |               | -1,30 | 6,37E-03 | <i>RPL18A</i>  | Protein component of the large (60S) ribosomal subunit, identical to Rpl18Bp and has similarity to rat L18 ribosomal protein; intron of RPL18A pre-mRNA forms stem-loop structures that are a target for Rnt1p cleavage leading to degradation                                           |
| CAGL0M02497g |               | -1,31 | 1,97E-03 | <i>RPL33A</i>  | N-terminally acetylated ribosomal protein L37 of the large (60S) ribosomal subunit, nearly identical to Rpl33Bp and has similarity to rat L35a; rpl33a null mutant exhibits slow growth while rpl33a rpl33b double null mutant is inviable                                               |
| CAGL0K06281g |               | -1,32 | 6,33E-04 | <i>GUK1</i>    | Guanylate kinase, converts GMP to GDP; required for growth and mannose outer chain elongation of cell wall N-linked glycoproteins                                                                                                                                                        |
| CAGL0L01551g |               | -1,34 | 2,18E-03 | <i>SUR7</i>    | Plasma membrane protein that localizes to furrow-like invaginations (MCC patches); component of eisosomes; associated with endocytosis, along with Pil1p and Lsp1p; sporulation and plasma membrane sphingolipid content are altered in mutants                                          |
| CAGL0L08184g | <i>CgFEN1</i> | -1,34 | 1,85E-03 | <i>FEN1</i>    | Fatty acid elongase, involved in sphingolipid biosynthesis; acts on fatty acids of up to 24 carbons in length; mutations have regulatory effects on 1,3-beta-glucan synthase, vacuolar ATPase, and the secretory pathway                                                                 |
| CAGL0G07227g |               | -1,34 | 2,48E-03 | <i>RPS18B</i>  | Protein component of the small (40S) ribosomal subunit; nearly identical to Rps18Ap and has similarity to E. coli S13 and rat S18 ribosomal proteins                                                                                                                                     |
| CAGL0L09581g |               | -1,37 | 2,54E-03 | <i>DUT1</i>    | deoxyuridine triphosphate diphosphatase (dUTPase); catalyzes hydrolysis of dUTP to dUMP and PPi, thereby preventing incorporation of uracil into DNA during replication; critical for the maintenance of genetic stability; also has diphosphatase activity on deoxyinosine triphosphate |
| CAGL0G03575g |               | -1,37 | 4,55E-03 | <i>RPL23B</i>  | Protein component of the large (60S) ribosomal subunit, identical to Rpl23Ap and has similarity to E. coli L14 and rat L23 ribosomal proteins                                                                                                                                            |
| CAGL0I04004g |               | -1,37 | 3,13E-03 | <i>YDL183C</i> | Mitochondrial inner-membrane protein thought to be involved in the formation of an active mitochondrial K <sup>+</sup> /H <sup>+</sup> exchanger (KHE) system; non-essential gene                                                                                                        |
| CAGL0J03234g |               | -1,39 | 2,85E-03 | <i>RPS24A</i>  | Protein component of the small (40S) ribosomal subunit; identical to Rps24Bp and has similarity to rat S24 ribosomal protein                                                                                                                                                             |
| CAGL0J06374g |               | -1,43 | 1,67E-03 | <i>RPP1B</i>   | Ribosomal protein P1 beta, component of the ribosomal stalk, which is involved in interaction of translational elongation factors with ribosome; accumulation is regulated by phosphorylation and interaction with the P2 stalk component                                                |
| CAGL0D01606g |               | -1,44 | 2,29E-03 | <i>YMC1</i>    | Mitochondrial protein, putative inner membrane transporter with a role in oleate metabolism and glutamate biosynthesis; member of the mitochondrial carrier (MCF) family; has similarity with Ymc2p                                                                                      |
| CAGL0B02794g |               | -1,45 | 1,21E-03 | <i>ADE13</i>   | Adenylosuccinate lyase, catalyzes two steps in the 'de novo' purine nucleotide biosynthetic pathway; expression is repressed by adenine and activated by Bas1p and Pho2p; mutations in human ortholog ADSL cause adenylosuccinase deficiency                                             |
| CAGL0L12364g |               | -1,47 | 1,68E-03 | <i>ERG10</i>   | Acetyl-CoA C-acetyltransferase (acetoacetyl-CoA thiolase), cytosolic enzyme that transfers an acetyl group from one acetyl-CoA molecule to another, forming acetoacetyl-CoA; involved in the first step in mevalonate biosynthesis                                                       |
| CAGL0K06061g |               | -1,48 | 6,47E-04 | <i>RPS28B</i>  | Protein component of the small (40S) ribosomal subunit; nearly identical to Rps28Ap and has similarity to rat S28 ribosomal protein                                                                                                                                                      |
| CAGL0D01562g | <i>CgFCY1</i> | -1,49 | 1,30E-03 | <i>FCY1</i>    | Cytosine deaminase, zinc metalloenzyme that catalyzes the hydrolytic deamination of cytosine to uracil; of biomedical interest because it also catalyzes the deamination of 5-fluorocytosine (5FC) to form anticancer drug 5-fluorouracil (5FU)                                          |
| CAGL0A00627g |               | -1,53 | 7,63E-04 | <i>ERP6</i>    | Protein with similarity to Emp24p and Erv25p, member of the p24 family involved in ER to Golgi transport; the authentic, non-tagged protein is detected in highly purified mitochondria in high-throughput studies                                                                       |
| CAGL0B01122g | <i>CgSAM1</i> | -1,54 | 1,02E-03 | <i>SAM1</i>    | S-adenosylmethionine synthetase, catalyzes transfer of the adenosyl group of ATP to the sulfur atom of methionine; one of two differentially regulated isozymes (Sam1p and Sam2p)                                                                                                        |
| CAGL0D01716g |               | -1,63 | 1,36E-03 | <i>POL30</i>   | Proliferating cell nuclear antigen (PCNA), functions as the sliding clamp for DNA polymerase delta; may function as a docking site for other proteins required for mitotic and meiotic chromosomal DNA replication and for DNA repair                                                    |
| CAGL0K06259g | <i>CgTSA2</i> | -1,96 | 1,34E-02 | <i>TSA2</i>    | Stress inducible cytoplasmic thioredoxin peroxidase; cooperates with Tsa1p in the removal of reactive oxygen, nitrogen and sulfur species using thioredoxin as hydrogen donor; deletion enhances the mutator phenotype of tsa1 mutants                                                   |
| CAGL0H05137g |               | -2,62 | 4,01E-05 | <i>ALD6</i>    | Cytosolic aldehyde dehydrogenase, activated by Mg <sup>2+</sup> and utilizes NADP <sup>+</sup> as the preferred coenzyme; required for conversion of acetaldehyde to acetate; constitutively expressed; locates to the mitochondrial outer surface upon oxidative stress                 |
