# Supplementary material for: The CgHaa1-Regulon Mediates Response and Tolerance to Acetic Acid Stress in the Human Pathogen Candida glabrata
Source: PubMed Central journal article supplement (PMC5217100; doi:10.1534/g3.116.034660), 2016-11-04
Supplement: 1TableS2.pdf [file 1TableS2.pdf]

**Supplementary Table S2** – List of the genes found to be up- or down- regulated in response to acetic acid (30 mM, at pH 4.0) in *C. glabrata* KUE100\_ΔCgHaa1 cells. Genes whose expression increased or decreased (above a 2-fold threshold level) in acetic acid-challenged cells, in comparison with unstressed cells, were selected and are here listed. Only genes exhibiting similar degree of variance in the three replica samples performed were considered to be differentially expressed in response to acetic acid, as detailed in materials and methods. The biological function indicated is based on the information available at Candida Genome Database.

| UP-REGULATED GENES |                |                                                |          |                                 |                                                                                                                                                                                                                                                                                                                                                           |
|--------------------|----------------|------------------------------------------------|----------|---------------------------------|-----------------------------------------------------------------------------------------------------------------------------------------------------------------------------------------------------------------------------------------------------------------------------------------------------------------------------------------------------------|
| ORF                | Gene name      | log <sub>2</sub> FC (ΔCgHaa1 AC/ ΔCgHaa1 CTRL) | P_value  | <i>S. cerevisiae</i> orthologue | Function                                                                                                                                                                                                                                                                                                                                                  |
| CAGL0M11902g       |                | 4,75                                           | 3,43E-06 | <i>FUN19</i>                    | Non-essential protein of unknown function; expression induced in response to heat stress                                                                                                                                                                                                                                                                  |
| CAGL0J00451g       |                | 4,38                                           | 6,70E-03 | -                               | Putative glyceraldehyde-3-phosphate dehydrogenase                                                                                                                                                                                                                                                                                                         |
| CAGL0M01166g       |                | 4,20                                           | 1,48E-03 | <i>THI4</i>                     | Thiazole synthase, abundant protein involved in the formation of the thiazole moiety of thiamine during thiamine biosynthesis; acts more as a co-substrate rather than an enzyme by providing the sulphur source for thiazole formation; undergoes a single turnover only; required for mitochondrial genome stability in response to DNA damaging agents |
| CAGLE01353g        |                | 4,09                                           | 4,36E-06 | <i>ZRT2</i>                     | Low-affinity zinc transporter of the plasma membrane; transcription is induced under low-zinc conditions by the Zap1p transcription factor                                                                                                                                                                                                                |
| CAGL0G03883g       |                | 4,05                                           | 3,78E-07 | <i>HSP104</i>                   | Disaggregase; Heat shock protein that cooperates with Ydj1p (Hsp40) and Ssa1p (Hsp70) to refold and reactivate previously denatured, aggregated proteins; responsive to stresses including: heat, ethanol, and sodium arsenite; involved in [PSI <sup>+</sup> ] propagation                                                                               |
| CAGL0I10010g       |                | 3,66                                           | 4,76E-03 | <i>BTN2</i>                     | v-SNARE binding protein that facilitates specific protein retrieval from a late endosome to the Golgi; modulates arginine uptake, possible role in mediating pH homeostasis between the vacuole and plasma membrane H(+)-ATPase                                                                                                                           |
| CAGL0B00616g       |                | 3,58                                           | 3,55E-04 | <i>SPS22</i>                    | Protein of unknown function, redundant with Sps2p for the organization of the beta-glucan layer of the spore wall                                                                                                                                                                                                                                         |
| CAGL0M08822g       | <i>CgHSP78</i> | 3,34                                           | 3,89E-05 | <i>HSP78</i>                    | Oligomeric mitochondrial matrix chaperone that cooperates with Ssc1p in mitochondrial thermotolerance after heat shock; able to prevent the aggregation of misfolded proteins as well as resolubilize protein aggregates                                                                                                                                  |
| CAGL0M11660g       |                | 3,06                                           | 5,40E-04 | -                               | Has domain(s) with predicted hydrolase activity                                                                                                                                                                                                                                                                                                           |
| CAGL0K03685g       |                | 3,00                                           | 3,82E-05 | <i>PKR1</i>                     | V-ATPase assembly factor, functions with other V-ATPase assembly factors in the ER to efficiently assemble the V-ATPase membrane sector (V0)                                                                                                                                                                                                              |
| CAGL0H08151g       |                | 2,99                                           | 2,20E-05 | -                               | Unknown                                                                                                                                                                                                                                                                                                                                                   |
| CAGL0H08173g       |                | 2,94                                           | 6,67E-05 | -                               | Unknown                                                                                                                                                                                                                                                                                                                                                   |
| CAGLE00803g        |                | 2,88                                           | 1,12E-04 | <i>HSP42</i>                    | Small heat shock protein (sHSP) with chaperone activity; forms barrel-shaped oligomers that suppress unfolded protein aggregation; involved in cytoskeleton reorganization after heat shock                                                                                                                                                               |
| CAGL0H00704g       |                | 2,86                                           | 2,73E-04 | <i>ICY2</i>                     | Protein of unknown function; mobilized into polysomes upon a shift from a fermentable to nonfermentable carbon source; potential Cdc28p substrate                                                                                                                                                                                                         |
| CAGL0D01276g       |                | 2,77                                           | 7,29E-03 | <i>OPY2</i>                     | Integral membrane protein that functions in the signaling branch of the high-osmolarity glycerol (HOG) pathway; interacts with Ste50p; overproduction blocks cell cycle arrest in the presence of mating pheromone                                                                                                                                        |
| CAGL0H04279g       | <i>MT-IIIB</i> | 2,73                                           | 8,15E-06 | -                               | Copper-binding metallothionein                                                                                                                                                                                                                                                                                                                            |
| CAGL0H08844g       |                | 2,71                                           | 1,30E-05 | <i>DDR48</i>                    | DNA damage-responsive protein, expression is increased in response to heat-shock stress or treatments that produce DNA lesions; contains multiple repeats of the amino acid sequence NNNDYGS                                                                                                                                                              |
| CAGL0K12254g       |                | 2,71                                           | 1,10E-04 | <i>VID24</i>                    | Peripheral membrane protein located at Vid (vacuole import and degradation) vesicles; regulates fructose-1,6-bisphosphatase (FBPase) targeting to the vacuole; promotes proteasome-dependent catabolite degradation of FBPase                                                                                                                             |
| CAGL0J04202g       | <i>CgHSP12</i> | 2,70                                           | 1,65E-03 | <i>HSP12</i>                    | Plasma membrane protein involved in maintaining membrane organization in stress conditions; induced by heat shock, oxidative stress, osmotic stress, stationary phase, glucose depletion, oleate and alcohol; regulated by HOG and Ras-Pka pathways                                                                                                       |
| CAGL0G08624g       | <i>CgQDR2</i>  | 2,69                                           | 1,08E-05 | <i>QDR1</i>                     | Multidrug transporter of the major facilitator superfamily, required for resistance to quinidine, ketoconazole, fluconazole, and barban                                                                                                                                                                                                                   |
| CAGLE06358g        | <i>CgGPM1</i>  | 2,58                                           | 3,23E-06 | <i>GPM1</i>                     | Tetrameric phosphoglycerate mutase, mediates the conversion of 3-phosphoglycerate to 2-phosphoglycerate during glycolysis and the reverse reaction during gluconeogenesis                                                                                                                                                                                 |
| CAGL0H03707g       |                | 2,57                                           | 5,12E-05 | <i>SIS1</i>                     | Type II HSP40 co-chaperone that interacts with the HSP70 protein Ssa1p; not functionally redundant with Ydj1p due to substrate specificity; shares similarity with bacterial DnaJ proteins                                                                                                                                                                |
| CAGL0K08338g       |                | 2,55                                           | 3,42E-05 | -                               | Unknown                                                                                                                                                                                                                                                                                                                                                   |
| CAGL0F08261g       |                | 2,55                                           | 9,61E-04 | <i>ENO1</i>                     | Enolase I, a phosphopyruvate hydratase that catalyzes the conversion of 2-phosphoglycerate to phosphoenolpyruvate during glycolysis and the reverse reaction during gluconeogenesis; expression is repressed in response to glucose                                                                                                                       |
| CAGL0I01595g       | <i>CgGLM6</i>  | 2,55                                           | 9,50E-05 | <i>YPR015C</i>                  | Putative protein of unknown function; overexpression causes a cell cycle delay or arrest                                                                                                                                                                                                                                                                  |
| CAGL0K10164g       |                | 2,54                                           | 1,24E-05 | <i>SED1</i>                     | Major stress-induced structural GPI-cell wall glycoprotein in stationary-phase cells, associates with translating ribosomes, possible role in mitochondrial genome maintenance; ORF contains two distinct variable minisatellites                                                                                                                         |
| CAGL0M12320g       |                | 2,53                                           | 2,66E-04 | <i>FLC2</i>                     | Putative FAD transporter; required for uptake of FAD into endoplasmic reticulum; involved in cell wall maintenance                                                                                                                                                                                                                                        |
| CAGL0I07568g       |                | 2,50                                           | 5,11E-02 | <i>LAP3</i>                     | Cysteine aminopeptidase with homocysteine-thiolactonase activity; protects cells against homocysteine toxicity; has bleomycin hydrolase activity in vitro; transcription is regulated by galactose via Gal4p; orthologous to human BLMH                                                                                                                   |
| CAGL0L06446g       |                | 2,48                                           | 2,30E-04 | <i>YDR132C</i>                  | Putative protein of unknown function                                                                                                                                                                                                                                                                                                                      |
| CAGL0M07920g       | <i>CgPDC</i>   | 2,46                                           | 1,99E-05 | <i>PDC1</i>                     | Major of three pyruvate decarboxylase isozymes, key enzyme in alcoholic fermentation, decarboxylates pyruvate to acetaldehyde; subject to glucose-, ethanol-, and autoregulation; involved in amino acid catabolism                                                                                                                                       |
| CAGL0D04752g       |                | 2,46                                           | 4,55E-05 | <i>YPR127W</i>                  | Protein of unknown function, differentially expressed during alcoholic fermentation; expression activated by transcription factor YRM1/YOR172W; green fluorescent protein (GFP)-fusion protein localizes to both the cytoplasm and the nucleus                                                                                                            |
| CAGL0G09383g       | <i>CgTDH3</i>  | 2,42                                           | 5,67E-05 | <i>TDH3</i>                     | Glyceraldehyde-3-phosphate dehydrogenase, isozyme 3, involved in glycolysis and gluconeogenesis; tetramer that catalyzes the reaction of glyceraldehyde-3-phosphate to 1,3 bis-phosphoglycerate; detected in the cytoplasm and cell wall                                                                                                                  |
| CAGL0D01270g       |                | 2,41                                           | 1,93E-05 | -                               | Unknown                                                                                                                                                                                                                                                                                                                                                   |
| CAGL0I05874g       |                | 2,39                                           | 1,89E-05 | -                               | Haloacid dehalogenase-like hydrolase                                                                                                                                                                                                                                                                                                                      |

|              |          |      |          |           |                                                                                                                                                                                                                                                                                                                                                                                                                                                                         |
|--------------|----------|------|----------|-----------|-------------------------------------------------------------------------------------------------------------------------------------------------------------------------------------------------------------------------------------------------------------------------------------------------------------------------------------------------------------------------------------------------------------------------------------------------------------------------|
| CAGLOF06413g |          | 2,39 | 4,66E-02 | FET3      | Ferro-O2-oxidoreductase required for high-affinity iron uptake and involved in mediating resistance to copper ion toxicity, belongs to class of integral membrane multicopper oxidases                                                                                                                                                                                                                                                                                  |
| CAGLOM12430g | CgRHRZ   | 2,37 | 7,17E-04 | RHRZ      | Constitutively expressed isoform of DL-glycerol-3-phosphatase; involved in glycerol biosynthesis, induced in response to both anaerobic and, along with the Hor2p/Gpp2p isoform, osmotic stress                                                                                                                                                                                                                                                                         |
| CAGLOC02321g | CgPHM8   | 2,36 | 2,21E-04 | PHM8      | Lysophosphatidic acid (LPA) phosphatase involved in LPA hydrolysis in response to phosphate starvation; phosphatase activity is soluble and Mg <sup>2+</sup> dependent; expression is induced by low phosphate levels and by inactivation of Pho85p                                                                                                                                                                                                                     |
| CAGLOK11858g |          | 2,34 | 3,17E-05 | PST2      | Protein with similarity to members of a family of flavodoxin-like proteins; induced by oxidative stress in a Yap1p dependent manner; the authentic, non-tagged protein is detected in highly purified mitochondria in high-throughput studies                                                                                                                                                                                                                           |
| CAGLOL07222g | CgPGK1   | 2,34 | 6,39E-06 | PGK1      | 3-phosphoglycerate kinase, catalyzes transfer of high-energy phosphoryl groups from the acyl phosphate of 1,3-bisphosphoglycerate to ADP to produce ATP; key enzyme in glycolysis and gluconeogenesis                                                                                                                                                                                                                                                                   |
| CAGLOE04312g |          | 2,28 | 3,53E-03 | STP2      | Transcription factor, activated by proteolytic processing in response to signals from the SPS sensor system for external amino acids; activates transcription of amino acid permease genes                                                                                                                                                                                                                                                                              |
| CAGLOK09702g |          | 2,27 | 3,05E-03 | YNL134C   | Putative protein of unknown function with similarity to dehydrogenases from other model organisms; green fluorescent protein (GFP)-fusion protein localizes to both the cytoplasm and nucleus and is induced by the DNA-damaging agent MMS                                                                                                                                                                                                                              |
| CAGLOL07480g |          | 2,24 | 9,75E-05 | NRG2      | Transcriptional repressor that mediates glucose repression and negatively regulates filamentous growth; has similarity to Nrg1p                                                                                                                                                                                                                                                                                                                                         |
| CAGLO10494g  |          | 2,21 | 4,24E-05 | APT2      | Apparent pseudogene, not transcribed or translated under normal conditions; encodes a protein with similarity to adenine phosphoribosyltransferase, but artificially expressed protein exhibits no enzymatic activity                                                                                                                                                                                                                                                   |
| CAGLOA02046g |          | 2,20 | 2,00E-02 | ROD1      | Membrane protein that binds the ubiquitin ligase Rsp5p via its 2 PY motifs; overexpression confers resistance to the GST substrate o-dinitrobenzene,zinc, and calcium; proposed to regulate the endocytosis of plasma membrane proteins                                                                                                                                                                                                                                 |
| CAGLOE01881g | CgYPS11  | 2,19 | 6,06E-04 | -         | Putative aspartic protease                                                                                                                                                                                                                                                                                                                                                                                                                                              |
| CAGLOK10868g | CgCTA1   | 2,18 | 7,92E-04 | CTA1      | Catalase A, breaks down hydrogen peroxide in the peroxisomal matrix formed by acyl-CoA oxidase (Pox1p) during fatty acid beta-oxidation                                                                                                                                                                                                                                                                                                                                 |
| CAGLOB03069g | CgTAL1   | 2,17 | 8,48E-05 | TAL1      | Transaldolase, enzyme in the non-oxidative pentose phosphate pathway; converts sedoheptulose 7-phosphate and glyceraldehyde 3-phosphate to erythrose 4-phosphate and fructose 6-phosphate                                                                                                                                                                                                                                                                               |
| CAGLOE01793g | CgYPS6   | 2,14 | 1,30E-04 | -         | Putative aspartic protease                                                                                                                                                                                                                                                                                                                                                                                                                                              |
| CAGLOI02486g | CgENO1   | 2,14 | 1,44E-05 | ENO2      | Enolase II, a phosphopyruvate hydratase that catalyzes the conversion of 2-phosphoglycerate to phosphoenolpyruvate during glycolysis and the reverse reaction during gluconeogenesis; expression is induced in response to glucose                                                                                                                                                                                                                                      |
| CAGLOD05082g |          | 2,12 | 1,05E-04 | UBI4      | Ubiquitin, becomes conjugated to proteins, marking them for selective degradation via the ubiquitin-26S proteasome system; essential for the cellular stress response; encoded as a polyubiquitin precursor comprised of 5 head-to-tail repeats                                                                                                                                                                                                                         |
| CAGLOE01837g | CgYPS9   | 2,12 | 3,49E-05 | -         | Putative aspartic protease                                                                                                                                                                                                                                                                                                                                                                                                                                              |
| CAGLOG03289g | CgSSA3   | 2,09 | 4,69E-03 | SSA4      | Heat shock protein that is highly induced upon stress; plays a role in SRP-dependent cotranslational protein-membrane targeting and translocation; member of the HSP70 family; cytoplasmic protein that concentrates in nuclei upon starvation                                                                                                                                                                                                                          |
| CAGLOM04191g | CgYPS1   | 2,07 | 1,50E-04 | YPS1      | Aspartic protease, member of the yapsin family of proteases involved in cell wall growth and maintenance; attached to the plasma membrane via a glycosylphosphatidylinositol (GPI) anchor                                                                                                                                                                                                                                                                               |
| CAGLOC00275g | CgHSP31  | 2,05 | 7,64E-02 | HSP31     | Putative cysteine protease                                                                                                                                                                                                                                                                                                                                                                                                                                              |
| CAGLOI09724g |          | 2,05 | 9,94E-05 | -         | Has domain(s) with predicted role in transmembrane transport                                                                                                                                                                                                                                                                                                                                                                                                            |
| CAGLOK05813g |          | 2,04 | 4,86E-03 | GRX2      | Cytoplasmic glutaredoxin, thioltransferase, glutathione-dependent disulfide oxidoreductase involved in maintaining redox state of target proteins, also exhibits glutathione peroxidase activity, expression induced in response to stress                                                                                                                                                                                                                              |
| CAGLOI00418g |          | 2,00 | 6,28E-03 | OLE1      | Delta(9) fatty acid desaturase, required for monounsaturated fatty acid synthesis and for normal distribution of mitochondria                                                                                                                                                                                                                                                                                                                                           |
| CAGLOK03663g |          | 1,99 | 1,07E-04 | YMR122W-A | Protein of unknown function; green fluorescent protein (GFP)-fusion protein localizes to the cytoplasm and endoplasmic reticulum                                                                                                                                                                                                                                                                                                                                        |
| CAGLOK03707g |          | 1,98 | 8,31E-04 | YMR124W   | Protein of unknown function; GFP-fusion protein localizes to the cell periphery, cytoplasm, bud, and bud neck; interacts with Crm1p in two-hybrid assay; YMR124W is not an essential gene; predicted to have a role in organelle organization                                                                                                                                                                                                                           |
| CAGLOB00990g | CgHBN1   | 1,98 | 1,27E-04 | FRM2      | Type II nitroreductase, using NADH as reductant; mutants are defective in fatty acid mediated repression of genes involved in fatty acid biosynthesis indicative of a role in lipid signaling; involved in the oxidative stress response; transcription induction by cadmium and selenite indicates a possible role in the metal stress response; expression induced in cells treated with the mycotoxin patulin                                                        |
| CAGLOG08866g |          | 1,96 | 2,22E-03 | FKH1      | Forkhead family transcription factor with a minor role in the expression of G2/M phase genes; negatively regulates transcriptional elongation; positive role in chromatin silencing at HML and HMR; regulates donor preference during switching                                                                                                                                                                                                                         |
| CAGLOI05934g |          | 1,95 | 1,27E-02 | YIL144W   | Cytoplasmic hydrophilin essential in desiccation-rehydration process; expression induced by osmotic stress, starvation and during stationary phase; GFP-fusion protein is induced by the DNA-damaging agent MMS                                                                                                                                                                                                                                                         |
| CAGLOH02101g |          | 1,95 | 7,68E-02 | RTC3      | Protein of unknown function involved in RNA metabolism; has structural similarity to SBDS, the human protein mutated in Shwachman-Diamond Syndrome (the yeast SBDS ortholog = SDO1); null mutation suppresses cdc13-1 temperature sensitivity                                                                                                                                                                                                                           |
| CAGLOF08371g | CgTNA1   | 1,94 | 3,18E-05 | TNA1      | High affinity nicotinic acid plasma membrane permease, responsible for uptake of low levels of nicotinic acid; expression of the gene increases in the absence of extracellular nicotinic acid or para-aminobenzoate (PABA)                                                                                                                                                                                                                                             |
| CAGLOH02563g |          | 1,93 | 9,08E-04 | HOR7      | Protein of unknown function; overexpression suppresses Ca <sup>2+</sup> sensitivity of mutants lacking inositol phosphoricceramide mannosyltransferases Csg1p and Csh1p; transcription is induced under hyperosmotic stress and repressed by alpha factor                                                                                                                                                                                                               |
| CAGLOE06424g |          | 1,90 | 2,67E-03 | MCR1      | Mitochondrial NADH-cytochrome b5 reductase, involved in ergosterol biosynthesis                                                                                                                                                                                                                                                                                                                                                                                         |
| CAGLOL10362g |          | 1,90 | 1,14E-04 | YOR062C   | Protein of unknown function; similar to YKR075Cp and Reg1p; expression regulated by glucose and Rgt1p; GFP-fusion protein is induced in response to the DNA-damaging agent MMS                                                                                                                                                                                                                                                                                          |
| CAGLOG01540g | CgNCE103 | 1,89 | 1,72E-03 | NCE103    | Carbonic anhydrase; metalloenzyme that catalyzes CO <sub>2</sub> hydration to bicarbonate, which is an important metabolic substrate, and protons; not expressed under conditions of high CO <sub>2</sub> , such as inside a growing colony, but transcription is induced in response to low CO <sub>2</sub> levels, such as on the colony surface in ambient air; poorly transcribed under aerobic conditions and at an undetectable level under anaerobic conditions; |
| CAGLOG04763g |          | 1,89 | 7,03E-03 | RG52      | Negative regulator of glucose-induced cAMP signaling; directly activates the GTPase activity of the heterotrimeric G protein alpha subunit Gpa2p                                                                                                                                                                                                                                                                                                                        |
| CAGLOD06402g | CgMET15  | 1,89 | 1,70E-04 | MET17     | Methionine and cysteine synthase (O-acetyl homoserine-O-acetyl serine sulphydrylase), required for sulfur amino acid synthesis                                                                                                                                                                                                                                                                                                                                          |
| CAGLOF01111g |          | 1,88 | 3,69E-03 | OPI10     | Protein with a possible role in phospholipid biosynthesis, based on inositol-excreting phenotype of the null mutant and its suppression by exogenous choline                                                                                                                                                                                                                                                                                                            |
| CAGLOH02959g | CgTOS8   | 1,88 | 4,26E-04 | TOS8      | Homeodomain-containing protein and putative transcription factor found associated with chromatin; target of SBF transcription factor; induced during meiosis and under cell-damaging conditions; similar to Cup9p transcription factor                                                                                                                                                                                                                                  |
| CAGLOI01122g | CgGRE3   | 1,86 | 8,57E-05 | GRE3      | Aldehyde reductase involved in methylglyoxal, d-xylose, arabinose, and galactose metabolism; stress induced (osmotic, ionic, oxidative, heat shock, starvation and heavy metals); regulated by the HOG pathway                                                                                                                                                                                                                                                          |
| CAGLO11242g  |          | 1,85 | 3,82E-03 | RHO5      | Non-essential small GTPase of the Rho/Rac subfamily of Ras-like proteins, likely involved in protein kinase C (Pkc1p)-dependent signal transduction pathway that controls cell integrity                                                                                                                                                                                                                                                                                |
| CAGLOG03795g | CgSSA1   | 1,84 | 6,21E-04 | SSA2      | ATP binding protein involved in protein folding and vacuolar import of proteins; member of heat shock protein 70 (HSP70) family; associated with the chaperonin-containing T-complex; present in the cytoplasm, vacuolar membrane and cell wall; 98% identical with Ssa1p, but subtle differences between the two proteins provide functional specificity with respect to propagation of yeast [URE3] prions and vacuolar-mediated                                      |

|              |                 |      |          |                |                                                                                                                                                                                                                                                                                                                                                                                                      |
|--------------|-----------------|------|----------|----------------|------------------------------------------------------------------------------------------------------------------------------------------------------------------------------------------------------------------------------------------------------------------------------------------------------------------------------------------------------------------------------------------------------|
| CAGLOH08327g | <i>CgTPI1</i>   | 1,84 | 4,80E-05 | <i>TPI1</i>    | Triose phosphate isomerase, abundant glycolytic enzyme; mRNA half-life is regulated by iron availability; transcription is controlled by activators Reb1p, Gcr1p, and Rap1p through binding sites in the 5' non-coding region; inhibition of Tpi1p activity by PEP (phosphoenolpyruvate) stimulates redox metabolism in respiring cells; E104D mutation in human TPI causes a rare autosomal disease |
| CAGLOF04631g |                 | 1,84 | 2,30E-04 | <i>MOH1</i>    | Protein of unknown function, has homology to kinase Snf7p; not required for growth on nonfermentable carbon sources; essential for survival in stationary phase                                                                                                                                                                                                                                      |
| CAGLOM02167g |                 | 1,83 | 5,99E-03 | <i>PRM4</i>    | Pheromone-regulated protein proposed to be involved in mating; predicted to have 1 transmembrane segment; transcriptionally regulated by Ste12p during mating and by Cat8p during the diauxic shift                                                                                                                                                                                                  |
| CAGLOH03971g |                 | 1,82 | 1,13E-03 | <i>YCP4</i>    | Protein of unknown function, has sequence and structural similarity to flavodoxins; predicted to be palmitoylated; the authentic, non-tagged protein is detected in highly purified mitochondria in high-throughput studies                                                                                                                                                                          |
| CAGLOK00803g | <i>CgTRX2</i>   | 1,82 | 2,75E-04 | <i>TRX1</i>    | Cytoplasmic thioredoxin isoenzyme of the thioredoxin system which protects cells against oxidative and reductive stress, forms LMA1 complex with Pbi2p, acts as a cofactor for Tsa1p, required for ER-Golgi transport and vacuole inheritance                                                                                                                                                        |
| CAGLOG07271g |                 | 1,80 | 7,45E-04 | <i>TSA1</i>    | Thioredoxin peroxidase, acts as both a ribosome-associated and free cytoplasmic antioxidant; self-associates to form a high-molecular weight chaperone complex under oxidative stress; deletion results in mutator phenotype                                                                                                                                                                         |
| CAGLOK04169g |                 | 1,80 | 9,45E-03 | <i>KSS1</i>    | Mitogen-activated protein kinase (MAPK) involved in signal transduction pathways that control filamentous growth and pheromone response; the KSS1 gene is nonfunctional in S288C strains and functional in W303 strains                                                                                                                                                                              |
| CAGLO803619g |                 | 1,80 | 6,01E-03 | <i>PRB1</i>    | Vacuolar proteinase B (yscB), a serine protease of the subtilisin family; involved in protein degradation in the vacuole and required for full protein degradation during sporulation; activity inhibited by Pbi2p                                                                                                                                                                                   |
| CAGLOF07579g | <i>CgCWP1_2</i> | 1,80 | 7,84E-05 | <i>CWP1</i>    | Cell wall mannoprotein that localizes specifically to birth scars of daughter cells, linked to a beta-1,3- and beta-1,6-glucan heteropolymer through a phosphodiester bond; required for propionic acid resistance                                                                                                                                                                                   |
| CAGLOM13343g | <i>CgGND1</i>   | 1,79 | 1,04E-03 | <i>GND1</i>    | 6-phosphogluconate dehydrogenase (decarboxylating), catalyzes an NADPH regenerating reaction in the pentose phosphate pathway; required for growth on D-glucono-delta-lactone and adaptation to oxidative stress                                                                                                                                                                                     |
| CAGLOF07601g | <i>CgCWP1_1</i> | 1,78 | 1,64E-04 | <i>CWP2</i>    | Covalently linked cell wall mannoprotein, major constituent of the cell wall; plays a role in stabilizing the cell wall; involved in low pH resistance; precursor is GPI-anchored                                                                                                                                                                                                                    |
| CAGLO05390g  |                 | 1,78 | 1,32E-03 | <i>SKS1</i>    | Putative serine/threonine protein kinase; involved in the adaptation to low concentrations of glucose independent of the SNF3 regulated pathway                                                                                                                                                                                                                                                      |
| CAGLOG09449g | <i>CgCRH1</i>   | 1,77 | 4,72E-05 | <i>CRH1</i>    | Chitin transglycosylase that functions in the transfer of chitin to beta(1-6) and beta(1-3) glucans in the cell wall; similar and functionally redundant to Utr2; localizes to sites of polarized growth; expression induced by cell wall stress                                                                                                                                                     |
| CAGLOM07315g |                 | 1,77 | 1,45E-02 | <i>SUR1</i>    | Probable catalytic subunit of a mannosylinositol phosphoryceramide (MIPC) synthase, forms a complex with probable regulatory subunit Csg2p; function in sphingolipid biosynthesis is overlapping with that of Csh1p                                                                                                                                                                                  |
| CAGLOI06182g | <i>CgPIR2</i>   | 1,76 | 7,80E-05 | <i>HSP150</i>  | O-mannosylated heat shock protein that is secreted and covalently attached to the cell wall via beta-1,3-glucan and disulfide bridges; required for cell wall stability; induced by heat shock, oxidative stress, and nitrogen limitation                                                                                                                                                            |
| CAGLO803685g |                 | 1,75 | 2,64E-03 | <i>YCP4</i>    | Protein of unknown function, has sequence and structural similarity to flavodoxins; predicted to be palmitoylated; the authentic, non-tagged protein is detected in highly purified mitochondria in high-throughput studies                                                                                                                                                                          |
| CAGLOM12034g | <i>CgPYK1</i>   | 1,75 | 1,68E-04 | <i>CDC19</i>   | Pyruvate kinase, functions as a homotetramer in glycolysis to convert phosphoenolpyruvate to pyruvate, the input for aerobic (TCA cycle) or anaerobic (glucose fermentation) respiration                                                                                                                                                                                                             |
| CAGLOL09383g |                 | 1,75 | 3,89E-04 | <i>SUT2</i>    | Putative transcription factor; multicopy suppressor of mutations that cause low activity of the cAMP/protein kinase A pathway; highly similar to Sut1p                                                                                                                                                                                                                                               |
| CAGLOE05654g |                 | 1,74 | 3,96E-03 | <i>PGC1</i>    | Phosphatidyl Glycerol phospholipase C; regulates the phosphatidylglycerol (PG) content via a phospholipase C-type degradation mechanism; contains glycerophosphodiester phosphodiesterase motifs                                                                                                                                                                                                     |
| CAGLOI10846g |                 | 1,74 | 3,43E-05 | <i>PCL5</i>    | Cyclin, interacts with and phosphorylated by Pho85p cyclin-dependent kinase (Cdk), induced by Gcn4p at level of transcription, specifically required for Gcn4p degradation, may be sensor of cellular protein biosynthetic capacity                                                                                                                                                                  |
| CAGLOI01100g | <i>CgGCY1</i>   | 1,74 | 2,85E-03 | <i>GCY1</i>    | Putative NAD(P) <sup>+</sup> coupled glycerol dehydrogenase, proposed to be involved in an alternative pathway for glycerol catabolism; also has mRNA binding activity; member of the aldo-keto reductase (AKR) family                                                                                                                                                                               |
| CAGLOA01221g |                 | 1,74 | 8,26E-05 | -              | Has domain(s) with predicted transporter activity                                                                                                                                                                                                                                                                                                                                                    |
| CAGLOM13189g | <i>CgMSN4</i>   | 1,71 | 6,54E-04 | <i>MSN4</i>    | Transcriptional activator related to Msn2p; activated in stress conditions, which results in translocation from the cytoplasm to the nucleus; binds DNA at stress response elements of responsive genes, inducing gene expression                                                                                                                                                                    |
| CAGLOF08745g |                 | 1,70 | 2,00E-03 | <i>STF2</i>    | Protein involved in resistance to desiccation stress; STF2p exhibits antioxidant properties, and its overexpression prevents ROS accumulation and apoptosis; binds to the F0 sector of mitochondrial F1F0 ATPase in vitro and is proposed to modulate the inhibitory action of Inh1p and Stf1p                                                                                                       |
| CAGLOJ07612g | <i>CgZWF1</i>   | 1,70 | 1,01E-04 | <i>ZWF1</i>    | Glucose-6-phosphate dehydrogenase (G6PD), catalyzes the first step of the pentose phosphate pathway; involved in adapting to oxidative stress; homolog of the human G6PD which is deficient in patients with hemolytic anemia                                                                                                                                                                        |
| CAGLOE05170g | <i>CgGRE2</i>   | 1,70 | 3,52E-04 | -              | Putative methylglyoxal reductase (NADPH-dependent)                                                                                                                                                                                                                                                                                                                                                   |
| CAGLO803839g | <i>CgMET3</i>   | 1,69 | 7,22E-04 | <i>MET3</i>    | ATP sulfurylase, catalyzes the primary step of intracellular sulfate activation, essential for assimilatory reduction of sulfate to sulfide, involved in methionine metabolism                                                                                                                                                                                                                       |
| CAGLOF06369g |                 | 1,68 | 1,92E-03 | <i>LHS1</i>    | Molecular chaperone of the endoplasmic reticulum lumen, involved in polypeptide translocation and folding; nucleotide exchange factor for the ER luminal Hsp70 chaperone Kar2p; regulated by the unfolded protein response pathway                                                                                                                                                                   |
| CAGLOJ04466g |                 | 1,68 | 5,83E-03 | <i>PUN1</i>    | Plasma membrane protein with a role in cell wall integrity; co-localizes with Sur7p in punctate membrane patches; null mutant displays decreased thermotolerance; transcription induced upon cell wall damage and metal ion stress                                                                                                                                                                   |
| CAGLOM07634g |                 | 1,66 | 5,76E-05 | <i>SOK2</i>    | Nuclear protein that plays a regulatory role in the cyclic AMP (cAMP)-dependent protein kinase (PKA) signal transduction pathway; negatively regulates pseudohyphal differentiation; homologous to several transcription factors                                                                                                                                                                     |
| CAGLOM08492g | <i>CgPIR3</i>   | 1,66 | 5,48E-05 | <i>PIR1</i>    | O-glycosylated protein required for cell wall stability; attached to the cell wall via beta-1,3-glucan; mediates mitochondrial translocation of Apn1p; expression regulated by the cell integrity pathway and by Swi5p during the cell cycle                                                                                                                                                         |
| CAGLOA03102g | <i>CgARO10</i>  | 1,66 | 8,80E-03 | <i>ARO10</i>   | Phenylpyruvate decarboxylase, catalyzes decarboxylation of phenylpyruvate to phenylacetaldehyde, which is the first specific step in the Ehrlich pathway                                                                                                                                                                                                                                             |
| CAGLOE04356g |                 | 1,65 | 4,87E-04 | <i>SOD2</i>    | Mitochondrial manganese superoxide dismutase, protects cells against oxygen toxicity; phosphorylated                                                                                                                                                                                                                                                                                                 |
| CAGLOM13651g |                 | 1,62 | 3,40E-02 | <i>PRC1</i>    | Vacuolar carboxypeptidase Y (protease C; CPY), broad-specificity C-terminal exopeptidase involved in non-specific protein degradation in the vacuole; member of the serine carboxypeptidase family                                                                                                                                                                                                   |
| CAGLOE01177g | <i>CgCPR1</i>   | 1,62 | 3,07E-04 | <i>CPR1</i>    | Cytoplasmic peptidyl-prolyl cis-trans isomerase (cyclophilin), catalyzes the cis-trans isomerization of peptide bonds N-terminal to proline residues; binds the drug cyclosporin A                                                                                                                                                                                                                   |
| CAGLOG06006g |                 | 1,62 | 4,76E-04 | <i>YHR138C</i> | Putative protein of unknown function; has similarity to Pbi2p; double null mutant lacking Pbi2p and Yhr138p exhibits highly fragmented vacuoles                                                                                                                                                                                                                                                      |
| CAGLOL0495g  | <i>CgHSC2</i>   | 1,61 | 7,62E-04 | <i>HSC2</i>    | Cytoplasmic chaperone of the Hsp90 family, redundant in function and nearly identical with Hsp82p, and together they are essential; expressed constitutively at 10-fold higher basal levels than HSP82 and induced 2-3 fold by heat shock                                                                                                                                                            |
| CAGLOL02497g | <i>CgFBA1</i>   | 1,59 | 1,33E-04 | <i>FBA1</i>    | Fructose 1,6-bisphosphate aldolase, required for glycolysis and gluconeogenesis; catalyzes conversion of fructose 1,6 bisphosphate to glyceraldehyde-3-P and dihydroxyacetone-P; locates to mitochondrial outer surface upon oxidative stress                                                                                                                                                        |
| CAGLOM12386g |                 | 1,59 | 4,80E-03 | <i>MMF1</i>    | Mitochondrial protein required for transamination of isoleucine but not of valine or leucine; may regulate specificity of branched-chain transaminases Bat1p and Bat2p; interacts genetically with mitochondrial ribosomal protein genes                                                                                                                                                             |
| CAGLOD01298g | <i>CgTKL1</i>   | 1,59 | 4,10E-03 | <i>TKL1</i>    | Transketolase, similar to Tk2p; catalyzes conversion of xylulose-5-phosphate and ribose-5-phosphate to sedoheptulose-7-phosphate and glyceraldehyde-3-phosphate in the pentose phosphate pathway; needed for synthesis of aromatic amino acids                                                                                                                                                       |
| CAGLOL06974g |                 | 1,57 | 1,08E-03 | <i>YDL086W</i> | Putative protein of unknown function; the authentic, non-tagged protein is detected in highly purified mitochondria in high-throughput studies; YDL086W is not an essential gene                                                                                                                                                                                                                     |

|              |                |      |          |         |                                                                                                                                                                                                                                                                                                                                                                                                                                |
|--------------|----------------|------|----------|---------|--------------------------------------------------------------------------------------------------------------------------------------------------------------------------------------------------------------------------------------------------------------------------------------------------------------------------------------------------------------------------------------------------------------------------------|
| CAGL0L06072g |                | 1,56 | 3,02E-04 | YER130C | Protein of unknown function; transcription is regulated by Haa1p, Sok2p and Zap1p transcriptional activators; computational analysis suggests a role as a transcription factor; <i>C. albicans</i> homolog (MNL1) plays a role in adaptation to stress                                                                                                                                                                         |
| CAGL0D05280g |                | 1,56 | 1,56E-03 | MET10   | Subunit alpha of assimilatory sulfite reductase, which converts sulfite into sulfide                                                                                                                                                                                                                                                                                                                                           |
| CAGL0B00704g | <i>CgPDI1</i>  | 1,56 | 1,47E-04 | PDI1    | Protein disulfide isomerase; multifunctional protein resident in the endoplasmic reticulum lumen, essential for the formation of disulfide bonds in secretory and cell-surface proteins, unscrambles non-native disulfide bonds; forms a complex with Min1p that has exomannosidase activity, processing unfolded protein-bound Man8GlcNAc2 oligosaccharides to Man7GlcNAc2 which promotes degradation in the unfolded protein |
| CAGL0M05995g |                | 1,55 | 4,65E-04 | PET10   | Protein of unknown function that co-purifies with lipid particles; expression pattern suggests a role in respiratory growth; computational analysis of large-scale protein-protein interaction data suggests a role in ATP/ADP exchange                                                                                                                                                                                        |
| CAGL0M00374g |                | 1,55 | 3,61E-04 | MET5    | Sulfite reductase beta subunit, involved in amino acid biosynthesis, transcription repressed by methionine                                                                                                                                                                                                                                                                                                                     |
| CAGL0F07557g |                | 1,55 | 3,69E-03 | YJU2    | Essential protein required for pre-mRNA splicing; associates transiently with the spliceosomal NTC (nineteen complex) and acts after Prp2p to promote the first catalytic reaction of splicing                                                                                                                                                                                                                                 |
| CAGL0H08393g |                | 1,55 | 1,16E-03 | BAP2    | High-affinity leucine permease, functions as a branched-chain amino acid permease involved in the uptake of leucine, isoleucine and valine; contains 12 predicted transmembrane domains                                                                                                                                                                                                                                        |
| CAGL0I07821g |                | 1,52 | 3,27E-04 | DUF1    | Ubiquitin-binding protein of unknown function; contains one WD40 repeat in a beta-propeller fold; green fluorescent protein (GFP)-fusion protein localizes to the cytoplasm; homolog of human WDR48/UAF1, which is involved in regulating the Fanconi anemia pathway; deletion mutant is sensitive to various chemicals including phenanthroline, sanguinarine, and nordihydroguaiaretic acid                                  |
| CAGL0I06743g |                | 1,52 | 1,36E-04 | FTR1    | High affinity iron permease involved in the transport of iron across the plasma membrane; forms complex with Fet3p; expression is regulated by iron                                                                                                                                                                                                                                                                            |
| CAGL0L10186g |                | 1,51 | 6,61E-02 | YOR052C | Nuclear protein of unknown function; expression induced by nitrogen limitation in a GLN3, GAT1-independent manner and by weak acid; transcriptionally regulated by Rpn4p along with proteasome subunit genes; putative ortholog of human AIRAP, which stimulates proteasome activity in response to arsenic                                                                                                                    |
| CAGL0C02541g |                | 1,51 | 9,38E-04 | BDF1    | Protein involved in transcription initiation at TATA-containing promoters; associates with the basal transcription factor TFIID; contains two bromodomains; corresponds to the C-terminal region of mammalian TAF1; redundant with Bdf1p                                                                                                                                                                                       |
| CAGL0C04785g |                | 1,51 | 1,56E-03 | YJR115W | Putative protein of unknown function                                                                                                                                                                                                                                                                                                                                                                                           |
| CAGL0I10384g | <i>CgTPO3</i>  | 1,49 | 3,53E-04 | TPO2    | Polyamine transport protein specific for spermine; localizes to the plasma membrane; transcription of TPO2 is regulated by Haa1p; member of the major facilitator superfamily                                                                                                                                                                                                                                                  |
| CAGL0I01870g |                | 1,48 | 1,06E-03 | PMR1    | High affinity Ca <sup>2+</sup> /Mn <sup>2+</sup> P-type ATPase required for Ca <sup>2+</sup> and Mn <sup>2+</sup> transport into Golgi; involved in Ca <sup>2+</sup> dependent protein sorting and processing; mutations in human homolog ATP2C1 cause acantholytic skin condition Hailey-Hailey disease                                                                                                                       |
| CAGL0K01727g | <i>CgRPN4</i>  | 1,47 | 7,14E-04 | RPN4    | Transcription factor that stimulates expression of proteasome genes; Rpn4p levels are in turn regulated by the 26S proteasome in a negative feedback control mechanism; RPN4 is transcriptionally regulated by various stress responses                                                                                                                                                                                        |
| CAGL0F04807g |                | 1,47 | 2,66E-03 | OM45    | Protein of unknown function, major constituent of the mitochondrial outer membrane; located on the outer (cytosolic) face of the outer membrane                                                                                                                                                                                                                                                                                |
| CAGL0D05434g |                | 1,45 | 1,08E-03 | -       | Has domain(s) with predicted sequence-specific DNA binding activity                                                                                                                                                                                                                                                                                                                                                            |
| CAGL0K04301g |                | 1,45 | 9,69E-04 | FMP48   | Putative protein of unknown function; the authentic, non-tagged protein is detected in highly purified mitochondria in high-throughput studies; induced by treatment with 8-methoxypsoralen and UVA irradiation                                                                                                                                                                                                                |
| CAGL0F04895g |                | 1,45 | 7,85E-03 | GPH1    | Non-essential glycogen phosphorylase required for the mobilization of glycogen, activity is regulated by cyclic AMP-mediated phosphorylation, expression is regulated by stress-response elements and by the HOG MAP kinase pathway                                                                                                                                                                                            |
| CAGL0K04125g |                | 1,45 | 2,48E-04 | ACB1    | Acyl-CoA-binding protein, transports newly synthesized acyl-CoA esters from fatty acid synthetase (Fas1p-Fas2p) to acyl-CoA-consuming processes; subject to starvation-induced, Grh1p-mediated unconventional secretion                                                                                                                                                                                                        |
| CAGL0I11968g | <i>CgEPA15</i> | 1,44 | 2,57E-04 | FLO5    | Putative adhesin-like cell wall protein                                                                                                                                                                                                                                                                                                                                                                                        |
| CAGL0K00715g | <i>CgRTA1</i>  | 1,44 | 2,07E-04 | YLR046C | Putative membrane protein; member of the fungal lipid-translocating exporter (LTE) family of proteins; transcription is activated by paralogous transcription factors Yrm1p and Yrr1p along with genes involved in multidrug resistance                                                                                                                                                                                        |
| CAGL0H09130g |                | 1,43 | 7,21E-04 | MNN4    | Putative positive regulator of mannosylphosphatase (Mnn6p), involved in mannosylphosphorylation of N-linked oligosaccharides; expression increases in late-logarithmic and stationary growth phases                                                                                                                                                                                                                            |
| CAGL0I09900g |                | 1,43 | 4,22E-04 | POR1    | Mitochondrial porin (voltage-dependent anion channel), outer membrane protein required for the maintenance of mitochondrial osmotic stability and mitochondrial membrane permeability; phosphorylated                                                                                                                                                                                                                          |
| CAGL0I02200g | <i>CgSOL3</i>  | 1,42 | 3,94E-03 | SOL3    | 6-phosphogluconolactonase, catalyzes the second step of the pentose phosphate pathway; weak multicopy suppressor of <i>fos1-1</i> mutation; homologous to <i>Sol2p</i> and <i>Sol1p</i>                                                                                                                                                                                                                                        |
| CAGL0D06424g | <i>CgACO1</i>  | 1,42 | 9,34E-04 | ACO1    | Aconitase, required for the tricarboxylic acid (TCA) cycle and also independently required for mitochondrial genome maintenance; phosphorylated; component of the mitochondrial nucleoid; mutation leads to glutamate auxotrophy                                                                                                                                                                                               |
| CAGL0G05632g |                | 1,42 | 4,21E-03 | YDL218W | Putative protein of unknown function; YDL218W transcription is regulated by <i>Azf1p</i> and induced by starvation and aerobic conditions; expression also induced in cells treated with the mycotxin patulin                                                                                                                                                                                                                  |
| CAGL0L06424g |                | 1,42 | 6,33E-03 | YDR134C | ANNOTATED BY YGOB -                                                                                                                                                                                                                                                                                                                                                                                                            |
| CAGL0M02211g | <i>CgPEP4</i>  | 1,41 | 3,34E-03 | PEP4    | Vacuolar aspartyl protease (proteinase A), required for the posttranslational precursor maturation of vacuolar proteinases; important for protein turnover after oxidative damage; synthesized as a zymogen, self-activates                                                                                                                                                                                                    |
| CAGL0H09856g |                | 1,41 | 1,14E-02 | HHT1    | Histone H3, core histone protein required for chromatin assembly, part of heterochromatin-mediated telomeric and HM silencing; one of two identical histone H3 proteins (see HHT2); regulated by acetylation, methylation, and phosphorylation                                                                                                                                                                                 |
| CAGL0I06050g |                | 1,41 | 1,70E-04 | YGP1    | Cell wall-related secretory glycoprotein; induced by nutrient deprivation-associated growth arrest and upon entry into stationary phase; may be involved in adaptation prior to stationary phase entry; has similarity to <i>Sps100p</i>                                                                                                                                                                                       |
| CAGL0I02508g |                | 1,41 | 8,21E-03 | CTR2    | Putative low-affinity copper transporter of the vacuolar membrane; mutation confers resistance to toxic copper concentrations, while overexpression confers resistance to copper starvation                                                                                                                                                                                                                                    |
| CAGL0A03212g |                | 1,41 | 4,98E-04 | ATO3    | Plasma membrane protein, regulation pattern suggests a possible role in export of ammonia from the cell; phosphorylated in mitochondria; member of the TC 9.8.33 YaaH family of putative transporters                                                                                                                                                                                                                          |
| CAGL0E05566g |                | 1,41 | 2,19E-03 | TYE7    | Serine-rich protein that contains a basic-helix-loop-helix (bHLH) DNA binding motif; binds E-boxes of glycolytic genes and contributes to their activation; may function as a transcriptional activator in Ty1-mediated gene expression                                                                                                                                                                                        |
| CAGL0K09130g |                | 1,41 | 8,28E-03 | SRL1    | Mannoprotein that exhibits a tight association with the cell wall, required for cell wall stability in the absence of GPI-anchored mannoproteins; has a high serine-threonine content; expression is induced in cell wall mutants                                                                                                                                                                                              |
| CAGL0I10296g |                | 1,40 | 5,22E-02 | APJ1    | Putative chaperone of the HSP40 (DNAJ) family; overexpression interferes with propagation of the [Psi <sup>+</sup> ] prion; the authentic, non-tagged protein is detected in highly purified mitochondria in high-throughput studies                                                                                                                                                                                           |
| CAGL0I03960g |                | 1,40 | 2,78E-04 | IWTM2   | Transcriptional modulator involved in regulation of meiosis, silencing, and expression of RNR genes; involved in response to replication stress; contains WD repeats                                                                                                                                                                                                                                                           |
| CAGL0L07920g |                | 1,40 | 8,14E-03 | PET18   | Protein of unknown function, has weak similarity to proteins involved in thiamin metabolism; expression is induced in the absence of thiamin                                                                                                                                                                                                                                                                                   |
| CAGL0E05456g |                | 1,40 | 6,21E-04 | YOR338W | Putative protein of unknown function; YOR338W transcription is regulated by <i>Azf1p</i> and its transcript is a specific target of the G protein effector <i>Scp160p</i> ; identified as being required for sporulation in a high-throughput mutant screen                                                                                                                                                                    |
| CAGL0L02937g | <i>CgHIS3</i>  | 1,38 | 5,86E-04 | HIS3    | Imidazoleglycerol-phosphate dehydratase, catalyzes the sixth step in histidine biosynthesis; mutations cause histidine auxotrophy and sensitivity to Cu, Co, and Ni salts; transcription is regulated by general amino acid control via <i>Gcn4p</i>                                                                                                                                                                           |
| CAGL0I08316g |                | 1,38 | 9,99E-03 | MET2    | L-homoserine-O-acetyltransferase, catalyzes the conversion of homoserine to O-acetyl homoserine which is the first step of the methionine biosynthetic pathway                                                                                                                                                                                                                                                                 |

|              |                 |      |          |                  |                                                                                                                                                                                                                                                                                                                       |
|--------------|-----------------|------|----------|------------------|-----------------------------------------------------------------------------------------------------------------------------------------------------------------------------------------------------------------------------------------------------------------------------------------------------------------------|
| CAGL0A02299g |                 | 1,38 | 4,07E-04 | -                | Unknown                                                                                                                                                                                                                                                                                                               |
| CAGL0H07667g |                 | 1,37 | 5,81E-03 | <i>PDE1</i>      | Low-affinity cyclic AMP phosphodiesterase, controls glucose and intracellular acidification-induced cAMP signaling, target of the cAMP-protein kinase A (PKA) pathway; glucose induces transcription and inhibits translation                                                                                         |
| CAGL0L01837g | <i>CgVPS24</i>  | 1,37 | 5,25E-03 | <i>VPS24</i>     | One of four subunits of the endosomal sorting complex required for transport III (ESCRT-III); forms an ESCRT-III subcomplex with Did4p; involved in the sorting of transmembrane proteins into the multivesicular body (MVB) pathway                                                                                  |
| CAGL0D04092g | <i>CgDOG2</i>   | 1,36 | 6,89E-03 | -                | 2-deoxyglucose-6-phosphate phosphatase                                                                                                                                                                                                                                                                                |
| CAGL0A04081g |                 | 1,36 | 1,77E-03 | <i>YLR194C</i>   | Structural constituent of the cell wall attached to the plasma membrane by a GPI-anchor; expression is upregulated in response to cell wall stress                                                                                                                                                                    |
| CAGL0I01078g | <i>CgPFY1</i>   | 1,36 | 3,79E-04 | <i>PFY1</i>      | Profilin, binds actin, phosphatidylinositol 4,5-bisphosphate, and polyproline regions; involved in cytoskeleton organization; required for normal timing of actin polymerization in response to thermal stress                                                                                                        |
| CAGL0C01793g |                 | 1,34 | 6,75E-03 | <i>OM14</i>      | Integral mitochondrial outer membrane protein; abundance is decreased in cells grown in glucose relative to other carbon sources; appears to contain 3 alpha-helical transmembrane segments; ORF encodes a 97-basepair intron                                                                                         |
| CAGL0H01375g | <i>CgSUR2</i>   | 1,34 | 9,84E-04 | <i>SUR2</i>      | Sphinganine C4-hydroxylase, catalyses the conversion of sphinganine to phytosphingosine in sphingolipid biosynthesis                                                                                                                                                                                                  |
| CAGL0M02101g |                 | 1,33 | 5,10E-04 | <i>PET20</i>     | Mitochondrial protein, required for respiratory growth under some conditions and for stability of the mitochondrial genome                                                                                                                                                                                            |
| CAGL0L08426g | <i>CgSUE1</i>   | 1,32 | 4,26E-03 | <i>SUE1</i>      | Mitochondrial protein required for degradation of unstable forms of cytochrome c                                                                                                                                                                                                                                      |
| CAGL0I04554g | <i>CgGRX7</i>   | 1,31 | 1,18E-03 | <i>GRX7</i>      | Cis-golgi localized monothiol glutaredoxin; more similar in activity to dithiol than other monothiol glutaredoxins; involved in the oxidative stress response; does not bind metal ions; functional overlap with GRX6                                                                                                 |
| CAGL0H09834g |                 | 1,31 | 3,98E-04 | <i>HHF1</i>      | Histone H4, core histone protein required for chromatin assembly and chromosome function; one of two identical histone proteins (see also HHF2); contributes to telomeric silencing; N-terminal domain involved in maintaining genomic integrity                                                                      |
| CAGL0C04136g |                 | 1,30 | 5,00E-04 | <i>HHF1</i>      | Histone H4, core histone protein required for chromatin assembly and chromosome function; one of two identical histone proteins (see also HHF2); contributes to telomeric silencing; N-terminal domain involved in maintaining genomic integrity                                                                      |
| CAGL0F04125g |                 | 1,29 | 5,57E-04 | <i>YBL029W</i>   | Non-essential protein of unknown function                                                                                                                                                                                                                                                                             |
| CAGL0K07007g |                 | 1,29 | 4,55E-03 | <i>YBR238C</i>   | Mitochondrial membrane protein with similarity to Rmd9p; not required for respiratory growth but causes a synthetic respiratory defect in combination with rmd9 mutations; transcriptionally up-regulated by TOR; deletion increases life span                                                                        |
| CAGL0L12342g |                 | 1,29 | 4,80E-04 | <i>SUL2</i>      | High affinity sulfate permease; sulfate uptake is mediated by specific sulfate transporters Sul1p and Sul2p, which control the concentration of endogenous activated sulfate intermediates                                                                                                                            |
| CAGL0H05445g | <i>CgPGI1</i>   | 1,29 | 4,81E-04 | <i>PGI1</i>      | Glycolytic enzyme phosphoglucose isomerase, catalyzes the interconversion of glucose-6-phosphate and fructose-6-phosphate; required for cell cycle progression and completion of the gluconeogenic events of sporulation                                                                                              |
| CAGL0G09977g | <i>CgGDB1</i>   | 1,28 | 7,11E-03 | <i>GDB1</i>      | Glycogen debranching enzyme containing glucanotransferase and alpha-1,6-amyloglucosidase activities, required for glycogen degradation; phosphorylated in mitochondria; activity is inhibited by Igd1p                                                                                                                |
| CAGL0C04587g |                 | 1,28 | 4,03E-04 | <i>YI098C</i>    | Putative protein of unknown function; the authentic, non-tagged protein is detected in highly purified mitochondria in high-throughput studies                                                                                                                                                                        |
| CAGL0F07359g |                 | 1,27 | 8,90E-04 | <i>YGL117W</i>   | Putative protein of unknown function                                                                                                                                                                                                                                                                                  |
| CAGL0I01331g |                 | 1,27 | 3,37E-03 | -                | Unknown                                                                                                                                                                                                                                                                                                               |
| CAGL0C04114g | <i>CgHHT2</i>   | 1,26 | 2,74E-03 | <i>HHT1</i>      | Histone H3, core histone protein required for chromatin assembly, part of heterochromatin-mediated telomeric and HM silencing; one of two identical histone H3 proteins (see HHT2); regulated by acetylation, methylation, and phosphorylation                                                                        |
| CAGL0D02618g | <i>CgPEX11</i>  | 1,26 | 6,22E-03 | <i>PEX11</i>     | Peroxisomal membrane protein required for medium-chain fatty acid oxidation and peroxisome proliferation, possibly by inducing membrane curvature; localization regulated by phosphorylation; transcription regulated by Adr1p and Pip2p-Oaf1p                                                                        |
| CAGL0M00132g | <i>CgEPA12</i>  | 1,26 | 2,88E-02 | <i>FLO1</i>      | Putative adhesin-like cell wall protein                                                                                                                                                                                                                                                                               |
| CAGL0H00418g |                 | 1,26 | 4,22E-03 | -                | Unknown                                                                                                                                                                                                                                                                                                               |
| CAGL0G05049g |                 | 1,24 | 2,61E-03 | <i>AIM7</i>      | Protein that interacts with Arp2/3 complex to stimulate actin filament debranching and inhibit actin nucleation; has similarity to Cof1p and also to human glioma maturation factor (GMF); null mutant displays elevated mitochondrial genome loss                                                                    |
| CAGL0G02937g |                 | 1,24 | 9,86E-03 | -                | Ortholog(s) have pyruvate decarboxylase activity                                                                                                                                                                                                                                                                      |
| CAGL0B00594g |                 | 1,24 | 2,26E-03 | <i>YCL048W-A</i> | Putative protein of unknown function                                                                                                                                                                                                                                                                                  |
| CAGL0F08041g | <i>CgPFK1</i>   | 1,23 | 5,56E-04 | <i>PFK1</i>      | Alpha subunit of heterooctameric phosphofructokinase involved in glycolysis, indispensable for anaerobic growth, activated by fructose-2,6-bisphosphate and AMP, mutation inhibits glucose induction of cell cycle-related genes                                                                                      |
| CAGL0A03718g |                 | 1,23 | 1,70E-03 | <i>CHC1</i>      | Clathrin heavy chain, subunit of the major coat protein involved in intracellular protein transport and endocytosis; two heavy chains form the clathrin triskelion structural component; the light chain (CLC1) is thought to regulate function                                                                       |
| CAGL0B02755g |                 | 1,23 | 6,93E-03 | <i>YLR361C-A</i> | Putative protein of unknown function                                                                                                                                                                                                                                                                                  |
| CAGL0E01243g |                 | 1,23 | 1,09E-03 | <i>CTH1</i>      | Member of the CCCC zinc finger family; has similarity to mammalian Tis11 protein, which activates transcription and also has a role in mRNA degradation; may function with Tis11p in iron homeostasis                                                                                                                 |
| CAGL0C02893g |                 | 1,22 | 1,21E-03 | <i>HRK1</i>      | Protein kinase implicated in activation of the plasma membrane H(+)-ATPase Pma1p in response to glucose metabolism; plays a role in ion homeostasis                                                                                                                                                                   |
| CAGL0I08305g |                 | 1,22 | 8,44E-03 | <i>YAT2</i>      | Carnitine acetyltransferase; has similarity to Yat1p, which is a carnitine acetyltransferase associated with the mitochondrial outer membrane                                                                                                                                                                         |
| CAGL0L06776g |                 | 1,22 | 3,27E-04 | <i>GAT2</i>      | Protein containing GATA family zinc finger motifs; similar to Gln3p and Dal80p; expression repressed by leucine                                                                                                                                                                                                       |
| CAGL0M04675g |                 | 1,22 | 3,52E-03 | <i>RDL1</i>      | Protein of unknown function containing a rhodanese-like domain; localized to the mitochondrial outer membrane                                                                                                                                                                                                         |
| CAGL0I08613g | <i>CgDUR3</i>   | 1,22 | 3,06E-03 | <i>DUR3</i>      | Putative plasma membrane polyamine transporter                                                                                                                                                                                                                                                                        |
| CAGL0E03674g | <i>CgTPO1_2</i> | 1,22 | 9,53E-04 | <i>TPO1</i>      | Polyamine transporter that recognizes spermine, putrescine, and spermidine; catalyzes uptake of polyamines at alkaline pH and excretion at acidic pH; phosphorylation enhances activity and sorting to the plasma membrane                                                                                            |
| CAGL0E03652g |                 | 1,21 | 9,26E-04 | <i>ISA1</i>      | Protein required for maturation of mitochondrial [4Fe-4S] proteins; functions in a complex with Isa2p and possibly Iba57p; isa1 deletion causes loss of mitochondrial DNA and respiratory deficiency; depletion reduces growth on nonfermentable carbon sources; functional ortholog of bacterial A-type ISC proteins |
| CAGL0K03069g |                 | 1,21 | 4,94E-03 | <i>IRC21</i>     | Putative protein of unknown function; may be involved in resistance to carboplatin and cisplatin; null mutant displays increase in spontaneous Rad52p foci; contains a lipid-binding domain and binds cardiolipin in a large-scale study                                                                              |
| CAGL0C02739g |                 | 1,21 | 2,88E-03 | <i>FUN14</i>     | Mitochondrial protein of unknown function                                                                                                                                                                                                                                                                             |

|               |                |      |          |                  |                                                                                                                                                                                                                                                                                                                      |
|---------------|----------------|------|----------|------------------|----------------------------------------------------------------------------------------------------------------------------------------------------------------------------------------------------------------------------------------------------------------------------------------------------------------------|
| CAGLOG01870g  |                | 1,20 | 1,97E-03 | -                | -                                                                                                                                                                                                                                                                                                                    |
| CAGL006204g   | <i>CgPIR1</i>  | 1,20 | 3,04E-03 | <i>YIL160C</i>   | Putative protein of unknown function; member of the PIR (proteins with internal repeats) family of cell wall proteins; non-essential gene that is required for sporulation; mRNA is weakly cell cycle regulated, peaking in mitosis                                                                                  |
| CAGL004191g   |                | 1,19 | 1,07E-03 | <i>BUD9</i>      | Protein involved in bud-site selection; mutant has increased aneuploidy tolerance; diploid mutants display a unipolar budding pattern instead of the wild-type bipolar pattern, and bud at the distal pole                                                                                                           |
| CAGL004521g   |                | 1,19 | 1,42E-03 | <i>ECM13</i>     | Non-essential protein of unknown function; induced by treatment with 8-methoxypsoralen and UVA irradiation                                                                                                                                                                                                           |
| CAGL002574g   |                | 1,18 | 2,21E-03 | <i>OYE2</i>      | Conserved NADPH oxidoreductase containing flavin mononucleotide (FMN), homologous to Oye3p with different ligand binding and catalytic properties; may be involved in sterol metabolism, oxidative stress response, and programmed cell death                                                                        |
| CAGL003597g   | <i>CgABP1</i>  | 1,18 | 2,77E-03 | <i>ABP1</i>      | Actin-binding protein of the cortical actin cytoskeleton, important for activation of the Arp2/3 complex that plays a key role in cytoskeleton organization; phosphorylation within its PRR (Proline-Rich Region), mediated by Cdc28p and Pho85p, protects Abp1p from proteolysis mediated by its own PEST sequences |
| CAGL009273g   |                | 1,17 | 8,75E-03 | <i>SNG1</i>      | Protein involved in resistance to nitrosoguanidine (MNNG) and 6-azauracil (6-AU); expression is regulated by transcription factors involved in multidrug resistance                                                                                                                                                  |
| CAGL005830g   |                | 1,17 | 2,06E-03 | <i>CRP1</i>      | Protein that binds to cruciform DNA structures                                                                                                                                                                                                                                                                       |
| CAGL008844g   |                | 1,16 | 4,65E-03 | <i>ASG1</i>      | Zinc cluster protein proposed to function as a transcriptional regulator involved in the stress response; null mutants have a respiratory deficiency, calcofluor white sensitivity and slightly increased cycloheximide resistance                                                                                   |
| CAGL008591g   |                | 1,16 | 2,25E-03 | <i>YER158C</i>   | Protein of unknown function, has similarity to Afr1p; potentially phosphorylated by Cdc28p                                                                                                                                                                                                                           |
| CAGL011176g   |                | 1,16 | 6,84E-03 | <i>TDA7</i>      | Cell cycle-regulated gene of unknown function, promoter bound by Fkh2p; null mutant is sensitive to expression of the top1-T722A allele                                                                                                                                                                              |
| CAGL004917g   |                | 1,15 | 3,22E-03 | <i>PIG1</i>      | Putative targeting subunit for the type-1 protein phosphatase Gic7p that tethers it to the Gsy2p glycogen synthase                                                                                                                                                                                                   |
| CAGL006655g   |                | 1,15 | 7,91E-04 | <i>HHT2</i>      | Histone H3, core histone protein required for chromatin assembly, part of heterochromatin-mediated telomeric and HM silencing; one of two identical histone H3 proteins (see HHT1); regulated by acetylation, methylation, and phosphorylation                                                                       |
| CAGL002849g   |                | 1,15 | 9,30E-03 | <i>UIP4</i>      | Protein that interacts with Ulp1p, a Ubl (ubiquitin-like protein)-specific protease for Smt3p protein conjugates; detected in a phosphorylated state in the mitochondrial outer membrane; also detected in ER and nuclear envelope                                                                                   |
| CAGL010516g   |                | 1,14 | 7,09E-04 | <i>YGR130C</i>   | Component of the eisosome with unknown function; GFP-fusion protein localizes to the cytoplasm; specifically phosphorylated in vitro by mammalian diphosphoinositol pentakisphosphate (IP7)                                                                                                                          |
| CAGL001100g   |                | 1,14 | 3,08E-03 | <i>TFS1</i>      | Protein that interacts with and inhibits carboxypeptidase Y and Ira2p; phosphatidylethanolamine-binding protein (PEBP) family member; targets to vacuolar membranes during stationary phase; acetylated by NatB N-terminal acetyltransferase                                                                         |
| CAGL001969g   |                | 1,14 | 4,94E-03 | <i>SMF1</i>      | Divalent metal ion transporter with a broad specificity for di-valent and tri-valent metals; post-translationally regulated by levels of metal ions; member of the Nramp family of metal transport proteins                                                                                                          |
| CAGL006017g   | <i>CgLYS7</i>  | 1,14 | 1,45E-03 | <i>CCS1</i>      | Copper chaperone for superoxide dismutase Sod1p, involved in oxidative stress protection; Met-X-Cys-X2-Cys motif within the N-terminal portion is involved in insertion of copper into Sod1p under conditions of copper deprivation                                                                                  |
| CAGL008206g   |                | 1,13 | 2,32E-03 | <i>YIL171C</i>   | GPI-anchored cell wall protein of unknown function; induced in response to cell wall damaging agents and by mutations in genes involved in cell wall biogenesis; sequence similarity to YBR162C/TOS1, a covalently bound cell wall protein                                                                           |
| CAGL006237g   |                | 1,13 | 8,69E-03 | <i>HHT1</i>      | Acyl-coenzymeA:ethanol O-acyltransferase that plays a minor role in medium-chain fatty acid ethyl ester biosynthesis; possesses short-chain esterase activity; localizes to lipid particles and the mitochondrial outer membrane                                                                                     |
| CAGL003993g   |                | 1,13 | 2,78E-03 | <i> CIT1</i>     | Citrate synthase, catalyzes the condensation of acetyl coenzyme A and oxaloacetate to form citrate; the rate-limiting enzyme of the TCA cycle; nuclear encoded mitochondrial protein                                                                                                                                 |
| CAGL011154g   |                | 1,13 | 2,99E-03 | <i>NTE1</i>      | Serine esterase, homolog of human neuropathy target esterase (NTE); Nte1p-mediated phosphatidylcholine turnover influences transcription factor Opi1p localization, affecting transcriptional regulation of phospholipid biosynthesis genes                                                                          |
| CAGL009042g   |                | 1,13 | 7,85E-02 | <i>AFT2</i>      | Iron-regulated transcriptional activator; activates genes involved in intracellular iron use and required for iron homeostasis and resistance to oxidative stress; similar to Aft1p                                                                                                                                  |
| CAGL00804917g |                | 1,12 | 4,79E-03 | <i>IDP2</i>      | Cytosolic NADP-specific isocitrate dehydrogenase, catalyzes oxidation of isocitrate to alpha-ketoglutarate; levels are elevated during growth on non-fermentable carbon sources and reduced during growth on glucose                                                                                                 |
| CAGL001177g   | <i>CgFRDS1</i> | 1,12 | 6,56E-04 | <i>YEL047C</i>   | Soluble fumarate reductase, required with isoenzyme Osm1p for anaerobic growth; may interact with ribosomes, based on co-purification experiments; authentic, non-tagged protein is detected in purified mitochondria in high-throughput studies                                                                     |
| CAGL011770g   | <i>CgPLB1</i>  | 1,11 | 2,35E-03 | <i>PLB1</i>      | Phospholipase B (lysophospholipase) involved in lipid metabolism, required for deacylation of phosphatidylcholine and phosphatidylethanolamine but not phosphatidylinositol                                                                                                                                          |
| CAGL011110g   |                | 1,11 | 1,65E-03 | <i>YIRO03C</i>   | Putative protein of unknown function; detected in highly purified mitochondria in high-throughput studies; predicted to be involved in ribosome biogenesis                                                                                                                                                           |
| CAGL005203g   |                | 1,11 | 4,33E-03 | <i>YOP1</i>      | Membrane protein that interacts with Yip1p to mediate membrane traffic; interacts with Sey1p to maintain ER morphology; overexpression leads to cell death and accumulation of internal cell membranes                                                                                                               |
| CAGL002673g   |                | 1,11 | 6,59E-04 | <i>IDH1</i>      | Subunit of mitochondrial NAD(+)-dependent isocitrate dehydrogenase, which catalyzes the oxidation of isocitrate to alpha-ketoglutarate in the TCA cycle                                                                                                                                                              |
| CAGL0011000g  |                | 1,10 | 2,23E-03 | <i>YNR034W-A</i> | Putative protein of unknown function; expression is regulated by Msn2p/Msn4p                                                                                                                                                                                                                                         |
| CAGL003531g   |                | 1,10 | 6,87E-03 | <i>SPR6</i>      | Protein of unknown function, expressed during sporulation; not required for sporulation, but gene exhibits genetic interactions with other genes required for sporulation                                                                                                                                            |
| CAGL004268g   |                | 1,10 | 5,31E-03 | <i>ACH1</i>      | Protein with CoA transferase activity, particularly for CoASH transfer from succinyl-CoA to acetate; has minor acetyl-CoA-hydrolase activity; phosphorylated; required for acetate utilization and for diploid pseudohyphal growth                                                                                   |
| CAGL006380g   |                | 1,09 | 3,50E-03 | <i>INH1</i>      | Protein that inhibits ATP hydrolysis by the F1F0-ATP synthase; inhibitory function is enhanced by stabilizing proteins Stf1p and Stf2p; has similarity to Stf1p; has a calmodulin-binding motif and binds calmodulin in vitro                                                                                        |
| CAGL000286g   | <i>CgGAS1</i>  | 1,09 | 1,45E-03 | <i>GAS1</i>      | Beta-1,3-glucanase, required for cell wall assembly and also has a role in transcriptional silencing; localizes to the cell surface via a glycosylphosphatidylinositol (GPI) anchor; also found at the nuclear periphery                                                                                             |
| CAGL004004g   |                | 1,09 | 7,63E-02 | <i>YOR228C</i>   | Protein of unknown function, localized to the mitochondrial outer membrane                                                                                                                                                                                                                                           |
| CAGL004719g   |                | 1,09 | 2,28E-03 | <i>YWL208W</i>   | Protein of unknown function; may interact with ribosomes, based on co-purification experiments; authentic, non-tagged protein is detected in purified mitochondria in high-throughput studies; potential orthologs found in other fungi                                                                              |
| CAGL001705g   | <i>CgGPX2</i>  | 1,08 | 6,24E-03 | <i>GPX2</i>      | Phospholipid hydroperoxide glutathione peroxidase induced by glucose starvation that protects cells from phospholipid hydroperoxides and nonphospholipid peroxides during oxidative stress                                                                                                                           |
| CAGL006842g   |                | 1,08 | 6,00E-03 | <i>BBC1</i>      | Protein possibly involved in assembly of actin patches; interacts with an actin assembly factor Las17p and with the SH3 domains of Type I myosins Myo3p and Myo5p; localized predominantly to cortical actin patches                                                                                                 |
| CAGL005544g   |                | 1,08 | 9,76E-03 | <i>HBT1</i>      | Substrate of the Huh1p ubiquitin-like protein that localizes to the shmoo tip (mating projection); mutants are defective for mating projection formation, thereby implicating Hbt1p in polarized cell morphogenesis                                                                                                  |
| CAGL006677g   |                | 1,08 | 7,02E-02 | <i>HHF2</i>      | Histone H4, core histone protein required for chromatin assembly and chromosome function; one of two identical histone proteins (see also HHF1); contributes to telomeric silencing; N-terminal domain involved in maintaining genomic integrity                                                                     |
| CAGL003058g   |                | 1,08 | 5,35E-03 | <i>ICL1</i>      | Isocitrate lyase, catalyzes the formation of succinate and glyoxylate from isocitrate, a key reaction of the glyoxylate cycle; expression of ICL1 is induced by growth on ethanol and repressed by growth on glucose                                                                                                 |

|              |                 |      |          |                |                                                                                                                                                                                                                                                                                                                                         |
|--------------|-----------------|------|----------|----------------|-----------------------------------------------------------------------------------------------------------------------------------------------------------------------------------------------------------------------------------------------------------------------------------------------------------------------------------------|
| CAGL0B02145g |                 | 1,07 | 2,95E-03 | <i>TOS2</i>    | Protein involved in localization of Cdc24p to the site of bud growth; may act as a membrane anchor; localizes to the bud neck and bud tip; potentially phosphorylated by Cdc28p                                                                                                                                                         |
| CAGL0G08712g |                 | 1,07 | 1,19E-03 | <i>KGD1</i>    | Component of the mitochondrial alpha-ketoglutarate dehydrogenase complex, which catalyzes a key step in the tricarboxylic acid (TCA) cycle, the oxidative decarboxylation of alpha-ketoglutarate to form succinyl-CoA                                                                                                                   |
| CAGL0L02321g |                 | 1,07 | 2,25E-03 | <i>MET14</i>   | Adenylylsulfate kinase, required for sulfate assimilation and involved in methionine metabolism                                                                                                                                                                                                                                         |
| CAGLK07634g  | <i>CgGAT1</i>   | 1,07 | 4,61E-03 | <i>GAT1</i>    | Transcriptional activator of genes involved in nitrogen catabolite repression; contains a GATA-1-type zinc finger DNA-binding motif; activity and localization regulated by nitrogen limitation and Ure2p                                                                                                                               |
| CAGL0C03113g |                 | 1,07 | 3,06E-03 | <i>DCS1</i>    | Non-essential hydrolase involved in mRNA decapping; activates Xrn1p; may function in a feedback mechanism to regulate deadenylation, contains pyrophosphatase activity and a HIT (histidine triad) motif; interacts with neutral trehalase Nth1p; required for growth on glycerol medium                                                |
| CAGLE0E4774g |                 | 1,05 | 4,11E-03 | <i>YDR222W</i> | Protein of unknown function; green fluorescent protein (GFP)-fusion protein localizes to the cytoplasm in a punctate pattern                                                                                                                                                                                                            |
| CAGL0F07821g |                 | 1,05 | 2,55E-03 | <i>HUL5</i>    | Multubiquitin chain assembly factor (E4); proteasome processivity factor that elongates polyUb chains on substrates, opposing Ubp6p, a branched polyubiquitin protease; required for retrograde transport of misfolded proteins during ERAD                                                                                             |
| CAGL0L09933g |                 | 1,05 | 4,11E-03 | <i>CUE5</i>    | Protein containing a CUE domain that binds ubiquitin, which may facilitate intramolecular monoubiquitination; green fluorescent protein (GFP)-fusion protein localizes to the cytoplasm in a punctate pattern                                                                                                                           |
| CAGL0B02860g |                 | 1,05 | 3,01E-03 | <i>ATG33</i>   | Mitochondrial mitophagy-specific protein; required primarily for mitophagy induced at the post-log phase; not required for other types of selective autophagy or macroautophagy; conserved within fungi, but not in higher eukaryotes                                                                                                   |
| CAGL0C02673g |                 | 1,04 | 3,83E-03 | <i>ART10</i>   | Protein of unknown function that contains 2 PY motifs and is ubiquitinated by Rsp5p; overexpression confers resistance to arsenite; green fluorescent protein (GFP)-fusion protein localizes it to the cytoplasm; non-essential gene                                                                                                    |
| CAGLK04037g  | <i>CgFKS2</i>   | 1,04 | 1,24E-03 | <i>GSC2</i>    | Catalytic subunit of 1,3-beta-glucan synthase, involved in formation of the inner layer of the spore wall; activity positively regulated by Rho1p and negatively by Smk1p; has similarity to an alternate catalytic subunit, Fks1p ( <i>Gsc1p</i> )                                                                                     |
| CAGL0F03267g |                 | 1,03 | 9,42E-03 | <i>YHR080C</i> | Protein of unknown function that may interact with ribosomes, based on co-purification experiments; the authentic, non-tagged protein is detected in highly purified mitochondria in high-throughput studies                                                                                                                            |
| CAGL0G10219g | <i>CgAWP12</i>  | 1,02 | 2,28E-03 | -              | Adhesin-like protein with 5 tandem repeats                                                                                                                                                                                                                                                                                              |
| CAGL0H10032g | <i>CgPST2</i>   | 1,02 | 8,59E-03 | <i>RFS1</i>    | Protein of unknown function; member of a flavodoxin-like fold protein family that includes Pst2p and Ycp4p; green fluorescent protein (GFP)-fusion protein localizes to the cytoplasm in a punctate pattern                                                                                                                             |
| CAGL0L06270g | <i>CgBHM1_B</i> | 1,01 | 2,75E-03 | <i>BMH2</i>    | 14-3-3 protein, minor isoform; controls proteome at post-transcriptional level, binds proteins and DNA, involved in regulation of many processes including exocytosis, vesicle transport, Ras/MAPK signaling, and rapamycin-sensitive signaling                                                                                         |
| CAGL0I01342g |                 | 1,00 | 2,57E-03 | <i>GLY1</i>    | Threonine aldolase, catalyzes the cleavage of L-allo-threonine and L-threonine to glycine; involved in glycine biosynthesis                                                                                                                                                                                                             |
| CAGL0K04213g |                 | 1,00 | 6,28E-03 | <i>YGR042W</i> | Putative protein of unknown function; involved in maintenance of proper telomere length; green fluorescent protein (GFP)-fusion protein localizes to both the cytoplasm and the nucleus                                                                                                                                                 |
| CAGL0I00539g | <i>CgSLT2</i>   | 1,00 | 1,97E-01 | <i>SLT2</i>    | Serine/threonine MAP kinase; involved in regulating maintenance of cell wall integrity, progression through the cell cycle, and nuclear mRNA retention in heat shock; required for mitophagy and pexophagy; affects recruitment of mitochondria to the phagophore assembly site (PAS); regulated by the PKC1-mediated signaling pathway |

#### DOWN-REGULATED GENES

| ORF          | Gene Name | log <sub>2</sub> FC ( <i>ΔCgphaa1 AC/ΔCgphaa1 CTRL</i> ) | p_value  | <i>S. cerevisiae</i> orthologue | Function                                                                                                                                                                                                                                                  |
|--------------|-----------|----------------------------------------------------------|----------|---------------------------------|-----------------------------------------------------------------------------------------------------------------------------------------------------------------------------------------------------------------------------------------------------------|
| CAGL0H02409g |           | -1,00                                                    | 3,10E-03 | <i>TIF11</i>                    | Translation initiation factor eIF1A, essential protein that forms a complex with Sui1p (eIF1) and the 40S ribosomal subunit and scans for the start codon; C-terminus associates with Fun12p (eIF5B); N terminus interacts with eIF2 and eIF3             |
| CAGL0H04521g |           | -1,01                                                    | 9,04E-04 | <i>RPL32</i>                    | Protein component of the large (60S) ribosomal subunit, has similarity to rat L32 ribosomal protein; overexpression disrupts telomeric silencing                                                                                                          |
| CAGL0G00154g |           | -1,01                                                    | 1,93E-03 | <i>ZUO1</i>                     | Ribosome-associated chaperone, functions in ribosome biogenesis and, in partnership with Ssz1p and Ssb1/2, as a chaperone for nascent polypeptide chains; contains a DnaJ domain and functions as a J-protein partner for Ssb1p and Ssb2p                 |
| CAGLE0E5764g |           | -1,01                                                    | 4,07E-03 | <i>PUS1</i>                     | tRNA:pseudouridine synthase, introduces pseudouridines at positions 26-28, 34-36, 65, and 67 of tRNA; nuclear protein that appears to be involved in tRNA export; also acts on U2 snRNA                                                                   |
| CAGL0H00462g |           | -1,01                                                    | 9,88E-03 | <i>RP55</i>                     | Protein component of the small (40S) ribosomal subunit, the least basic of the non-acidic ribosomal proteins; phosphorylated in vivo; essential for viability; has similarity to E. coli S7 and rat S5 ribosomal proteins                                 |
| CAGL0F04983g |           | -1,01                                                    | 4,52E-03 | <i>DBP9</i>                     | DEAD-box protein required for 27S rRNA processing; exhibits DNA, RNA and DNA/RNA helicase activities; ATPase activity shows preference for DNA over RNA; DNA helicase activity abolished by mutation in RNA-binding domain                                |
| CAGL0I00957g |           | -1,01                                                    | 6,51E-03 | <i>RLP24</i>                    | Essential protein with similarity to Rpl24Ap and Rpl24Bp, associated with pre-60S ribosomal subunits and required for ribosomal large subunit biogenesis                                                                                                  |
| CAGL0L05566g |           | -1,02                                                    | 2,66E-03 | <i>GCD14</i>                    | Subunit of tRNA (1-methyladenosine) methyltransferase, with Gcd10p, required for the modification of the adenine at position 58 in tRNAs, especially tRNA <sup>Met</sup> ; first identified as a negative regulator of GCN4 expression                    |
| CAGL0A02090g |           | -1,02                                                    | 9,66E-03 | <i>YHR020W</i>                  | Protein of unknown function that may interact with ribosomes, based on co-purification experiments; has similarity to proline-tRNA ligase; YHR020W is an essential gene                                                                                   |
| CAGL0K03795g |           | -1,02                                                    | 8,02E-03 | <i>ECM16</i>                    | Essential DEAH-box ATP-dependent RNA helicase specific to the U3 snRNP, predominantly nucleolar in distribution, required for 18S rRNA synthesis                                                                                                          |
| CAGL0L11638g |           | -1,02                                                    | 1,96E-03 | <i>ESF1</i>                     | Nucleolar protein involved in pre-rRNA processing; depletion causes severely decreased 18S rRNA levels                                                                                                                                                    |
| CAGL0H00957g |           | -1,03                                                    | 2,78E-03 | <i>SUI3</i>                     | Beta subunit of the translation initiation factor eIF2, involved in the identification of the start codon; proposed to be involved in mRNA binding                                                                                                        |
| CAGL0F01749g |           | -1,03                                                    | 1,12E-03 | <i>SHM2</i>                     | Cytosolic serine hydroxymethyltransferase, converts serine to glycine plus 5,10 methylenetetrahydrofolate; major isoform involved in generating precursors for purine, pyrimidine, amino acid, and lipid biosynthesis                                     |
| CAGL0K12804g |           | -1,03                                                    | 3,35E-03 | <i>BUD20</i>                    | Protein involved in bud-site selection; diploid mutants display a random budding pattern instead of the wild-type bipolar pattern                                                                                                                         |
| CAGL0D02706g |           | -1,04                                                    | 2,69E-03 | <i>RIX1</i>                     | Essential component of the Rix1 complex (Rix1p, Ipi1p, Ipi3p) that is required for processing of ITS2 sequences from 35S pre-rRNA; Rix1 complex associates with Mdn1p in pre-60S ribosomal particles                                                      |
| CAGLE0E5500g |           | -1,04                                                    | 1,32E-02 | <i>RPA190</i>                   | RNA polymerase I largest subunit A190                                                                                                                                                                                                                     |
| CAGL0I02398g |           | -1,04                                                    | 7,70E-03 | <i>NMD3</i>                     | Protein involved in nuclear export of the large ribosomal subunit; acts as a Crm1p-dependent adapter protein for export of nascent ribosomal subunits through the nuclear pore complex                                                                    |
| CAGL0L12364g |           | -1,04                                                    | 1,74E-03 | <i>ERG10</i>                    | Acetyl-CoA C-acetyltransferase (acetoacetyl-CoA thiolase), cytosolic enzyme that transfers an acetyl group from one acetyl-CoA molecule to another, forming acetoacetyl-CoA; involved in the first step in mevalonate biosynthesis                        |
| CAGL0B01881g |           | -1,05                                                    | 9,59E-03 | <i>TRM1</i>                     | tRNA methyltransferase; two forms of the protein are made by alternative translation starts; localizes to both the nucleus and mitochondrion to produce the modified base N <sub>2</sub> ,N <sub>2</sub> -dimethylguanosine in tRNAs in both compartments |

|              |         |       |          |        |                                                                                                                                                                                                                                                                                                                                                                                                                                        |
|--------------|---------|-------|----------|--------|----------------------------------------------------------------------------------------------------------------------------------------------------------------------------------------------------------------------------------------------------------------------------------------------------------------------------------------------------------------------------------------------------------------------------------------|
| CAGL0M01430g |         | -1.05 | 4,85E-03 | UTP4   | Subunit of U3-containing 90S preribosome and Small Subunit (SSU) processome complexes involved in production of 18S rRNA and assembly of small ribosomal subunit; member of t-Utp subcomplex involved with transcription of 35S rRNA transcript                                                                                                                                                                                        |
| CAGL0B00792g |         | -1.05 | 2,18E-03 | SR09   | Cytoplasmic RNA-binding protein that associates with translating ribosomes; involved in heme regulation of Hap1p as a component of the HMC complex, also involved in the organization of actin filaments; contains a La motif                                                                                                                                                                                                          |
| CAGL0K06567g |         | -1.05 | 3,00E-03 | RPL27B | Protein component of the large (60S) ribosomal subunit, nearly identical to Rpl27Ap and has similarity to rat L27 ribosomal protein                                                                                                                                                                                                                                                                                                    |
| CAGL0B04125g |         | -1.05 | 5,51E-03 | RPC40  | RNA polymerase subunit AC40, common to RNA polymerase I and III                                                                                                                                                                                                                                                                                                                                                                        |
| CAGL0E03938g |         | -1.06 | 2,49E-03 | RPL8A  | Ribosomal protein L4 of the large (60S) ribosomal subunit, nearly identical to Rpl8Bp and has similarity to rat L7a ribosomal protein; mutation results in decreased amounts of free 60S subunits                                                                                                                                                                                                                                      |
| CAGL0F02937g |         | -1.06 | 6,80E-03 | RPL12B | Protein component of the large (60S) ribosomal subunit, nearly identical to Rpl12Ap; rpl12a rpl12b double mutant exhibits slow growth and slow translation; has similarity to E. coli L11 and rat L12 ribosomal proteins                                                                                                                                                                                                               |
| CAGL0B01232g | CgEMG1  | -1.06 | 9,92E-03 | EMG1   | Member of the alpha/beta knot fold methyltransferase superfamily; required for maturation of 18S rRNA and for 40S ribosome production; interacts with RNA and with S-adenosylmethionine; associates with spindle/microtubules; forms homodimers; human ortholog is mutated in Bowen-Conradi syndrome                                                                                                                                   |
| CAGL0M04829g |         | -1.06 | 8,57E-03 | RRP5   | RNA binding protein with preference for single stranded tracts of U's involved in synthesis of both 18S and 5.8S rRNAs; component of both the ribosomal small subunit (SSU) processome and the 90S preribosome                                                                                                                                                                                                                         |
| CAGL0H03773g |         | -1.07 | 8,22E-03 | RLP7   | Nucleolar protein with similarity to large ribosomal subunit L7 proteins; constituent of 66S pre-ribosomal particles; plays an essential role in processing of precursors to the large ribosomal subunit RNAs                                                                                                                                                                                                                          |
| CAGL0A00979g |         | -1.07 | 5,96E-04 | RPL38  | Protein component of the large (60S) ribosomal subunit, has similarity to rat L38 ribosomal protein                                                                                                                                                                                                                                                                                                                                    |
| CAGL0I03080g | CgURA3  | -1.09 | 3,73E-03 | URA3   | Orotidine-5'-phosphate (OMP) decarboxylase, catalyzes the sixth enzymatic step in the de novo biosynthesis of pyrimidines, converting OMP into uridine monophosphate (UMP); converts 5-FOA into 5-fluorouracil, a toxic compound                                                                                                                                                                                                       |
| CAGL0I08327g |         | -1.09 | 2,52E-03 | GCD11  | Gamma subunit of the translation initiation factor eIF2, involved in the identification of the start codon; binds GTP when forming the ternary complex with GTP and tRNAi-Met                                                                                                                                                                                                                                                          |
| CAGL0K04499g |         | -1.09 | 6,22E-03 | ADE6   | Formylglycinamide-ribonucleotide (FGAM)-synthetase, catalyzes a step in the 'de novo' purine nucleotide biosynthetic pathway                                                                                                                                                                                                                                                                                                           |
| CAGL0L04950g |         | -1.09 | 4,83E-03 | ERB1   | Constituent of 66S pre-ribosomal particles, forms a complex with Nop7p and Ytm1p that is required for maturation of the large ribosomal subunit; required for maturation of the 25S and 5.8S ribosomal RNAs; homologous to mammalian Bop1                                                                                                                                                                                              |
| CAGL0K02541g |         | -1.10 | 2,21E-03 | PRS3   | 5-phospho-ribosyl-1(alpha)-pyrophosphate synthetase, synthesizes PRPP, which is required for nucleotide, histidine, and tryptophan biosynthesis; one of five related enzymes, which are active as heteromultimeric complexes                                                                                                                                                                                                           |
| CAGL0F02541g |         | -1.10 | 4,61E-02 | UTP5   | Subunit of U3-containing Small Subunit (SSU) processome complex involved in production of 18S rRNA and assembly of small ribosomal subunit                                                                                                                                                                                                                                                                                             |
| CAGL0F01045g |         | -1.10 | 3,81E-03 | RPS15  | Protein component of the small (40S) ribosomal subunit; has similarity to E. coli S19 and rat S15 ribosomal proteins                                                                                                                                                                                                                                                                                                                   |
| CAGL0D03718g | CgTIF5  | -1.10 | 1,86E-03 | TIF5   | Translation initiation factor eIF5; functions both as a GTPase-activating protein to mediate hydrolysis of ribosome-bound GTP and as a GDP dissociation inhibitor to prevent recycling of eIF2                                                                                                                                                                                                                                         |
| CAGL0K01991g |         | -1.11 | 3,93E-03 | NCL1   | S-adenosyl-L-methionine-dependent TRNA: m5C-methyltransferase, methylates cytosine to m5C at several positions in tRNAs and intron-containing pre-tRNAs; increases proportion of tRNA <sup>Leu</sup> (CAA) with m5C at wobble position in response to hydrogen peroxide, causing selective translation of mRNA from genes enriched in TTG codon; loss of NCL1 confers hypersensitivity to oxidative stress; similar to Nop2p and human |
| CAGL0I11286g |         | -1.11 | 4,68E-03 | IPB3   | Essential component of the Rix1 complex (Rix1p, Ipi1p, Ipi3p) that is required for processing of ITS2 sequences from 35S pre-rRNA; highly conserved and contains WD40 motifs; Rix1 complex associates with Mdn1p in pre-60S ribosomal particles                                                                                                                                                                                        |
| CAGL0L00341g |         | -1.11 | 2,84E-03 | EBP2   | Required for 25S rRNA maturation and 60S ribosomal subunit assembly; localizes to the nucleolus and in foci along nuclear periphery; constituent of 66S pre-ribosomal particles; cooperates with Rrs1p and Mps3p to mediate telomere clustering by binding Sir4p, but is not involved in telomere tethering                                                                                                                            |
| CAGL0E04994g |         | -1.12 | 6,77E-04 | RPL9A  | Protein component of the large (60S) ribosomal subunit, nearly identical to Rpl9Bp and has similarity to E. coli L6 and rat L9 ribosomal proteins                                                                                                                                                                                                                                                                                      |
| CAGL0L03806g |         | -1.12 | 2,80E-03 | NOP15  | Constituent of 66S pre-ribosomal particles, involved in 60S ribosomal subunit biogenesis; localizes to both nucleolus and cytoplasm                                                                                                                                                                                                                                                                                                    |
| CAGL0L01551g |         | -1.13 | 9,99E-04 | SUR7   | Plasma membrane protein that localizes to furrow-like invaginations (MCC patches); component of eisosomes; associated with endocytosis, along with Pil1p and Lsp1p; sporulation and plasma membrane sphingolipid content are altered in mutants                                                                                                                                                                                        |
| CAGL0M13893g |         | -1.14 | 1,85E-01 | NIP1   | eIF3c subunit of the eukaryotic translation initiation factor 3 (eIF3), involved in the assembly of preinitiation complex and start codon selection                                                                                                                                                                                                                                                                                    |
| CAGL0G01991g |         | -1.14 | 1,67E-03 | NOB1   | Essential nuclear protein involved in proteasome maturation and synthesis of 40S ribosomal subunits; required for cleavage of the 20S pre-rRNA to generate the mature 18S rRNA                                                                                                                                                                                                                                                         |
| CAGL0I03124g |         | -1.14 | 1,19E-03 | ARG5,6 | Acetylglutamate kinase and N-acetyl-gamma-glutamyl-phosphate reductase; N-acetyl-L-glutamate kinase (NAGK) catalyzes the 2nd and N-acetyl-gamma-glutamyl-phosphate reductase (NAGSA), the 3rd step in arginine biosynthesis; synthesized as a precursor which is processed in the mitochondrion to yield mature NAGK and NAGSA; enzymes form a metabolon complex with Arg2p; NAGK C-terminal domain stabilizes the                     |
| CAGL0K01551g |         | -1.15 | 2,53E-03 | DBP10  | Putative ATP-dependent RNA helicase of the DEAD-box protein family, constituent of 66S pre-ribosomal particles; essential protein involved in ribosome biogenesis                                                                                                                                                                                                                                                                      |
| CAGL0F02563g | CgHPT1  | -1.15 | 4,90E-03 | HPT1   | Dimeric hypoxanthine-guanine phosphoribosyltransferase, catalyzes the transfer of the phosphoribosyl portion of 5-phosphoribosyl-alpha-1-pyrophosphate to a purine base (either guanine or hypoxanthine) to form pyrophosphate and a purine nucleotide (either guanosine monophosphate or inosine monophosphate); mutations in the human homolog HPRT1 can cause Lesch-Nyhan syndrome and Kelley-Seegmiller syndrome                   |
| CAGL0B02794g |         | -1.15 | 1,77E-03 | ADE13  | Adenylosuccinate lyase, catalyzes two steps in the 'de novo' purine nucleotide biosynthetic pathway; expression is repressed by adenine and activated by Bas1p and Pho2p; mutations in human ortholog ADSL cause adenylosuccinate deficiency                                                                                                                                                                                           |
| CAGL0I08393g | CgTIF3  | -1.15 | 1,69E-03 | TIF3   | Translation initiation factor eIF-4B, has RNA annealing activity; contains an RNA recognition motif and binds to single-stranded RNA                                                                                                                                                                                                                                                                                                   |
| CAGL0I10032g |         | -1.15 | 3,46E-03 | NOP2   | Probable RNA m(S)C methyltransferase, essential for processing and maturation of 27S pre-rRNA and large ribosomal subunit biogenesis; localized to the nucleolus; constituent of 66S pre-ribosomal particles                                                                                                                                                                                                                           |
| CAGL0D00880g |         | -1.15 | 8,03E-03 | TSR1   | Protein required for processing of 20S pre-rRNA in the cytoplasm; associates with pre-40S ribosomal particles; inhibits the premature association of 60S subunits with assembling 40S subunits in the cytoplasm; similar to Bms1p                                                                                                                                                                                                      |
| CAGL0D00550g |         | -1.16 | 1,98E-03 | PRS1   | 5-phospho-ribosyl-1(alpha)-pyrophosphate synthetase, synthesizes PRPP, which is required for nucleotide, histidine, and tryptophan biosynthesis; one of five related enzymes, which are active as heteromultimeric complexes                                                                                                                                                                                                           |
| CAGL0G02409g |         | -1.16 | 2,69E-03 | SRP40  | Nucleolar, serine-rich protein with a role in preribosome assembly or transport; may function as a chaperone of small nucleolar ribonucleoprotein particles (snoRNPs); immunologically and structurally to rat Nopp140                                                                                                                                                                                                                 |
| CAGL0L06952g | CgTIF34 | -1.16 | 2,99E-03 | TIF34  | eIF3i subunit of the core complex of translation initiation factor 3 (eIF3), which is essential for translation; stimulates rate of ribosomal scanning during translation reinitiation                                                                                                                                                                                                                                                 |
| CAGL0E02673g |         | -1.16 | 2,10E-03 | UTP23  | Component of the small subunit processome, involved in 40S ribosomal subunit biogenesis; interacts with snR30 and is required for dissociation of snR30 from large pre-ribosomal particles; has homology to PINC domain protein Fcflp, although the PINC domain of Utp23p is not required for function; essential protein                                                                                                              |
| CAGL0I06374g |         | -1.16 | 7,11E-04 | RPP1B  | Ribosomal protein P1 beta, component of the ribosomal stalk, which is involved in interaction of translational elongation factors with ribosome; accumulation is regulated by phosphorylation and interaction with the P2 stalk component                                                                                                                                                                                              |
| CAGL0B01507g | CgARG8  | -1.16 | 5,17E-03 | ARG8   | Acetylornithine aminotransferase, catalyzes the fourth step in the biosynthesis of the arginine precursor ornithine                                                                                                                                                                                                                                                                                                                    |
| CAGL0B00286g |         | -1.16 | 6,43E-03 | CHA1   | Catabolic L-serine (L-threonine) deaminase, catalyzes the degradation of both L-serine and L-threonine; required to use serine or threonine as the sole nitrogen source, transcriptionally induced by serine and threonine                                                                                                                                                                                                             |
| CAGL0K09966g | CgPRT1  | -1.17 | 7,06E-04 | PRT1   | eIF3b subunit of the core complex of translation initiation factor 3 (eIF3), essential for translation; part of a subcomplex (Prt1p-Rpg1p-Nip1p) that stimulates binding of mRNA and tRNAi(Met) to ribosomes                                                                                                                                                                                                                           |



|              |         |       |          |           |                                                                                                                                                                                                                                                                                                                 |
|--------------|---------|-------|----------|-----------|-----------------------------------------------------------------------------------------------------------------------------------------------------------------------------------------------------------------------------------------------------------------------------------------------------------------|
| CAGL0J07238g | CgRPS12 | -1.18 | 5,29E-03 | RPS12     | Protein component of the small (40S) ribosomal subunit; has similarity to rat ribosomal protein S12                                                                                                                                                                                                             |
| CAGL0K02233g |         | -1.18 | 7,63E-03 | NSA2      | Protein constituent of 66S pre-ribosomal particles, contributes to processing of the 27S pre-rRNA                                                                                                                                                                                                               |
| CAGL0E02013g |         | -1.19 | 5,68E-04 | RPL18A    | Protein component of the large (60S) ribosomal subunit, identical to Rpl18Bp and has similarity to rat L18 ribosomal protein; intron of RPL18A pre-mRNA forms stem-loop structures that are a target for Rnt1p cleavage leading to degradation                                                                  |
| CAGL0M11616g |         | -1.21 | 1,12E-03 | MDN1      | Huge dynein-related AAA-type ATPase (midasin), forms extended pre-60S particle with the Rix1 complex (Rix1p-Ipi1p-Ipi3p); acts in removal of ribosomal biogenesis factors at successive steps of pre-60S assembly and export from nucleus                                                                       |
| CAGL0H02937g |         | -1.21 | 1,21E-03 | UTP18     | Possible U3 snoRNP protein involved in maturation of pre-18S rRNA, based on computational analysis of large-scale protein-protein interaction data                                                                                                                                                              |
| CAGL0I03476g |         | -1.21 | 7,73E-03 | RSA4      | WD-repeat protein involved in ribosome biogenesis; may interact with ribosomes; required for maturation and efficient intra-nuclear transport or pre-60S ribosomal subunits, localizes to the nucleolus                                                                                                         |
| CAGL0K09042g |         | -1.21 | 1,59E-03 | TMA16     | Protein of unknown function that associates with ribosomes                                                                                                                                                                                                                                                      |
| CAGL0M12881g |         | -1.21 | 8,18E-04 | NA        | NA                                                                                                                                                                                                                                                                                                              |
| CAGL0H09724g |         | -1.22 | 1,12E-03 | NUG1      | GTPase that associates with nuclear 60S pre-ribosomes, required for export of 60S ribosomal subunits from the nucleus                                                                                                                                                                                           |
| CAGL0M03487g |         | -1.22 | 7,57E-03 | RPC34     | RNA polymerase III subunit C34; interacts with TFIIB70 and is a key determinant in pol III recruitment by the preinitiation complex                                                                                                                                                                             |
| CAGL0M05775g |         | -1.23 | 6,47E-03 | NIP7      | Nucleolar protein required for 60S ribosome subunit biogenesis, constituent of 66S pre-ribosomal particles; physically interacts with Nop8p and the exosome subunit Rrp43p                                                                                                                                      |
| CAGL0E06314g |         | -1.23 | 2,08E-03 | ARX1      | Shuttling pre-60S factor; involved in the biogenesis of ribosomal large subunit biogenesis; interacts directly with Alb1; responsible for Tif6 recycling defects in absence of Rei1; associated with the ribosomal export complex                                                                               |
| CAGL0G07843g |         | -1.24 | 1,17E-02 | NOP7      | Component of several different pre-ribosomal particles; forms a complex with Tsr1p and Cps3p that is required for maturation of the large ribosomal subunit; required for exit from G2 and for the initiation of cytokinesis                                                                                    |
| CAGL0D01562g | CgFCY1  | -1.26 | 5,96E-03 | FCY1      | Cytosine deaminase, zinc metalloenzyme that catalyzes the hypoxanthine deamination of cytosine to uracil; of molecular interest because it also catalyzes the deamination of 2-thiouracil to form thiazosine                                                                                                    |
| CAGL0E03289g |         | -1.26 | 1,33E-03 | TIF4631   | Translation initiation factor eIF4G, subunit of the mammalian eukaryotic protein complex (eIF4F) that also contains eIF4E (eIF4Gpp), interacts with Rps27p and with eIF4A (TIF4631); also has a role in biogenesis of the large ribosomal subunit                                                               |
| CAGL0M13519g |         | -1.26 | 1,28E-03 | HAS1      | ATP-dependent RNA helicase; localizes to both the nuclear periphery and nucleolus; highly enriched in nuclear pore complex fractions; constituent of 66S pre-ribosomal particles                                                                                                                                |
| CAGL0J03846g |         | -1.26 | 9,42E-03 | DBP2      | Essential ATP-dependent RNA helicase of the DEAD-box protein family, involved in nonsense-mediated mRNA decay and rRNA processing                                                                                                                                                                               |
| CAGL0K11880g |         | -1.27 | 4,49E-04 | MRH1      | Protein that localizes primarily to the plasma membrane, also found at the nuclear envelope; the authentic, non-tagged protein is detected in mitochondria in a phosphorylated state; has similarity to Hsp30p and Yro2p                                                                                        |
| CAGL0K10362g |         | -1.27 | 7,29E-02 | ORT1      | Ornithine transporter of the mitochondrial inner membrane; exports ornithine from mitochondria as part of arginine biosynthesis; human ortholog associated with hyperammonemia-hyperornithinemia-homociduria syndrome                                                                                           |
| CAGL0I08987g |         | -1.27 | 2,72E-03 | ARG4      | Argininosuccinate lyase, catalyzes the final step in the arginine biosynthesis pathway                                                                                                                                                                                                                          |
| CAGL0E06490g |         | -1.28 | 1,32E-03 | JIP5      | Essential protein required for biogenesis of the large ribosomal subunit; interacts with proteins involved in rRNA processing; ribosome biogenesis; ubiquitination and demethylation; similar to Yro2p; a human ortholog is involved in the regulation of cell cycle                                            |
| CAGL0A04015g |         | -1.29 | 2,63E-04 | NOP56     | Essential evolutionarily-conserved nucleolar protein component of the box C/D snoRNP complexes that direct 2'-O-methylation of pre-rRNA during its maturation; overexpression causes spindle orientation defects                                                                                                |
| CAGL0C03369g |         | -1.30 | 7,37E-04 | NOG2      | Putative GTPase that associates with pre-60S ribosomal subunits in the nucleolus and is required for their nuclear export and maturation                                                                                                                                                                        |
| CAGL0I03234g |         | -1.30 | 1,78E-03 | SNU13     | RNA binding protein, part of U3 snoRNP involved in rRNA processing, part of U4/U6-U5 tri-snoRNP involved in mRNA splicing, similar to human 15.5K protein                                                                                                                                                       |
| CAGL0C03243g |         | -1.30 | 5,49E-04 | ARB1      | ATPase of the ATP-binding cassette (ABC) family involved in 40S and 60S ribosome biogenesis, has similarity to Gcn20p; shuttles from nucleus to cytoplasm, physically interacts with Tif6p, Lsg1p                                                                                                               |
| CAGL0E08756g |         | -1.30 | 1,97E-03 | RRP12     | Protein required for export of the ribosomal subunits; associates with the RNA components of the pre-ribosomes; has a role in nuclear import in association with Pse1p; contains HEAT-repeats                                                                                                                   |
| CAGL0H03685g |         | -1.30 | 4,97E-04 | CBF5      | Pseudouridine synthase catalytic subunit of box H/JACA small nucleolar ribonucleoprotein particles (snoRNPs); acts on both large and small rRNAs and on snRNA U2; mutations in human ortholog dyskerin cause the disorder dyskeratosis congenita                                                                |
| CAGL0E00869g |         | -1.31 | 3,38E-04 | STM1      | Protein required for optimal translation under nutrient stress; perturbs association of Yef3p with ribosomes; involved in TOR signaling; binds G4 quadruplex and purine motif triplex nucleic acid; helps maintain telomere structure                                                                           |
| CAGL0K06809g |         | -1.32 | 6,10E-03 | YBR220C   | Putative protein of unknown function; YBR220C is not an essential gene                                                                                                                                                                                                                                          |
| CAGL0E05874g |         | -1.32 | 6,14E-04 | BMS1      | GTPase required for synthesis of 40S ribosomal subunits and for processing the 35S pre-rRNA at sites A0, A1, and A2; interacts with Rcl1p, which stimulates its GTPase and U3 snoRNA binding activities; has similarity to Tsr1p                                                                                |
| CAGL0H04763g |         | -1.32 | 4,76E-03 | NPL3      | RNA-binding protein that promotes elongation, regulates termination, and carries poly(A) mRNA from nucleus to cytoplasm; has a role in repressing translation initiation by binding eIF4G; required for pre-mRNA splicing; dissociation from mRNAs promoted by Mtr10p; phosphorylated by Sky1p in the cytoplasm |
| CAGL0I10010g |         | -1.33 | 9,34E-03 | GCD10     | Subunit of tRNA (1-methyladenosine) methyltransferase with Gcd14p, required for the modification of the adenine at position 58 in tRNAs, especially tRNA-Met; first identified as a negative regulator of GCN4 expression                                                                                       |
| CAGL0F08129g | CgSDA1  | -1.33 | 2,77E-03 | SDA1      | Highly conserved nuclear protein required for actin cytoskeleton organization and passage through Start, plays a critical role in G1 events, binds Nap1p, also involved in 60S ribosome biogenesis                                                                                                              |
| CAGL0J09790g |         | -1.34 | 2,40E-03 | GGC1      | Mitochondrial GTP/GDP transporter, essential for mitochondrial genome maintenance; has a role in mitochondrial iron transport; member of the mitochondrial carrier family                                                                                                                                       |
| CAGL0K09614g |         | -1.34 | 2,05E-03 | KRE33     | Essential protein, required for biogenesis of the small ribosomal subunit; heterozygous mutant shows haploinsufficiency in K1 killer toxin resistance                                                                                                                                                           |
| CAGL0M11110g |         | -1.34 | 1,96E-03 | RRP1      | Essential evolutionarily conserved nucleolar protein necessary for biogenesis of 60S ribosomal subunits and processing of pre-rRNAs to mature rRNAs, associated with several distinct 66S pre-ribosomal particles                                                                                               |
| CAGL0J07898g |         | -1.35 | 2,28E-04 | GIS2      | Translational activator for mRNAs with internal ribosome entry sites; associates with polysomes and binds to a specific subset of mRNAs; ortholog of human ZNF9/CNBP, a gene involved in myotonic dystrophy type 2                                                                                              |
| CAGL0I07975g |         | -1.35 | 6,94E-04 | BRX1      | Nucleolar protein, constituent of 66S pre-ribosomal particles; depletion leads to defects in rRNA processing and a block in the assembly of large ribosomal subunits; possesses a sigma(70)-like RNA-binding motif                                                                                              |
| CAGL0H05709g |         | -1.36 | 2,02E-03 | NOG1      | Putative GTPase that associates with free 60S ribosomal subunits in the nucleolus and is required for 60S ribosomal subunit biogenesis; constituent of 66S pre-ribosomal particles; member of the ODN family of nucleolar G-proteins                                                                            |
| CAGL0L11484g |         | -1.36 | 4,55E-04 | FPR3      | Nucleolar peptidyl-prolyl cis-trans isomerase (PPIase); FK506 binding protein; phosphorylated by casein kinase II [Cka1p-Cka2p-Ckb1p-Ckb2p] and dephosphorylated by Ptp1p                                                                                                                                       |
| CAGL0L05500g |         | -1.37 | 2,49E-03 | ALB1      | Shuttling pre-60S factor; involved in the biogenesis of ribosomal large subunit; interacts directly with Arx1p; responsible for Tif6p recycling defects in absence of Rei1p                                                                                                                                     |
| CAGL0E00517g |         | -1.40 | 8,64E-04 | YCR087C-A | Putative protein of unknown function; green fluorescent protein (GFP)-fusion protein localizes to the nucleolus; YCR087C-A is not an essential gene                                                                                                                                                             |
| CAGL0I01265g |         | -1.41 | 4,10E-03 | UTP15     | Nucleolar protein, component of the small subunit (SSU) processome containing the U3 snoRNA that is involved in processing of pre-18S rRNA                                                                                                                                                                      |
| CAGL0L10516g |         | -1.42 | 7,18E-04 | RPF2      | Essential protein involved in the processing of pre-rRNA and the assembly of the 60S ribosomal subunit; interacts with ribosomal protein L11; localizes predominantly to the nucleolus; constituent of 66S pre-ribosomal particles                                                                              |
| CAGL0C05115g | CgARG1  | -1.44 | 5,31E-04 | ARG1      | Argininosuccinate synthetase, catalyzes the formation of L-argininosuccinate from citrulline and L-aspartate in the arginine biosynthesis pathway; potential Cdc28p substrate                                                                                                                                   |
| CAGL0L08114g |         | -1.46 | 1,49E-03 | RPS22A    | Protein component of the small (40S) ribosomal subunit; nearly identical to Rps22Bp and has similarity to E. coli S8 and rat S15a ribosomal proteins                                                                                                                                                            |
| CAGL0G03443g |         | -1.46 | 1,98E-04 | KAP123    | Major protein in the nucleolus; involved in ribosome biogenesis; required for assembly of the 60S ribosomal subunit; involved in the formation of the nucleolar pre-60S particle; exports genetic material from the nucleus                                                                                     |
| CAGL0C03355g |         | -1.49 | 6,71E-03 | ESF2      | Essential nucleolar protein involved in pre-18S rRNA processing; binds to RNA and stimulates ATPase activity of Dbp3p; involved in assembly of the small subunit (SSU) processome                                                                                                                               |
| CAGL0G07106g | CgAPT1  | -1.51 | 2,44E-03 | APT1      | Adenine phosphoribosyltransferase, catalyzes the formation of AMP from adenine and 5-phosphoribosylpyrophosphate; involved in the salvage pathway of purine nucleotide biosynthesis                                                                                                                             |
| CAGL0A04037g |         | -1.54 | 1,37E-03 | PWP1      | Protein with WD-40 repeats involved in rRNA processing; associates with trans-acting ribosome biogenesis factors; similar to beta-transducin superfamily                                                                                                                                                        |
| CAGL0J00473g |         | -1.56 | 3,97E-04 | CIC1      | Essential protein that interacts with proteasome components and has a potential role in proteasome substrate specificity; also copurifies with 66S pre-ribosomal particles                                                                                                                                      |

|              |        |       |          |                |                                                                                                                                                                                                                                                                               |
|--------------|--------|-------|----------|----------------|-------------------------------------------------------------------------------------------------------------------------------------------------------------------------------------------------------------------------------------------------------------------------------|
| CAGL0K01859g |        | -1.60 | 4.74E-04 | <i>NOPI</i>    | Nucleolar protein, component of the small subunit processome complex, which is required for processing of pre-18S rRNA; has similarity to mammalian fibrillarin                                                                                                               |
| CAGL0B01122g | CgSAM1 | -1.60 | 2.43E-04 | <i>SAM1</i>    | S-adenosylmethionine synthetase, catalyzes transfer of the adenosyl group of ATP to the sulfur atom of methionine; one of two differentially regulated isozymes (Sam1p and Sam2p)                                                                                             |
| CAGL0I09790g |        | -1.62 | 7.75E-05 | <i>NOP58</i>   | Protein involved in pre-rRNA processing, 18S rRNA synthesis, and snoRNA synthesis; component of the small subunit processome complex, which is required for processing of pre-18S rRNA                                                                                        |
| CAGL0M10197g |        | -1.63 | 1.43E-04 | <i>MRT4</i>    | Protein involved in mRNA turnover and ribosome assembly, localizes to the nucleolus                                                                                                                                                                                           |
| CAGL0F09927g |        | -1.66 | 1.09E-02 | <i>GIJ1</i>    | Uvr1 synthase, highly conserved enzyme that catalyzes the second step in the biosynthesis of Uvr1 from inosine 3'-phosphate (Uvr1); transcription is not subject to regulation by guanine but is negatively regulated by essential protein that binds to the promoter element |
| CAGL0G07535g |        | -1.66 | 2.71E-04 | <i>RRS1</i>    | Essential protein that binds to the promoter element                                                                                                                                                                                                                          |
| CAGL0H02057g |        | -1.74 | 2.13E-03 | <i>GAR1</i>    | Protein component of the H/ACA snoRNP pseudouridylyase complex, involved in the modification and cleavage of the 18S pre-rRNA                                                                                                                                                 |
| CAGL0E03245g |        | -1.74 | 3.45E-04 | <i>NSR1</i>    | Nucleolar protein that binds nuclear localization sequences, required for pre-rRNA processing and ribosome biogenesis                                                                                                                                                         |
| CAGL0H09064g | CgFUR1 | -1.76 | 2.03E-04 | <i>FUR1</i>    | Uracil phosphoribosyltransferase, synthesizes UMP from uracil; involved in the pyrimidine salvage pathway                                                                                                                                                                     |
| CAGL0I08547g |        | -1.80 | 8.75E-04 | <i>YER156C</i> | Putative protein of unknown function; interacts with Hsp82p and copurifies with Ipl1p; expression is copper responsive and downregulated in strains deleted for MAC1, a copper-responsive transcription factor; similarity to mammalian MYG1                                  |
| CAGL0H05137g |        | -1.86 | 1.90E-04 | <i>ALD6</i>    | Cytosolic aldehyde dehydrogenase, activated by Mg <sup>2+</sup> and utilizes NADP <sup>+</sup> as the preferred coenzyme; required for conversion of acetaldehyde to acetate; constitutively expressed; localizes to the mitochondrial outer surface upon oxidative stress    |
