# Supplementary material for: The CgHaa1-Regulon Mediates Response and Tolerance to Acetic Acid Stress in the Human Pathogen Candida glabrata
Source: PubMed Central journal article supplement (PMC5217100; doi:10.1534/g3.116.034660), 2016-11-04
Supplement: 1TableS3.pdf [file 1TableS3.pdf]

**Supplementary Table S3** – List of the genes found to be up-regulated by CgHaa1 in response to acetic acid (30 mM, at pH 4.0). The dataset of genes regulated by CgHaa1 under acetic acid stress was selected to include: i) genes that were up-regulated (by more than 2-fold) in response to acetic acid in the KUE100 strain, but not in the ΔCgHaa1 mutant; ii) genes whose acid-induced transcriptional activation in the ΔCgHaa1 background was at least two-fold lower than the one registered in cells of the parental strain. The biological function indicated was based on the information available at Candida Genome Database. Information on involvement in tolerance to acetic acid of corresponding *S. cerevisiae* orthologues and their eventual inclusion in the ScHaa1-dependent transcriptional regulatory network is also shown, based on the information available on the YEASTRACT database (Teixeira et al., 2014).

### Genes whose acetic acid-induced transcriptional activation was fully dependent of CgHaa1

| ORF          | <i>C. glabrata</i> Gene | logFC (wt AC/<br>wt CTRL) | logFC<br>(ΔCgHaa1AC/<br>ΔCgHaa1<br>CTRL) | Function                                                                                                                                                                                                                        | <i>S. cerevisiae</i><br>orthologue | <i>S. cerevisiae</i><br>orthologue regulated<br>by ScHaa1? | <i>S. cerevisiae</i> homologue<br>confers resistance to<br>acetic acid? | <i>C. glabrata</i><br>promoter harbors<br>an HRE motif |
|--------------|-------------------------|---------------------------|------------------------------------------|---------------------------------------------------------------------------------------------------------------------------------------------------------------------------------------------------------------------------------|------------------------------------|------------------------------------------------------------|-------------------------------------------------------------------------|--------------------------------------------------------|
| CAGL0C04323g | -                       | 5,33                      | -                                        | Ortholog(s) have alpha,alpha-trehalase activity, role in trehalose catabolic process and cytoplasm localization                                                                                                                 | <i>NTH1</i>                        | Not described                                              | No                                                                      | No                                                     |
| CAGL0I07249g | -                       | 4,71                      | -                                        | Putative GTPase-activating protein involved in cell wall and cytoskeleton homeostasis; gene is upregulated in azole-resistant strain                                                                                            | <i>BAG7</i>                        | Not described                                              | No                                                                      | Yes                                                    |
| CAGL0K07337g | -                       | 4,37                      | -                                        | Has domain(s) with predicted ion channel activity, role in ion transport and membrane localization                                                                                                                              | <i>HSP30</i>                       | Yes                                                        | No                                                                      | Yes                                                    |
| CAGL0H02585g | -                       | 4,19                      | -                                        | Ortholog(s) have glutamate decarboxylase activity, role in cellular response to oxidative stress, glutamate catabolic process and cytoplasm localization                                                                        | <i>GAD1</i>                        | Yes                                                        | No                                                                      | Yes                                                    |
| CAGL0H10076g | -                       | 4,12                      | -                                        | Has domain(s) with predicted ion channel activity, role in ion transport and membrane localization                                                                                                                              | <i>YRO2</i>                        | Yes                                                        | Yes                                                                     | Yes                                                    |
| CAGL0G06182g | -                       | 3,72                      | -                                        | No Description Available                                                                                                                                                                                                        | <i>YHR131C</i>                     | Not described                                              | No                                                                      | No                                                     |
| CAGL0A01804g | <i>CgHXT1</i>           | 3,65                      | -                                        | Ortholog(s) have fructose transmembrane transporter activity, pentose transmembrane transporter activity, role in glucose transport, mannose transport and plasma membrane localization                                         | <i>HXT1</i>                        | Not described                                              | No                                                                      | No                                                     |
| CAGL0K03421g | -                       | 3,39                      | -                                        | Ortholog(s) have cytosol, nucleus localization                                                                                                                                                                                  | <i>PGM2</i>                        | Yes                                                        | No                                                                      | Yes                                                    |
| CAGL0L08008g | -                       | 3,39                      | -                                        | No Description Available                                                                                                                                                                                                        | <i>PMP2</i>                        | Not described                                              | Yes                                                                     | No                                                     |
| CAGL0G05269g | -                       | 3,27                      | -                                        | Putative mitochondrial protein; gene is downregulated in azole-resistant strain                                                                                                                                                 | <i>FMP16</i>                       | Not described                                              | No                                                                      | No                                                     |
| CAGL0I09702g | -                       | 3,24                      | -                                        | Ortholog(s) have riboflavin transporter activity, role in riboflavin transport and plasma membrane localization                                                                                                                 | <i>MCH5</i>                        | Yes                                                        | Yes                                                                     | No                                                     |
| CAGL0E05148g | <i>CgDLD1</i>           | 3,23                      | -                                        | Ortholog(s) have alpha-mannosidase activity, role in oligosaccharide catabolic process and cytosol, fungal-type vacuole membrane localization                                                                                   | <i>AMS1</i>                        | Not described                                              | No                                                                      | No                                                     |
| CAGL0G02057g | -                       | 3,19                      | -                                        | Ortholog(s) have cytoplasm, nucleus localization                                                                                                                                                                                | <i>YKR075C</i>                     | Yes                                                        | No                                                                      | Yes                                                    |
| CAGL0H04851g | -                       | 3,18                      | -                                        | Ortholog(s) have 4-nitrophenylphosphatase activity, protein serine/threonine phosphatase activity and role in cellular protein localization, cellular sodium ion homeostasis, protein dephosphorylation                         | <i>PPZ1</i>                        | Not described                                              | No                                                                      | No                                                     |
| CAGL0A02002g | -                       | 3,16                      | -                                        | No Description Available                                                                                                                                                                                                        | <i>YOL024W</i>                     | Not described                                              | No                                                                      | No                                                     |
| CAGL0K07590g | <i>CgMYO3</i>           | 3,11                      | -                                        | Putative myosin                                                                                                                                                                                                                 | <i>MYO3</i>                        | Not described                                              | No                                                                      | No                                                     |
| CAGL0I05148g | <i>CgDLD1</i>           | 3,07                      | -                                        | D-lactate ferricytochrome C oxidoreductase                                                                                                                                                                                      | <i>DLD1</i>                        | Not described                                              | No                                                                      | No                                                     |
| CAGL0G02563g | -                       | 3,06                      | -                                        | Has domain(s) with predicted ubiquitin thiolesterase activity and role in ubiquitin-dependent protein catabolic process                                                                                                         | -                                  | -                                                          | -                                                                       | No                                                     |
| CAGL0G03179g | -                       | 3,06                      | -                                        | Has domain(s) with predicted phospholipid binding activity                                                                                                                                                                      | <i>*ASK10</i>                      | Not described                                              | Not tested                                                              | Yes                                                    |
| CAGL0A00495g | <i>CgPMA1</i>           | 2,98                      | -                                        | Putative plasma membrane proton pump with a predicted role in pH homeostasis                                                                                                                                                    | <i>*PMA1</i>                       | Not described                                              | Not tested                                                              | Yes                                                    |
| CAGL0A01870g | -                       | 2,97                      | -                                        | Has domain(s) with predicted integral to membrane localization                                                                                                                                                                  | -                                  | -                                                          | -                                                                       | No                                                     |
| CAGL0I06644g | -                       | 2,94                      | -                                        | Putative GPI-linked cell wall protein                                                                                                                                                                                           | <i>SPI1</i>                        | Not described                                              | No                                                                      | No                                                     |
| CAGL0M06897g | -                       | 2,91                      | -                                        | Ortholog(s) have cytoplasm localization                                                                                                                                                                                         | <i>YNL024C</i>                     | Yes                                                        | No                                                                      | Yes                                                    |
| CAGL0H07469g | -                       | 2,90                      | -                                        | Putative adhesin-like protein                                                                                                                                                                                                   | <i>ICS2</i>                        | Not described                                              | No                                                                      | No                                                     |
| CAGL0G05698g | <i>CgGDH2</i>           | 2,89                      | -                                        | Ortholog(s) have glutamate dehydrogenase (NAD <sup>+</sup> ) activity, role in nitrogen compound metabolic process and cytosol, mitochondrion localization                                                                      | <i>GDH2</i>                        | Not described                                              | No                                                                      | Yes                                                    |
| CAGL0A01716g | -                       | 2,87                      | -                                        | Ortholog(s) have nicotinamidase activity, role in chromatin silencing at rDNA, chromatin silencing at telomere, replicative cell aging and cytosol, nucleus, peroxisome localization                                            | <i>PNC1</i>                        | Not described                                              | No                                                                      | No                                                     |
| CAGL0E03630g | -                       | 2,84                      | -                                        | Ortholog(s) have RNA binding activity and role in negative regulation of conjugation with cellular fusion, premeiotic DNA replication, reciprocal meiotic recombination, sporulation resulting in formation of a cellular spore | <i>RIM4</i>                        | Not described                                              | No                                                                      | No                                                     |
| CAGL0J11462g | -                       | 2,84                      | -                                        | Predicted GPI-linked cell wall protein                                                                                                                                                                                          | <i>YNL190W</i>                     | Not described                                              | No                                                                      | Yes                                                    |
| CAGL0G03267g | -                       | 2,80                      | -                                        | Ortholog(s) have role in protein targeting to membrane and cytoplasm localization                                                                                                                                               | <i>AST2</i>                        | Not described                                              | No                                                                      | No                                                     |
| CAGL0A01650g | -                       | 2,80                      | -                                        | Putative protein; gene is upregulated in azole-resistant strain                                                                                                                                                                 | <i>ECL1</i>                        | Yes                                                        | No                                                                      | Yes                                                    |

|              |               |      |   |                                                                                                                                                                                                                         |                |               |     |     |
|--------------|---------------|------|---|-------------------------------------------------------------------------------------------------------------------------------------------------------------------------------------------------------------------------|----------------|---------------|-----|-----|
| CAGL0E01749g | <i>CgYPS4</i> | 2,78 | - | Putative aspartic protease; member of a YPS gene cluster that is required for virulence in mice; induced in response to low pH and high temperature                                                                     | <i>YPS1</i>    | Not described | No  | No  |
| CAGL0K02145g | -             | 2,71 | - | Has domain(s) with predicted nucleic acid binding activity                                                                                                                                                              | <i>YER130C</i> | Not described | No  | Yes |
| CAGL0L05786g | -             | 2,71 | - | Ortholog(s) have sequence-specific DNA binding activity                                                                                                                                                                 | <i>YPR013C</i> | Not described | No  | No  |
| CAGL0F03707g | -             | 2,71 | - | Ortholog(s) have protein kinase activity, role in cellular ion homeostasis, protein phosphorylation and cytoplasm localization                                                                                          | <i>HRK1</i>    | Yes           | Yes | Yes |
| CAGL0D03322g | -             | 2,70 | - | Ortholog(s) have role in cellular zinc ion homeostasis and endoplasmic reticulum localization                                                                                                                           | <i>IZH3</i>    | Yes           | No  | Yes |
| CAGL0G09603g | -             | 2,69 | - | Putative protein; gene is upregulated in azole-resistant strain                                                                                                                                                         | <i>YOR186W</i> | -             | No  | Yes |
| CAGL0G01474g | -             | 2,66 | - | Ortholog(s) have role in cellular response to methylmercury and cytoplasm, nucleus localization                                                                                                                         | <i>BOP3</i>    | Not described | No  | Yes |
| CAGL0J03080g | -             | 2,65 | - | No Description Available                                                                                                                                                                                                | <i>RG11</i>    | Yes           | No  | Yes |
| CAGL0L08030g | -             | 2,64 | - | Ortholog(s) have asparagine-tRNA ligase activity, role in mitochondrial asparaginyl-tRNA aminoacylation and mitochondrion localization                                                                                  | <i>SLM5</i>    | Not described | No  | No  |
| CAGL0F07117g | -             | 2,63 | - | Putative subunit of the heterotrimeric G protein; gene is upregulated in azole-resistant strain                                                                                                                         | <i>GPG1</i>    | Yes           | No  | Yes |
| CAGL0L03696g | -             | 2,62 | - | Has domain(s) with predicted role in transmembrane transport and integral to membrane localization                                                                                                                      | <i>ECM3</i>    | Not described | No  | Yes |
| CAGL0G04081g | -             | 2,60 | - | Ortholog(s) have Golgi apparatus, cell division site, cell tip, endoplasmic reticulum localization                                                                                                                      | <i>THI73</i>   | Not described | No  | Yes |
| CAGL0C03740g | -             | 2,59 | - | Ortholog(s) have sequence-specific DNA binding, sequence-specific DNA binding transcription factor activity                                                                                                             | <i>MIT1</i>    | Not described | Yes | Yes |
| CAGL0J04026g | -             | 2,56 | - | No Description Available                                                                                                                                                                                                | <i>HER1</i>    | Not described | No  | No  |
| CAGL0I04246g | -             | 2,56 | - | Putative transcription factor involved in sterol uptake; gene is upregulated in azole-resistant strain                                                                                                                  | <i>SUT2</i>    | Not described | No  | No  |
| CAGL0H08778g | -             | 2,55 | - | Ortholog(s) have mRNA binding activity, role in nuclear-transcribed mRNA catabolic process, deadenylation-dependent decay and cytoplasm localization                                                                    | <i>PUF2</i>    | Not described | No  | Yes |
| CAGL0K09372g | -             | 2,47 | - | Ortholog(s) have RNA polymerase II core promoter proximal region sequence-specific DNA binding, more                                                                                                                    | <i>MIG2</i>    | Not described | No  | Yes |
| CAGL0J00715g | -             | 2,46 | - | Has domain(s) with predicted GTP binding, GTPase activity, role in GTP catabolic process, protein transport, signal transduction, small GTPase mediated signal transduction and intracellular, membrane localization    | <i>YHR022C</i> | Not described | No  | Yes |
| CAGL0I05060g | -             | 2,43 | - | Has domain(s) with predicted DNA binding, chromatin binding activity                                                                                                                                                    | <i>DOT6</i>    | Not described | No  | No  |
| CAGL0D05566g | -             | 2,42 | - | Ortholog(s) have sterol esterase activity, role in cell wall mannoprotein biosynthetic process, sterol metabolic process and integral to membrane, plasma membrane localization                                         | <i>YEH2</i>    | Not described | Yes | Yes |
| CAGL0K06853g | -             | 2,38 | - | Ortholog(s) have mRNA binding activity, role in cellular response to cadmium ion, detoxification of cadmium ion and cytosol, peroxisomal matrix, peroxisomal membrane localization                                      | <i>PCS60</i>   | Not described | No  | No  |
| CAGL0H02519g | -             | 2,37 | - | Ortholog(s) have cytoplasm localization                                                                                                                                                                                 | <i>YMR253C</i> | Not described | No  | Yes |
| CAGL0M00748g | <i>CgECM7</i> | 2,36 | - | Putative integral membrane protein required for high-affinity Ca <sup>2+</sup> influx                                                                                                                                   | <i>ECM7</i>    | Not described | No  | Yes |
| CAGL0B01875g | -             | 2,33 | - | Ortholog(s) have mitochondrial inner membrane localization                                                                                                                                                              | <i>COX26</i>   | Not described | No  | Yes |
| CAGL0F08217g | -             | 2,30 | - | Ortholog(s) have cytoplasmic stress granule localization                                                                                                                                                                | <i>YGR250C</i> | Yes           | No  | No  |
| CAGL0J06028g | <i>CgMEP2</i> | 2,27 | - | Ortholog(s) have high affinity secondary active ammonium transmembrane transporter activity, methylammonium transmembrane transporter activity                                                                          | <i>MEP2</i>    | Not described | No  | Yes |
| CAGL0D04026g | -             | 2,27 | - | Ortholog(s) have 4-aminobutyrate transaminase activity, pyridoxal phosphate binding activity, role in gamma-aminobutyric acid catabolic process, glutamate metabolic process and cytosol localization                   | <i>UGA1</i>    | Not described | No  | No  |
| CAGL0K07458g | -             | 2,20 | - | Has domain(s) with predicted ATP binding, protein kinase activity, protein serine/threonine kinase activity, protein tyrosine kinase activity, transferase activity, transferring phosphorus-containing groups activity | <i>YPK1</i>    | Not described | No  | Yes |
| CAGL0K02651g | -             | 2,19 | - | Ortholog(s) have role in chloride transport and fungal-type vacuole localization                                                                                                                                        | <i>YHL008C</i> | Not described | No  | Yes |
| CAGL0H08888g | -             | 2,18 | - | Ortholog(s) have FAD transmembrane transporter activity, role in FAD transport, fungal-type cell wall biogenesis, protein folding and cellular bud neck, endoplasmic reticulum, fungal-type vacuole localization        | <i>FLC3</i>    | Not described |     | Yes |
| CAGL0F03641g | -             | 2,18 | - | Has domain(s) with predicted membrane localization                                                                                                                                                                      | <i>NA</i>      | -             | -   | Yes |
| CAGL0I09108g | -             | 2,18 | - | Has domain(s) with predicted role in transmembrane transport and integral to membrane localization                                                                                                                      | <i>NA</i>      | -             | -   | Yes |
| CAGL0C05071g | -             | 2,15 | - | Ortholog(s) have hydroxymethylpyrimidine kinase activity, phosphomethylpyrimidine kinase activity, thiaminase activity, role in thiamine biosynthetic process, thiamine catabolic process and cytosol localization      | <i>THI20</i>   | Yes           | No  | No  |

|              |                |      |   |                                                                                                                                                                                                                                          |                |               |     |     |
|--------------|----------------|------|---|------------------------------------------------------------------------------------------------------------------------------------------------------------------------------------------------------------------------------------------|----------------|---------------|-----|-----|
| CAGL0K12144g | <i>CgFES1</i>  | 2,13 | - | Putative Hsp70p nucleotide exchange factor; protein abundance decreased in ace2 mutant cells                                                                                                                                             | <i>FES1</i>    | Not described | No  | Yes |
| CAGL0H00110g | -              | 2,13 | - | Adhesin-like protein with internal repeats; predicted GPI-anchor; likely a C-terminal fragment of a single ORF with CAGL0H00132g                                                                                                         | -              | -             | -   | Yes |
| CAGL0M03179g | -              | 2,13 | - | Ortholog(s) have cytosol, nucleus localization                                                                                                                                                                                           | <i>YKR018C</i> | Not described | No  | Yes |
| CAGLOG07183g | -              | 2,13 | - | Ortholog(s) have cytoplasm localization                                                                                                                                                                                                  | <i>NA</i>      | -             | -   | Yes |
| CAGL0B00902g | <i>CgHIS4</i>  | 2,13 | - | Phosphoribosyl-AMP cyclohydrolase; phosphoribosyl-ATP pyrophosphatase; histidinol dehydrogenase                                                                                                                                          | <i>HIS4</i>    | Not described | No  | Yes |
| CAGL0K12100g | -              | 2,12 | - | Putative coproporphyrinogen III oxidase; protein differentially expressed in azole resistant strain                                                                                                                                      | <i>*HEM13</i>  | Not described | No  | Yes |
| CAGL0D04422g | -              | 2,11 | - | Ortholog(s) have endoplasmic reticulum localization                                                                                                                                                                                      | <i>YPL279C</i> | Not described | No  | Yes |
| CAGL0I09086g | -              | 2,11 | - | Ortholog(s) have endoplasmic reticulum, mitochondrion localization                                                                                                                                                                       | <i>ESBP6</i>   | Not described | No  | Yes |
| CAGL0E06292g | -              | 2,10 | - | Has domain(s) with predicted GTP binding, GTPase activity, role in GTP catabolic process, protein transport, signal transduction, small GTPase mediated signal transduction and intracellular, membrane localization                     | <i>YHR022C</i> | Not described | No  | No  |
| CAGL0L05236g | <i>CgMDH1</i>  | 2,08 | - | Malate dehydrogenase                                                                                                                                                                                                                     | <i>MDH1</i>    | Not described | No  | Yes |
| CAGL0H08261g | -              | 2,05 | - | No Description Available                                                                                                                                                                                                                 | <i>YOR019W</i> | Not described | No  | Yes |
| CAGL0K10428g | -              | 2,05 | - | No Description Available                                                                                                                                                                                                                 | <i>IGD1</i>    | Yes           | No  | No  |
| CAGL0L12012g | -              | 2,04 | - | Ortholog(s) have trans-aconitate 3-methyltransferase activity and cytosol localization                                                                                                                                                   | <i>TMT1</i>    | Not described | No  | No  |
| CAGL0L10758g | <i>CgPFK2</i>  | 2,03 | - | Putative 6-phosphofruktokinase, beta subunit; protein abundance increased in ace2 mutant cells                                                                                                                                           | <i>PFK2</i>    | Not described | Yes | Yes |
| CAGL0K07546g | <i>CgPMU2</i>  | 2,03 | - | Putative phosphate starvation inducible acid phosphatase; contains a phosphomutase-like domain; functionally complements a <i>S. cerevisiae</i> pho5 mutant; transcript abundance during phosphate starvation regulated by Pho4p         | -              | -             | -   | No  |
| CAGL0E06072g | -              | 2,02 | - | Ortholog(s) have cytoplasm localization                                                                                                                                                                                                  | <i>YMR181C</i> | -             | No  | Yes |
| CAGL0J05060g | -              | 1,98 | - | Ortholog(s) have RNA polymerase II regulatory region sequence-specific DNA binding, sequence-specific DNA binding RNA polymerase II transcription factor activity, zinc ion binding activity                                             | <i>ZAP1</i>    | Not described | No  | Yes |
| CAGL0E05588g | -              | 1,97 | - | Ortholog(s) have DNA-directed DNA polymerase activity, deoxycytidyl transferase activity and role in error-free translesion synthesis, error-prone translesion synthesis                                                                 | <i>REV1</i>    | Not described | No  | Yes |
| CAGL0K01155g | -              | 1,97 | - | No Description Available                                                                                                                                                                                                                 | <i>YGR079W</i> | Not described | No  | Yes |
| CAGL0M06347g | -              | 1,97 | - | Ortholog(s) have dihydroceramidase activity, role in ceramide biosynthetic process, ceramide catabolic process and endoplasmic reticulum, fungal-type vacuole membrane localization                                                      | <i>YPC1</i>    | Yes           | No  | Yes |
| CAGL0J09262g | -              | 1,95 | - | Ortholog(s) have role in negative regulation of ATPase activity and mitochondrion localization                                                                                                                                           | <i>STF1</i>    | Not described | No  | No  |
| CAGL0F02167g | -              | 1,94 | - | Ortholog(s) have DNA binding activity, role in reciprocal meiotic recombination and nuclear chromosome localization                                                                                                                      | <i>MSH4</i>    | Not described | No  | No  |
| CAGL0I01276g | -              | 1,93 | - | Ortholog(s) have cytoplasm, nucleus localization                                                                                                                                                                                         | <i>YHR112C</i> | Not described | No  | No  |
| CAGL0I07843g | <i>CgADH1</i>  | 1,93 | - | Putative alcohol dehydrogenase isoenzyme III; increased protein abundance in azole resistant strain                                                                                                                                      | <i>ADH1</i>    | Not described | No  | Yes |
| CAGL0B02475g | <i>CgPHO84</i> | 1,93 | - | Ortholog(s) have inorganic phosphate transmembrane transporter activity, manganese ion transmembrane transporter activity and role in manganese ion transport, phosphate ion transport, polyphosphate metabolic process                  | <i>PHO84</i>   | Not described | No  | Yes |
| CAGL0K07183g | -              | 1,92 | - | Unknown                                                                                                                                                                                                                                  | -              | -             | -   | No  |
| CAGL0H08305g | -              | 1,91 | - | No Description Available                                                                                                                                                                                                                 | <i>DET1</i>    | Not described | No  | No  |
| CAGL0I00550g | -              | 1,91 | - | Ortholog(s) have fungal-type vacuole membrane, nucleus localization                                                                                                                                                                      | <i>YLR297W</i> | Yes           | No  | Yes |
| CAGL0F03399g | <i>CgSCS7</i>  | 1,88 | - | Ortholog(s) have fatty acid alpha-hydroxylase activity, role in cellular response to cadmium ion, detoxification of cadmium ion, mannosyl-inositol phosphorylceramide metabolic process and endoplasmic reticulum, membrane localization | <i>SCS7</i>    | Not described | Yes | Yes |
| CAGL0H08195g | -              | 1,88 | - | Ortholog(s) have ATPase inhibitor activity, Hsp70 protein binding, Hsp90 protein binding, mRNA binding activity, role in protein folding and cytosol, nucleus localization                                                               | <i>STI1</i>    | Not described | No  | Yes |
| CAGL0M03135g | -              | 1,87 | - | Ortholog(s) have cell division site, cell tip, cytosol localization                                                                                                                                                                      | <i>ALY2</i>    | Not described | No  | No  |
| CAGL0L03267g | <i>CgGAP1</i>  | 1,87 | - | Ortholog(s) have L-proline transmembrane transporter activity, polyamine transmembrane transporter activity and role in amino acid transport, polyamine transport, regulation of nitrogen utilization                                    | <i>GAP1</i>    | Not described | No  | Yes |
| CAGL0C00319g | -              | 1,85 | - | Ortholog(s) have carboxypeptidase activity, role in nitrogen compound metabolic process, proteolysis involved in cellular protein catabolic process and fungal-type vacuole lumen localization                                           | <i>CPS1</i>    | Not described | No  | No  |
| CAGL0L10582g | -              | 1,85 | - | Ortholog(s) have cytoplasm localization                                                                                                                                                                                                  | <i>YMR196W</i> | Not described | No  | Yes |
| CAGL0F00605g | <i>CgGLK1</i>  | 1,85 | - | Aldohexose specific glucokinase                                                                                                                                                                                                          | <i>EMI2</i>    | Not described | No  | Yes |

|              |                    |      |   |                                                                                                                                                                                                                                                                                                                                                                                                                                                                                     |                  |               |     |     |
|--------------|--------------------|------|---|-------------------------------------------------------------------------------------------------------------------------------------------------------------------------------------------------------------------------------------------------------------------------------------------------------------------------------------------------------------------------------------------------------------------------------------------------------------------------------------|------------------|---------------|-----|-----|
| CAGL0K07678g | -                  | 1,84 | - | Unknown                                                                                                                                                                                                                                                                                                                                                                                                                                                                             | -                | -             | -   | Yes |
| CAGL0K05357g | <i>CgGLN1</i>      | 1,84 | - | Ortholog(s) have glutamate-ammonia ligase activity, role in cellular response to nitrogen starvation, glutamine biosynthetic process, nitrogen utilization and cytosol, nucleus localization                                                                                                                                                                                                                                                                                        | <i>*GLN1</i>     | Yes           | No  | Yes |
| CAGL0E06116g | -                  | 1,84 | - | Has domain(s) with predicted nucleic acid binding activity                                                                                                                                                                                                                                                                                                                                                                                                                          | <i>RGM1</i>      | -             | No  | Yes |
| CAGL0H04037g | -                  | 1,84 | - | Ortholog(s) have heat shock protein binding activity, role in glycogen metabolic process, meiosis, mitotic spindle assembly checkpoint, response to heat and protein phosphatase type 1 complex localization                                                                                                                                                                                                                                                                        | <i>GAC1</i>      | Not described | No  | No  |
| CAGL0B04675g | -                  | 1,83 | - | No Description Available                                                                                                                                                                                                                                                                                                                                                                                                                                                            | <i>YCL001W-B</i> | Not described | No  | Yes |
| CAGL0F09207g | <i>CgBAT1</i>      | 1,82 | - | Has domain(s) with predicted branched-chain-amino-acid transaminase activity, catalytic activity and role in branched-chain amino acid metabolic process, metabolic process                                                                                                                                                                                                                                                                                                         | <i>BAT1</i>      | Not described | No  | No  |
| CAGL0A01782g | <i>CgHXT4</i>      | 1,80 | - | Ortholog(s) have glucose transmembrane transporter activity, pentose transmembrane transporter activity and plasma membrane localization                                                                                                                                                                                                                                                                                                                                            | <i>HXT4</i>      | Not described | No  | Yes |
| CAGL0K07205g | -                  | 1,79 | - | No Description Available                                                                                                                                                                                                                                                                                                                                                                                                                                                            | <i>YGL117W</i>   | Not described | No  | Yes |
| CAGL0H02387g | -                  | 1,78 | - | Putative trehalose-6-phosphate synthase/phosphatase subunit; gene is upregulated in azole-resistant strain                                                                                                                                                                                                                                                                                                                                                                          | <i>TPS3</i>      | Not described | No  | Yes |
| CAGL0G02101g | <i>CgECM4</i>      | 1,77 | - | Putative omega class glutathione transferase; gene is downregulated in azole-resistant strain                                                                                                                                                                                                                                                                                                                                                                                       | <i>ECM4</i>      | Not described | No  | Yes |
| CAGL0K02101g | -                  | 1,76 | - | Ortholog(s) have role in TOR signaling cascade, cellular response to chemical stimulus, cellular response to heat, cellular response to pH and chlamydospore formation, more                                                                                                                                                                                                                                                                                                        | <i>PMD1</i>      | -             | No  | No  |
| CAGL0B00264g | <i>CgMTLalpha2</i> | 1,75 | - | Homeobox-domain protein alpha2                                                                                                                                                                                                                                                                                                                                                                                                                                                      | <i>HMLalpha2</i> | Not described | No  | No  |
| CAGL0F09273g | -                  | 1,75 | - | Putative adhesin-like protein                                                                                                                                                                                                                                                                                                                                                                                                                                                       | -                | -             | -   | No  |
| CAGL0K01683g | <i>CgGPD1</i>      | 1,74 | - | Putative cytoplasmic glycerol-3-phosphate dehydrogenase (NAD+); protein abundance increased in ace2 mutant cells                                                                                                                                                                                                                                                                                                                                                                    | <i>GPD1</i>      | Not described | No  | No  |
| CAGL0B03817g | -                  | 1,74 | - | Ortholog(s) have cytosol, nucleus localization                                                                                                                                                                                                                                                                                                                                                                                                                                      | <i>MHO1</i>      | Not described | No  | No  |
| CAGL0K05665g | -                  | 1,73 | - | Has domain(s) with predicted catalytic activity, pyridoxal phosphate binding activity                                                                                                                                                                                                                                                                                                                                                                                               | -                | Not described | -   | Yes |
| CAGL0M03245g | -                  | 1,73 | - | Ortholog(s) have cytosol localization                                                                                                                                                                                                                                                                                                                                                                                                                                               | <i>YEL020C</i>   | Not described | No  | No  |
| CAGL0M04807g | <i>CgSNF2</i>      | 1,73 | - | Component of the chromatin remodelling Swi/Snf complex; involved in regulation of biofilm formation                                                                                                                                                                                                                                                                                                                                                                                 | <i>SNF2</i>      | Not described | No  | No  |
| CAGL0G08888g | -                  | 1,73 | - | Ortholog(s) have role in maintenance of rDNA, meiotic chromosome segregation, recombinational repair and Shu complex, cytoplasm, nucleus localization                                                                                                                                                                                                                                                                                                                               | <i>CSM2</i>      | Not described | No  | No  |
| CAGL0M06765g | -                  | 1,73 | - | Ortholog(s) have role in actin filament organization, endocytosis, response to stress and cytosol, nucleus localization                                                                                                                                                                                                                                                                                                                                                             | <i>SIW14</i>     | Not described | Yes | Yes |
| CAGL0E05610g | -                  | 1,72 | - | Ortholog(s) have role in cellular response to nitrogen starvation, negative regulation of G0 to G1 transition and cytosol localization                                                                                                                                                                                                                                                                                                                                              | <i>PYK2</i>      | -             | No  | Yes |
| CAGL0J08074g | -                  | 1,72 | - | Ortholog(s) have phosphatidylinositol transporter activity                                                                                                                                                                                                                                                                                                                                                                                                                          | <i>PDR17</i>     | Yes           | No  | No  |
| CAGL0J07502g | -                  | 1,71 | - | Putative protein similar to globins with a heme-binding domain; gene is upregulated in azole-resistant strain                                                                                                                                                                                                                                                                                                                                                                       | <i>YNL234W</i>   | Not described | No  | No  |
| CAGL0C01551g | -                  | 1,70 | - | Has domain(s) with predicted DNA binding, sequence-specific DNA binding, sequence-specific DNA binding transcription factor activity and role in regulation of transcription, DNA-dependent                                                                                                                                                                                                                                                                                         | <i>CUP9</i>      | Not described | No  | Yes |
| CAGL0H10164g | -                  | 1,69 | - | Ortholog(s) have role in premeiotic DNA replication and cytoplasm localization                                                                                                                                                                                                                                                                                                                                                                                                      | <i>MUM2</i>      | Not described | No  | No  |
| CAGL0M02915g | -                  | 1,69 | - | Ortholog(s) have role in peroxisome degradation and peroxisome localization                                                                                                                                                                                                                                                                                                                                                                                                         | <i>ATG36</i>     | Not described | No  | Yes |
| CAGL0H05379g | -                  | 1,69 | - | Ortholog(s) have RNA polymerase II core promoter proximal region sequence-specific DNA binding, more                                                                                                                                                                                                                                                                                                                                                                                | <i>*GCR1</i>     | Yes           | No  | No  |
| CAGL0L05016g | -                  | 1,68 | - | Ortholog(s) have Sin3-type complex localization                                                                                                                                                                                                                                                                                                                                                                                                                                     | <i>STB2</i>      | Not described | No  | No  |
| CAGL0B01265g | <i>CgMATalpha2</i> | 1,68 | - | Mating-type regulatory protein alpha2; expressed in all MTL.alpha strains and not in MTL.a strains                                                                                                                                                                                                                                                                                                                                                                                  | <i>MATalpha2</i> | Not described | No  | No  |
| CAGL0H10626g | <i>AWP13</i>       | 1,67 | - | Predicted cell wall adhesin with a predicted role in adhesion; predicted GPI anchor; contains tandem repeats                                                                                                                                                                                                                                                                                                                                                                        | -                | -             | -   | Yes |
| CAGL0L06006g | -                  | 1,67 | - | Ortholog(s) have protein serine/threonine kinase activity                                                                                                                                                                                                                                                                                                                                                                                                                           | <i>*ATG1</i>     | Not described | No  | No  |
| CAGL0E04548g | -                  | 1,67 | - | Ortholog(s) have mitochondrion localization                                                                                                                                                                                                                                                                                                                                                                                                                                         | <i>YOR020W-A</i> | Not described | No  | No  |
| CAGL0M01716g | -                  | 1,66 | - | Transcription factor targeting filamentation genes and Tyl1 expression; Ste12p activation of most filamentation gene promoters depends on Tec1p and Tec1p transcriptional activity is dependent on its association with Ste12p; binds to TCS elements upstream of filamentation genes, which are regulated by Tec1p/Ste12p/Dig1p complex; competes with Dig2p for binding to Ste12p/Dig1p; positive regulator of chronological life span; TEA/ATTS DNA-binding domain family member | <i>TEC1</i>      | Not described | No  | Yes |
| CAGL0C02365g | -                  | 1,64 | - | Unknown                                                                                                                                                                                                                                                                                                                                                                                                                                                                             | -                | -             | -   | Yes |

|              |         |      |   |                                                                                                                                                                                                                                                |                |               |     |     |
|--------------|---------|------|---|------------------------------------------------------------------------------------------------------------------------------------------------------------------------------------------------------------------------------------------------|----------------|---------------|-----|-----|
| CAGL0I05698g | -       | 1,64 | - | Ortholog(s) have 6-phosphofructokinase activity, mRNA binding activity, role in glycolysis, proton transport and 6-phosphofructokinase complex, mitochondrion localization                                                                     | <i>PFK2</i>    | Not described | Yes | Yes |
| CAGL0F02101g | -       | 1,64 | - | No Description Available                                                                                                                                                                                                                       | <i>BLM10</i>   | Not described | No  | No  |
| CAGL0L11990g | -       | 1,63 | - | Ortholog(s) have disulfide oxidoreductase activity, role in actin cytoskeleton organization, cellular iron ion homeostasis, cellular response to oxidative stress and nucleus localization                                                     | <i>GRX4</i>    | Not described | No  | Yes |
| CAGL0F03003g | -       | 1,62 | - | Ortholog(s) have osmosensor activity and role in (1->3)-beta-D-glucan biosynthetic process, cellular bud site selection, fungal-type cell wall organization, hyperosmotic response, osmosensory signaling pathway via Sho1 osmosensor          | <i>*HKR1</i>   | Not described | No  | Yes |
| CAGL0M10439g | -       | 1,61 | - | Ortholog(s) have alpha,alpha-trehalase activity, calcium ion binding activity                                                                                                                                                                  | <i>NTH1</i>    | Not described | No  | No  |
| CAGL0L02453g | -       | 1,61 | - | No Description Available                                                                                                                                                                                                                       | <i>MIT1</i>    | Not described | Yes | No  |
| CAGL0E03025g | -       | 1,60 | - | No Description Available                                                                                                                                                                                                                       | <i>ECL1</i>    | Not described | No  | Yes |
| CAGL0H10120g | -       | 1,59 | - | Ortholog(s) have glucan endo-1,6-beta-glucosidase activity and cytosol, mitochondrial intermembrane space, nucleus localization                                                                                                                | <i>YBR056W</i> | Not described | No  | Yes |
| CAGL0L03157g | -       | 1,58 | - | Ortholog(s) have sequence-specific DNA binding, sequence-specific DNA binding RNA polymerase II transcription factor activity                                                                                                                  | <i>DAL80</i>   | Not described | No  | Yes |
| CAGL0M01364g | CgCBF3D | 1,58 | - | Evolutionarily conserved kinetochore protein that is part of multiple protein complexes, including the SCF ubiquitin ligase complex, the CBF3 complex that binds centromeric DNA, and the RAVE complex that regulates assembly of the V-ATPase | <i>SKP1</i>    | Not described | No  | Yes |
| CAGL0F00187g | -       | 1,57 | - | Ortholog(s) have copper ion transmembrane transporter activity, iron ion transmembrane transporter activity                                                                                                                                    | <i>FET4</i>    | Not described | No  | Yes |
| CAGL0C05027g | -       | 1,57 | - | Has domain(s) with predicted transferase activity, transferring acyl groups activity                                                                                                                                                           | <i>YAT1</i>    | Not described | No  | Yes |
| CAGL0E01529g | -       | 1,56 | - | Ortholog(s) have role in fructose 2,6-bisphosphate metabolic process, regulation of glycolysis                                                                                                                                                 | <i>PFK27</i>   | Yes           | No  | Yes |
| CAGL0I09009g | -       | 1,55 | - | Ortholog(s) have histidinol-phosphatase activity, role in histidine biosynthetic process and cytosol, nucleus localization                                                                                                                     | <i>HIS2</i>    | Not described | No  | No  |
| CAGL0E05808g | CgTHI6  | 1,54 | - | Bifunctional enzyme of thiamine biosynthesis, with thiamine-phosphate pyrophosphorylase and 4-methyl-5-beta-hydroxyethylthiazole kinase activities; active as a homohexamer                                                                    | <i>THI6</i>    | Not described | No  | Yes |
| CAGL0I10747g | -       | 1,54 | - | Ortholog(s) have ammonium transmembrane transporter activity, role in ammonium transport, nitrogen utilization and plasma membrane localization                                                                                                | <i>MEP3</i>    | Not described | No  | Yes |
| CAGL0H02541g | -       | 1,53 | - | Ortholog(s) have mitochondrion localization                                                                                                                                                                                                    | <i>YMR252C</i> | -             | No  | No  |
| CAGL0L08074g | -       | 1,53 | - | No Description Available                                                                                                                                                                                                                       | <i>SYP1</i>    | Not described | No  | No  |
| CAGL0L10912g | -       | 1,51 | - | Ortholog(s) have spermidine transmembrane transporter activity, spermine transmembrane transporter activity, role in spermidine transport, spermine transport and fungal-type vacuole membrane, plasma membrane localization                   | <i>TPO4</i>    | Not described | No  | Yes |
| CAGL0E03740g | -       | 1,51 | - | No Description Available                                                                                                                                                                                                                       | <i>YHL026C</i> | Not described | No  | Yes |
| CAGL0L03916g | -       | 1,50 | - | Has domain(s) with predicted nucleic acid binding activity                                                                                                                                                                                     | <i>AZF1</i>    | Not described | No  | No  |
| CAGL0B01595g | -       | 1,49 | - | Unknown                                                                                                                                                                                                                                        | -              | Not described | No  | Yes |
| CAGL0M10153g | -       | 1,49 | - | Ortholog(s) have MAP kinase kinase kinase activity, histone serine kinase activity                                                                                                                                                             | <i>STE20</i>   | Not described | No  | No  |
| CAGL0F02519g | -       | 1,48 | - | Has domain(s) with predicted DNA binding, sequence-specific DNA binding RNA polymerase II transcription factor activity, zinc ion binding activity and role in regulation of transcription, DNA-dependent, transcription, DNA-dependent        | <i>YJL206C</i> | Not described | No  | No  |
| CAGL0B04895g | -       | 1,48 | - | Ortholog(s) have RNA polymerase II core promoter proximal region sequence-specific DNA binding activity                                                                                                                                        | <i>RFX1</i>    | Not described | No  | No  |
| CAGL0K12078g | -       | 1,48 | - | Has domain(s) with predicted nucleic acid binding activity                                                                                                                                                                                     | <i>NRG1</i>    | Yes           | Yes | No  |
| CAGL0L09273g | -       | 1,48 | - | Ortholog(s) have methylisocitrate lyase activity, role in propionate catabolic process, 2-methylcitrate cycle and mitochondrial matrix localization                                                                                            | <i>ICL2</i>    | Not described | No  | No  |
| CAGL0A02145g | -       | 1,47 | - | Ortholog(s) have actin filament binding activity, role in actin cortical patch localization, actin filament bundle assembly, endocytosis and actin cortical patch localization                                                                 | <i>YSC84</i>   | Not described | No  | No  |
| CAGL0C04213g | -       | 1,47 | - | Ortholog(s) have role in vesicle-mediated transport and fungal-type vacuole, vesicle localization                                                                                                                                              | <i>RCR1</i>    | Not described | No  | No  |
| CAGL0K10824g | -       | 1,47 | - | No Description Available                                                                                                                                                                                                                       | <i>YLR149C</i> | Not described | No  | Yes |
| CAGL0H07997g | CgKNH1  | 1,46 | - | Protein involved in cell wall beta 1,6-glucan synthesis, similar to Kre9p                                                                                                                                                                      | <i>KNH1</i>    | Not described | No  | No  |
| CAGL0H09966g | -       | 1,46 | - | Ortholog(s) have mitochondrion localization                                                                                                                                                                                                    | <i>FMP23</i>   | Not described | No  | No  |

|              |               |      |   |                                                                                                                                                                                                                                         |                  |               |     |     |
|--------------|---------------|------|---|-----------------------------------------------------------------------------------------------------------------------------------------------------------------------------------------------------------------------------------------|------------------|---------------|-----|-----|
| CAGL0I04180g | <i>CgAMT1</i> | 1,46 | - | Metal-activated transcription factor; binds promoters of metallothionein genes; autoregulates its own expression; gene is downregulated in azole-resistant strain                                                                       | <i>*CUP2</i>     | Not described | No  | Yes |
| CAGL0E04004g | -             | 1,46 | - | Ortholog(s) have L-methionine transmembrane transporter activity and role in amino acid transport                                                                                                                                       | <i>MUP3</i>      | Not described | No  | Yes |
| CAGL0M03157g | -             | 1,46 | - | Ortholog(s) have role in autophagy, cellular response to starvation, chromatin silencing at rDNA, fungal-type cell wall organization, inositol lipid-mediated signaling and mitochondrion, pre-autophagosomal structure localization    | <i>IRS4</i>      | Not described | No  | No  |
| CAGL0D02948g | <i>CgKAR2</i> | 1,46 | - | Protein with a predicted role in nuclear fusion                                                                                                                                                                                         | <i>*KAR2</i>     | Not described | No  | Yes |
| CAGL0H10054g | -             | 1,46 | - | No Description Available                                                                                                                                                                                                                | <i>YBR053C</i>   | Not described | No  | Yes |
| CAGL0E00319g | -             | 1,46 | - | Unknown                                                                                                                                                                                                                                 | -                | Not described | -   | No  |
| CAGL0B02431g | -             | 1,45 | - | Ortholog(s) have NADH dehydrogenase (ubiquinone) activity and role in NADH oxidation, chronological cell aging, mitochondrial electron transport, NADH to ubiquinone, positive regulation of apoptotic process                          | <i>ND11</i>      | Not described | No  | Yes |
| CAGL0K08624g | -             | 1,45 | - | Ortholog(s) have RNA polymerase II activating transcription factor binding, more                                                                                                                                                        | <i>HAP4</i>      | Not described | No  | Yes |
| CAGL0M09449g | -             | 1,44 | - | No Description Available                                                                                                                                                                                                                | <i>ECM21</i>     | Not described | No  | No  |
| CAGL0I05522g | -             | 1,43 | - | Has domain(s) with predicted ubiquitin thioesterase activity and role in ubiquitin-dependent protein catabolic process                                                                                                                  | <i>UBP9</i>      | Not described | No  | Yes |
| CAGL0G09295g | -             | 1,43 | - | Ortholog(s) have cytoplasm localization                                                                                                                                                                                                 | <i>FYV8</i>      | Not described | No  | No  |
| CAGL0I02530g | -             | 1,43 | - | Ortholog(s) have N,N-dimethylaniline monooxygenase activity, role in protein folding and endoplasmic reticulum membrane, mitochondrion localization                                                                                     | <i>FMO1</i>      | Not described | No  | No  |
| CAGL0G09515g | -             | 1,42 | - | Ortholog(s) have glucan exo-1,3-beta-glucosidase activity, role in ascospore formation and ascospore wall localization                                                                                                                  | <i>SPR1</i>      | Not described | No  | No  |
| CAGL0C03267g | <i>CgFPS1</i> | 1,42 | - | Glycerol transporter; 1 of 2 Fps1 orthologs in <i>C. glabrata</i> ; double fps1/fps2 mutant accumulates glycerol, has constitutive cell wall stress, is hypersensitive to caspofungin in vitro and in vivo                              | <i>FPS1</i>      | Not described | Yes | Yes |
| CAGL0A03872g | -             | 1,42 | - | Ortholog(s) have phosphatidylinositol-4,5-bisphosphate binding activity, role in actin cortical patch assembly, actin filament organization, endocytosis and actin cortical patch, mating projection tip localization                   | <i>ENT2</i>      | Not described | No  | No  |
| CAGL0M07612g | -             | 1,41 | - | Ortholog(s) have polyamine oxidase activity, role in pantothenate biosynthetic process, polyamine catabolic process and cytoplasm localization                                                                                          | <i>FMS1</i>      | Not described | No  | Yes |
| CAGL0L03135g | -             | 1,41 | - | Putative phospholipase D; gene is upregulated in azole-resistant strain                                                                                                                                                                 | <i>SPO14</i>     | Not described | No  | Yes |
| CAGL0M06963g | -             | 1,41 | - | Ortholog(s) have role in tRNA export from nucleus and cytoplasm, nucleus localization                                                                                                                                                   | <i>SOL1</i>      | Not described | No  | Yes |
| CAGL0H04213g | -             | 1,41 | - | Ortholog(s) have sequence-specific DNA binding activity and nucleus localization                                                                                                                                                        | <i>TDA9</i>      | Not described | No  | No  |
| CAGL0F01793g | <i>CgERG3</i> | 1,41 | - | Delta 5,6 sterol desaturase; C-5 sterol desaturase; predicted transmembrane domain and endoplasmic reticulum (ER) binding motif, gene used for molecular typing of <i>C. glabrata</i> strain isolates                                   | <i>ERG3</i>      | Not described | Yes | No  |
| CAGL0L00583g | -             | 1,40 | - | Ortholog(s) have sequence-specific DNA binding, sequence-specific DNA binding transcription factor activity                                                                                                                             | <i>USV1</i>      | Not described | No  | Yes |
| CAGL0K01705g | -             | 1,39 | - | Ortholog(s) have cytoplasm localization                                                                                                                                                                                                 | <i>GPM2</i>      | Not described | No  | No  |
| CAGL0F04829g | -             | 1,39 | - | Ortholog(s) have role in negative regulation of Arp2/3 complex-mediated actin nucleation and actin cortical patch, nucleus localization                                                                                                 | <i>PIN3</i>      | Not described | No  | Yes |
| CAGL0H02893g | -             | 1,39 | - | Ortholog(s) have mitochondrion localization                                                                                                                                                                                             | <i>YJL070C</i>   | Not described | No  | No  |
| CAGL0G05357g | -             | 1,39 | - | Ortholog(s) have NADHX epimerase activity, role in nicotinamide nucleotide metabolic process and cytosol, mitochondrion, nucleus localization                                                                                           | <i>YNL200C</i>   | Yes           | Yes | No  |
| CAGL0D04510g | -             | 1,39 | - | No Description Available                                                                                                                                                                                                                | <i>YPR117W</i>   | Not described | No  | Yes |
| CAGL0I07227g | -             | 1,38 | - | Putative isocitrate dehydrogenase                                                                                                                                                                                                       | <i>IDH2</i>      | Not described | No  | Yes |
| CAGL0G06798g | -             | 1,38 | - | No Description Available                                                                                                                                                                                                                | <i>YJR005C-A</i> | Not described | No  | Yes |
| CAGL0M04763g | -             | 1,37 | - | Ortholog(s) have role in cellular response to drug and cytosol, nucleus localization                                                                                                                                                    | <i>YOR289W</i>   | Yes           | No  | Yes |
| CAGL0M10571g | -             | 1,37 | - | Ortholog(s) have ergosterol O-acyltransferase activity, role in ergosterol metabolic process and endoplasmic reticulum localization                                                                                                     | <i>ARE2</i>      | Not described | No  | Yes |
| CAGL0D01980g | -             | 1,37 | - | Ortholog(s) have sterol esterase activity, role in cellular lipid metabolic process, sterol metabolic process and integral to membrane, lipid particle localization                                                                     | <i>TGL1</i>      | Not described | No  | No  |
| CAGL0G05962g | -             | 1,37 | - | Ortholog(s) have endoplasmic reticulum localization                                                                                                                                                                                     | <i>YHR140W</i>   | Not described | No  | Yes |
| CAGL0B03421g | -             | 1,37 | - | Has domain(s) with predicted DNA binding, sequence-specific DNA binding RNA polymerase II transcription factor activity, zinc ion binding activity and role in regulation of transcription, DNA-dependent, transcription, DNA-dependent | <i>HAP1</i>      | Not described | No  | Yes |

|              |               |      |   |                                                                                                                                                                                                                                                  |                   |               |     |     |
|--------------|---------------|------|---|--------------------------------------------------------------------------------------------------------------------------------------------------------------------------------------------------------------------------------------------------|-------------------|---------------|-----|-----|
| CAGL0C03872g | <i>CgTIR3</i> | 1,36 | - | Putative GPI-linked cell wall protein involved in sterol uptake                                                                                                                                                                                  | <i>TIR3</i>       | Not described | No  | Yes |
| CAGL0C03289g | <i>CgYBT1</i> | 1,35 | - | Putative ABC transporter involved in bile acid transport; gene is upregulated in azole-resistant strain                                                                                                                                          | <i>YBT1</i>       | Not described | No  | Yes |
| CAGL0E02651g | -             | 1,35 | - | Has domain(s) with predicted identical protein binding, serine-type endopeptidase activity and role in negative regulation of catalytic activity, proteolysis                                                                                    | <i>YSP3</i>       | Not described | No  | No  |
| CAGL0C01595g | -             | 1,35 | - | Ortholog(s) have imidazoleglycerol-phosphate synthase activity, role in histidine biosynthetic process and cytosol, nucleus localization                                                                                                         | <i>HIS7</i>       | Not described | No  | No  |
| CAGL0F04785g | -             | 1,35 | - | Cytoplasmic protein of unknown function; identified as a high-copy suppressor of the synthetic lethality of a <i>sis2 sit4</i> double mutant, suggesting a role in G1/S phase progression; similar to Mif3p                                      | <i>VHS2</i>       | Not described | No  | Yes |
| CAGL0J07876g | -             | 1,34 | - | Ortholog(s) have cytoplasm, nucleus localization                                                                                                                                                                                                 | <i>RTC4</i>       | Yes           | No  | No  |
| CAGL0M12947g | <i>CgPUP1</i> | 1,34 | - | Mitochondria-localized protein; gene is upregulated in azole-resistant strain                                                                                                                                                                    | -                 | -             | -   | No  |
| CAGL0G06050g | -             | 1,34 | - | Unknown                                                                                                                                                                                                                                          | -                 | -             | -   | Yes |
| CAGL0L04598g | -             | 1,33 | - | Ortholog(s) have RNA 7-methylguanosine cap binding, m7G(5')pppN diphosphatase activity, role in deadenylation-dependent decapping of nuclear-transcribed mRNA and cytoplasmic mRNA processing body, cytosol, nucleus localization                | <i>DCS2</i>       | Not described | No  | Yes |
| CAGL0J02948g | <i>CgFCY2</i> | 1,33 | - | Purine-cytosine transporter                                                                                                                                                                                                                      | <i>FCY22</i>      | Not described | No  | Yes |
| CAGL0G00858g | -             | 1,33 | - | No Description Available                                                                                                                                                                                                                         | <i>MID2</i>       | Not described | No  | Yes |
| CAGL0L12892g | -             | 1,33 | - | Ortholog(s) have role in actin cytoskeleton organization, inositol lipid-mediated signaling, vacuole organization and plasma membrane localization                                                                                               | <i>SFK1</i>       | Not described | No  | No  |
| CAGL0L09251g | -             | 1,32 | - | Ortholog(s) have role in positive regulation of transcription from RNA polymerase II promoter, response to salt stress and cytoplasm localization                                                                                                | <i>HAL1</i>       | Not described | No  | Yes |
| CAGL0K11297g | -             | 1,31 | - | Ortholog(s) have gluconokinase activity, role in D-gluconate metabolic process and cytosol, nucleus localization                                                                                                                                 | <i>YDR248C</i>    | Not described | No  | Yes |
| CAGL0L07744g | -             | 1,31 | - | Ortholog(s) have endoplasmic reticulum localization                                                                                                                                                                                              | <i>ADP1</i>       | Not described | No  | Yes |
| CAGL0I05676g | -             | 1,30 | - | RNA-dependent ATPase in the DEAH-box family, required for activation of the spliceosome before the first transesterification step in RNA splicing; orthologous to human protein DHX16                                                            | <i>PRP2</i>       | Yes           | No  | Yes |
| CAGL0J08613g | -             | 1,29 | - | Ortholog(s) have calcium activated cation channel activity, calcium channel activity, potassium channel activity, sodium channel activity, voltage-gated ion channel activity and role in cellular cation homeostasis                            | <i>YVC1</i>       | Not described | No  | Yes |
| CAGL0L01287g | <i>CgUTR4</i> | 1,29 | - | Haloacid dehalogenase-like hydrolase                                                                                                                                                                                                             | <i>UTR4</i>       | Not described | No  | No  |
| CAGL0L10043g | -             | 1,29 | - | Ortholog(s) have protein kinase activator activity                                                                                                                                                                                               | <i>STD1</i>       | Yes           | No  | Yes |
| CAGL0H09944g | -             | 1,29 | - | Ortholog(s) have 2-alkenal reductase [NAD(P)] activity, AU-rich element binding, NADPH:quinone reductase activity, role in cellular response to oxidative stress and cytosol, nucleus localization                                               | <i>ZTA1</i>       | Not described | No  | No  |
| CAGL0G01100g | -             | 1,29 | - | Ortholog(s) have cytosol localization                                                                                                                                                                                                            | <i>YLR345W</i>    | Not described | No  | Yes |
| CAGL0C01771g | -             | 1,29 | - | Ortholog(s) have role in protein targeting to vacuole and mitochondrion localization                                                                                                                                                             | <i>YBR241C</i>    | Not described | Yes | No  |
| CAGL0H03135g | MFalpha       | 1,29 | - | Mating pheromone alpha-factor, made by alpha cells; interacts with mating type a cells to induce cell cycle arrest and other responses leading to mating; also encoded by MF(ALPHA)1, which is more highly expressed than MF(ALPHA)2             | <i>MF(ALPHA)2</i> | Not described | No  | No  |
| CAGL0J11308g | -             | 1,28 | - | Has domain(s) with predicted ATP binding, protein kinase activity, protein tyrosine kinase activity, transferase activity, transferring phosphorus-containing groups activity and role in protein phosphorylation                                | <i>NPR1</i>       | Not described | No  | Yes |
| CAGL0I10648g | <i>CgASN2</i> | 1,28 | - | Putative asparagine synthetase; protein abundance increased in <i>acc2</i> mutant cells                                                                                                                                                          | <i>ASN2</i>       | Not described | No  | No  |
| CAGL0J01699g | -             | 1,28 | - | No Description Available                                                                                                                                                                                                                         | <i>YPR010C-A</i>  | Not described | No  | Yes |
| CAGL0A01045g | -             | 1,28 | - | Fumarase, converts fumaric acid to L-malic acid in the TCA cycle; cytosolic and mitochondrial distribution determined by the N-terminal targeting sequence, protein conformation, and status of glyoxylate shunt; phosphorylated in mitochondria | <i>FUM1</i>       | Not described | Yes | Yes |
| CAGL0K00803g | <i>CgTRX2</i> | 1,28 | - | Cytoplasmic thioredoxin isoenzyme of the thioredoxin system which protects cells against oxidative and reductive stress, forms LMA1 complex with Pbi2p, acts as a cofactor for Tsa1p, required for ER-Golgi transport and vacuole inheritance    | <i>TRX1</i>       | Yes           | No  | Yes |

|              |                |      |   |                                                                                                                                                                                                                                                                                                                                    |                  |               |    |     |
|--------------|----------------|------|---|------------------------------------------------------------------------------------------------------------------------------------------------------------------------------------------------------------------------------------------------------------------------------------------------------------------------------------|------------------|---------------|----|-----|
| CAGL0F04609g | -              | 1,27 | - | Ortholog(s) have ubiquitin binding activity, role in endocytosis, endoplasmic reticulum unfolded protein response and actin cortical patch, cellular bud neck, cellular bud tip, mating projection tip localization                                                                                                                | <i>EDE1</i>      | Not described | No | No  |
| CAGL0L05654g | -              | 1,27 | - | Ortholog(s) have chloride transmembrane transporter activity, potassium ion transmembrane transporter activity                                                                                                                                                                                                                     | <i>TRK2</i>      | Not described | No | Yes |
| CAGL0C05533g | -              | 1,27 | - | Has domain(s) with predicted phosphoric diester hydrolase activity and role in lipid metabolic process                                                                                                                                                                                                                             | <i>AIM6</i>      | Not described | No | Yes |
| CAGL0M07293g | -              | 1,27 | - | Putative ABC transporter of weak organic acids; gene is downregulated in azole-resistant strain                                                                                                                                                                                                                                    | <i>PDR12</i>     | Yes           | No | No  |
| CAGL0M11726g | -              | 1,27 | - | Putative GPI-linked cell wall adhesin-like protein;                                                                                                                                                                                                                                                                                | <i>CCW12</i>     | Yes           | No | Yes |
| CAGL0E02321g | -              | 1,26 | - | Putative phospholipase B; predicted GPI-anchor                                                                                                                                                                                                                                                                                     | <i>PLB3</i>      | Yes           | No | No  |
| CAGL0F05687g | -              | 1,26 | - | Ortholog(s) have cytoplasm, ribosome localization                                                                                                                                                                                                                                                                                  | <i>YDR186C</i>   | Yes           | No | No  |
| CAGL0I05082g | -              | 1,26 | - | Ortholog(s) have role in DNA damage checkpoint, G2/M transition of mitotic cell cycle, cellular response to biotic stimulus and cellular response to starvation, more                                                                                                                                                              | <i>PIN4</i>      | Yes           | No | No  |
| CAGL0C04191g | -              | 1,25 | - | Succinate semialdehyde dehydrogenase involved in the utilization of gamma-aminobutyrate (GABA) as a nitrogen source; part of the 4-aminobutyrate and glutamate degradation pathways; localized to the cytoplasm                                                                                                                    | <i>UGA2</i>      | Not described | No | Yes |
| CAGL0I11011g | -              | 1,25 | - | Putative adhesin                                                                                                                                                                                                                                                                                                                   | -                | Not described | -  | No  |
| CAGL0C01397g | -              | 1,24 | - | Has domain(s) with predicted 6-phosphofructo-2-kinase activity, ATP binding, catalytic activity and role in fructose 2,6-bisphosphate metabolic process, fructose metabolic process                                                                                                                                                | <i>PFK26</i>     | Not described | No | Yes |
| CAGL0J00803g | -              | 1,24 | - | Ortholog(s) have structural constituent of cytoskeleton activity                                                                                                                                                                                                                                                                   | <i>MHP1</i>      | Not described | No | Yes |
| CAGL0L06864g | -              | 1,24 | - | Putative protein related to ECM3; gene is downregulated in azole-resistant strain                                                                                                                                                                                                                                                  | <i>SIP5</i>      | Yes           | No | No  |
| CAGL0I03872g | -              | 1,24 | - | Has domain(s) with predicted substrate-specific transmembrane transporter activity, transmembrane transporter activity, role in transmembrane transport and integral to membrane, membrane localization                                                                                                                            | <i>RGT2</i>      | Not described | No | No  |
| CAGL0L06248g | -              | 1,24 | - | Ortholog(s) have cytoplasm, nucleus localization                                                                                                                                                                                                                                                                                   | <i>YBR085C-A</i> | Not described | No | Yes |
| CAGL0J03256g | -              | 1,24 | - | Ortholog(s) have protein tyrosine phosphatase activity                                                                                                                                                                                                                                                                             | <i>PTP3</i>      | Not described | No | Yes |
| CAGL0K10604g | -              | 1,24 | - | Calmodulin-dependent protein kinase; may play a role in stress response, many Ca <sup>++</sup> /calmodulin dependent phosphorylation substrates demonstrated in vitro, amino acid sequence similar to Cmk2p and mammalian Cam Kinase II                                                                                            | <i>CMK1</i>      | Not described | No | Yes |
| CAGL0K01133g | -              | 1,23 | - | Ortholog(s) have actin monomer binding activity, role in sequestering of actin monomers and cell division site, cell tip, mating projection tip localization                                                                                                                                                                       | <i>TWF1</i>      | Not described | No | Yes |
| CAGL0K04257g | -              | 1,23 | - | Ortholog(s) have ATPase activity, coupled to transmembrane movement of ions, RNA polymerase II core promoter proximal region sequence-specific DNA binding, sequence-specific DNA binding RNA polymerase II transcription factor activity                                                                                          | <i>RME1</i>      | Not described | No | Yes |
| CAGL0D00990g | -              | 1,23 | - | Putative protein of unknown function; YDL057W is not an essential gene                                                                                                                                                                                                                                                             | <i>YDL057W</i>   | Not described | No | Yes |
| CAGL0H09614g | -              | 1,23 | - | Cell wall mannoprotein of the Srp1p/Tip1p family of serine-alanine-rich proteins; expression is downregulated at acidic pH and induced by cold shock and anaerobiosis; abundance is increased in cells cultured without shaking                                                                                                    | <i>TIR1</i>      | Not described | No | No  |
| CAGL0L09108g | -              | 1,22 | - | Ortholog(s) have role in propionate metabolic process and mitochondrial outer membrane localization                                                                                                                                                                                                                                | <i>PDH1</i>      | Yes           | No | No  |
| CAGL0E06666g | <i>CgEPA2</i>  | 1,22 | - | Epithelial adhesion protein; predicted GPI-anchor; adhesin-like protein                                                                                                                                                                                                                                                            | <i>FLO1</i>      | Yes           | -  | Yes |
| CAGL0H02695g | -              | 1,21 | - | Ortholog(s) have glycogenin glucosyltransferase activity and role in glycogen biosynthetic process                                                                                                                                                                                                                                 | <i>GLG1</i>      | Not described | No | Yes |
| CAGL0D01100g | -              | 1,21 | - | Ortholog(s) have 6-phosphofructo-2-kinase activity and role in fructose 2,6-bisphosphate metabolic process                                                                                                                                                                                                                         | <i>PFK26</i>     | Not described | No | No  |
| CAGL0H09592g | -              | 1,21 | - | Putative GPI-linked cell wall protein                                                                                                                                                                                                                                                                                              | -                | -             | -  | Yes |
| CAGL0F01947g | <i>CgIRC15</i> | 1,21 | - | Ortholog(s) have microtubule binding activity                                                                                                                                                                                                                                                                                      | <i>IRC15</i>     | Not described | No | No  |
| CAGL0I03476g | -              | 1,21 | - | Cytoplasmic DExD/H-box helicase, stimulates mRNA decapping; coordinates distinct steps in mRNA function and decay, interacts with both the decapping and deadenylase complexes, may have a role in mRNA export and translation; C-terminus of Dhh1p interacts with Ngr1p and promotes <i>POR1</i> , but not <i>EDC1</i> mRNA decay | <i>DHH1</i>      | Not described | No | Yes |
| CAGL0I08943g | -              | 1,21 | - | Poly(A) binding protein, suppressor of DNA polymerase epsilon mutation, similar to Mip6p                                                                                                                                                                                                                                           | <i>PES4</i>      | Not described | No | Yes |



|              |                  |      |   |                                                                                                                                                                                                                                                |                  |               |     |     |
|--------------|------------------|------|---|------------------------------------------------------------------------------------------------------------------------------------------------------------------------------------------------------------------------------------------------|------------------|---------------|-----|-----|
| CAGL0M09108g | -                | 1,20 | - | Has domain(s) with predicted RNA binding, nucleic acid binding, nucleotide binding activity                                                                                                                                                    | <i>PUF2</i>      | Not described | No  | Yes |
| CAGL0I01980g | -                | 1,20 | - | Putative activator of transcription; gene is upregulated in azole-resistant strain                                                                                                                                                             | <i>YSP1</i>      | Not described | Yes | Yes |
| CAGL0K12716g | -                | 1,20 | - | Has domain(s) with predicted substrate-specific transmembrane transporter activity, transmembrane transporter activity, role in transmembrane transport and integral to membrane, membrane localization                                        | <i>YFL040W</i>   | Not described | No  | No  |
| CAGL0H01177g | -                | 1,20 | - | Ortholog(s) have diacylglycerol diphosphate phosphatase activity, phosphatidate phosphatase activity and role in farnesol biosynthetic process, phospholipid metabolic process                                                                 | <i>DPP1</i>      | Not described | No  | Yes |
| CAGL0L06358g |                  | 1,20 |   | Vacuolar membrane protein of unknown function that is conserved in mammals; predicted to contain eleven transmembrane helices; interacts with Pdr5p, a protein involved in multidrug resistance                                                | <i>TMS1</i>      | Not described | No  | No  |
| CAGL0M05401g |                  | 1,20 |   | Putative protein of unknown function                                                                                                                                                                                                           | <i>YBR201C-A</i> | Not described | No  | Yes |
| CAGL0E01859g | <i>CgYPS10</i>   | 1,19 | - | Putative aspartic protease; predicted GPI-anchor; member of a YPS gene cluster that is required for virulence in mice; induced in response to low pH and high temperature                                                                      | -                | -             | -   | Yes |
| CAGL0L12056g | <i>CgBMH1(A)</i> | 1,19 | - | No Description Available                                                                                                                                                                                                                       | <i>BMH1</i>      | Not described | No  | Yes |
| CAGL0K04675g | -                | 1,19 | - | Unknown                                                                                                                                                                                                                                        | -                | -             | -   | No  |
| CAGL0L10142g | <i>CgRSB1</i>    | 1,18 | - | Putative sphingolipid flippase; gene is upregulated in azole-resistant strain                                                                                                                                                                  | <i>RSB1</i>      | Not described | No  | Yes |
| CAGL0H01287g | -                | 1,18 | - | Ortholog(s) have mRNA 5'-UTR binding, translation repressor activity, nucleic acid binding activity                                                                                                                                            | <i>*SSD1</i>     | Not described | No  | Yes |
| CAGL0E01419g | <i>CgYPS2</i>    | 1,18 | - | Putative aspartic protease; predicted GPI-anchor; member of a YPS gene cluster that is required for virulence in mice; induced in response to low pH and high temperature                                                                      | <i>MCK7</i>      | -             | -   | Yes |
| CAGL0J01892g | <i>CgPANI</i>    | 1,17 | - | Ortholog(s) have protein binding, bridging activity and role in actin cortical patch assembly, axial cellular bud site selection, bipolar cellular bud site selection, endocytosis, unidimensional cell growth                                 | <i>*PANI</i>     | Not described | No  | Yes |
| CAGL0L09691g | -                | 1,17 | - | Ortholog(s) have RNA polymerase II core promoter proximal region sequence-specific DNA binding, more                                                                                                                                           | <i>PUT3</i>      | Not described | No  | Yes |
| CAGL0M08800g | <i>CgYAP6</i>    | 1,17 | - | bZIP domain-containing protein                                                                                                                                                                                                                 | <i>CIN5</i>      | Not described | No  | No  |
| CAGL0L06094g | <i>CgSTR3</i>    | 1,17 |   | Peroxisomal cystathionine beta-lyase, converts cystathionine into homocysteine; may be redox regulated by Gto1p                                                                                                                                | <i>STR3</i>      | Not described | No  | Yes |
| CAGL0M06457g |                  | 1,17 |   | Putative protein of unknown function; expression is reduced in a <i>gcr1</i> null mutant; GFP-fusion protein localizes to the vacuole; expression pattern and physical interactions suggest a possible role in ribosome biogenesis             | <i>GDT1</i>      | Not described | Yes | Yes |
| CAGL0E06380g | -                | 1,16 | - | Ortholog(s) have ATP-dependent NAD(P)H-hydrate dehydratase activity, role in nicotinamide nucleotide metabolic process and cytosol localization                                                                                                | <i>YKL151C</i>   | Yes           | No  | Yes |
| CAGL0K12760g | -                | 1,16 | - | Ortholog(s) have cytoplasm localization                                                                                                                                                                                                        | <i>YFL042C</i>   | Not described | No  | Yes |
| CAGL0C03850g |                  | 1,16 |   | Nuclear thiol peroxidase which functions as an alkyl-hydroperoxide reductase during post-diauxic growth                                                                                                                                        | <i>DOT5</i>      | Not described | Yes | No  |
| CAGL0E02255g |                  | 1,16 |   | Peripheral membrane protein of the plasma membrane that interacts with Mid2p; regulates the cell integrity pathway mediated by Pkc1p and Slr2p; the authentic protein is detected in a phosphorylated state in highly purified mitochondria    | <i>ZEO1</i>      | Not described | No  | No  |
| CAGL0G05093g | -                | 1,15 | - | Ortholog(s) have mitochondrion localization                                                                                                                                                                                                    | <i>YDR061W</i>   | Not described | No  | No  |
| CAGL0C05137g | <i>CgGPD2</i>    | 1,15 |   | NAD-dependent glycerol 3-phosphate dehydrogenase, homolog of Gpd1p, expression is controlled by an oxygen-independent signaling pathway required to regulate metabolism under anoxic conditions; located in cytosol and mitochondria           | <i>GPD2</i>      | Not described | No  | Yes |
| CAGL0H02497g |                  | 1,15 |   | Coiled-coiled protein of unknown function, identified as a high-copy suppressor of a <i>dbp5</i> mutation                                                                                                                                      | <i>GFD1</i>      | Not described | No  | Yes |
| CAGL0L08140g |                  | 1,15 |   | PProtein homologous to human Chediak-Higashi syndrome and murine Beige proteins, which are implicated in disease syndromes due to defective lysosomal trafficking; mutant phenotype and genetic interactions suggest a role in protein sorting | <i>BPH1</i>      | Not described | Yes | Yes |
| CAGL0I03168g | -                | 1,14 | - | No Description Available                                                                                                                                                                                                                       | <i>YEL023C</i>   | Not described | No  | No  |
| CAGL0D01474g | -                | 1,14 | - | Ortholog(s) have role in actin cortical patch assembly and actin cortical patch, membrane raft localization                                                                                                                                    | <i>AIM3</i>      | Not described | No  | No  |

|              |               |      |   |                                                                                                                                                                                                                                              |                |               |     |     |
|--------------|---------------|------|---|----------------------------------------------------------------------------------------------------------------------------------------------------------------------------------------------------------------------------------------------|----------------|---------------|-----|-----|
| CAGL0A00539g | -             | 1,13 | - | Ortholog(s) have role in CVT pathway, intra-Golgi vesicle-mediated transport and Golgi transport complex, mitochondrion localization                                                                                                         | <i>COG7</i>    | Not described | No  | No  |
| CAGL0I07887g | -             | 1,13 | - | Ortholog(s) have protein binding, bridging activity and role in CVT pathway, ER-associated protein catabolic process, protein complex localization, protein processing, vesicle organization                                                 | <i>ATG19</i>   | Not described | No  | No  |
| CAGL0C01243g |               | 1,13 |   | Histidinol-phosphate aminotransferase, catalyzes the seventh step in histidine biosynthesis; responsive to general control of amino acid biosynthesis; mutations cause histidine auxotrophy and sensitivity to Cu, Co, and Ni salts          | <i>HIS5</i>    | Not described | No  | Yes |
| CAGL0C01243g |               | 1,13 |   | Histidinol-phosphate aminotransferase, catalyzes the seventh step in histidine biosynthesis; responsive to general control of amino acid biosynthesis; mutations cause histidine auxotrophy and sensitivity to Cu, Co, and Ni salts          | <i>HIS5</i>    | Not described | No  | Yes |
| CAGL0D00286g | <i>CgBMT1</i> | 1,12 | - | Beta mannosyltransferase                                                                                                                                                                                                                     | -              | -             | -   | No  |
| CAGL0C04939g |               | 1,12 |   | Putative protein of unknown function; has sequence or structural similarity to lipases                                                                                                                                                       | <i>YJR107W</i> | Not described | No  | No  |
| CAGL0I02046g |               | 1,12 |   | Unknown                                                                                                                                                                                                                                      | -              | Not described | -   | No  |
| CAGL0L00957g | -             | 1,11 | - | No Description Available                                                                                                                                                                                                                     | <i>CAJ1</i>    | Not described | No  | Yes |
| CAGL0H09218g | <i>CgSDT1</i> | 1,11 |   | Pyrimidine nucleotidase; overexpression suppresses the 6-AU sensitivity of transcription elongation factor S-II, as well as resistance to other pyrimidine derivatives                                                                       | <i>SDT1</i>    | Not described | No  | Yes |
| CAGL0M02629g |               | 1,11 |   | Conserved protein of the mitochondrial matrix, performs a scaffolding function during assembly of iron-sulfur clusters, interacts physically and functionally with yeast frataxin (Yfh1p); isu1 isu2 double mutant is inviable               | <i>ISU1</i>    | Not described | No  | Yes |
| CAGL0M00550g | -             | 1,10 | - | Ortholog(s) have cytosol, nucleus localization                                                                                                                                                                                               | <i>STR2</i>    | Not described | No  | No  |
| CAGL0C02519g | -             | 1,10 | - | Has domain(s) with predicted nucleic acid binding activity                                                                                                                                                                                   | <i>MIG3</i>    | Not described | No  | Yes |
| CAGL0L07810g | -             | 1,10 | - | Ortholog(s) have protein kinase activity                                                                                                                                                                                                     | <i>SAT4</i>    | Not described | No  | No  |
| CAGL0H03311g |               | 1,10 |   | Putative protein of unknown function; non-essential gene; interacts genetically with CHS5, a gene involved in chitin biosynthesis                                                                                                            | <i>YGL081W</i> | Not described | No  | Yes |
| CAGL0J03916g |               | 1,10 |   | Protein implicated in the regulation of ergosterol biosynthesis; one of a seven member gene family with a common essential function and non-essential unique functions; similar to human oxysterol binding protein (OSBP)                    | <i>HES1</i>    | Not described | No  | Yes |
| CAGL0K10736g | <i>CgCYB2</i> | 1,10 |   | Cytochrome b2 (L-lactate cytochrome-c oxidoreductase), component of the mitochondrial intermembrane space, required for lactate utilization; expression is repressed by glucose and anaerobic conditions                                     | <i>CYB2</i>    | Not described | No  | No  |
| CAGL0G02893g | -             | 1,09 | - | Ortholog(s) have NADH kinase activity, role in NADP biosynthetic process, cellular response to oxidative stress and mitochondrial matrix localization                                                                                        | <i>POS5</i>    | Not described | Yes | No  |
| CAGL0E02035g | -             | 1,09 | - | Ortholog(s) have fungal-type vacuole membrane localization                                                                                                                                                                                   | <i>MCH4</i>    | Yes           | No  | Yes |
| CAGL0L11440g | -             | 1,09 | - | Ortholog(s) have lipid binding activity and role in endoplasmic reticulum membrane organization, regulation of phosphatidylinositol dephosphorylation                                                                                        | <i>TCB3</i>    | Not described | No  | No  |
| CAGL0I01496g |               | 1,09 |   | Hsp70 family ATPase, constituent of the import motor component of the Translocase of the Inner Mitochondrial membrane (TIM23 complex); involved in protein translocation and folding; subunit of Sef1 endonuclease                           | <i>SSC1</i>    | Not described | No  | Yes |
| CAGL0K09790g |               | 1,09 |   | CAP (cyclase-associated protein) subunit of adenyl cyclase complex; N-terminus binds adenyl cyclase and facilitates activation by RAS; C-terminus binds ADP-actin monomers, facilitating regulation of actin dynamics and cell morphogenesis | <i>SRV2</i>    | Not described | No  | Yes |
| CAGL0L02607g |               | 1,09 |   | Putative protein of unknown function; green fluorescent protein (GFP)-fusion protein localizes to the vacuole, while HA-tagged protein is found in the soluble fraction, suggesting cytoplasmic localization                                 | <i>YHR202W</i> | Not described | No  | No  |
| CAGL0M08552g | -             | 1,08 | - | Ortholog(s) have role in cation transport, regulation of membrane potential and plasma membrane localization                                                                                                                                 | <i>PMP3</i>    | Yes           | No  | Yes |
| CAGL0G01738g | -             | 1,08 | - | Ortholog(s) have lipid binding activity and role in eisosome assembly, endocytosis, negative regulation of protein kinase activity, protein localization, response to heat                                                                   | <i>PIL1</i>    | Not described | No  | Yes |

|              |        |      |   |                                                                                                                                                                                                                                                                                                                                                                                                                                                                      |                |               |     |     |
|--------------|--------|------|---|----------------------------------------------------------------------------------------------------------------------------------------------------------------------------------------------------------------------------------------------------------------------------------------------------------------------------------------------------------------------------------------------------------------------------------------------------------------------|----------------|---------------|-----|-----|
| CAGL0A00517g | -      | 1,08 | - | Vacuolar Ca <sup>2+</sup> ATPase involved in depleting cytosol of Ca <sup>2+</sup> ions; prevents growth inhibition by activation of calcineurin in the presence of elevated concentrations of calcium; similar to mammalian PMCA1a                                                                                                                                                                                                                                  | <i>PMCI</i>    | Not described | No  | Yes |
| CAGL0G08646g |        | 1,08 |   | Nuclear chromatin-associated protein of unknown function; overexpression promotes recovery from pheromone induced arrest and suppresses the stress sensitivity caused by a mutation in the E3 ubiquitin ligase Rsp5p; binds upstream of BAR1 and cell cycle-related genes; potential Cdc28p substrate; SBF regulated                                                                                                                                                 | <i>POG1</i>    | Not described | No  | No  |
| CAGL0K05687g |        | 1,08 |   | Ubiquitin-specific protease involved in protein deubiquitination; catalytic activity regulated by an N-terminal TRAF-like domain and and C-terminal sequences; physically interacts with anaphase-promoting complex/cyclosome (APC/C) activator, Cdh1p                                                                                                                                                                                                               | <i>UBP15</i>   | Not described | Yes | No  |
| CAGL0M13783g |        | 1,08 |   | Ortholog(s) have Golgi apparatus, endoplasmic reticulum, fungal-type vacuole membrane localization                                                                                                                                                                                                                                                                                                                                                                   | <i>YGR125W</i> | Not described | No  | No  |
| CAGL0F01419g | CgAUS1 | 1,07 |   | Plasma membrane sterol transporter of the ATP-binding cassette family; required, along with Pdr11p, for uptake of exogenous sterols and their incorporation into the plasma membrane; activity is stimulated by phosphatidylserine; sterol uptake is required for anaerobic growth because sterol biosynthesis requires oxygen                                                                                                                                       | <i>AUS1</i>    | Not described | No  | Yes |
| CAGL0J09416g |        | 1,07 |   | Protein of unknown function, localized to the vacuolar outer membrane; predicted to be palmitoylated                                                                                                                                                                                                                                                                                                                                                                 | <i>SNA4</i>    | Not described | No  | Yes |
| CAGL0M08602g |        | 1,07 |   | Cu(+2)-transporting P-type ATPase, required for export of copper from the cytosol into an extracytosolic compartment; has similarity to human proteins involved in Menkes and Wilsons diseases                                                                                                                                                                                                                                                                       | <i>CCC2</i>    | Not described | No  | No  |
| CAGL0M07568g | -      | 1,06 | - | Ortholog(s) have ubiquitin-protein ligase activity                                                                                                                                                                                                                                                                                                                                                                                                                   | <i>UBC7</i>    | Not described | No  | No  |
| CAGL0K04367g | -      | 1,06 | - | Has domain(s) with predicted amino acid transmembrane transporter activity, role in amino acid transmembrane transport and membrane localization                                                                                                                                                                                                                                                                                                                     | <i>MUPI</i>    | Not described | No  | Yes |
| CAGL0C03509g |        | 1,06 |   | Ser/Thr protein kinase that regulates the putative phospholipid translocases Lem3p-Dnf1p/Dnf2p; phosphorylates and inhibits upstream inhibitory kinase, Ypk1p; localizes to the cytoplasm, early endosome/TGN compartments, and plasma membrane                                                                                                                                                                                                                      | <i>FPK1</i>    | Not described | Yes | Yes |
| CAGL0I02552g |        | 1,06 |   | Transcription factor, involved in regulating multidrug resistance and oxidative stress response; forms a heterodimer with Pdr1p; contains a Zn(II)2Cys6 zinc finger domain that interacts with a pleiotropic drug resistance element in vitro                                                                                                                                                                                                                        | <i>STB5</i>    | Not described | Yes | Yes |
| CAGL0L08712g | -      | 1,05 | - | Ortholog(s) have cytoplasm, nucleus localization                                                                                                                                                                                                                                                                                                                                                                                                                     | <i>YPL014W</i> | Yes           | No  | Yes |
| CAGL0F06831g |        | 1,05 |   | ER membrane protein involved in regulation of OLE1 transcription, acts with homolog Spt23p; inactive ER form dimerizes and one subunit is then activated by ubiquitin/proteasome-dependent processing followed by nuclear targeting                                                                                                                                                                                                                                  | <i>MG42</i>    | Not described | No  | No  |
| CAGL0M10549g |        | 1,05 |   | Cytochrome c oxidase subunit; has a role in assembly of respiratory supercomplexes; similar to Rcf1p, and either Rcf1p or Rcf2p is required for late-stage assembly of the Cox12p and Cox13p subunits and for cytochrome c oxidase activity; associates with the cytochrome c oxidase - cytochrome bc1 supercomplex; null mutant accumulates reactive oxygen species; member of the conserved hypoxia induced gene family; C. elegans homolog is functional in yeast | <i>RCF2</i>    | Not described | No  | Yes |
| CAGL0M13365g |        | 1,05 |   | Protein involved in the control of meiotic nuclear division and coordination of meiosis with spore formation; transcription is induced midway through meiosis                                                                                                                                                                                                                                                                                                        | <i>SSP1</i>    | Not described | No  | No  |
| CAGL0A02024g |        | 1,04 |   | Protein that negatively regulates the SCF E3-ubiquitin ligase by interacting with and preventing neddylation of the cullin subunit, Cdc53p; longevity determinant that is preferentially expressed in young cells; similar to mammalian Candi                                                                                                                                                                                                                        | <i>LAG2</i>    | Yes           | No  | No  |

|              |         |      |   |                                                                                                                                                                                                                                           |                  |               |     |     |
|--------------|---------|------|---|-------------------------------------------------------------------------------------------------------------------------------------------------------------------------------------------------------------------------------------------|------------------|---------------|-----|-----|
| CAGL0B00242g |         | 1,04 |   | Silenced copy of ALPHA1 at HML, encoding a transcriptional coactivator involved in the regulation of mating-type alpha-specific gene expression                                                                                           | <i>HMLALPHA1</i> | Not described | No  | Yes |
| CAGL0F02387g | CgPHO87 | 1,04 |   | Low-affinity phosphate transporter; deletion of pho84, pho87, pho89, pho90, and pho91 causes synthetic lethality; transcription independent of Pi and Pho4p activity; overexpression results in vigorous growth                           | <i>PHO90</i>     | Not described | No  | Yes |
| CAGL0F07777g |         | 1,04 |   | Cytoplasmic aldehyde dehydrogenase, involved in beta-alanine synthesis; uses NAD+ as the preferred coenzyme; very similar to Ald2p; expression is induced by stress and repressed by glucose                                              | <i>ALD3</i>      | Not described | No  | No  |
| CAGL0K12694g |         | 1,04 |   | Actin, structural protein involved in cell polarization, endocytosis, and other cytoskeletal functions                                                                                                                                    | <i>ACT1</i>      | Not described | No  | No  |
| CAGL0L00649g |         | 1,04 |   | Acetyl-coA synthetase isoform which, along with Acs2p, is the nuclear source of acetyl-coA for histone acetylation; expressed during growth on nonfermentable carbon sources and under aerobic conditions                                 | <i>ACSI</i>      | Not described | No  | Yes |
| CAGL0D02134g |         | 1,03 |   | Putative protein of unknown function; has similarity to Mgr3p, but unlike MGR3, is not required for growth of cells lacking the mitochondrial genome (null mutation does not confer a petite-negative phenotype)                          | <i>YKL133C</i>   | Not described | No  | Yes |
| CAGL0E00891g |         | 1,03 |   | Ribosomal RNA processing element (RRPE)-binding protein involved in the glucose-induced transition from quiescence to growth; restricted to nucleus in quiescent cells, released into cytoplasm after glucose repletion; binds Sin3p      | <i>STB3</i>      | Not described | No  | No  |
| CAGL0I03960g | CgVMA1  | 1,03 |   | Subunit A of the eight-subunit V1 peripheral membrane domain of the vacuolar H+-ATPase; protein precursor undergoes self-catalyzed splicing to yield the extein Tfp1p and the intein Vde (PI-SceI), which is a site-specific endonuclease | <i>VMA1</i>      | Not described | No  | Yes |
| CAGL0K04477g |         | 1,03 |   | C-4 methyl sterol oxidase, catalyzes the first of three steps required to remove two C-4 methyl groups from an intermediate in ergosterol biosynthesis; mutants accumulate the sterol intermediate 4,4-dimethylzymosterol                 | <i>ERG25</i>     | Not described | No  | No  |
| CAGL0M11484g |         | 1,03 |   | Pentafunctional arom protein, catalyzes steps 2 through 6 in the biosynthesis of chorismate, which is a precursor to aromatic amino acids                                                                                                 | <i>ARO1</i>      | Not described | Yes | Yes |
| CAGL0J01529g | -       | 1,02 | - | Ortholog(s) have role in histone deacetylation, negative regulation of antisense RNA transcription, regulation of DNA-dependent DNA replication initiation, transcription elongation from RNA polymerase II promoter                      | <i>RCO1</i>      | Not described | No  | No  |
| CAGL0A03344g |         | 1,02 |   | Putative integral membrane E3 ubiquitin ligase; acts with Asi1p and Asi2p to ensure the fidelity of SPS-sensor signalling by maintaining the dormant repressed state of gene expression in the absence of inducing signals                | <i>ASI3</i>      | Not described | No  | Yes |
| CAGL0I10054g |         | 1,02 |   | Protein involved in sphingolipid biosynthesis; type II membrane protein with similarity to Kre6p                                                                                                                                          | <i>SKNI</i>      | Not described | No  | Yes |
| CAGL0L08338g |         | 1,02 |   | Minor isoform of tropomyosin, binds to and stabilizes actin cables and filaments, which direct polarized cell growth and the distribution of several organelles; appears to have distinct and also overlapping functions with Tpm1p       | <i>TPM2</i>      | Not described | No  | Yes |
| CAGL0J08349g |         | 1,01 |   | Part of the evolutionarily-conserved CCR4-NOT transcriptional regulatory complex involved in controlling mRNA initiation, elongation, and degradation                                                                                     | <i>CAF120</i>    | Not described | No  | No  |
| CAGL0L03982g |         | 1,01 |   | Malate synthase, enzyme of the glyoxylate cycle, involved in utilization of non-fermentable carbon sources; expression is subject to carbon catabolite repression; localizes in peroxisomes during growth in oleic acid medium            | <i>MLS1</i>      | Not described | No  | Yes |
| CAGL0D06512g |         | 1,00 |   |                                                                                                                                                                                                                                           | <i>SDC25</i>     | Not described | No  | Yes |
| CAGL0F01287g | CgGAS5  | 1,00 |   | 1,3-beta-glucanoyltransferase, has similarity to Gas1p; localizes to the cell wall                                                                                                                                                        | <i>GAS5</i>      | Not described | No  | Yes |
| CAGL0K04873g |         | 1,00 |   | Putative protein of unknown function; green fluorescent protein (GFP)-fusion protein localizes to the cytoplasm and nucleus; YDL233W is not an essential gene                                                                             | <i>YDL233W</i>   | Not described | No  | Yes |

Genes whose acetic acid-induced transcriptional activation was partly dependent of CgHaa1

| ORF          | <i>C. glabrata</i> gene |      |      | Function                                                                                                                                                                                                                                                                    | <i>S. cerevisiae</i> orthologue | <i>S. cerevisiae</i> orthologue regulated by ScHaa1? | <i>S. cerevisiae</i> homologue confers resistance to acetic acid? | <i>C. glabrata</i> promoter harbors an HRE motif |
|--------------|-------------------------|------|------|-----------------------------------------------------------------------------------------------------------------------------------------------------------------------------------------------------------------------------------------------------------------------------|---------------------------------|------------------------------------------------------|-------------------------------------------------------------------|--------------------------------------------------|
| CAGL0I06182g | <i>CgPIR2</i>           | 7,65 | 3,10 | O-mannosylated heat shock protein that is secreted and covalently attached to the cell wall via beta-1,3-glucan and disulfide bridges; required for cell wall stability; induced by heat shock, oxidative stress, and nitrogen limitation                                   | <i>HSP150</i>                   | Not described                                        | No                                                                | Yes                                              |
| CAGL0G05632g | -                       | 6,95 | 1,41 | Ortholog(s) have cytoplasm localization                                                                                                                                                                                                                                     | <i>YDL218W</i>                  | Not described                                        | No                                                                | No                                               |
| CAGL0I10010g | -                       | 6,82 | 3,66 | v-SNARE binding protein that facilitates specific protein retrieval from a late endosome to the Golgi; modulates arginine uptake, possible role in mediating pH homeostasis between the vacuole and plasma membrane H(+)-ATPase                                             | <i>BTN2</i>                     | Not described                                        | No                                                                | Yes                                              |
| CAGL0M01166g | -                       | 6,44 | 4,20 | Ortholog(s) have ferrous iron binding activity, role in mitochondrial genome maintenance, thiamine biosynthetic process, thiazole biosynthetic process and cytosol, nucleus localization                                                                                    | <i>TH4</i>                      | Not described                                        | No                                                                | No                                               |
| CAGL0F08261g | -                       | 6,11 | 2,55 | Ortholog(s) have phosphopyruvate hydratase activity, role in glycolysis, regulation of vacuole fusion, non-autophagic and fungal-type vacuole, internal side of plasma membrane, mitochondrion, phosphopyruvate hydratase complex localization                              | <i>ENO1</i>                     | Not described                                        |                                                                   | No                                               |
| CAGL0G03883g | -                       | 6,10 | 4,05 | Disaggregase; Heat shock protein that cooperates with Ydj1p (Hsp40) and Ssa1p (Hsp70) to refold and reactivate previously denatured, aggregated proteins; responsive to stresses including: heat, ethanol, and sodium arsenite; involved in [PSI <sup>+</sup> ] propagation | <i>HSP104</i>                   | Yes                                                  |                                                                   | No                                               |
| CAGL0G03289g | <i>CgSSA3</i>           | 6,10 | 2,09 | Heat shock protein of the HSP70 family                                                                                                                                                                                                                                      | <i>SSA4</i>                     | Yes                                                  | Yes                                                               | No                                               |
| CAGL0J00451g | -                       | 5,66 | 4,38 | Putative glyceraldehyde-3-phosphate dehydrogenase; protein differentially expressed in azole resistant strain; expression downregulated in biofilm vs planktonic cell culture                                                                                               | <i>TDH3</i>                     | Not described                                        | No                                                                | No                                               |
| CAGL0M08822g | <i>CgHSP78</i>          | 5,06 | 3,34 | Ortholog(s) have ATPase activity, misfolded protein binding activity                                                                                                                                                                                                        | <i>HSP78</i>                    | Not described                                        | No                                                                | Yes                                              |
| CAGL0E00803g | -                       | 4,82 | 2,88 | Putative small cytosolic stress-induced chaperone; gene is upregulated in azole-resistant strain                                                                                                                                                                            | <i>HSP42</i>                    | Yes                                                  | No                                                                | Yes                                              |
| CAGL0H03707g | -                       | 4,64 | 2,57 | Ortholog(s) have role in protein folding, translational initiation and cytosolic small ribosomal subunit, nucleus localization                                                                                                                                              | <i>*SIS1</i>                    | Not described                                        | No                                                                | Yes                                              |
| CAGL0G08866g | -                       | 4,38 | 1,96 | Ortholog(s) have RNA polymerase II transcription factor binding, RNA polymerase II transcription factor binding transcription factor activity, sequence-specific DNA binding activity                                                                                       | <i>FKH2</i>                     | Yes                                                  | No                                                                | Yes                                              |
| CAGL0C02321g | <i>CgPHM8</i>           | 4,25 | 2,36 | Ortholog(s) have nucleotidase activity and role in pyrimidine nucleobase metabolic process                                                                                                                                                                                  | <i>SDT1</i>                     | Not described                                        | No                                                                | Yes                                              |
| CAGL0K10164g | -                       | 4,08 | 2,54 | Predicted GPI-linked protein; putative adhesin-like protein                                                                                                                                                                                                                 | <i>SPI1</i>                     | Yes                                                  | No                                                                | Yes                                              |
| CAGL0I09724g | -                       | 4,07 | 2,05 | Unknown                                                                                                                                                                                                                                                                     | -                               | -                                                    | No                                                                | Yes                                              |
| CAGL0F04631g | -                       | 4,03 | 1,84 | No Description Available                                                                                                                                                                                                                                                    | <i>MOH1</i>                     | Not described                                        | No                                                                | Yes                                              |
| CAGL0F04631g | -                       | 4,03 | 1,84 | Protein of unknown function, has homology to kinase Snf7p; not required for growth on nonfermentable carbon sources; essential for survival in stationary phase                                                                                                             | <i>MOH1</i>                     | Not described                                        | No                                                                | Yes                                              |
| CAGL0I10384g | <i>CgTPO3</i>           | 3,98 | 1,49 | Predicted polyamine transporter of the major facilitator superfamily; required for azole resistance                                                                                                                                                                         | <i>TPO3</i>                     | Yes                                                  | Yes                                                               | No                                               |
| CAGL0J06050g | -                       | 3,97 | 1,41 | Has domain(s) with predicted role in cellular amino acid metabolic process                                                                                                                                                                                                  | <i>YGP1</i>                     | Yes                                                  | No                                                                | Yes                                              |
| CAGL0H00704g | -                       | 3,95 | 2,86 | Protein of unknown function; mobilized into polysomes upon a shift from a fermentable to nonfermentable carbon source; potential Cdc28p substrate                                                                                                                           | <i>ICY2</i>                     | Not described                                        | Yes                                                               | Yes                                              |
| CAGL0G08624g | <i>CgQDR2</i>           | 3,92 | 2,69 | Drug:H <sup>+</sup> antiporter of the Major Facilitator Superfamily, confers imidazole drug resistance, involved in quinidine/multidrug efflux; gene is activated by Pdr1p; upregulated in azole-resistant strain                                                           | <i>QDR1</i>                     | Not described                                        | No                                                                | Yes                                              |
| CAGL0F04521g | -                       | 3,84 | 1,19 | No Description Available                                                                                                                                                                                                                                                    | <i>ECM13</i>                    | Yes                                                  | No                                                                | Yes                                              |
| CAGL0L07722g | <i>CgPGK1</i>           | 3,69 | 2,34 | Putative 3-phosphoglycerate kinase; protein differentially expressed in azole resistant strain; protein abundance increased in ace2 mutant cells                                                                                                                            | <i>*PGK1</i>                    | Not described                                        | No                                                                | Yes                                              |
| CAGL0H04279g | <i>CgMT-IIB</i>         | 3,65 | 2,73 | Copper-binding metallothionein, involved in sequestration of metal ions; inducible by copper and silver; present in multiple (3-9) tandemly arranged copies in various strains                                                                                              | -                               | -                                                    | -                                                                 | Yes                                              |
| CAGL0F04895g | -                       | 3,61 | 1,45 | Ortholog(s) have glycogen phosphorylase activity, role in glycogen catabolic process and cell surface, cytoplasm, hyphal cell wall localization                                                                                                                             | <i>GPH1</i>                     | Not described                                        | No                                                                | Yes                                              |
| CAGL0K12254g | -                       | 3,60 | 2,71 | Peripheral membrane protein located at Vid (vacuole import and degradation) vesicles; regulates fructose-1,6-bisphosphatase (FBPase) targeting to the vacuole; promotes proteasome-dependent catabolite degradation of FBPase                                               | <i>VID24</i>                    | Not described                                        | No                                                                | No                                               |
| CAGL0K04301g | -                       | 3,47 | 1,45 | Putative mitochondrial Ser/Thr protein kinase; gene is upregulated in azole-resistant strain                                                                                                                                                                                | <i>FMP48</i>                    | Yes                                                  | Yes                                                               | No                                               |

7,36

|              |                |      |      |                                                                                                                                                                                                                                                                                                |                  |               |     |     |
|--------------|----------------|------|------|------------------------------------------------------------------------------------------------------------------------------------------------------------------------------------------------------------------------------------------------------------------------------------------------|------------------|---------------|-----|-----|
| CAGL0E06358g | <i>CgGPM1</i>  | 3,46 | 2,58 | Tetrameric phosphoglycerate mutase, mediates the conversion of 3-phosphoglycerate to 2-phosphoglycerate during glycolysis and the reverse reaction during gluconeogenesis                                                                                                                      | <i>GPM1</i>      | Not described | No  | No  |
| CAGL0H02101g | -              | 3,31 | 1,95 | Ortholog(s) have role in RNA metabolic process and cytoplasm, nucleus localization                                                                                                                                                                                                             | <i>RTC3</i>      | Yes           | No  | Yes |
| CAGL0J10296g | -              | 3,30 | 1,40 | Ortholog(s) have ATPase activator activity, unfolded protein binding activity, role in protein sumoylation and mitochondrion, nucleus localization                                                                                                                                             | <i>APJ1</i>      | Not described | No  | Yes |
| CAGL0F08745g | -              | 3,22 | 1,70 | Protein involved in resistance to desiccation stress; Stf2p exhibits antioxidant properties, and its overexpression prevents ROS accumulation and apoptosis; binds to the F0 sector of mitochondrial F1F0 ATPase in vitro and is proposed to modulate the inhibitory action of Inh1p and Stf1p | <i>STF2</i>      | Yes           | No  | Yes |
| CAGL0M02167g | -              | 3,22 | 1,83 | Pheromone-regulated protein proposed to be involved in mating; predicted to have 1 transmembrane segment; transcriptionally regulated by Ste12p during mating and by Cat8p during the diauxic shift                                                                                            | <i>PRM4</i>      | Not described | No  | Yes |
| CAGL0A03102g | <i>CgARO10</i> | 3,17 | 1,66 | Phenylpyruvate decarboxylase, catalyzes decarboxylation of phenylpyruvate to phenylacetaldehyde, which is the first specific step in the Ehrlich pathway                                                                                                                                       | <i>ARO10</i>     | Not described | No  | Yes |
| CAGL0H00418g | -              | 3,16 | 1,26 | Unknown                                                                                                                                                                                                                                                                                        | -                | -             | -   | Yes |
| CAGL0K04719g | -              | 3,15 | 1,09 | Ortholog(s) have mitochondrion, ribosome localization                                                                                                                                                                                                                                          | <i>YNL208W</i>   | Not described | No  | No  |
| CAGL0I00418g | -              | 3,15 | 2,00 | Ortholog(s) have electron carrier activity, stearyl-CoA 9-desaturase activity                                                                                                                                                                                                                  | <i>*OLE1</i>     | Not described | No  | No  |
| CAGL0G03795g | <i>CgSSA1</i>  | 3,13 | 1,84 | Heat shock protein of the HSP70 family                                                                                                                                                                                                                                                         | <i>SSA2</i>      | Not described | No  | Yes |
| CAGL0I05934g | -              | 3,12 | 1,95 | Ortholog(s) have role in cellular response to water deprivation and cytoplasm localization                                                                                                                                                                                                     | <i>YJL144W</i>   | Not described | No  | Yes |
| CAGL0E05566g | -              | 3,11 | 1,41 | Serine-rich protein that contains a basic-helix-loop-helix (bHLH) DNA binding motif; binds E-boxes of glycolytic genes and contributes to their activation; may function as a transcriptional activator in Tyl1-mediated gene expression                                                       | <i>TYE7</i>      | Yes           | No  | No  |
| CAGL0F01111g | -              | 3,09 | 1,88 | Protein with a possible role in phospholipid biosynthesis, based on inositol-excreting phenotype of the null mutant and its suppression by exogenous choline                                                                                                                                   | <i>OP110</i>     | Not described | No  | Yes |
| CAGL0I02486g | -              | 3,06 | 2,14 | Enolase II, a phosphopyruvate hydratase that catalyzes the conversion of 2-phosphoglycerate to phosphoenolpyruvate during glycolysis and the reverse reaction during gluconeogenesis; expression is induced in response to glucose                                                             | <i>ENO2</i>      | Not described | No  | Yes |
| CAGL0M13651g | -              | 3,04 | 1,62 | Ortholog(s) have serine-type carboxypeptidase activity, role in phytochelatin biosynthetic process and endoplasmic reticulum, fungal-type vacuole localization                                                                                                                                 | <i>PRC1</i>      | Not described | No  | No  |
| CAGL0J04466g | -              | 3,04 | 1,68 | Plasma membrane protein with a role in cell wall integrity; co-localizes with Sur7p in punctate membrane patches; null mutant displays decreased thermotolerance; transcription induced upon cell wall damage and metal ion stress                                                             | <i>PUN1</i>      | Not described | No  | No  |
| CAGL0C00275g | -              | 3,04 | 1,01 | Putative cysteine protease                                                                                                                                                                                                                                                                     | -                | -             | -   | No  |
| CAGL0C02893g | -              | 3,01 | 1,22 | Ortholog(s) have protein serine/threonine kinase activity                                                                                                                                                                                                                                      | <i>HRK1</i>      | Yes           | Yes | Yes |
| CAGL0H03971g | -              | 2,98 | 1,82 | Ortholog(s) have membrane raft, mitochondrion, plasma membrane localization                                                                                                                                                                                                                    | <i>YCP4</i>      | Not described | No  | No  |
| CAGL0M08492g | <i>CgPIR3</i>  | 2,88 | 1,66 | Pir protein family member, predicted GPI-anchor                                                                                                                                                                                                                                                | <i>PIR1</i>      | Not described | No  | Yes |
| CAGL0L02497g | <i>CgFBA1</i>  | 2,84 | 1,59 | Fructose-bisphosphate aldolase; expression downregulated in biofilm vs planktonic cell culture; protein abundance increased in ace2 mutant cells                                                                                                                                               | <i>*FBA1</i>     | Not described | No  | Yes |
| CAGL0L06424g | -              | 2,77 | 1,42 |                                                                                                                                                                                                                                                                                                | <i>YDR134C</i>   | Yes           |     | Yes |
| CAGL0H08393g | -              | 2,75 | 1,55 | Has domain(s) with predicted amino acid transmembrane transporter activity, role in amino acid transmembrane transport, amino acid transport, transmembrane transport and integral to membrane, membrane localization                                                                          | <i>BAP3</i>      | Not described | No  | Yes |
| CAGL0M12034g | <i>CgPYK1</i>  | 2,72 | 1,75 | Pyruvate kinase, functions as a homotetramer in glycolysis to convert phosphoenolpyruvate to pyruvate, the input for aerobic (TCA cycle) or anaerobic (glucose fermentation) respiration                                                                                                       | <i>CDC19</i>     | Not described | No  | No  |
| CAGL0K07634g | <i>CgGAT1</i>  | 2,65 | 1,07 | Ortholog(s) have RNA polymerase II core promoter proximal region sequence-specific DNA binding transcription factor activity involved in positive regulation of transcription, more                                                                                                            | <i>GAT1</i>      | Not described | No  | No  |
| CAGL0I01342g | -              | 2,63 | 1,00 | Ortholog(s) have L-allo-threonine aldolase activity, role in carnitine biosynthetic process, glycine biosynthetic process, threonine catabolic process and cytosol, nucleus localization                                                                                                       | <i>GLY1</i>      | Not described | Yes | Yes |
| CAGL0E04774g | -              | 2,55 | 1,05 | Ortholog(s) have cytoplasm localization                                                                                                                                                                                                                                                        | <i>YDR222W</i>   | Not described | No  | Yes |
| CAGL0M11000g | -              | 2,50 | 1,10 | Putative protein of unknown function; expression is regulated by Msn2p/Msn4p                                                                                                                                                                                                                   | <i>YNR034W-A</i> | Yes           | No  | Yes |
| CAGL0G03531g | -              | 2,49 | 1,10 | No Description Available                                                                                                                                                                                                                                                                       | <i>SPR6</i>      | Not described | No  | No  |
| CAGL0H01375g | <i>CgSUR2</i>  | 2,44 | 1,34 | Predicted sphinganine hydroxylase with role in sphingolipid biosynthesis; mutants show reduced sensitivity to caspofungin and increased sensitivity to micafungin                                                                                                                              | <i>SUR2</i>      | Yes           | Yes | Yes |

|              |               |      |      |                                                                                                                                                                                                                                    |             |               |     |     |
|--------------|---------------|------|------|------------------------------------------------------------------------------------------------------------------------------------------------------------------------------------------------------------------------------------|-------------|---------------|-----|-----|
| CAGL0F08041g | <i>CgPFK1</i> | 2,43 | 1,23 | Putative phosphofructokinase, alpha subunit; increased protein abundance in azole resistant strain                                                                                                                                 | <i>PFK1</i> | Not described | Yes | No  |
| CAGL0G08844g |               | 2,35 | 1,16 | Zinc cluster protein proposed to function as a transcriptional regulator involved in the stress response; null mutants have a respiratory deficiency, calcofluor white sensitivity and slightly increased cycloheximide resistance | <i>ASG1</i> | Yes           | Yes | Yes |
| CAGL0F04917g | -             | 2,17 | 1,15 | Putative targeting subunit for the type-1 protein phosphatase Glc7p that tethers it to the Gsy2p glycogen synthase                                                                                                                 | <i>PIG1</i> | Not described | No  | Yes |
| CAGL0L11154g | -             | 2,14 | 1,13 | Ortholog(s) have carboxylesterase activity, lysophospholipase activity, role in phosphatidylcholine catabolic process, regulation of phospholipid biosynthetic process and endoplasmic reticulum localization                      | <i>NTE1</i> | Not described | No  | Yes |
| CAGL0G10219g | <i>AWP12</i>  | 2,11 | 1,02 | Adhesin-like protein with 5 tandem repeats                                                                                                                                                                                         | -           | -             | -   | Yes |
| CAGL0G02849g |               | 2,08 | 1,15 | Protein that interacts with Ulp1p, a Ubl (ubiquitin-like protein)-specific protease for Smt3p protein conjugates; detected in a phosphorylated state in the mitochondrial outer membrane; also detected in ER and nuclear envelope | <i>UIP4</i> | Not described | No  | Yes |
