# Supplementary material for: The CgHaa1-Regulon Mediates Response and Tolerance to Acetic Acid Stress in the Human Pathogen Candida glabrata
Source: PubMed Central journal article supplement (PMC5217100; doi:10.1534/g3.116.034660), 2016-11-04
Supplement: 1TableS4.pdf [file 1TableS4.pdf]

**Supplementary table S4** – Comparison of the ScHaa1- and CgHaa1- dependent regulatory networks. The dataset of *C. glabrata* genes herein found to be regulated by CgHaa1 under acetic acid stress was compared with the dataset of genes described to be regulated by ScHaa1, based on the information available at the YEASTRACT database. Identification of orthologues was performed using the Yeastmine algorithm available at the Candida Genome database website after which a manual curation of the data based on BLASTP was performed. The promoter region of *S. cerevisiae* or *C. glabrata* genes was searched for the described ScHaa1 binding site (5'-(G/C)(A/C)GG(G/C)-3', designated Haa1-responsive element – HRE; Mira et al., 2011) using the DNA pattern matching algorithms embedded in the RSA tools website. Cells highlighted in grey correspond to the *S. cerevisiae* genes found to be regulated by ScHaa1 specifically under acetic acid stress, based on the dataset of Mira et al., (2010).

### Acetic acid-responsive genes regulated by ScHaa1 only

| ORF          | Function                                                                                                                                                                                                                                | <i>S. cerevisiae</i><br>orthologue | <i>C. glabrata</i><br>promoter harbors<br>an HRE motif | <i>S. cerevisiae</i><br>promoter harbors<br>an HRE motif |
|--------------|-----------------------------------------------------------------------------------------------------------------------------------------------------------------------------------------------------------------------------------------|------------------------------------|--------------------------------------------------------|----------------------------------------------------------|
| CAGL0A00891g | Ortholog(s) have actin binding, cytoskeletal regulatory protein binding, enzyme activator activity                                                                                                                                      | YLR319C                            | No                                                     | No                                                       |
| CAGL0A00913g | Ortholog(s) have role in double-strand break repair, meiotic sister chromatid segregation, recombinational repair, replication fork processing and Cul8-RING ubiquitin ligase complex, nucleus localization                             | YLR320W                            | No                                                     | No                                                       |
| CAGL0A01001g | No Description Available                                                                                                                                                                                                                | YLR326W                            | Yes                                                    | No                                                       |
| CAGL0A01023g | Ortholog(s) have nicotinamide-nucleotide adenylyltransferase activity, role in NAD biosynthetic process and cytosol, nucleus localization                                                                                               | YLR328W                            | Yes                                                    | Yes                                                      |
| CAGL0A01111g | Ortholog(s) have proton-transporting ATP synthase activity, rotational mechanism activity, role in ATP synthesis coupled proton transport and mitochondrial proton-transporting ATP synthase, central stalk localization                | YPL271W                            | Yes                                                    | Yes                                                      |
| CAGL0A01540g | Ortholog(s) have pre-mRNA 5'-splice site binding, structural constituent of ribosome activity, role in negative regulation of mRNA splicing, via spliceosome, rRNA processing and cytosol localization                                  | YGL030W                            | No                                                     | No                                                       |
| CAGL0A01760g | Ortholog(s) have role in mitochondrial translation and mitochondrion localization                                                                                                                                                       | YDR341C                            | No                                                     | No                                                       |
| CAGL0A02024g | Ortholog(s) have role in negative regulation of ubiquitin-protein transferase activity, replicative cell aging and mitochondrion localization                                                                                           | YOL025W                            | No                                                     | No                                                       |
| CAGL0A02365g | Ortholog(s) have role in cellular response to oxidative stress and cytosol, nucleus localization                                                                                                                                        | YDR346C                            | No                                                     | No                                                       |
| CAGL0A02860g | Ortholog(s) have 5'-3' exonuclease activity, role in deadenylation-dependent decapping of nuclear-transcribed mRNA and cytoplasm localization                                                                                           | YDR370C                            | No                                                     | No                                                       |
| CAGL0A03168g | 60S acidic ribosomal protein                                                                                                                                                                                                            | YDR382W                            | No                                                     | No                                                       |
| CAGL0A03366g | Ortholog(s) have IMP cyclohydrolase activity, phosphoribosylaminoimidazolecarboxamide formyltransferase activity, role in 'de novo' IMP biosynthetic process and cytosol, plasma membrane localization                                  | YLR028C                            | Yes                                                    | No                                                       |
| CAGL0A03652g | Ortholog(s) have role in maturation of 5.8S rRNA from tricistronic rRNA transcript (SSU-rRNA, 5.8S rRNA, LSU-rRNA), maturation of LSU-rRNA from tricistronic rRNA transcript (SSU-rRNA, 5.8S rRNA, LSU-rRNA) and nucleolus localization | YBR142W                            | No                                                     | No                                                       |
| CAGL0A04081g | Predicted GPI-linked cell wall protein                                                                                                                                                                                                  | YLR194C                            | No                                                     | Yes                                                      |
| CAGL0A04169g | Ortholog(s) have role in mitochondrion inheritance and cellular bud neck, incipient cellular bud site, mitochondrial outer membrane localization                                                                                        | YLR190W                            | No                                                     | Yes                                                      |
| CAGL0A04213g | Has domain(s) with predicted nucleic acid binding, nucleotide binding activity                                                                                                                                                          | YBL051C                            | No                                                     | No                                                       |
| CAGL0A04433g | Ortholog(s) have thioredoxin peroxidase activity and role in cell redox homeostasis, cellular response to oxidative stress, response to cadmium ion, sporocarp development involved in sexual reproduction                              | YBL064C                            | Yes                                                    | No                                                       |
| CAGL0A04675g | Ortholog(s) have protein tag activity                                                                                                                                                                                                   | YBL078C                            | No                                                     | Yes                                                      |
| CAGL0B00308g | Ortholog(s) have protein anchor activity, role in vacuole inheritance and Myo2p-Vac17p-Vac8p transport complex, fungal-type vacuole membrane localization                                                                               | YCL063W                            | No                                                     | No                                                       |
| CAGL0B00726g | Has domain(s) with predicted ATP binding, phosphotransferase activity, alcohol group as acceptor activity and role in carbohydrate metabolic process                                                                                    | YCL040W                            | No                                                     | No                                                       |
| CAGL0B01100g | Phosphatidylethanolamine-binding protein                                                                                                                                                                                                | YLR178C                            | Yes                                                    | Yes                                                      |
| CAGL0B01188g | Ortholog(s) have chromatin binding activity, role in cellular response to DNA damage stimulus and Rpd3L-Expanded complex, mitochondrion localization                                                                                    | YLR183C                            | No                                                     | No                                                       |
| CAGL0B01203g | Ortholog(s) have cytosolic large ribosomal subunit localization                                                                                                                                                                         | YDR500C                            | Yes                                                    | No                                                       |
| CAGL0B01375g | Ortholog(s) have RNA polymerase II C-terminal domain phosphoserine binding, RNA polymerase II core binding, RNA polymerase II transcription factor binding transcription factor activity, triplex DNA binding activity                  | YOL145C                            | Yes                                                    | No                                                       |

|              |                                                                                                                                                                                                                                       |           |     |     |
|--------------|---------------------------------------------------------------------------------------------------------------------------------------------------------------------------------------------------------------------------------------|-----------|-----|-----|
| CAGL0B01441g | Ortholog(s) have histone deacetylase activity, transcription coactivator activity, transcription corepressor activity                                                                                                                 | YNL330C   | Yes | No  |
| CAGL0B01683g | Ortholog(s) have role in cellular copper ion homeostasis, endosomal transport, invasive growth in response to glucose limitation, pseudohyphal growth, vacuolar transport                                                             | YLR083C   | No  | No  |
| CAGL0B01815g | Ortholog(s) have structural constituent of ribosome activity and mitochondrial large ribosomal subunit, nucleolus localization                                                                                                        | YDR116C   | No  | No  |
| CAGL0B01881g | Ortholog(s) have tRNA (guanine-N2-)-methyltransferase activity, role in tRNA N2-guanine methylation and mitochondrion, nuclear inner membrane localization                                                                            | YDR120C   | Yes | No  |
| CAGL0B01925g | Has domain(s) with predicted ATP binding, protein kinase activity, protein tyrosine kinase activity, transferase activity, transferring phosphorus-containing groups activity and role in protein phosphorylation                     | YDR122W   | No  | Yes |
| CAGL0B02563g | Expressed protein of unknown function                                                                                                                                                                                                 | YML128C   | Yes | Yes |
| CAGL0B02761g | Ortholog(s) have phosphoprotein phosphatase activity, role in endoplasmic reticulum unfolded protein response, protein dephosphorylation, traversing start control point of mitotic cell cycle and endoplasmic reticulum localization | YLR361C   | No  | No  |
| CAGL0K04279g | Protein of unknown function                                                                                                                                                                                                           | YGR049W   | No  | No  |
| CAGL0B03091g | Protein of unknown function                                                                                                                                                                                                           | YGR041W   | No  | Yes |
| CAGL0B03465g | Ortholog(s) have role in ethanol metabolic process and mitochondrial inner membrane localization                                                                                                                                      | YLR251W   | No  | No  |
| CAGL0B03575g | Ortholog(s) have histone acetyltransferase activity, histone binding activity                                                                                                                                                         | YEL056W   | No  | No  |
| CAGL0B04301g | Ortholog(s) have cytosol localization                                                                                                                                                                                                 | YBR028C   | No  | No  |
| CAGL0C01199g | Putative Zn(2)-Cys(6) binuclear cluster transcription factor, involved in transcriptional regulation of ergosterol biosynthesis and uptake                                                                                            | YLR228C   | Yes | No  |
| CAGL0C01221g | Ortholog(s) have guanyl-nucleotide exchange factor activity, translation initiation factor activity and role in regulation of translational initiation                                                                                | YDR211W   | Yes | No  |
| CAGL0C01325g | Ortholog(s) have cytochrome-c oxidase activity, nitrite reductase (NO-forming) activity, role in mitochondrial electron transport, cytochrome c to oxygen and mitochondrial respiratory chain complex IV localization                 | YNL052W   | Yes | Yes |
| CAGL0C01435g | Ortholog(s) have role in ribosome biogenesis and mitochondrion localization                                                                                                                                                           | YPL183W-A | No  | No  |
| CAGL0C01441g | Ortholog(s) have role in endocytic recycling and cytosol, endosome, nucleus localization                                                                                                                                              | YPL183C   | No  | No  |
| CAGL0C01485g | Ortholog(s) have methylated histone binding, transcription factor binding activity                                                                                                                                                    | YPL182C   | No  | -   |
| CAGL0C01793g | Ortholog(s) have nascent polypeptide-associated complex binding activity, role in protein targeting to mitochondrion, ribosome localization and integral component of mitochondrial outer membrane localization                       | YBR230C   | No  | No  |
| CAGL0C01947g | Ortholog(s) have glutamate-tRNA ligase activity, mRNA binding activity, role in glutamyl-tRNA aminoacylation and cytosol, methionyl glutamyl tRNA synthetase complex, mitochondrion, nucleus localization                             | YGL245W   | No  | No  |
| CAGL0C02607g | Ortholog(s) have ATP binding, phosphatidylinositol binding activity                                                                                                                                                                   | YLR396C   | No  | No  |
| CAGL0C02623g | Ortholog(s) have cytochrome-c oxidase activity, role in mitochondrial electron transport, cytochrome c to oxygen and mitochondrial respiratory chain complex IV, plasma membrane localization                                         | YLR395C   | No  | No  |
| CAGL0C02981g | Putative acyl-CoA:sterol acyltransferase involved in sterol esterification; gene is upregulated in azole-resistant strain                                                                                                             | YCR048W   | No  | No  |
| CAGL0C03597g | Putative actin-binding protein                                                                                                                                                                                                        | YCR088W   | No  | No  |
| CAGL0C04543g | Ortholog(s) have alditol:NADP+ 1-oxidoreductase activity, role in D-xylose catabolic process, arabinose catabolic process, cellular response to oxidative stress and cytosol, nucleus localization                                    | YJR096W   | No  | Yes |
| CAGL0C04741g | Cytosolic copper-zinc superoxide dismutase                                                                                                                                                                                            | YJR104C   | No  | Yes |
| CAGL0C05093g | Ortholog(s) have dipeptidyl-peptidase activity and cytoplasm, nucleus localization                                                                                                                                                    | YOL057W   | No  | No  |
| CAGL0C05291g | Ortholog(s) have cytosol localization                                                                                                                                                                                                 | YOL066C   | No  | No  |
| CAGL0C05313g | Ortholog(s) have peptide alpha-N-acetyltransferase activity, role in N-terminal protein amino acid acetylation and NatA complex, cytosolic ribosome, mitochondrion localization                                                       | YDL040C   | No  | No  |
| CAGL0C05335g | Ortholog(s) have sequence-specific DNA binding RNA polymerase II transcription factor activity, transcription regulatory region DNA binding activity                                                                                  | YOL067C   | No  | No  |
| CAGL0C05357g | Histone deacetylase; ortholog of S. cerevisiae SIR2; sensor of niacin limitation; regulates gene expression under niacin-limiting conditions                                                                                          | YOL068C   | No  | No  |
| CAGL0C05489g | Ortholog(s) have GTPase activator activity, role in regulation of vacuole fusion, non-autophagic, vesicle-mediated transport and cytosol, nucleus localization                                                                        | YDL234C   | No  | Yes |
| CAGL0D00418g | Protein of unknown function                                                                                                                                                                                                           | YKL187C   | No  | Yes |

|              |                                                                                                                                                                                                                                 |         |     |     |
|--------------|---------------------------------------------------------------------------------------------------------------------------------------------------------------------------------------------------------------------------------|---------|-----|-----|
| CAGL0D00704g | Ortholog(s) have endoplasmic reticulum, plasma membrane localization                                                                                                                                                            | YDL072C | No  | No  |
| CAGL0D00748g | Ortholog(s) have cytochrome-c oxidase activity, role in mitochondrial electron transport, cytochrome c to oxygen and mitochondrial respiratory chain complex IV, plasma membrane localization                                   | YDL067C | No  | No  |
| CAGL0D00858g | Ortholog(s) have structural constituent of ribosome activity and cytosolic small ribosomal subunit, nucleus localization                                                                                                        | YDL061C | No  | No  |
| CAGL0D01078g | Ortholog(s) have role in cargo loading into COPII-coated vesicle and COPII vesicle coat, cytosol, endoplasmic reticulum exit site localization                                                                                  | YNL049C | No  | No  |
| CAGL0D01672g | Ortholog(s) have role in Golgi inheritance, Golgi to plasma membrane transport, endoplasmic reticulum inheritance, exocytosis                                                                                                   | YPR055W | Yes | No  |
| CAGL0D01804g | Ortholog(s) have D-serine ammonia-lyase activity, role in D-serine metabolic process and cytosol, nucleus localization                                                                                                          | YGL196W | Yes | No  |
| CAGL0D01958g | Ortholog(s) have mitochondrion, plasma membrane localization                                                                                                                                                                    | YKL141W | Yes | No  |
| CAGL0D02310g | Ortholog(s) have mRNA binding activity, role in reciprocal meiotic recombination and mitochondrion localization                                                                                                                 | YOR354C | No  | Yes |
| CAGL0D03124g | Ortholog(s) have role in cellular response to drug, rRNA processing, ribosomal large subunit assembly and nucleolus, preribosome, large subunit precursor localization                                                          | YLL008W | No  | No  |
| CAGL0D03586g | Ortholog(s) have role in long-chain fatty acid biosynthetic process, mitochondrial respiratory chain complex I assembly and mitochondrion localization                                                                          | YKL192C | No  | No  |
| CAGL0D03630g | Ortholog(s) have ATPase activity, polynucleotide 5'-phosphatase activity                                                                                                                                                        | YPL228W | No  | No  |
| CAGL0D03652g | Ortholog(s) have role in chromatin silencing at rDNA, chromatin silencing at silent mating-type cassette, chromatin silencing at telomere, regulation of transcription from RNA polymerase II promoter and nucleus localization | YMR179W | No  | No  |
| CAGL0D03674g | Ortholog(s) have ATP binding, ATPase activity, mRNA binding activity and role in poly(A)+ mRNA export from nucleus, ribosomal small subunit biogenesis                                                                          | YPL226W | No  | No  |
| CAGL0D03762g | Protein of unknown function                                                                                                                                                                                                     | YDR309C | No  | Yes |
| CAGL0D03982g | Ortholog(s) have 1-pyrroline-5-carboxylate dehydrogenase activity, role in glutamate biosynthetic process, hyphal growth, proline catabolic process to glutamate and cytosol, mitochondrial matrix localization                 | YHR037W | Yes | No  |
| CAGL0D04114g | Ortholog(s) have NADPH-hemoprotein reductase activity, electron carrier activity, role in cellular response to drug, ergosterol biosynthetic process and endoplasmic reticulum, mitochondrial outer membrane localization       | YHR042W | No  | Yes |
| CAGL0D04312g | Ortholog(s) have mRNA binding, ribosomal small subunit binding activity                                                                                                                                                         | YMR080C | Yes | No  |
| CAGL0D04752g | Ortholog(s) have pyridoxine:NADP 4-dehydrogenase activity, role in pyridoxal biosynthetic process and cytosol, nucleus localization                                                                                             | YPR127W | Yes | No  |
| CAGL0D05632g | Ortholog(s) have copper chaperone activity, role in intracellular copper ion transport, mitochondrial respiratory chain complex IV assembly and cytosol, mitochondrial intermembrane space, nucleus localization                | YLL009C | No  | Yes |
| CAGL0D06050g | Protein of unknown function                                                                                                                                                                                                     | YJR054W | No  | No  |
| CAGL0D06468g | Ortholog(s) have NEDD8 transferase activity, role in protein neddylation, regulation of mitotic cell cycle and cytosol, nucleus localization                                                                                    | YLR306W | No  | No  |
| CAGL0D06556g | Ortholog(s) have RNA binding, aspartate-tRNA ligase activity, role in aspartyl-tRNA aminoacylation and cytosol, nucleus localization                                                                                            | YLL018C | Yes | No  |
| CAGL0E00385g | Ortholog(s) have oligopeptide-transporting ATPase activity, role in oligopeptide export from mitochondrion and mitochondrial inner membrane localization                                                                        | YLR188W | No  | No  |
| CAGL0E00451g | Ortholog(s) have role in cellular response to biotic stimulus, cellular response to starvation and filamentous growth of a population of unicellular organisms in response to biotic stimulus, more                             | YCR093W | No  | Yes |
| CAGL0E00759g | Ortholog(s) have inositol tetrakisphosphate 3-kinase activity, inositol tetrakisphosphate 6-kinase activity and inositol-1,3,4,5,6-pentakisphosphate kinase activity, more                                                      | YDR173C | Yes | No  |
| CAGL0E01177g | Cyclophilin; peptidyl-prolyl cis-trans isomerase                                                                                                                                                                                | YDR154C | Yes | -   |
| CAGL0E01331g | Transcription factor; mutants display increased fungal burdens in mouse lungs and brain                                                                                                                                         | YDR146C | Yes | No  |
| CAGL0E01573g | Ortholog(s) have role in fungal-type cell wall organization and cytosol, nucleus localization                                                                                                                                   | YNL313C | Yes | No  |
| CAGL0E01617g | Ortholog(s) have inorganic cation transmembrane transporter activity, role in magnesium ion transport and cytoplasm, plasma membrane localization                                                                               | YOL130W | No  | No  |
| CAGL0E01903g | Ortholog(s) have tRNA methyltransferase activity, role in tRNA methylation and cytoplasm, nucleus localization                                                                                                                  | YOL125W | No  | Yes |

|              |                                                                                                                                                                                                                                   |         |     |     |
|--------------|-----------------------------------------------------------------------------------------------------------------------------------------------------------------------------------------------------------------------------------|---------|-----|-----|
| CAGL0E01947g | Ortholog(s) have mRNA binding activity, role in mRNA cleavage, mRNA polyadenylation, response to DNA damage checkpoint signaling and cytoplasmic stress granule, mRNA cleavage factor complex localization                        | YOL123W | Yes | Yes |
| CAGL0E02101g | Has domain(s) with predicted nucleotidyltransferase activity                                                                                                                                                                      | YOL115W | No  | No  |
| CAGL0E02431g | Has domain(s) with predicted DNA binding, DNA topoisomerase type I activity, DNA topoisomerase type II (ATP-hydrolyzing) activity, role in DNA topological change and chromosome localization                                     | YOL006C | No  | No  |
| CAGL0E02585g | Ortholog(s) have 3'-5'-exoribonuclease activity                                                                                                                                                                                   | YOR001W | No  | No  |
| CAGL0E04334g | Putative cytochrome P-450 lanosterol 14-alpha-demethylase; target enzyme of azole antifungal drugs; increased protein abundance in azole resistant strain                                                                         | YHR007C | No  | Yes |
| CAGL0E05214g | Ortholog(s) have cytosol, nucleus localization                                                                                                                                                                                    | YPL088W | No  | Yes |
| CAGL0E05302g | Ortholog(s) have protein phosphatase 1 binding activity, role in actin filament organization, cortical actin cytoskeleton organization, endocytosis, protein secretion and actin cortical patch, nucleus localization             | YOR329C | No  | No  |
| CAGL0E05324g | Ortholog(s) have 3'-5' exonuclease activity, DNA-directed DNA polymerase activity, role in DNA biosynthetic process, mitochondrial DNA replication and mitochondrion localization                                                 | YOR330C | No  | No  |
| CAGL0E05368g | Ortholog(s) have magnesium ion transmembrane transporter activity, role in mitochondrial magnesium ion transport and mitochondrial inner membrane localization                                                                    | YOR334W | No  | No  |
| CAGL0E05434g | Ortholog(s) have sequence-specific DNA binding activity                                                                                                                                                                           | YOR337W | No  | No  |
| CAGL0E05896g | Ortholog(s) have GTP binding, GTPase activity                                                                                                                                                                                     | YPL218W | No  | No  |
| CAGL0E05918g | Has domain(s) with predicted protein kinase binding activity and role in regulation of cyclin-dependent protein serine/threonine kinase activity                                                                                  | YGL134W | No  | No  |
| CAGL0E05984g | No Description Available                                                                                                                                                                                                          | YPL223C | No  | No  |
| CAGL0E06248g | Regulator of calcineurin; required for cell growth and activation of the calcineurin-Crz1 pathway in the presence of micafungin; activates calcineurin-dependent signaling                                                        | YKL159C | No  | No  |
| CAGL0F00561g | Ortholog(s) have RNA polymerase I activity and role in termination of RNA polymerase I transcription, transcription of nuclear large rRNA transcript from RNA polymerase I promoter                                               | YJR063W | No  | No  |
| CAGL0F00671g | Ortholog(s) have role in actin filament bundle retrograde transport, establishment or maintenance of cell polarity regulating cell shape, formin-nucleated actin cable assembly and hyphal growth, more                           | YOR326W | No  | No  |
| CAGL0F00737g | Ortholog(s) have ubiquitin protein ligase binding activity and role in positive regulation of receptor internalization, protein ubiquitination, ubiquitin-dependent endocytosis                                                   | YOR322C | No  | No  |
| CAGL0F00803g | Component of the transcriptional Mediator complex that provides interfaces between RNA polymerase II and upstream activator proteins; one of the two Gal11p homologs of <i>S. cerevisiae</i> Gal11p present in <i>C. glabrata</i> | YOL051W | Yes | Yes |
| CAGL0F00869g | Ortholog(s) have role in ascospore wall assembly and ascospore wall, lipid particle, prospore membrane localization                                                                                                               | YOL048C | No  | Yes |
| CAGL0F01023g | Ortholog(s) have role in maturation of LSU-rRNA from tricistronic rRNA transcript (SSU-rRNA, 5.8S rRNA, LSU-rRNA) and nucleolus, preribosome, large subunit precursor localization                                                | YOL041C | Yes | No  |
| CAGL0F01331g | Ortholog(s) have role in mitochondrial RNA 5'-end processing and mitochondrial envelope localization                                                                                                                              | YOR017W | No  | No  |
| CAGL0F01573g | Ortholog(s) have mRNA binding, translation regulator activity and role in mitochondrial respiratory chain complex IV biogenesis, positive regulation of mitochondrial translational initiation                                    | YLR067C | Yes | No  |
| CAGL0F01705g | Putative cytosolic phenylalanyl-tRNA synthetase, alpha subunit                                                                                                                                                                    | YLR060W | No  | No  |
| CAGL0F01771g | Ortholog(s) have role in ER-associated ubiquitin-dependent protein catabolic process and endoplasmic reticulum localization                                                                                                       | YLR057W | No  | No  |
| CAGL0F01969g | No Description Available                                                                                                                                                                                                          | YLR049C | No  | No  |
| CAGL0F01991g | Ortholog(s) have endoplasmic reticulum localization                                                                                                                                                                               | YLR050C | No  | No  |
| CAGL0F02233g | Ortholog(s) have dipeptidase activity                                                                                                                                                                                             | YFR006W | Yes | No  |
| CAGL0F02937g | Ortholog(s) have role in ribosomal large subunit assembly and cytosolic large ribosomal subunit, nucleolus localization                                                                                                           | YDR417C | Yes | -   |
| CAGL0F03575g | Ortholog(s) have role in protein targeting to vacuole involved in ubiquitin-dependent protein catabolic process via the multivesicular body sorting pathway and fungal-type vacuole localization                                  | YPL176C | No  | No  |
| CAGL0F03619g | Ortholog(s) have role in establishment of mitotic spindle orientation and astral microtubule, cell cortex, dynactin complex, spindle pole body localization                                                                       | YPL174C | No  | No  |

|              |                                                                                                                                                                                                                                             |           |     |     |
|--------------|---------------------------------------------------------------------------------------------------------------------------------------------------------------------------------------------------------------------------------------------|-----------|-----|-----|
| CAGL0F03773g | Ortholog(s) have role in establishment of protein localization to plasma membrane and mitochondrion, plasma membrane localization                                                                                                           | YMR212C   | No  | No  |
| CAGL0F03795g | Ortholog(s) have role in mitochondrial genome maintenance, plasmid maintenance and cytosol, mitochondrion localization                                                                                                                      | YMR211W   | No  | No  |
| CAGL0F03905g | Ortholog(s) have RNA uridylyltransferase activity, protein serine/threonine kinase activity                                                                                                                                                 | YMR216C   | No  | No  |
| CAGL0F03993g | Ortholog(s) have phosphomevalonate kinase activity                                                                                                                                                                                          | YMR220W   | No  | No  |
| CAGL0F04697g | Ortholog(s) have cytoplasm localization                                                                                                                                                                                                     | YLR257W   | Yes | Yes |
| CAGL0F04719g | Ortholog(s) have glycogen (starch) synthase activity, role in glycogen biosynthetic process and cytoplasm, nucleus localization                                                                                                             | YLR258W   | Yes | Yes |
| CAGL0F04873g | Ortholog(s) have endoplasmic reticulum localization                                                                                                                                                                                         | YPR159W   | No  | No  |
| CAGL0F04939g | Ortholog(s) have DNA replication origin binding, chromatin binding, single-stranded DNA binding, single-stranded DNA-dependent ATP-dependent DNA helicase activity                                                                          | YLR274W   | No  | No  |
| CAGL0F05005g | Ortholog(s) have cytosol, mRNA cleavage and polyadenylation specificity factor complex localization                                                                                                                                         | YLR277C   | No  | No  |
| CAGL0F05357g | Ortholog(s) have RNA polymerase II core promoter proximal region sequence-specific DNA binding, more                                                                                                                                        | YDR207C   | Yes | Yes |
| CAGL0F05863g | Ortholog(s) have succinate dehydrogenase (ubiquinone) activity, role in mitochondrial electron transport, succinate to ubiquinone and mitochondrial respiratory chain complex II, succinate dehydrogenase complex (ubiquinone) localization | YDR178W   | Yes | Yes |
| CAGL0F05885g | Ortholog(s) have cytoskeletal protein binding activity                                                                                                                                                                                      | YMR032W   | No  | Yes |
| CAGL0F05907g | Ortholog(s) have DNA translocase activity                                                                                                                                                                                                   | YMR033W   | Yes | No  |
| CAGL0F05929g | Ortholog(s) have role in calcium ion import and plasma membrane localization                                                                                                                                                                | YMR034C   | Yes | No  |
| CAGL0M13189g | Putative transcription factor similar to <i>S. cerevisiae</i> Msn2p; involved in response to oxidative stress                                                                                                                               | YKL062W   | No  | Yes |
| CAGL0F06171g | Has domain(s) with predicted role in transport and nuclear pore localization                                                                                                                                                                | YKL068W   | No  | No  |
| CAGL0F06325g | Protein of unknown function                                                                                                                                                                                                                 | YKL072W   | Yes | No  |
| CAGL0F06567g | Ortholog(s) have translation regulator activity, role in regulation of translation and mitochondrion localization                                                                                                                           | YMR064W   | No  | No  |
| CAGL0F06633g | Ortholog(s) have protein complex binding activity and role in ER-associated ubiquitin-dependent protein catabolic process, sporulation resulting in formation of a cellular spore                                                           | YMR067C   | No  | No  |
| CAGL0F06897g | Putative protein with alcohol dehydrogenase domain; gene is downregulated in azole-resistant strain                                                                                                                                         | YIR035C   | No  | No  |
| CAGL0F07249g | Ortholog(s) have RNA polymerase II activating transcription factor binding, chromatin binding, protein complex scaffold activity                                                                                                            | YGL112C   | No  | No  |
| CAGL0F07403g | Ortholog(s) have role in ribosomal large subunit biogenesis and nucleolus, preribosome, large subunit precursor localization                                                                                                                | YGL111W   | No  | Yes |
| CAGL0F07601g | Putative GPI-linked cell wall protein                                                                                                                                                                                                       | YKL096W-A | No  | No  |
| CAGL0F07799g | Ortholog(s) have role in protein targeting to vacuole involved in ubiquitin-dependent protein catabolic process via the multivesicular body sorting pathway and endosome localization                                                       | YMR171C   | No  | No  |
| CAGL0F08393g | Ortholog(s) have role in Golgi to vacuole transport, protein targeting to vacuole and AP-3 adaptor complex localization                                                                                                                     | YGR261C   | No  | No  |
| CAGL0F08569g | Ortholog(s) have RSC complex, cytosol localization                                                                                                                                                                                          | YLR321C   | No  | No  |
| CAGL0F08789g | Ortholog(s) have mitochondrial outer membrane localization                                                                                                                                                                                  | YGR012W   | No  | No  |
| CAGL0F08965g | Ortholog(s) have role in reciprocal meiotic recombination and cytosol, endoplasmic reticulum, nucleus localization                                                                                                                          | YHR039C   | No  | No  |
| CAGL0F09075g | Ortholog(s) have protein serine/threonine kinase activity                                                                                                                                                                                   | YHR205W   | No  | No  |
| CAGL0G00726g | DNA replication factor A, 69 KD subunit; protein abundance increased in ace2 mutant cells                                                                                                                                                   | YAR007C   | No  | Yes |
| CAGL0G01056g | Putative glycoside hydrolase of the Gas/Phr family; predicted GPI-anchor                                                                                                                                                                    | YLR343W   | No  | No  |
| CAGL0G01122g | Putative protein; gene is upregulated in azole-resistant strain                                                                                                                                                                             | YLR346C   | No  | No  |
| CAGL0G01188g | Ortholog(s) have role in cellular sphingolipid homeostasis, negative regulation of sphingolipid biosynthetic process, response to unfolded protein and SPOTS complex localization                                                           | YLR350W   | No  | No  |
| CAGL0G01364g | Ortholog(s) have glycine-tRNA ligase activity, role in glycyl-tRNA aminoacylation and cytosol, mitochondrion localization                                                                                                                   | YBR121C   | Yes | No  |
| CAGL0G01452g | Ortholog(s) have role in ER to Golgi vesicle-mediated transport and ER to Golgi transport vesicle, Golgi apparatus, endoplasmic reticulum localization                                                                                      | YNL043C   | No  | -   |
| CAGL0G01584g | Ortholog(s) have TFIIIC-class transcription factor binding activity                                                                                                                                                                         | YNL039W   | No  | No  |
| CAGL0G01628g | Ortholog(s) have role in single-species biofilm formation on inanimate substrate and cytosol, nucleus localization                                                                                                                          | YNL035C   | Yes | Yes |

|              |                                                                                                                                                                                                                                       |           |     |     |
|--------------|---------------------------------------------------------------------------------------------------------------------------------------------------------------------------------------------------------------------------------------|-----------|-----|-----|
| CAGL0G01991g | Ortholog(s) have endoribonuclease activity, small ribosomal subunit rRNA binding activity and role in maturation of SSU-rRNA from tricistronic rRNA transcript (SSU-rRNA, 5.8S rRNA, LSU-rRNA), proteasome assembly                   | YOR056C   | No  | No  |
| CAGL0G02145g | Ortholog(s) have phosphatidylinositol-3-phosphate binding, protein transporter activity and role in protein retention in Golgi apparatus, retrograde transport, endosome to Golgi                                                     | YKR078W   | No  | No  |
| CAGL0G02475g | Ortholog(s) have role in protein ubiquitination, ribosomal large subunit assembly, ribosomal large subunit export from nucleus and cytosol, mitochondrion, nucleolus localization                                                     | YIL148W   | No  | No  |
| CAGL0G03047g | Ortholog(s) have protein serine/threonine kinase activity                                                                                                                                                                             | YGR092W   | No  | Yes |
| CAGL0G03091g | Ortholog(s) have valine-tRNA ligase activity, role in valyl-tRNA aminoacylation and cytosol, mitochondrion localization                                                                                                               | YGR094W   | No  | No  |
| CAGL0G03487g | Ortholog(s) have role in cellular copper ion homeostasis, cellular response to drug, invasive growth in response to glucose limitation, pseudohyphal growth, vacuolar transport and COPI-coated vesicle, Golgi apparatus localization | YER113C   | Yes | No  |
| CAGL0G03575g | Has domain(s) with predicted structural constituent of ribosome activity, role in translation and ribosome localization; evidence for a extended second exon by 2 amino acids                                                         | YBL087C   | Yes | No  |
| CAGL0G03729g | Ortholog(s) have transcription coactivator activity, role in positive regulation of transcription involved in G2/M transition of mitotic cell cycle and nucleus localization                                                          | YOR372C   | No  | No  |
| CAGL0G03773g | Ortholog(s) have structural constituent of nuclear pore activity                                                                                                                                                                      | YLL023C   | Yes | No  |
| CAGL0G04389g | Has domain(s) with predicted sequence-specific DNA binding, sequence-specific DNA binding transcription factor activity, zinc ion binding activity and role in regulation of transcription, DNA-templated                             | YJL110C   | No  | No  |
| CAGL0G04763g | Ortholog(s) have GTPase activator activity, role in adenylate cyclase-modulating G-protein coupled receptor signaling pathway and cytoplasm, nucleus localization                                                                     | YOR107W   | No  | No  |
| CAGL0G04961g | Ortholog(s) have glutathione-disulfide reductase activity and cytoplasm localization                                                                                                                                                  | YLR364W   | No  | No  |
| CAGL0G05027g | Ortholog(s) have small ribosomal subunit rRNA binding, structural constituent of ribosome activity and role in maturation of SSU-rRNA from tricistronic rRNA transcript (SSU-rRNA, 5.8S rRNA, LSU-rRNA)                               | YDR064W   | No  | No  |
| CAGL0G05335g | Ortholog(s) have trehalose-phosphatase activity                                                                                                                                                                                       | YDR074W   | No  | No  |
| CAGL0G05445g | Ortholog(s) have role in sporulation resulting in formation of a cellular spore and cytoplasm localization                                                                                                                            | YDL226C   | Yes | No  |
| CAGL0G05830g | Protein of unknown function                                                                                                                                                                                                           | YHR146W   | Yes | No  |
| CAGL0G05940g | Ortholog(s) have cytosolic large ribosomal subunit localization                                                                                                                                                                       | YDL184C   | Yes | No  |
| CAGL0G05984g | Ortholog(s) have role in cell wall assembly and extracellular region localization                                                                                                                                                     | YHR139C   | No  | Yes |
| CAGL0G06028g | Putative aromatic aminotransferase II                                                                                                                                                                                                 | YHR137W   | Yes | No  |
| CAGL0G06138g | Ortholog(s) have role in conidium formation, protein phosphorylation, regulation of cell shape, regulation of growth rate and fungal-type vacuole membrane localization                                                               | YHR135C   | Yes | No  |
| CAGL0G06380g | Ortholog(s) have role in aerobic respiration and mitochondrion, nucleus localization                                                                                                                                                  | YOR355W   | No  | No  |
| CAGL0G06688g | bZIP domain-containing protein                                                                                                                                                                                                        | YNL103W   | No  | No  |
| CAGL0G07359g | Ortholog(s) have protein anchor activity and role in establishment of spindle pole body localization to nuclear envelope, mitotic spindle assembly, nuclear pore organization, spindle pole body duplication                          | YML031W   | No  | No  |
| CAGL0G07403g | Has domain(s) with predicted integral component of nuclear inner membrane localization                                                                                                                                                | YML034W   | Yes | Yes |
| CAGL0G07425g | Ortholog(s) have AMP deaminase activity, role in guanine salvage, purine nucleotide metabolic process and cytosol localization                                                                                                        | YML035C   | Yes | No  |
| CAGL0G07469g | Ortholog(s) have protein transporter activity and role in SRP-dependent cotranslational protein targeting to membrane, cytosol to ER transport, posttranslational protein targeting to membrane, translocation                        | YOR254C   | No  | No  |
| CAGL0G07667g | Protein of unknown function                                                                                                                                                                                                           | YJL079C   | No  | No  |
| CAGL0G07953g | Ortholog(s) have structural constituent of ribosome activity and mitochondrial small ribosomal subunit localization                                                                                                                   | YNR037C   | No  | No  |
| CAGL0G07975g | Ortholog(s) have role in maturation of 5.8S rRNA from tricistronic rRNA transcript (SSU-rRNA, 5.8S rRNA, LSU-rRNA), maturation of LSU-rRNA from tricistronic rRNA transcript (SSU-rRNA, 5.8S rRNA, LSU-rRNA)                          | YNR038W   | No  | No  |
| CAGL0G08173g | Ortholog(s) have protein tag, structural constituent of ribosome activity and role in maturation of SSU-rRNA from tricistronic rRNA transcript (SSU-rRNA, LSU-rRNA,5S), protein ubiquitination, ribosomal small subunit assembly      | YLR167W   | No  | No  |
| CAGL0G09042g | Protein of unknown function                                                                                                                                                                                                           | YPL202C   | No  | No  |
| CAGL0G09713g | Ortholog(s) have cytosol, nucleus localization                                                                                                                                                                                        | YLR287C-A | Yes | No  |

|              |                                                                                                                                                                                                                                                |           |     |     |
|--------------|------------------------------------------------------------------------------------------------------------------------------------------------------------------------------------------------------------------------------------------------|-----------|-----|-----|
| CAGL0G09779g | Ortholog(s) have role in termination of RNA polymerase II transcription, exosome-dependent, termination of RNA polymerase II transcription, poly(A)-coupled and mRNA cleavage and polyadenylation specificity factor complex localization      | YOR179C   | No  | No  |
| CAGL0G10153g | Ortholog(s) have ubiquinol-cytochrome-c reductase activity and role in aerobic respiration, mitochondrial electron transport, ubiquinol to cytochrome c, mitochondrial respiratory chain complex III assembly                                  | YDR529C   | No  | Yes |
| CAGL0H00308g | Ortholog(s) have chromatin binding activity, role in positive regulation of transcription elongation from RNA polymerase II promoter and NuA3b histone acetyltransferase complex, cytosol localization                                         | YLR455W   | No  | No  |
| CAGL0H00374g | Aspartyl protease that degrades alpha-factor                                                                                                                                                                                                   | YLR452C   | No  | Yes |
| CAGL0H00616g | Ortholog(s) have transcription coactivator activity, role in histone acetylation, transcription from RNA polymerase II promoter and Ada2/Gen5/Ada3 transcription activator complex, SAGA complex, SLIK (SAGA-like) complex localization        | YPL254W   | No  | No  |
| CAGL0H00737g | Has domain(s) with predicted intracellular localization                                                                                                                                                                                        | YMR192W   | Yes | No  |
| CAGL0H00781g | Ortholog(s) have Golgi apparatus, cytosol, nucleus localization                                                                                                                                                                                | YPL247C   | No  | Yes |
| CAGL0H01023g | Ortholog(s) have RNA-DNA hybrid ribonuclease activity, role in RNA catabolic process and nucleus, ribonuclease H2 complex localization                                                                                                         | YDR279W   | No  | Yes |
| CAGL0H01397g | Ortholog(s) have proton-transporting ATP synthase activity, rotational mechanism activity, role in ATP synthesis coupled proton transport and mitochondrial proton-transporting ATP synthase, stator stalk localization                        | YDR298C   | Yes | No  |
| CAGL0H01463g | Ortholog(s) have RNA binding activity and role in mRNA cleavage, mRNA polyadenylation, response to drug, termination of RNA polymerase II transcription                                                                                        | YDR301W   | No  | No  |
| CAGL0H01606g | No Description Available                                                                                                                                                                                                                       | YDR525W-A | No  | Yes |
| CAGL0H02343g | Ortholog(s) have histone deacetylase activity                                                                                                                                                                                                  | YMR263W   | No  | No  |
| CAGL0H02491g | Ortholog(s) have cytochrome-c oxidase activity, role in mitochondrial electron transport, cytochrome c to oxygen and mitochondrial respiratory chain complex IV, plasma membrane localization                                                  | YMR256C   | No  | No  |
| CAGL0H02783g | Protein of unknown function                                                                                                                                                                                                                    | YJL076W   | Yes | No  |
| CAGL0H03267g | Ortholog(s) have mRNA binding, transcription regulatory region RNA binding activity                                                                                                                                                            | YPL190C   | No  | No  |
| CAGL0H03487g | Ortholog(s) have RNA polymerase II core promoter proximal region sequence-specific DNA binding activity                                                                                                                                        | YGL071W   | Yes | No  |
| CAGL0H04125g | Ortholog(s) have D-arabinono-1,4-lactone oxidase activity                                                                                                                                                                                      | YML086C   | No  | No  |
| CAGL0H04191g | Ortholog(s) have proton-transporting ATP synthase activity, rotational mechanism activity and role in ATP synthesis coupled proton transport, mitochondrial proton-transporting ATP synthase complex assembly, protein complex oligomerization | YML081C-A | No  | No  |
| CAGL0H04411g | Ortholog(s) have 3'-5'-exoribonuclease activity, endoribonuclease activity, tRNA binding activity                                                                                                                                              | YOL021C   | No  | No  |
| CAGL0H04609g | Ortholog(s) have protein serine/threonine kinase activity, telomeric DNA binding activity and role in DNA damage induced protein phosphorylation, double-strand break repair, histone phosphorylation, telomere maintenance                    | YBL088C   | No  | No  |
| CAGL0H04691g | Ortholog(s) have structural constituent of ribosome activity and mitochondrial large ribosomal subunit localization                                                                                                                            | YML009C   | No  | No  |
| CAGL0H04697g | Ortholog(s) have RNA polymerase I core binding, RNA polymerase I transcription factor binding, RNA polymerase II core binding, core RNA polymerase II binding transcription factor activity, mRNA binding, rRNA binding activity               | YML010W   | No  | No  |
| CAGL0H04873g | Has domain(s) with predicted nucleic acid binding activity                                                                                                                                                                                     | YLR375W   | No  | No  |
| CAGL0H05071g | Ortholog(s) have SUMO transferase activity, damaged DNA binding, double-stranded DNA-dependent ATPase activity                                                                                                                                 | YLR383W   | No  | No  |
| CAGL0H05093g | Ortholog(s) have tRNA binding activity, role in regulation of transcription from RNA polymerase II promoter, tRNA wobble uridine modification and Elongator holoenzyme complex, cytosol, nucleus localization                                  | YLR384C   | No  | No  |
| CAGL0H05159g | Ortholog(s) have mitochondrion targeting sequence binding, protein channel activity and role in protein import into mitochondrial matrix, regulation of mitochondrial membrane permeability                                                    | YPL063W   | No  | No  |
| CAGL0H05203g | Ortholog(s) have role in protein localization to bud neck and cellular bud neck, cytoplasm localization                                                                                                                                        | YPL066W   | No  | No  |
| CAGL0H05291g | Putative heat shock protein                                                                                                                                                                                                                    | YPL070W   | No  | No  |
| CAGL0H05313g | Ortholog(s) have cytoplasm, nucleus localization                                                                                                                                                                                               | YPL071C   | Yes | No  |
| CAGL0H05357g | Ortholog(s) have cell cortex localization                                                                                                                                                                                                      | YPL074W   | No  | No  |

|              |                                                                                                                                                                                                                                     |           |     |     |
|--------------|-------------------------------------------------------------------------------------------------------------------------------------------------------------------------------------------------------------------------------------|-----------|-----|-----|
| CAGL0H05555g | Ortholog(s) have tRNA-intron endonuclease activity, role in tRNA-type intron splice site recognition and cleavage and mitochondrial outer membrane, tRNA-intron endonuclease complex localization                                   | YPL083C   | Yes | No  |
| CAGL0H05577g | Ortholog(s) have protein anchor activity, role in COPII vesicle coating, protein localization to endoplasmic reticulum exit site and ER to Golgi transport vesicle membrane, endoplasmic reticulum exit site localization           | YPL085W   | Yes | No  |
| CAGL0H05599g | Has domain(s) with predicted hydrolase activity, acting on carbon-nitrogen (but not peptide) bonds, in linear amides activity, role in ceramide metabolic process and integral component of membrane localization                   | YBR183W   | No  | No  |
| CAGL0H05709g | Ortholog(s) have role in assembly of large subunit precursor of preribosome, cellular response to drug, rRNA processing, ribosomal large subunit biogenesis, ribosomal subunit export from nucleus                                  | YPL093W   | No  | No  |
| CAGL0H05797g | Ortholog(s) have role in protein import into mitochondrial inner membrane, protein import into mitochondrial matrix and mitochondrial inner membrane presequence translocase complex, plasma membrane localization                  | YPL098C   | No  | No  |
| CAGL0H05929g | Protein of unknown function                                                                                                                                                                                                         | YPL105C   | No  | No  |
| CAGL0H06435g | Ortholog(s) have mitochondrion localization                                                                                                                                                                                         | YLR390W   | No  | Yes |
| CAGL0H06479g | Ortholog(s) have role in ribosomal large subunit biogenesis and cytoplasm, cytosolic large ribosomal subunit, preribosome, large subunit precursor localization                                                                     | YLR387C   | Yes | No  |
| CAGL0H06721g | Ortholog(s) have ubiquitin-specific protease activity                                                                                                                                                                               | YIL156W   | Yes | Yes |
| CAGL0H06743g | Ortholog(s) have role in mitochondrial respiratory chain complex IV assembly and integral component of mitochondrial inner membrane localization                                                                                    | YIL157C   | No  | No  |
| CAGL0H07023g | Ortholog(s) have proton-transporting ATP synthase activity, rotational mechanism, structural molecule activity and role in ATP synthesis coupled proton transport, cristae formation, protein complex oligomerization               | YDR322C-A | Yes | No  |
| CAGL0H07095g | Ortholog(s) have clathrin binding, ubiquitin binding activity                                                                                                                                                                       | YDR320C   | No  | No  |
| CAGL0H07667g | Ortholog(s) have 3',5'-cyclic-AMP phosphodiesterase activity, 3',5'-cyclic-GMP phosphodiesterase activity                                                                                                                           | YGL248W   | No  | No  |
| CAGL0H08085g | Ortholog(s) have 5'-3' exonuclease activity, 5'-flap endonuclease activity                                                                                                                                                          | YOR033C   | No  | No  |
| CAGL0H08217g | Ortholog(s) have ubiquitin binding activity, role in mitotic DNA integrity checkpoint and condensed nuclear chromosome kinetochore, mitotic checkpoint complex localization                                                         | YOR026W   | No  | No  |
| CAGL0H08541g | Ortholog(s) have DNA binding, bending, nucleosome binding, sequence-specific DNA binding activity                                                                                                                                   | YPR053C   | No  | -   |
| CAGL0H08734g | Ortholog(s) have cytosolic large ribosomal subunit localization                                                                                                                                                                     | YJR094W-A | Yes | No  |
| CAGL0H08976g | Ortholog(s) have cytosolic large ribosomal subunit localization                                                                                                                                                                     | YPL220W   | No  | No  |
| CAGL0H09108g | Ortholog(s) have cytosol, nucleus localization                                                                                                                                                                                      | YPL260W   | Yes | No  |
| CAGL0H09328g | Ortholog(s) have ubiquinol-cytochrome-c reductase activity and role in aerobic respiration, iron-sulfur cluster assembly, mitochondrial electron transport, ubiquinol to cytochrome c                                               | YGR183C   | No  | Yes |
| CAGL0H10186g | Ortholog(s) have ubiquitin-specific protease activity, role in negative regulation of gluconeogenesis, proteasome-mediated ubiquitin-dependent protein catabolic process, protein deubiquitination and nucleoplasm localization     | YBR058C   | No  | No  |
| CAGL0I00264g | Has domain(s) with predicted glutathione peroxidase activity and role in oxidation-reduction process, response to oxidative stress; mass spectrometry data support an N-terminal extension of this ORF                              | YKL026C   | Yes | Yes |
| CAGL0I00572g | Ortholog(s) have proton-transporting ATP synthase activity, rotational mechanism activity and role in ATP synthesis coupled proton transport, cristae formation, mitochondrial proton-transporting ATP synthase complex assembly    | YLR295C   | No  | No  |
| CAGL0I00770g | Ortholog(s) have nucleus localization                                                                                                                                                                                               | YMR144W   | No  | Yes |
| CAGL0I00792g | Ortholog(s) have role in maturation of SSU-rRNA from tricistronic rRNA transcript (SSU-rRNA, 5.8S rRNA, LSU-rRNA) and 90S preribosome, cytosol localization                                                                         | YDL083C   | Yes | No  |
| CAGL0I00814g | Ortholog(s) have protein kinase activator activity, structural constituent of ribosome activity, role in cytoplasmic translation, positive regulation of protein kinase activity and cytosolic large ribosomal subunit localization | YDL081C   | No  | No  |
| CAGL0I00836g | Ortholog(s) have Golgi apparatus, endoplasmic reticulum, fungal-type vacuole membrane localization                                                                                                                                  | YMR140W   | Yes | No  |
| CAGL0I00946g | Ortholog(s) have protein serine/threonine kinase inhibitor activity                                                                                                                                                                 | YOR039W   | No  | No  |
| CAGL0I00968g | Ortholog(s) have DNA binding, nucleosome binding, transcription corepressor activity                                                                                                                                                | YOR038C   | No  | No  |



|              |                                                                                                                                                                                                                                                |           |     |     |
|--------------|------------------------------------------------------------------------------------------------------------------------------------------------------------------------------------------------------------------------------------------------|-----------|-----|-----|
| CAGL0101408g | Ortholog(s) have electron carrier activity, role in mitochondrial electron transport, cytochrome c to oxygen, mitochondrial electron transport, ubiquinol to cytochrome c and cytosol, mitochondrial intermembrane space, nucleus localization | YJR048W   | No  | Yes |
| CAGL0101430g | Ortholog(s) have cytosol, nucleolus localization                                                                                                                                                                                               | YJR047C   | No  | No  |
| CAGL0101474g | Ortholog(s) have DNA replication origin binding activity                                                                                                                                                                                       | YJR046W   | Yes | Yes |
| CAGL0101518g | Ortholog(s) have role in late endosome to vacuole transport via multivesicular body sorting pathway and Golgi apparatus, Vps55/Vps68 complex, fungal-type vacuole membrane, late endosome localization                                         | YJR044C   | No  | No  |
| CAGL0101848g | Protein of unknown function                                                                                                                                                                                                                    | YHR149C   | No  | Yes |
| CAGL0102200g | Putative 6-phosphogluconolactonase                                                                                                                                                                                                             | YGR248W   | No  | No  |
| CAGL0102266g | Ortholog(s) have U1 snRNA binding, U2 snRNA binding, U5 snRNA binding, U6 snRNA binding, mRNA binding, pre-mRNA intronic binding, second spliceosomal transesterification activity                                                             | YHR165C   | No  | No  |
| CAGL0102684g | Ortholog(s) have cytosol, nucleus localization                                                                                                                                                                                                 | YMR285C   | No  | No  |
| CAGL0103718g | Ortholog(s) have ubiquitin binding activity, role in ER to Golgi vesicle-mediated transport, hyphal growth, nuclear division, retrograde vesicle-mediated transport, Golgi to ER and COPI vesicle coat, hyphal tip localization                | YDL145C   | No  | No  |
| CAGL0104125g | Ortholog(s) have role in protein N-linked glycosylation and oligosaccharyltransferase complex localization                                                                                                                                     | YGL226C-A | No  | No  |
| CAGL0104862g | Predicted plasma membrane ATP-binding cassette (ABC) transporter, putative transporter involved in multidrug resistance; involved in Pdr1p-mediated azole resistance                                                                           | YDR011W   | Yes | No  |
| CAGL0105390g | Ortholog(s) have protein serine/threonine kinase activity                                                                                                                                                                                      | YPL026C   | No  | No  |
| CAGL0105676g | Ortholog(s) have RNA-dependent ATPase activity, role in generation of catalytic spliceosome for first transesterification step, snoRNA splicing and U2-type catalytic step 1 spliceosome localization                                          | YNR011C   | No  | No  |
| CAGL0105852g | Protein of unknown function                                                                                                                                                                                                                    | YPL256C   | No  | No  |
| CAGL0106270g | Ortholog(s) have ubiquinol-cytochrome-c reductase activity, role in aerobic respiration, mitochondrial electron transport, ubiquinol to cytochrome c and mitochondrial respiratory chain complex III, plasma membrane localization             | YJL166W   | No  | No  |
| CAGL0106534g | Ortholog(s) have ion channel activity, membrane insertase activity, mitochondrial ribosome binding activity                                                                                                                                    | YER154W   | No  | No  |
| CAGL0107425g | Ortholog(s) have role in attachment of telomere to nuclear envelope, reciprocal meiotic recombination, regulation of reciprocal meiotic recombination, synapsis and nuclear chromosome, telomeric region localization                          | YOL104C   | No  | No  |
| CAGL0107447g | Ortholog(s) have myo-inositol transmembrane transporter activity, role in carbohydrate import into cell, myo-inositol transport and Golgi apparatus, fungal-type vacuole membrane, plasma membrane localization                                | YOL103W   | Yes | No  |
| CAGL0107491g | Ortholog(s) have role in cellular zinc ion homeostasis and cytoplasm, nucleus localization                                                                                                                                                     | YOL101C   | Yes | Yes |
| CAGL0107579g | Ortholog(s) have tryptophan-tRNA ligase activity and cytosol localization                                                                                                                                                                      | YOL097C   | No  | No  |
| CAGL0107623g | Ortholog(s) have ATP-dependent 3'-5' DNA helicase activity, role in mitochondrial DNA metabolic process and mitochondrial matrix localization                                                                                                  | YOL095C   | No  | No  |
| CAGL0107645g | Putative fructose 1,6-bisphosphate aldolase; protein differentially expressed in azole resistant strain                                                                                                                                        | YOL094C   | No  | No  |
| CAGL0107733g | Ortholog(s) have ATP binding, ATPase activity, Y-form DNA binding, double-strand/single-strand DNA junction binding, four-way junction DNA binding and guanine/thymine mismatch binding, more                                                  | YOL090W   | No  | No  |
| CAGL0107865g | Ortholog(s) have Golgi apparatus, fungal-type vacuole, plasma membrane localization                                                                                                                                                            | YOL084W   | Yes | Yes |
| CAGL0107969g | Ortholog(s) have role in ATP synthesis coupled proton transport, protein complex oligomerization and mitochondrial proton-transporting ATP synthase complex, coupling factor F(o), plasma membrane localization                                | YOL077W-A | No  | No  |
| CAGL0107997g | Ortholog(s) have peptide alpha-N-acetyltransferase activity, role in N-terminal peptidyl-methionine acetylation, cytoskeleton organization, mitochondrion inheritance and NatB complex localization                                            | YOL076W   | No  | No  |
| CAGL0108019g | Ortholog(s) have fungal-type vacuole membrane localization                                                                                                                                                                                     | YOL075C   | No  | No  |
| CAGL0108327g | Ortholog(s) have GTP binding, tRNA binding, translation initiation factor activity, translation initiation factor binding activity                                                                                                             | YER025W   | No  | No  |
| CAGL0108591g | No Description Available                                                                                                                                                                                                                       | YER158C   | Yes | Yes |
| CAGL0108987g | Ortholog(s) have argininosuccinate lyase activity, role in arginine biosynthetic process via ornithine and cytosol localization                                                                                                                | YHR018C   | Yes | No  |

|              |                                                                                                                                                                                                                                            |         |     |     |
|--------------|--------------------------------------------------------------------------------------------------------------------------------------------------------------------------------------------------------------------------------------------|---------|-----|-----|
| CAGL0109064g | Ortholog(s) have protein serine/threonine phosphatase activity, protein tyrosine/serine/threonine phosphatase activity                                                                                                                     | YFR028C | Yes | No  |
| CAGL0109680g | Ortholog(s) have mitochondrion localization                                                                                                                                                                                                | YOR305W | No  | No  |
| CAGL0109768g | Ortholog(s) have role in mRNA splicing, via spliceosome, maturation of 5S rRNA and U4/U6 x U5 tri-snRNP complex localization                                                                                                               | YOR308C | No  | No  |
| CAGL0109878g | Ortholog(s) have myristoyl-CoA ligase activity, oleoyl-CoA ligase activity, palmitoyl-CoA ligase activity and role in long-chain fatty acid metabolic process, long-chain fatty-acyl-CoA metabolic process                                 | YMR246W | Yes | Yes |
| CAGL0109922g | Ortholog(s) have acetylglucosaminyltransferase activity, role in protein N-linked glycosylation and Golgi medial cisterna localization                                                                                                     | YOR320C | No  | No  |
| CAGL0110296g | No Description Available                                                                                                                                                                                                                   | YPR157W | No  | No  |
| CAGL0110494g | Ortholog(s) have role in eisosome assembly, establishment of protein localization to plasma membrane and Golgi apparatus, eisosome, growing cell tip, plasma membrane localization                                                         | YGR131W | Yes | No  |
| CAGL0110879g | Ortholog(s) have role in peroxisome organization and peroxisomal membrane localization                                                                                                                                                     | YPL112C | Yes | Yes |
| CAGL0110967g | Ortholog(s) have mRNA binding activity and role in intracellular mRNA localization, mRNA metabolic process, meiotic nuclear division, regulation of mitotic nuclear division                                                               | YOR198C | No  | No  |
| CAGL0J00319g | Ortholog(s) have inositol monophosphate 1-phosphatase activity, role in inositol phosphate dephosphorylation and cytoplasm, nucleus localization                                                                                           | YHR046C | No  | No  |
| CAGL0J00825g | Ortholog(s) have GTPase activator activity and clathrin-coated vesicle, endosome, trans-Golgi network localization                                                                                                                         | YJL044C | Yes | No  |
| CAGL0J02288g | Ortholog(s) have aspartic-type endopeptidase activity and role in adaptation of signaling pathway by response to pheromone involved in conjugation with cellular fusion, peptide catabolic process                                         | YIL015W | No  | No  |
| CAGL0J02442g | Ortholog(s) have chaperone binding, protein binding, bridging activity, role in protein import into mitochondrial matrix and plasma membrane, presequence translocase-associated import motor localization                                 | YIL022W | No  | No  |
| CAGL0J02684g | Ortholog(s) have protein binding, bridging activity, role in ergosterol biosynthetic process and endoplasmic reticulum membrane localization                                                                                               | YER044C | No  | Yes |
| CAGL0J02816g | Ortholog(s) have ferrous iron binding, oxidative DNA demethylase activity, peptidyl-proline dioxygenase activity, poly(A) binding activity                                                                                                 | YER049W | No  | No  |
| CAGL0J03014g | Ortholog(s) have RNA polymerase II regulatory region sequence-specific DNA binding, sequence-specific transcription regulatory region DNA binding RNA polymerase II transcription factor recruiting transcription factor activity          | YER064C | No  | No  |
| CAGL0J03652g | Ortholog(s) have aminoacyl-tRNA editing activity, leucine-tRNA ligase activity, role in leucyl-tRNA aminoacylation, regulation of TOR signaling and cytosol localization                                                                   | YPL160W | No  | Yes |
| CAGL0J03828g | Ortholog(s) have MAP kinase kinase activity, protein tyrosine kinase activity, structural constituent of cell wall activity                                                                                                                | YOR231W | No  | No  |
| CAGL0J04312g | Ortholog(s) have signal sequence binding activity, role in Golgi to vacuole transport, protein targeting to vacuole and Golgi apparatus localization                                                                                       | YNR065C | No  | No  |
| CAGL0J04708g | Ortholog(s) have ATP-dependent RNA helicase activity and role in generation of catalytic spliceosome for first transesterification step, spliceosomal complex disassembly                                                                  | YLR424W | No  | No  |
| CAGL0J04796g | Ortholog(s) have cytosol, nucleus localization                                                                                                                                                                                             | YLR427W | Yes | Yes |
| CAGL0J05236g | Ortholog(s) have mannose-ethanolamine phosphotransferase activity                                                                                                                                                                          | YJL062W | No  | No  |
| CAGL0J05566g | Ortholog(s) have role in cellular response to DNA damage stimulus, interspecies interaction between organisms and cytoplasmic mRNA processing body, cytosol, nucleus, polysome localization                                                | YNL085W | Yes | No  |
| CAGL0J06374g | Ortholog(s) have structural constituent of ribosome activity, role in cytoplasmic translation and cytosolic large ribosomal subunit localization                                                                                           | YDL130W | No  | No  |
| CAGL0J06578g | Ortholog(s) have 7S RNA binding activity, role in SRP-dependent cotranslational protein targeting to membrane, signal sequence recognition and cytosol, nucleus, signal recognition particle, endoplasmic reticulum targeting localization | YML105C | No  | No  |
| CAGL0J06600g | Orotate phosphoribosyltransferase 1                                                                                                                                                                                                        | YMR271C | No  | No  |
| CAGL0J06842g | Ortholog(s) have double-stranded DNA binding activity and role in nucleotide-excision repair, phosphorylation of RNA polymerase II C-terminal domain, transcription from RNA polymerase II promoter                                        | YPL122C | No  | No  |
| CAGL0J06996g | Ortholog(s) have GTPase activator activity, phosphatidylinositol-3-phosphate binding, phosphatidylinositol-4,5-bisphosphate binding activity                                                                                               | YPL115C | No  | Yes |

|              |                                                                                                                                                                                                                                         |         |     |     |
|--------------|-----------------------------------------------------------------------------------------------------------------------------------------------------------------------------------------------------------------------------------------|---------|-----|-----|
| CAGL0J07260g | Ortholog(s) have Rab GTPase binding, Rab geranylgeranyltransferase activity and role in ER to Golgi vesicle-mediated transport, activation of GTPase activity, protein geranylgeranylation, protein targeting to membrane               | YOR370C | Yes | Yes |
| CAGL0J07326g | Ortholog(s) have role in mRNA splicing, via spliceosome, maturation of SSU-rRNA, positive regulation of ATPase activity, positive regulation of helicase activity                                                                       | YNL224C | Yes | Yes |
| CAGL0J07436g | Putative ABC transporter                                                                                                                                                                                                                | YNL231C | No  | No  |
| CAGL0J07546g | Subtilisin-like protease (proprotein convertase) involved in processing of proteins required for cell surface integrity                                                                                                                 | YNL238W | No  | No  |
| CAGL0J07656g | Ortholog(s) have protein binding, bridging activity                                                                                                                                                                                     | YNL243W | Yes | Yes |
| CAGL0J07744g | Ortholog(s) have cysteine-tRNA ligase activity, role in cysteinyl-tRNA aminoacylation and cytosol, ribosome localization                                                                                                                | YNL247W | No  | No  |
| CAGL0J07920g | Ortholog(s) have 2-amino-4-hydroxy-6-hydroxymethylidihydropteridine diphosphokinase activity, dihydroneopterin aldolase activity, dihydropterotate synthase activity and role in tetrahydrofolate biosynthetic process                  | YNL256W | No  | No  |
| CAGL0J08272g | Ortholog(s) have glyoxylate reductase activity, role in glyoxylate catabolic process and cytosol, extracellular region, mitochondrion, nucleus localization                                                                             | YNL274C | Yes | Yes |
| CAGL0J08657g | Ortholog(s) have protein serine/threonine phosphatase activity and role in cellular response to cadmium ion, cellular response to drug, positive regulation of catalytic activity, protein dephosphorylation                            | YOR090C | No  | No  |
| CAGL0J09372g | Ortholog(s) have hydrolase activity, role in nucleotide metabolic process and cytoplasm, nucleus localization                                                                                                                           | YDL125C | No  | Yes |
| CAGL0J09504g | Ortholog(s) have methylenetetrahydrofolate reductase (NAD(P)H) activity and role in methionine biosynthetic process, one-carbon metabolic process                                                                                       | YPL023C | No  | No  |
| CAGL0J09548g | Ortholog(s) have DNA translocase activity, RNA polymerase II activating transcription factor binding activity                                                                                                                           | YPL016W | No  | No  |
| CAGL0J09900g | Ortholog(s) have extracellular region localization                                                                                                                                                                                      | YNL055C | No  | No  |
| CAGL0J10120g | Has domain(s) with predicted sequence-specific DNA binding, sequence-specific DNA binding transcription factor activity and role in regulation of transcription, DNA-templated                                                          | YNL068C | No  | No  |
| CAGL0J10164g | Putative ribosomal protein                                                                                                                                                                                                              | YNL069C | Yes | No  |
| CAGL0J10179g | Ortholog(s) have protein channel activity, role in protein import into mitochondrial matrix, protein import into mitochondrial outer membrane and mitochondrial outer membrane translocase complex localization                         | YNL070W | No  | No  |
| CAGL0J10274g | Ortholog(s) have role in mitochondria-nucleus signaling pathway, negative regulation of transcription from RNA polymerase II promoter, regulation of nitrogen utilization, regulation of pseudohyphal growth and cytoplasm localization | YNL076W | No  | No  |
| CAGL0J10406g | Ortholog(s) have enzyme activator activity, phosphatidylinositol-3,5-bisphosphate binding, phosphatidylinositol-3-phosphate binding, tRNA binding activity                                                                              | YGL105W | No  | No  |
| CAGL0J10846g | Ortholog(s) have cyclin-dependent protein serine/threonine kinase regulator activity                                                                                                                                                    | YHR071W | Yes | Yes |
| CAGL0J11242g | Has domain(s) with predicted GTP binding, GTPase activity, role in protein transport, signal transduction, small GTPase mediated signal transduction and intracellular, membrane localization                                           | YNL180C | No  | No  |
| CAGL0J11440g | Ortholog(s) have protein binding, bridging, protein transporter activity and role in proteasome localization, protein import into nucleus, protein targeting to membrane                                                                | YNL189W | No  | No  |
| CAGL0J11638g | Ortholog(s) have enzyme activator activity, protein kinase activity                                                                                                                                                                     | YMR001C | No  | No  |
| CAGL0K00297g | Ortholog(s) have phosphatidylinositol-3,5-bisphosphate 5-phosphatase activity, phosphatidylinositol-3-phosphatase activity, phosphatidylinositol-4-phosphate phosphatase activity                                                       | YKL212W | No  | No  |
| CAGL0K00473g | Ortholog(s) have Ran GTPase binding activity, role in tRNA re-export from nucleus and cytosol, mitochondrion, nuclear envelope, nuclear matrix localization                                                                             | YKL205W | No  | No  |
| CAGL0K00495g | Ortholog(s) have eukaryotic initiation factor 4E binding, mRNA binding activity and role in deadenylation-dependent decapping of nuclear-transcribed mRNA, negative regulation of translation                                           | YKL204W | No  | Yes |
| CAGL0K00671g | Has domain(s) with predicted structural constituent of ribosome activity, role in translation and ribosome localization                                                                                                                 | YCR031C | No  | No  |
| CAGL0K00803g | Protein described as thioredoxin involved in oxidative stress response; expression upregulated in biofilm vs planktonic cell culture                                                                                                    | YGR209C | No  | No  |
| CAGL0K00913g | Ortholog(s) have formate-tetrahydrofolate ligase activity, methylenetetrahydrofolate cyclohydrolase activity, methylenetetrahydrofolate dehydrogenase (NADP+) activity, single-stranded DNA binding activity                            | YGR204W | No  | No  |

|              |                                                                                                                                                                                                                                               |           |     |     |
|--------------|-----------------------------------------------------------------------------------------------------------------------------------------------------------------------------------------------------------------------------------------------|-----------|-----|-----|
| CAGL0K00935g | Ortholog(s) have phosphatase activity, thiosulfate sulfurtransferase activity, role in dephosphorylation and cytosol, nucleus localization                                                                                                    | YGR203W   | No  | No  |
| CAGL0K02123g | Ortholog(s) have role in rRNA export from nucleus and cytosol localization                                                                                                                                                                    | YGL189C   | Yes | No  |
| CAGL0K02167g | Ortholog(s) have protein serine/threonine kinase activity, role in glucose metabolic process, protein phosphorylation and cytoplasm localization                                                                                              | YGL179C   | No  | No  |
| CAGL0K02409g | Ortholog(s) have proton-transporting ATP synthase activity, rotational mechanism activity and role in ATP synthesis coupled proton transport, cristae formation, protein complex oligomerization                                              | YPR020W   | No  | No  |
| CAGL0K02893g | Ortholog(s) have ubiquinol-cytochrome-c reductase activity, role in aerobic respiration, mitochondrial electron transport, ubiquinol to cytochrome c and mitochondrial respiratory chain complex III localization                             | YHR001W-A | No  | No  |
| CAGL0K03003g | Ortholog(s) have RNA polymerase II activating transcription factor binding and RNA polymerase II core promoter proximal region sequence-specific DNA binding, more                                                                            | YMR070W   | No  | Yes |
| CAGL0K03465g | Ortholog(s) have acetolactate synthase activity, flavin adenine dinucleotide binding activity, role in isoleucine biosynthetic process, valine biosynthetic process and acetolactate synthase complex, mitochondrion localization             | YMR108W   | Yes | No  |
| CAGL0K03487g | Ortholog(s) have role in actin cortical patch assembly, actin cortical patch localization, actin nucleation, ascospore wall assembly, cell tip growth and endocytosis, more                                                                   | YMR109W   | No  | No  |
| CAGL0K03619g | Ortholog(s) have structural constituent of cytoskeleton activity, role in chromosome segregation, microtubule nucleation and Ndc80 complex, condensed nuclear chromosome kinetochore localization                                             | YMR117C   | No  | Yes |
| CAGL0K03729g | Ortholog(s) have mRNA binding activity                                                                                                                                                                                                        | YMR125W   | No  | No  |
| CAGL0K03861g | Ortholog(s) have role in ribosome biogenesis and cytosol, nucleolus localization                                                                                                                                                              | YMR131C   | No  | No  |
| CAGL0K03905g | Ortholog(s) have role in reciprocal meiotic recombination and condensed nuclear chromosome localization                                                                                                                                       | YMR133W   | No  | No  |
| CAGL0K03971g | Ortholog(s) have role in protein targeting to mitochondrion and mitochondrial outer membrane, peroxisomal membrane localization                                                                                                               | YGR028W   | No  | Yes |
| CAGL0K04125g | Ortholog(s) have long-chain fatty acid transporter activity, role in chronological cell aging, long-chain fatty acid transport and cytosol, extracellular region, nucleus localization                                                        | YGR037C   | Yes | No  |
| CAGL0K04169g | Ortholog(s) have MAP kinase activity, transcription factor binding activity                                                                                                                                                                   | YGR040W   | No  | No  |
| CAGL0K04543g | Ortholog(s) have rDNA binding activity                                                                                                                                                                                                        | YGR063C   | No  | No  |
| CAGL0K04543g | Ortholog(s) have rDNA binding activity                                                                                                                                                                                                        | YGR064W   | No  | -   |
| CAGL0K04587g | Ortholog(s) have structural constituent of ribosome activity and cytosolic small ribosomal subunit, nucleus localization                                                                                                                      | YLR367W   | No  | No  |
| CAGL0H04873g | Ortholog(s) have sequence-specific DNA binding activity, role in filamentous growth and nucleus localization                                                                                                                                  | YDL048C   | No  | Yes |
| CAGL0K04917g | Putative transcriptional regulator, complements lethality of S. cerevisiae rap1 mutant                                                                                                                                                        | YNL216W   | No  | No  |
| CAGL0K04939g | Ortholog(s) have fungal-type vacuole localization                                                                                                                                                                                             | YNL217W   | No  | Yes |
| CAGL0K05049g | Ortholog(s) have ribonuclease MRP activity, ribonuclease P activity, tRNA binding activity and role in intronic box C/D snoRNA processing, mRNA cleavage, rRNA processing, tRNA processing                                                    | YNL221C   | No  | No  |
| CAGL0K05093g | Ortholog(s) have ATP-dependent peptidase activity                                                                                                                                                                                             | YPR024W   | Yes | No  |
| CAGL0K05203g | Ortholog(s) have role in cellular protein localization, endoplasmic reticulum inheritance, endoplasmic reticulum tubular network organization, mitotic cytokinesis, site selection, nuclear pore complex assembly, vesicle-mediated transport | YPR028W   | No  | Yes |
| CAGL0K05269g | Ortholog(s) have methylated histone binding activity, role in histone acetylation and NuA3a histone acetyltransferase complex, NuA3b histone acetyltransferase complex, cytoplasm localization                                                | YPR031W   | No  | No  |
| CAGL0K05335g | Ortholog(s) have DNA translocase activity                                                                                                                                                                                                     | YPR034W   | Yes | No  |
| CAGL0K05445g | Ortholog(s) have role in centromere complex assembly, establishment of protein localization to chromosome, kinetochore organization and maintenance of meiotic sister chromatid cohesion, more                                                | YOR073W   | No  | Yes |
| CAGL0K05489g | Ortholog(s) have SNAP receptor activity, role in endoplasmic reticulum membrane fusion, retrograde vesicle-mediated transport, Golgi to ER and SNARE complex, endoplasmic reticulum localization                                              | YOR075W   | No  | Yes |
| CAGL0K05813g | Ortholog(s) have glutathione disulfide oxidoreductase activity, glutathione peroxidase activity, glutathione transferase activity and role in glutathione metabolic process, pathogenesis, removal of superoxide radicals                     | YDR513W   | No  | No  |
| CAGL0K05995g | Putative sphingoid long-chain base kinase; gene is upregulated in azole-resistant strain                                                                                                                                                      | YLR260W   | Yes | Yes |

|              |                                                                                                                                                                                                                                 |           |     |     |
|--------------|---------------------------------------------------------------------------------------------------------------------------------------------------------------------------------------------------------------------------------|-----------|-----|-----|
| CAGL0K06061g | Ortholog(s) have structural constituent of ribosome activity                                                                                                                                                                    | YLR264W   | No  | No  |
| CAGL0K06325g | Ortholog(s) have role in attachment of telomere to nuclear envelope, maintenance of rDNA, mitotic sister chromatid segregation, nuclear inner membrane organization                                                             | YDR458C   | No  | No  |
| CAGL0K08360g | Ortholog(s) have double-stranded DNA 5'-3' exodeoxyribonuclease activity, single-stranded DNA endodeoxyribonuclease activity, tRNA (m5U54) methyltransferase activity and role in double-strand break repair, tRNA modification | YKR056W   | Yes | No  |
| CAGL0K08382g | Ortholog(s) have structural constituent of ribosome activity                                                                                                                                                                    | YKR057W   | No  | Yes |
| CAGL0K08558g | Ortholog(s) have role in establishment or maintenance of cell polarity and cytosol localization                                                                                                                                 | YMR084W   | No  | No  |
| CAGL0K08800g | Ortholog(s) have acireductone dioxygenase (Ni2+-requiring) activity, role in L-methionine biosynthetic process from methylthioadenosine and cytosol, nucleus localization                                                       | YMR009W   | No  | Yes |
| CAGL0K08844g | Ortholog(s) have gamma-butyrobetaine dioxygenase activity, role in carnitine biosynthetic process, mitochondrion organization and mitochondrion localization                                                                    | YHL021C   | No  | Yes |
| CAGL0K08888g | Ortholog(s) have guanyl-nucleotide exchange factor activity, translation initiation factor activity and role in negative regulation of cellular response to amino acid starvation, regulation of translational initiation       | YOR260W   | No  | No  |
| CAGL0K08976g | Has domain(s) with predicted peptidase activity and role in proteolysis                                                                                                                                                         | YOR256C   | No  | No  |
| CAGL0K09504g | Ortholog(s) have ATPase activator activity, role in mRNA splicing, via spliceosome, positive regulation of ATPase activity and spliceosomal complex localization                                                                | YOR148C   | Yes | No  |
| CAGL0K09614g | Ortholog(s) have role in negative regulation of G0 to G1 transition, ribosomal small subunit biogenesis and 90S preribosome, nucleolus localization                                                                             | YNL132W   | No  | No  |
| CAGL0K09724g | Peptidyl-prolyl cis-trans isomerase; expression upregulated in biofilm vs planktonic cell culture                                                                                                                               | YNL135C   | No  | No  |
| CAGL0K09966g | Translation initiation factor eIF3 subunit                                                                                                                                                                                      | YOR361C   | No  | No  |
| CAGL0K10054g | Ortholog(s) have RNA polymerase II core promoter proximal region sequence-specific DNA binding activity                                                                                                                         | YDR081C   | No  | No  |
| CAGL0K10626g | Ortholog(s) have glycogen (starch) synthase activity                                                                                                                                                                            | YFR015C   | No  | Yes |
| CAGL0K10868g | Putative catalase A; gene is downregulated in azole-resistant strain; regulated by oxidative stress and glucose starvation                                                                                                      | YGR088W   | No  | No  |
| CAGL0K10906g | Ortholog(s) have RNA binding, structural constituent of ribosome activity, role in cytoplasmic translation and cytosolic large ribosomal subunit localization                                                                   | YPL249C-A | Yes | No  |
| CAGL0K10956g | Ortholog(s) have role in mitochondrial respiratory chain complex IV assembly, negative regulation of mitochondrial translation                                                                                                  | YML129C   | No  | No  |
| CAGL0K10978g | Ortholog(s) have homoaconitate hydratase activity, role in lysine biosynthetic process via aminoadipic acid and mitochondrion localization                                                                                      | YDR234W   | No  | Yes |
| CAGL0K11088g | Ortholog(s) have role in ER to Golgi vesicle-mediated transport and COPI vesicle coat, cytosol, plasma membrane localization                                                                                                    | YDR238C   | No  | No  |
| CAGL0K11440g | Ortholog(s) have role in DNA damage induced protein phosphorylation, DNA repair, protein localization to kinetochore, signal transduction in response to DNA damage, transfer RNA gene-mediated silencing                       | YDR225W   | Yes | No  |
| CAGL0K11506g | Ortholog(s) have 5'-flap endonuclease activity, single-stranded DNA 5'-3' exodeoxyribonuclease activity                                                                                                                         | YKL113C   | No  | Yes |
| CAGL0K12914g | Ortholog(s) have glycoprotein binding activity, role in ER to Golgi vesicle-mediated transport and ER to Golgi transport vesicle, Golgi membrane localization                                                                   | YFL048C   | No  | No  |
| CAGL0L00429g | Ortholog(s) have glycine dehydrogenase (decarboxylating) activity, role in glycine decarboxylation via glycine cleavage system, one-carbon metabolic process and mitochondrion localization                                     | YMR189W   | Yes | No  |
| CAGL0L00495g | Putative heat shock protein                                                                                                                                                                                                     | YMR186W   | No  | No  |
| CAGL0L00803g | Ortholog(s) have role in regulation of glycogen biosynthetic process and cytoplasm localization                                                                                                                                 | YIL045W   | Yes | Yes |
| CAGL0L00935g | Ortholog(s) have role in cellular lipid metabolic process, mRNA export from nucleus, nuclear envelope organization and endoplasmic reticulum, nuclear envelope localization                                                     | YIL040W   | No  | No  |
| CAGL0L01309g | Ortholog(s) have damaged DNA binding, peptide-N4-(N-acetyl-beta-glucosaminy)asparagine amidase activity, proteasome binding, protein binding, bridging, ubiquitin binding activity                                              | YEL037C   | No  | No  |
| CAGL0L01353g | Ortholog(s) have cytosol, nucleolus localization                                                                                                                                                                                | YEL034W   | Yes | No  |
| CAGL0L02057g | Ortholog(s) have RNA polymerase II core binding, TFIIF-class transcription factor binding, single-stranded DNA binding activity and role in transcriptional open complex formation at RNA polymerase II promoter                | YKL028W   | No  | No  |
| CAGL0L02673g | Ortholog(s) have DNA clamp loader activity, role in leading strand elongation, mismatch repair, mitotic DNA replication and DNA replication factor C complex, Elg1 RFC-like complex, nucleus localization                       | YOR217W   | No  | Yes |
| CAGL0L02871g | Ortholog(s) have mRNA binding activity                                                                                                                                                                                          | YOR206W   | No  | No  |

|              |                                                                                                                                                                                                                                                 |         |     |     |
|--------------|-------------------------------------------------------------------------------------------------------------------------------------------------------------------------------------------------------------------------------------------------|---------|-----|-----|
| CAGL0L03960g | Ortholog(s) have ubiquitin-protein transferase activity                                                                                                                                                                                         | YNL116W | Yes | No  |
| CAGL0L04004g | Ortholog(s) have chromatin binding, m7G(5')pppN diphosphatase activity, mRNA binding activity                                                                                                                                                   | YNL118C | Yes | No  |
| CAGL0L04092g | Ortholog(s) have serine-type peptidase activity, role in apoptotic process, cellular lipid metabolic process, cellular response to heat, protein catabolic process and nucleus localization                                                     | YNL123W | No  | No  |
| CAGL0L04136g | Ortholog(s) have structural constituent of cytoskeleton activity                                                                                                                                                                                | YNL126W | No  | No  |
| CAGL0L04158g | Ortholog(s) have role in ascospore formation, intra-S DNA damage checkpoint, positive regulation of macroautophagy, re-entry into mitotic cell cycle after pheromone arrest and regulation of meiosis I, more                                   | YNL127W | No  | No  |
| CAGL0L04818g | Ortholog(s) have cytoplasm localization                                                                                                                                                                                                         | YGR117C | No  | No  |
| CAGL0L05522g | Ortholog(s) have COPI-coated vesicle, Golgi apparatus, cytosol, ribosome localization                                                                                                                                                           | YJL123C | No  | Yes |
| CAGL0L06160g | Ortholog(s) have cytochrome-c oxidase activity, zinc ion binding activity and role in aerobic respiration, mitochondrial electron transport, cytochrome c to oxygen                                                                             | YGL187C | No  | No  |
| CAGL0L06292g | Ortholog(s) have role in vesicle-mediated transport and COPI-coated vesicle, integral component of Golgi membrane localization                                                                                                                  | YDR100W | No  | Yes |
| CAGL0L06402g | Ortholog(s) have bilirubin transmembrane transporter activity, glutathione S-conjugate-exporting ATPase activity, phytochelatin transmembrane transporter activity                                                                              | YDR135C | No  | No  |
| CAGL0L07480g | Ortholog(s) have RNA polymerase II core promoter proximal region sequence-specific DNA binding, more                                                                                                                                            | YBR066C | No  | No  |
| CAGL0L07634g | No Description Available                                                                                                                                                                                                                        | YML002W | No  | No  |
| CAGL0L08404g | Ortholog(s) have role in mRNA cis splicing, via spliceosome and U2-type spliceosomal complex, cytosol localization                                                                                                                              | YPR152C | No  | No  |
| CAGL0L09603g | Ortholog(s) have role in attachment of spindle microtubules to kinetochore involved in meiotic sister chromatid segregation and nuclear MIS12/MIND complex, spindle pole localization                                                           | YIR010W | No  | Yes |
| CAGL0L09955g | No Description Available                                                                                                                                                                                                                        | YOR043W | Yes | No  |
| CAGL0L10015g | Ortholog(s) have protein channel activity, role in mitochondrial outer membrane translocase complex assembly, protein import into mitochondrial matrix and mitochondrial outer membrane translocase complex localization                        | YOR045W | No  | No  |
| CAGL0L10120g | Ortholog(s) have 5'-3' exoribonuclease activity, mRNA binding, microtubule binding, recombinase activity                                                                                                                                        | YOR048C | No  | No  |
| CAGL0L10164g | Ortholog(s) have role in translational termination and nucleus localization                                                                                                                                                                     | YOR051C | No  | No  |
| CAGL0L10252g | Ortholog(s) have microtubule binding activity and role in cell separation after cytokinesis, microtubule bundle formation, mitotic spindle elongation, mitotic spindle stabilization, spindle midzone assembly, spindle pole body separation    | YOR058C | No  | No  |
| CAGL0L10428g | Protein of unknown function                                                                                                                                                                                                                     | YOR066W | No  | Yes |
| CAGL0L11110g | Catalytic subunit of calcineurin, calcium/calmodulin-dependent Ser/Thr-specific protein phosphatase; regulates stress-responding transcription factor Crz1p; involved in thermotolerance, response to ER stress, cell wall integrity, virulence | YLR433C | No  | No  |
| CAGL0L11132g | Protein of unknown function                                                                                                                                                                                                                     | YLR437C | Yes | Yes |
| CAGL0L11616g | Ortholog(s) have cytoplasm localization                                                                                                                                                                                                         | YOR118W | No  | No  |
| CAGL0L12166g | Ortholog(s) have nucleosome binding activity, role in chromatin silencing at telomere, histone exchange and Swr1 complex, cytosol, nuclear chromosome, telomeric region localization                                                            | YLR085C | No  | No  |
| CAGL0L12408g | Ortholog(s) have tRNA (uracil) methyltransferase activity, role in tRNA methylation and cytosol, nucleus localization                                                                                                                           | YPL030W | No  | No  |
| CAGL0L12452g | Has domain(s) with predicted NADP binding, coenzyme binding, oxidoreductase activity, oxidoreductase activity, acting on the CH-OH group of donors, NAD or NADP as acceptor activity and role in oxidation-reduction process                    | YPL032C | Yes | No  |
| CAGL0L12650g | Ortholog(s) have RNA polymerase II carboxy-terminal domain kinase activity, cyclin-dependent protein serine/threonine kinase activity                                                                                                           | YPL042C | No  | No  |
| CAGL0L12672g | Ortholog(s) have mRNA binding activity, role in cellular response to drug, maturation of LSU-rRNA from tricistronic rRNA transcript (SSU-rRNA, 5.8S rRNA, LSU-rRNA) and nucleolus, preribosome, large subunit precursor localization            | YPL043W | No  | No  |
| CAGL0L12672g | Ortholog(s) have mRNA binding activity, role in cellular response to drug, maturation of LSU-rRNA from tricistronic rRNA transcript (SSU-rRNA, 5.8S rRNA, LSU-rRNA) and nucleolus, preribosome, large subunit precursor localization            | YPL044C | No  | -   |
| CAGL0L12694g | Ortholog(s) have phosphatidylinositol binding activity                                                                                                                                                                                          | YPL045W | No  | No  |
| CAGL0L12870g | Ortholog(s) have role in cellular response to oxidative stress, cytoplasmic translation and cytosol, mitochondrion, nucleus, ribosome localization                                                                                              | YKL056C | No  | No  |
| CAGL0L12936g | Ortholog(s) have mitochondrion localization                                                                                                                                                                                                     | YHR117W | Yes | No  |

|              |                                                                                                                                                                                                                                            |           |     |     |
|--------------|--------------------------------------------------------------------------------------------------------------------------------------------------------------------------------------------------------------------------------------------|-----------|-----|-----|
| CAGL0L12980g | Ortholog(s) have RNA binding, histone methyltransferase activity (H3-K4 specific) activity                                                                                                                                                 | YHR119W   | No  | No  |
| CAGL0L13112g | Ortholog(s) have RNA polymerase II repressing transcription factor binding activity and role in negative regulation of transcription from RNA polymerase II promoter, positive regulation of transcription from RNA polymerase II promoter | YLR071C   | No  | No  |
| CAGL0M00418g | Ortholog(s) have protein transporter activity, role in protein import into mitochondrial inner membrane and cytosol, mitochondrial intermembrane space protein transporter complex localization                                            | YJR135W-A | No  | No  |
| CAGL0M00506g | Ortholog(s) have protein transporter activity, role in protein import into nucleus and cytosol, nuclear envelope, nuclear periphery localization                                                                                           | YJR132W   | No  | No  |
| CAGL0M01892g | No Description Available                                                                                                                                                                                                                   | YBR076W   | Yes | No  |
| CAGL0M01936g | Ortholog(s) have cytosol, fungal-type vacuole membrane localization                                                                                                                                                                        | YBR075W   | No  | -   |
| CAGL0M02277g | Ortholog(s) have role in mRNA splicing, via spliceosome and Prp19 complex, spliceosomal complex localization                                                                                                                               | YPL151C   | No  | No  |
| CAGL0M02409g | Ortholog(s) have rRNA binding activity, role in maturation of LSU-rRNA from tricistronic rRNA transcript (SSU-rRNA, 5.8S rRNA, LSU-rRNA), ribosomal large subunit export from nucleus and nucleolus localization                           | YPL146C   | No  | No  |
| CAGL0M02497g | Ortholog(s) have structural constituent of ribosome activity, role in cytoplasmic translation and cytosolic large ribosomal subunit localization                                                                                           | YOR234C   | Yes | No  |
| CAGL0M02497g | Ortholog(s) have structural constituent of ribosome activity, role in cytoplasmic translation and cytosolic large ribosomal subunit localization                                                                                           | YPL142C   | Yes | -   |
| CAGL0M02519g | Ortholog(s) have protein kinase activity, role in protein phosphorylation and cytoplasm localization                                                                                                                                       | YPL141C   | No  | Yes |
| CAGL0M02959g | Ortholog(s) have CTD phosphatase activity and role in dephosphorylation of RNA polymerase II C-terminal domain, negative regulation of G0 to G1 transition, regulation of mitotic cytokinesis                                              | YMR277W   | No  | No  |
| CAGL0M03003g | Ortholog(s) have role in borate transmembrane transport and endoplasmic reticulum localization                                                                                                                                             | YMR279C   | No  | Yes |
| CAGL0M03531g | Ortholog(s) have role in ER to Golgi vesicle-mediated transport, retrograde vesicle-mediated transport, Golgi to ER and COPI vesicle coat, cytosol, endosome localization                                                                  | YNL287W   | No  | No  |
| CAGL0M03597g | Putative calcium transporter; putative regulatory subunit of a plasma membrane gated channel involved in Ca <sup>2+</sup> uptake; required for viability upon prolonged fluconazole stress                                                 | YNL291C   | No  | No  |
| CAGL0M03729g | Ortholog(s) have role in ascospore formation, conidiophore development, conidium formation, hyphal growth, sporocarp development involved in sexual reproduction and mitochondrion localization                                            | YNL298W   | No  | No  |
| CAGL0M03971g | Ortholog(s) have role in cellular protein catabolic process, regulation of sulfur amino acid metabolic process and SCF ubiquitin ligase complex, ribosome localization                                                                     | YNL311C   | No  | No  |
| CAGL0M04235g | Ortholog(s) have ubiquitin-protein transferase activity                                                                                                                                                                                    | YLR127C   | No  | No  |
| CAGL0M04279g | Ortholog(s) have snoRNA binding activity                                                                                                                                                                                                   | YLR129W   | No  | No  |
| CAGL0M04323g | Putative transcription factor; null mutation results in hypervirulence in immunocompromised mice                                                                                                                                           | YLR131C   | No  | Yes |
| CAGL0M04631g | Putative spliceosome component; gene is upregulated in azole-resistant strain                                                                                                                                                              | YLR147C   | Yes | No  |
| CAGL0M04675g | Ortholog(s) have thiosulfate sulfurtransferase activity and endoplasmic reticulum, mitochondrial outer membrane localization                                                                                                               | YOR285W   | No  | Yes |
| CAGL0M04829g | Ortholog(s) have mRNA binding, poly(U) RNA binding activity                                                                                                                                                                                | YMR229C   | No  | Yes |
| CAGL0M04895g | Ortholog(s) have phosphatidylinositol binding, ubiquitin-protein transferase activity                                                                                                                                                      | YMR231W   | No  | No  |
| CAGL0M04961g | Ortholog(s) have GTPase activator activity                                                                                                                                                                                                 | YMR235C   | No  | No  |
| CAGL0M05907g | Ortholog(s) have role in cellular response to oleic acid, negative regulation of transcription from RNA polymerase II promoter and mitochondrion, nucleus localization                                                                     | YKR064W   | No  | No  |
| CAGL0M05929g | Ortholog(s) have role in protein import into mitochondrial matrix and plasma membrane, presequence translocase-associated import motor localization                                                                                        | YKR065C   | No  | No  |
| CAGL0M06083g | Heat shock protein of HSP70 family                                                                                                                                                                                                         | YBR169C   | No  | No  |
| CAGL0M06237g | Ortholog(s) have alcohol O-octanoyltransferase activity, short-chain carboxylesterase activity and role in medium-chain fatty acid biosynthetic process                                                                                    | YPL095C   | Yes | No  |
| CAGL0M06369g | Ortholog(s) have histone acetyltransferase activity, role in regulation of transcription from RNA polymerase II promoter, tRNA wobble uridine modification and Elongator holoenzyme complex, cytosol, nucleus localization                 | YPL086C   | No  | No  |
| CAGL0M06413g | Ortholog(s) have deubiquitinase activator activity                                                                                                                                                                                         | YPL084W   | No  | No  |
| CAGL0M06633g | Ortholog(s) have mitochondrion localization                                                                                                                                                                                                | YIL087C   | No  | No  |
| CAGL0M06787g | Ortholog(s) have cytosol, nucleus localization                                                                                                                                                                                             | YIL085C   | No  | No  |

|              |                                                                                                                                                                                                                                          |           |     |     |
|--------------|------------------------------------------------------------------------------------------------------------------------------------------------------------------------------------------------------------------------------------------|-----------|-----|-----|
| CAGL0M06919g | Ortholog(s) have Golgi apparatus, cytosol localization                                                                                                                                                                                   | YNL023C   | No  | No  |
| CAGL0M07001g | Protein of unknown function                                                                                                                                                                                                              | YNR034W-A | No  | No  |
| CAGL0M07051g | Ortholog(s) have exoribonuclease II activity, role in mitochondrial RNA catabolic process and mitochondrial degradosome localization                                                                                                     | YMR287C   | No  | No  |
| CAGL0M07227g | Ortholog(s) have snoRNA binding activity and role in maturation of SSU-rRNA from tricistronic rRNA transcript (SSU-rRNA, 5.8S rRNA, LSU-rRNA), positive regulation of transcription from RNA polymerase I promoter                       | YHR196W   | No  | No  |
| CAGL0M07271g | Ortholog(s) have glutathione disulfide oxidoreductase activity, role in cellular response to oxidative stress, response to osmotic stress and mitochondrial matrix localization                                                          | YPL059W   | No  | No  |
| CAGL0M07337g | Ortholog(s) have role in histone methylation, histone ubiquitination, premeiotic DNA replication, protein monoubiquitination, regulation of cell size and nucleus localization                                                           | YPL055C   | No  | Yes |
| CAGL0M07722g | Ortholog(s) have mRNA binding activity, role in cytoplasmic translational initiation and eukaryotic translation initiation factor 3 complex localization                                                                                 | YMR012W   | No  | Yes |
| CAGL0M08074g | Ortholog(s) have role in hexose catabolic process                                                                                                                                                                                        | YJR030C   | No  | No  |
| CAGL0M08514g | Pir protein family member, predicted GPI-anchor                                                                                                                                                                                          | YOL105C   | No  | No  |
| CAGL0M08668g | Ortholog(s) have ubiquitin-protein transferase activity, role in histone catabolic process, histone ubiquitination and cytoplasm, ribosome localization                                                                                  | YDR266C   | No  | No  |
| CAGL0M08712g | Ortholog(s) have Golgi apparatus, fungal-type vacuole membrane localization                                                                                                                                                              | YDR264C   | No  | No  |
| CAGL0M08756g | Putative exo-1,3-beta-glucanase; predicted GPI-anchor                                                                                                                                                                                    | YDR261C   | No  | No  |
| CAGL0M09229g | Ortholog(s) have endoplasmic reticulum, mitochondrion localization                                                                                                                                                                       | YJR085C   | No  | No  |
| CAGL0M10241g | Ortholog(s) have RNA binding activity and cytosolic large ribosomal subunit, nucleus localization                                                                                                                                        | YHL001W   | Yes | No  |
| CAGL0M10571g | Ortholog(s) have ergosterol O-acyltransferase activity, role in ergosterol metabolic process and endoplasmic reticulum localization                                                                                                      | YCR050C   | No  | No  |
| CAGL0M10703g | Ortholog(s) have Sar guanyl-nucleotide exchange factor activity, role in regulation of COPII vesicle coating and Golgi apparatus, endoplasmic reticulum localization                                                                     | YNR026C   | No  | No  |
| CAGL0M10934g | Ortholog(s) have 4-amino-4-deoxychorismate synthase activity, role in para-aminobenzoic acid biosynthetic process and cytosol, nucleus localization                                                                                      | YNR033W   | No  | No  |
| CAGL0M11264g | Ortholog(s) have role in RNA polymerase II transcriptional preinitiation complex assembly and transcription factor TFIIID complex localization                                                                                           | YMR227C   | No  | No  |
| CAGL0M11396g | Ortholog(s) have protein serine/threonine kinase activity                                                                                                                                                                                | YLR096W   | No  | No  |
| CAGL0M11440g | Ortholog(s) have sequence-specific DNA binding, sequence-specific DNA binding transcription factor activity, role in cellular amino acid catabolic process, positive regulation of transcription, DNA-templated and nucleus localization | YLR098C   | No  | No  |
| CAGL0M11462g | Ortholog(s) have lysophosphatidic acid acyltransferase activity and role in phosphatidic acid biosynthetic process                                                                                                                       | YLR099C   | Yes | Yes |
| CAGL0M11726g | Putative GPI-linked cell wall adhesin-like protein                                                                                                                                                                                       | YLR110C   | Yes | No  |
| CAGL0M11726g | Putative GPI-linked cell wall adhesin-like protein                                                                                                                                                                                       | YDR133C   | Yes | -   |
| CAGL0M12386g | Ortholog(s) have role in isoleucine biosynthetic process, mitochondrial genome maintenance, mitochondrial translation and cytosol, mitochondrial matrix, nucleus localization                                                            | YER057C   | No  | No  |
| CAGL0M12430g | Putative DL-glycerol phosphatase                                                                                                                                                                                                         | YER062C   | No  | Yes |
| CAGL0M12705g | Ortholog(s) have GTPase regulator activity, mRNA binding activity                                                                                                                                                                        | YER072W   | Yes | No  |
| CAGL0M12793g | Ortholog(s) have cytoplasm, nucleus localization                                                                                                                                                                                         | YER079W   | No  | No  |
| CAGL0M13255g | Ortholog(s) have ribosome localization                                                                                                                                                                                                   | YKL065C   | No  | No  |
| CAGL0M13255g | Ortholog(s) have ribosome localization                                                                                                                                                                                                   | YMR040W   | No  | No  |
| CAGL0M13519g | Ortholog(s) have ATP-dependent RNA helicase activity, RNA binding activity                                                                                                                                                               | YMR290C   | Yes | Yes |
| CAGL0M13871g | Ortholog(s) have nuclear localization sequence binding, protein transporter activity and role in mRNA export from nucleus, protein import into nucleus, regulation of mitotic nuclear division, regulation of protein desumoylation      | YMR308C   | No  | No  |
| CAGL0M13893g | Ortholog(s) have mRNA binding, translation initiation factor activity, translation initiation factor binding activity and role in cellular response to drug, translational initiation                                                    | YMR309C   | No  | No  |

### Acetic acid-responsive genes regulated by CgHaa1 only

| ORF | Function | <i>S. cerevisiae</i><br>orthologue | <i>C. glabrata</i><br>promoter harbors<br>an HRE motif | <i>S. cerevisiae</i><br>promoter harbors<br>an HRE motif |
|-----|----------|------------------------------------|--------------------------------------------------------|----------------------------------------------------------|
|-----|----------|------------------------------------|--------------------------------------------------------|----------------------------------------------------------|



|              |                                                                                                                                                                                                                                         |           |     |     |
|--------------|-----------------------------------------------------------------------------------------------------------------------------------------------------------------------------------------------------------------------------------------|-----------|-----|-----|
| CAGL0A00495g | Putative plasma membrane proton pump with a predicted role in pH homeostasis                                                                                                                                                            | YGL008C   | No  | No  |
| CAGL0A00539g | Ortholog(s) have role in CVT pathway, intra-Golgi vesicle-mediated transport and Golgi transport complex, mitochondrion localization                                                                                                    | YGL005C   | No  | No  |
| CAGL0A01650g | Putative protein; gene is upregulated in azole-resistant strain                                                                                                                                                                         | YGR146C   | Yes | No  |
| CAGL0A01716g | Ortholog(s) have nicotinamidase activity, role in chromatin silencing at rDNA, chromatin silencing at telomere, replicative cell aging and cytosol, nucleus, peroxisome localization                                                    | YGL037C   | No  | Yes |
| CAGL0A01782g | Ortholog(s) have glucose transmembrane transporter activity, pentose transmembrane transporter activity and plasma membrane localization                                                                                                | YHR092C   | Yes | No  |
| CAGL0A01804g | Ortholog(s) have fructose transmembrane transporter activity, pentose transmembrane transporter activity, role in glucose transport, mannose transport and plasma membrane localization                                                 | YHR094C   | No  | No  |
| CAGL0A01870g | Has domain(s) with predicted integral to membrane localization                                                                                                                                                                          | YBL017C   | No  | Yes |
| CAGL0A02145g | Ortholog(s) have actin filament binding activity, role in actin cortical patch localization, actin filament bundle assembly, endocytosis and actin cortical patch localization                                                          | YHR016C   | No  | No  |
| CAGL0A03102g | Ortholog(s) have phenylpyruvate decarboxylase activity                                                                                                                                                                                  | YDR380W   | Yes | Yes |
| CAGL0A03872g | Ortholog(s) have phosphatidylinositol-4,5-bisphosphate binding activity, role in actin cortical patch assembly, actin filament organization, endocytosis and actin cortical patch, mating projection tip localization                   | YLR206W   | No  | Yes |
| CAGL0B00264g | Homeobox-domain protein alpha2                                                                                                                                                                                                          | YCL067C   | No  | No  |
| CAGL0B00902g | Phosphoribosyl-AMP cyclohydrolase; phosphoribosyl-ATP pyrophosphatase; histidinol dehydrogenase                                                                                                                                         | YCL030C   | No  | No  |
| CAGL0B01265g | Mating-type regulatory protein alpha2; expressed in all MTLalpha strains and not in MTLalpha strains                                                                                                                                    | YCR039C   | No  | No  |
| CAGL0B01595g | No Description Available                                                                                                                                                                                                                | -         | Yes | -   |
| CAGL0B01875g | Ortholog(s) have mitochondrial inner membrane localization                                                                                                                                                                              | YDR119W-A | No  | Yes |
| CAGL0B02431g | Ortholog(s) have NADH dehydrogenase (ubiquinone) activity and role in NADH oxidation, chronological cell aging, mitochondrial electron transport, NADH to ubiquinone, positive regulation of apoptotic process                          | YML120C   | No  | Yes |
| CAGL0B02475g | Ortholog(s) have inorganic phosphate transmembrane transporter activity, manganese ion transmembrane transporter activity and role in manganese ion transport, phosphate ion transport, polyphosphate metabolic process                 | YML123C   | Yes | Yes |
| CAGL0B02755g | No Description Available                                                                                                                                                                                                                | YLR361C-A | No  | Yes |
| CAGL0B03421g | Has domain(s) with predicted DNA binding, sequence-specific DNA binding RNA polymerase II transcription factor activity, zinc ion binding activity and role in regulation of transcription, DNA-dependent, transcription, DNA-dependent | YLR256W   | Yes | No  |
| CAGL0B03817g | Ortholog(s) have cytosol, nucleus localization                                                                                                                                                                                          | YJR008W   | No  | No  |
| CAGL0B04675g | No Description Available                                                                                                                                                                                                                | YCL001W-B | No  | No  |
| CAGL0B04895g | Ortholog(s) have RNA polymerase II core promoter proximal region sequence-specific DNA binding activity                                                                                                                                 | YLR176C   | No  | Yes |
| CAGL0C00275g | Putative cysteine protease; protein differentially expressed in azole resistant strain; gene is upregulated in azole-resistant strain                                                                                                   | YDR533C   | No  | Yes |
| CAGL0C00319g | Ortholog(s) have carboxypeptidase activity, role in nitrogen compound metabolic process, proteolysis involved in cellular protein catabolic process and fungal-type vacuole lumen localization                                          | YJL172W   | No  | No  |
| CAGL0C01397g | Has domain(s) with predicted 6-phosphofructo-2-kinase activity, ATP binding, catalytic activity and role in fructose 2,6-bisphosphate metabolic process, fructose metabolic process                                                     | YIL107C   | Yes | Yes |
| CAGL0C01551g | Has domain(s) with predicted DNA binding, sequence-specific DNA binding, sequence-specific DNA binding transcription factor activity and role in regulation of transcription, DNA-dependent                                             | YPL177C   | No  | Yes |
| CAGL0C01595g | Ortholog(s) have imidazoleglycerol-phosphate synthase activity, role in histidine biosynthetic process and cytosol, nucleus localization                                                                                                | YBR248C   | No  | No  |
| CAGL0C01771g | Ortholog(s) have role in protein targeting to vacuole and mitochondrion localization                                                                                                                                                    | YGL104C   | No  | No  |
| CAGL0C02365g | No Description Available                                                                                                                                                                                                                | -         | No  | -   |
| CAGL0C02519g | Has domain(s) with predicted nucleic acid binding activity                                                                                                                                                                              | YER028C   | Yes | No  |
| CAGL0C03267g | Glycerol transporter; 1 of 2 Fps1 orthologs in <i>C. glabrata</i> ; double fps1/fps2 mutant accumulates glycerol, has constitutive cell wall stress, is hypersensitive to caspofungin in vitro and in vivo                              | YLL043W   | Yes | Yes |
| CAGL0C03289g | Putative ABC transporter involved in bile acid transport; gene is upregulated in azole-resistant strain                                                                                                                                 | YLL048C   | Yes | No  |

|              |                                                                                                                                                                                                                                 |           |     |     |
|--------------|---------------------------------------------------------------------------------------------------------------------------------------------------------------------------------------------------------------------------------|-----------|-----|-----|
| CAGL0C03740g | Ortholog(s) have sequence-specific DNA binding, sequence-specific DNA binding transcription factor activity                                                                                                                     | YEL007W   | Yes | Yes |
| CAGL0C03872g | Putative GPI-linked cell wall protein involved in sterol uptake                                                                                                                                                                 | YIL011W   | Yes | Yes |
| CAGL0C04213g | Ortholog(s) have role in vesicle-mediated transport and fungal-type vacuole, vesicle localization                                                                                                                               | YDR003W   | No  | No  |
| CAGL0C04323g | Ortholog(s) have alpha,alpha-trehalase activity, role in trehalose catabolic process and cytoplasm localization                                                                                                                 | YDR001C   | No  | Yes |
| CAGL0C04785g | No Description Available                                                                                                                                                                                                        | YJR115W   | Yes | Yes |
| CAGL0C05027g | Has domain(s) with predicted transferase activity, transferring acyl groups activity                                                                                                                                            | YAR035W   | Yes | Yes |
| CAGL0C05533g | Has domain(s) with predicted phosphoric diester hydrolase activity and role in lipid metabolic process                                                                                                                          | YDL237W   | No  | No  |
| CAGL0D00286g | Beta mannosyltransferase                                                                                                                                                                                                        | -         | No  | -   |
| CAGL0D01100g | Ortholog(s) have 6-phosphofructo-2-kinase activity and role in fructose 2,6-bisphosphate metabolic process                                                                                                                      | YIL107C   | No  | Yes |
| CAGL0D01276g | Ortholog(s) have role in cell cycle arrest in response to pheromone, establishment of protein localization to plasma membrane, fungal-type cell wall biogenesis and osmosensory signaling pathway, more                         | YPR075C   | No  | No  |
| CAGL0D01298g | Putative transketolase                                                                                                                                                                                                          | YPR074C   | Yes | Yes |
| CAGL0D01474g | Ortholog(s) have role in actin cortical patch assembly and actin cortical patch, membrane raft localization                                                                                                                     | YBR108W   | No  | No  |
| CAGL0D01980g | Ortholog(s) have sterol esterase activity, role in cellular lipid metabolic process, sterol metabolic process and integral to membrane, lipid particle localization                                                             | YKL140W   | No  | No  |
| CAGL0D02948g | Protein with a predicted role in nuclear fusion                                                                                                                                                                                 | YJL034W   | Yes | Yes |
| CAGL0D04026g | Ortholog(s) have 4-aminobutyrate transaminase activity, pyridoxal phosphate binding activity, role in gamma-aminobutyric acid catabolic process, glutamate metabolic process and cytosol localization                           | YGR019W   | No  | No  |
| CAGL0D04422g | Ortholog(s) have endoplasmic reticulum localization                                                                                                                                                                             | YPL279C   | Yes | Yes |
| CAGL0D04510g | No Description Available                                                                                                                                                                                                        | YPR117W   | Yes | No  |
| CAGL0D05566g | Ortholog(s) have sterol esterase activity, role in cell wall mannoprotein biosynthetic process, sterol metabolic process and integral to membrane, plasma membrane localization                                                 | YLR020C   | Yes | No  |
| CAGL0E01353g | Putative high-affinity zinc transporter; gene is downregulated in azole-resistant strain                                                                                                                                        | YLR130C   | Yes | Yes |
| CAGL0E01419g | Putative aspartic protease; predicted GPI-anchor; member of a YPS gene cluster that is required for virulence in mice; induced in response to low pH and high temperature                                                       | YLR120C   | Yes | Yes |
| CAGL0E01749g | Putative aspartic protease; member of a YPS gene cluster that is required for virulence in mice; induced in response to low pH and high temperature                                                                             | YLR120C   | No  | Yes |
| CAGL0E01859g | Putative aspartic protease; predicted GPI-anchor; member of a YPS gene cluster that is required for virulence in mice; induced in response to low pH and high temperature                                                       | YLR120C   | Yes | Yes |
| CAGL0E01969g | Ortholog(s) have inorganic cation transmembrane transporter activity, solute:hydrogen symporter activity                                                                                                                        | YOL122C   | No  | Yes |
| CAGL0E02651g | Has domain(s) with predicted identical protein binding, serine-type endopeptidase activity and role in negative regulation of catalytic activity, proteolysis                                                                   | YOR003W   | No  | No  |
| CAGL0E03630g | Ortholog(s) have RNA binding activity and role in negative regulation of conjugation with cellular fusion, premeiotic DNA replication, reciprocal meiotic recombination, sporulation resulting in formation of a cellular spore | YHL024W   | No  | Yes |
| CAGL0E03740g | No Description Available                                                                                                                                                                                                        | YHL026C   | Yes | No  |
| CAGL0E04004g | Ortholog(s) have L-methionine transmembrane transporter activity and role in amino acid transport                                                                                                                               | YHL036W   | Yes | No  |
| CAGL0E04548g | Ortholog(s) have mitochondrion localization                                                                                                                                                                                     | YOR020W-A | No  | Yes |
| CAGL0E05148g | Ortholog(s) have alpha-mannosidase activity, role in oligosaccharide catabolic process and cytosol, fungal-type vacuole membrane localization                                                                                   | YGL156W   | No  | No  |
| CAGL0E05588g | Ortholog(s) have DNA-directed DNA polymerase activity, deoxycytidyl transferase activity and role in error-free translesion synthesis, error-prone translesion synthesis                                                        | YOR346W   | No  | No  |
| CAGL0E05610g | Ortholog(s) have role in cellular response to nitrogen starvation, negative regulation of G0 to G1 transition and cytosol localization                                                                                          | YAL038W   | Yes | No  |
| CAGL0E05808g | Bifunctional enzyme of thiamine biosynthesis, with thiamine-phosphate pyrophosphorylase and 4-methyl-5-beta-hydroxyethylthiazole kinase activities; active as a homohexamers                                                    | YPL214C   | No  | No  |
| CAGL0E06072g | Ortholog(s) have cytoplasm localization                                                                                                                                                                                         | YPL229W   | No  | No  |
| CAGL0E06116g | Has domain(s) with predicted nucleic acid binding activity                                                                                                                                                                      | YPL230W   | No  | Yes |

|              |                                                                                                                                                                                                                                          |         |     |     |
|--------------|------------------------------------------------------------------------------------------------------------------------------------------------------------------------------------------------------------------------------------------|---------|-----|-----|
| CAGL0E06292g | Has domain(s) with predicted GTP binding, GTPase activity, role in GTP catabolic process, protein transport, signal transduction, small GTPase mediated signal transduction and intracellular, membrane localization                     | YHR022C | No  | Yes |
| CAGL0E06666g | Epithelial adhesion protein; predicted GPI-anchor; adhesin-like protein                                                                                                                                                                  | YAR050W | No  | Yes |
| CAGL0F00187g | Ortholog(s) have copper ion transmembrane transporter activity, iron ion transmembrane transporter activity                                                                                                                              | YMR319C | No  | No  |
| CAGL0F00605g | Aldohexose specific glucokinase                                                                                                                                                                                                          | YDR516C | Yes | Yes |
| CAGL0F01111g | Ortholog(s) have role in inositol metabolic process and cytosol, nuclear envelope localization                                                                                                                                           | YOL032W | Yes | No  |
| CAGL0F01793g | Delta 5,6 sterol desaturase; C-5 sterol desaturase; predicted transmembrane domain and endoplasmic reticulum (ER) binding motif; gene used for molecular typing of C. glabrata strain isolates                                           | YLR056W | No  | Yes |
| CAGL0F01947g | Ortholog(s) have microtubule binding activity                                                                                                                                                                                            | YPL017C | No  | Yes |
| CAGL0F02101g | No Description Available                                                                                                                                                                                                                 | YFL007W | No  | No  |
| CAGL0F02167g | Ortholog(s) have DNA binding activity, role in reciprocal meiotic recombination and nuclear chromosome localization                                                                                                                      | YFL003C | No  | No  |
| CAGL0F02519g | Has domain(s) with predicted DNA binding, sequence-specific DNA binding RNA polymerase II transcription factor activity, zinc ion binding activity and role in regulation of transcription, DNA-dependent, transcription, DNA-dependent  | YJL206C | No  | Yes |
| CAGL0F03003g | Ortholog(s) have osmosensor activity and role in (1->3)-beta-D-glucan biosynthetic process, cellular bud site selection, fungal-type cell wall organization, hyperosmotic response, osmosensory signaling pathway via Sho1 osmosensor    | YDR420W | Yes | Yes |
| CAGL0F03267g | Ortholog(s) have mitochondrion, ribosome localization                                                                                                                                                                                    | YHR080C | Yes | Yes |
| CAGL0F03399g | Ortholog(s) have fatty acid alpha-hydroxylase activity, role in cellular response to cadmium ion, detoxification of cadmium ion, mannosyl-inositol phosphorylceramide metabolic process and endoplasmic reticulum, membrane localization | YMR272C | Yes | Yes |
| CAGL0F03641g | Has domain(s) with predicted membrane localization                                                                                                                                                                                       | YML018C | No  | No  |
| CAGL0F03707g | Ortholog(s) have protein kinase activity, role in cellular ion homeostasis, protein phosphorylation and cytoplasm localization                                                                                                           | YOR267C | No  | No  |
| CAGL0F04609g | Ortholog(s) have ubiquitin binding activity, role in endocytosis, endoplasmic reticulum unfolded protein response and actin cortical patch, cellular bud neck, cellular bud tip, mating projection tip localization                      | YBL047C | No  | Yes |
| CAGL0F04631g | No Description Available                                                                                                                                                                                                                 | YBL049W | No  | No  |
| CAGL0F04829g | Ortholog(s) have role in negative regulation of Arp2/3 complex-mediated actin nucleation and actin cortical patch, nucleus localization                                                                                                  | YPR154W | Yes | Yes |
| CAGL0F04895g | Ortholog(s) have glycogen phosphorylase activity, role in glycogen catabolic process, response to heat and cell surface, cytoplasm, hyphal cell wall localization                                                                        | YPR160W | Yes | Yes |
| CAGL0F04917g | Putative regulatory subunit for protein phosphatase; gene is upregulated in azole-resistant strain                                                                                                                                       | YOR178C | No  | Yes |
| CAGL0F08041g | Putative phosphofructokinase, alpha subunit; increased protein abundance in azole resistant strain                                                                                                                                       | YGR240C | No  | No  |
| CAGL0F08261g | Ortholog(s) have phosphopyruvate hydratase activity and role in glycolytic process, regulation of vacuole fusion, non-autophagic                                                                                                         | YHR174W | No  | Yes |
| CAGL0F09273g | Putative adhesin-like protein                                                                                                                                                                                                            | -       | No  | -   |
| CAGL0G00858g | No Description Available                                                                                                                                                                                                                 | YLR332W | Yes | Yes |
| CAGL0G01100g | Ortholog(s) have cytosol localization                                                                                                                                                                                                    | YLR345W | No  | Yes |
| CAGL0G01474g | Ortholog(s) have role in cellular response to methylmercury and cytoplasm, nucleus localization                                                                                                                                          | YNL042W | Yes | Yes |
| CAGL0G01738g | Ortholog(s) have lipid binding activity and role in eisosome assembly, endocytosis, negative regulation of protein kinase activity, protein localization, response to heat                                                               | YGR086C | Yes | Yes |
| CAGL0G02101g | Putative omega class glutathione transferase; gene is downregulated in azole-resistant strain                                                                                                                                            | YKR076W | Yes | Yes |
| CAGL0G02563g | Has domain(s) with predicted ubiquitin thiolesterase activity and role in ubiquitin-dependent protein catabolic process                                                                                                                  | YKR098C | No  | No  |
| CAGL0G02893g | Ortholog(s) have NADH kinase activity, role in NADP biosynthetic process, cellular response to oxidative stress and mitochondrial matrix localization                                                                                    | YPL188W | No  | No  |
| CAGL0G02937g | Ortholog(s) have pyruvate decarboxylase activity and role in L-phenylalanine catabolic process, aromatic amino acid family catabolic process to alcohol via Ehrlich pathway, ethanol metabolic process, tryptophan catabolic process     | YGR087C | No  | Yes |
| CAGL0G03179g | Has domain(s) with predicted phospholipid binding activity                                                                                                                                                                               | YGR097W | No  | Yes |
| CAGL0G03267g | Ortholog(s) have role in protein targeting to membrane and cytoplasm localization                                                                                                                                                        | YER101C | No  | Yes |
| CAGL0G03531g | Ortholog(s) have mitochondrion localization                                                                                                                                                                                              | YER115C | No  | No  |

|              |                                                                                                                                                                                                                      |           |     |     |
|--------------|----------------------------------------------------------------------------------------------------------------------------------------------------------------------------------------------------------------------|-----------|-----|-----|
| CAGL0G03795g | Heat shock protein of the HSP70 family                                                                                                                                                                               | YLL024C   | No  | No  |
| CAGL0G04081g | Ortholog(s) have Golgi apparatus, cell division site, cell tip, endoplasmic reticulum localization                                                                                                                   | YLR004C   | Yes | Yes |
| CAGL0G05093g | Ortholog(s) have mitochondrion localization                                                                                                                                                                          | YDR061W   | No  | No  |
| CAGL0G05269g | Putative mitochondrial protein; gene is downregulated in azole-resistant strain                                                                                                                                      | YDR070C   | No  | No  |
| CAGL0G05632g | Ortholog(s) have cytoplasm localization                                                                                                                                                                              | YDL218W   | No  | No  |
| CAGL0G05698g | Ortholog(s) have glutamate dehydrogenase (NAD+) activity, role in nitrogen compound metabolic process and cytosol, mitochondrion localization                                                                        | YDL215C   | No  | Yes |
| CAGL0G05962g | Ortholog(s) have endoplasmic reticulum localization                                                                                                                                                                  | YHR140W   | Yes | Yes |
| CAGL0G06050g | No Description Available                                                                                                                                                                                             | -         | No  | -   |
| CAGL0G06182g | No Description Available                                                                                                                                                                                             | YHR131C   | No  | No  |
| CAGL0G06798g | No Description Available                                                                                                                                                                                             | YJR005C-A | No  | No  |
| CAGL0G08624g | Drug.H+ antiporter of the Major Facilitator Superfamily, confers imidazole drug resistance, involved in quinidine/multidrug efflux; gene is activated by Pdr1p; upregulated in azole-resistant strain                | YIL120W   | Yes | No  |
| CAGL0G08866g | Ortholog(s) have DNA replication origin binding, RNA polymerase II transcription factor binding, RNA polymerase II transcription factor binding transcription factor activity                                        | YNL068C   | Yes | No  |
| CAGL0G08888g | Ortholog(s) have role in maintenance of rDNA, meiotic chromosome segregation, recombinational repair and Shu complex, cytoplasm, nucleus localization                                                                | YIL132C   | No  | No  |
| CAGL0G09295g | Ortholog(s) have cytoplasm localization                                                                                                                                                                              | YGR196C   | No  | No  |
| CAGL0G09515g | Ortholog(s) have glucan exo-1,3-beta-glucosidase activity, role in ascospore formation and ascospore wall localization                                                                                               | YOR190W   | No  | Yes |
| CAGL0G09603g | Putative protein; gene is upregulated in azole-resistant strain                                                                                                                                                      | -         | No  | -   |
| CAGL0G09977g | Ortholog(s) have 4-alpha-glucanotransferase activity, amylo-alpha-1,6-glucosidase activity, role in glycogen catabolic process and mitochondrion localization                                                        | YPR184W   | Yes | Yes |
| CAGL0G10219g | Adhesin-like protein with 5 tandem repeats; predicted GPI-anchor; similarity to S. cerevisiae flocculins, cell wall proteins that mediate adhesion                                                                   | -         | Yes | -   |
| CAGL0H00110g | Adhesin-like protein with internal repeats; predicted GPI-anchor; likely a C-terminal fragment of a single ORF with CAGL0H00132g                                                                                     | -         | Yes | -   |
| CAGL0H00418g | No Description Available                                                                                                                                                                                             | YER175C   | No  | Yes |
| CAGL0H00704g | Ortholog(s) have fungal-type vacuole membrane localization                                                                                                                                                           | YMR195W   | Yes | Yes |
| CAGL0H01177g | Ortholog(s) have diacylglycerol diphosphate phosphatase activity, phosphatidate phosphatase activity and role in farnesol biosynthetic process, phospholipid metabolic process                                       | YDR284C   | No  | No  |
| CAGL0H01287g | Ortholog(s) have mRNA 5'-UTR binding, translation repressor activity, nucleic acid binding activity                                                                                                                  | YDR293C   | Yes | Yes |
| CAGL0H02519g | Ortholog(s) have cytoplasm localization                                                                                                                                                                              | YMR253C   | Yes | No  |
| CAGL0H02541g | Ortholog(s) have mitochondrion localization                                                                                                                                                                          | YMR252C   | No  | No  |
| CAGL0H02563g | Predicted GPI-linked protein                                                                                                                                                                                         | YOL052C-A | Yes | No  |
| CAGL0H02695g | Ortholog(s) have glycogenin glucosyltransferase activity and role in glycogen biosynthetic process                                                                                                                   | YKR058W   | Yes | No  |
| CAGL0H02893g | Ortholog(s) have mitochondrion localization                                                                                                                                                                          | YJL070C   | No  | No  |
| CAGL0H03707g | Ortholog(s) have misfolded protein binding activity and role in misfolded protein transport, nucleus-associated proteasomal ubiquitin-dependent protein catabolic process, protein folding, translational initiation | YNL007C   | Yes | No  |
| CAGL0H03971g | Ortholog(s) have membrane raft, mitochondrion, plasma membrane localization                                                                                                                                          | YCR004C   | No  | Yes |
| CAGL0H04037g | Ortholog(s) have heat shock protein binding activity, role in glycogen metabolic process, meiosis, mitotic spindle assembly checkpoint, response to heat and protein phosphatase type 1 complex localization         | YOR178C   | No  | Yes |
| CAGL0H04213g | Ortholog(s) have sequence-specific DNA binding activity and nucleus localization                                                                                                                                     | YML081W   | No  | No  |
| CAGL0H04279g | Copper-binding metallothionein, involved in sequestration of metal ions; inducible by copper and silver; present in multiple (3-9) tandemly arranged copies in various strains                                       | -         | Yes | -   |
| CAGL0H04851g | Ortholog(s) have 4-nitrophenylphosphatase activity, protein serine/threonine phosphatase activity and role in cellular protein localization, cellular sodium ion homeostasis, protein dephosphorylation              | YML016C   | No  | No  |
| CAGL0H07469g | Putative adhesin-like protein                                                                                                                                                                                        | YBR157C   | No  | No  |
| CAGL0H07997g | Protein involved in cell wall beta 1,6-glucan synthesis, similar to Kre9p,                                                                                                                                           | YDL049C   | No  | Yes |
| CAGL0H08195g | Ortholog(s) have ATPase inhibitor activity, Hsp70 protein binding, Hsp90 protein binding, mRNA binding activity, role in protein folding and cytosol, nucleus localization                                           | YOR027W   | Yes | No  |
| CAGL0H08261g | No Description Available                                                                                                                                                                                             | YOR019W   | Yes | Yes |
| CAGL0H08305g | No Description Available                                                                                                                                                                                             | YDR051C   | No  | No  |

|              |                                                                                                                                                                                                                                 |         |     |     |
|--------------|---------------------------------------------------------------------------------------------------------------------------------------------------------------------------------------------------------------------------------|---------|-----|-----|
| CAGL0H08393g | Has domain(s) with predicted amino acid transmembrane transporter activity, role in amino acid transmembrane transport, amino acid transport, transmembrane transport and integral component of membrane, membrane localization | YDR046C | Yes | No  |
| CAGL0H08778g | Ortholog(s) have mRNA binding activity, role in nuclear-transcribed mRNA catabolic process, deadenylation-dependent decay and cytoplasm localization                                                                            | YPR042C | No  | Yes |
| CAGL0H08888g | Ortholog(s) have FAD transmembrane transporter activity, role in FAD transport, fungal-type cell wall biogenesis, protein folding and cellular bud neck, endoplasmic reticulum, fungal-type vacuole localization                | YPL221W | Yes | Yes |
| CAGL0H09592g | Putative GPI-linked cell wall protein                                                                                                                                                                                           | YER011W | Yes | No  |
| CAGL0H09944g | Ortholog(s) have 2-alkenal reductase [NAD(P)] activity, AU-rich element binding, NADPH:quinone reductase activity, role in cellular response to oxidative stress and cytosol, nucleus localization                              | YBR046C | No  | No  |
| CAGL0H09966g | Ortholog(s) have mitochondrion localization                                                                                                                                                                                     | YBR047W | No  | Yes |
| CAGL0H10054g | No Description Available                                                                                                                                                                                                        | YBR053C | Yes | Yes |
| CAGL0H10120g | Ortholog(s) have glucan endo-1,6-beta-glucosidase activity and cytosol, mitochondrial intermembrane space, nucleus localization                                                                                                 | YBR056W | No  | No  |
| CAGL0H10164g | Ortholog(s) have role in premeiotic DNA replication and cytoplasm localization                                                                                                                                                  | YBR057C | No  | No  |
| CAGL0H10626g | Predicted cell wall adhesion with a predicted role in adhesion; predicted GPI anchor; contains tandem repeats                                                                                                                   | -       | No  | -   |
| CAGL0I00418g | Ortholog(s) have electron carrier activity, stearyl-CoA 9-desaturase activity                                                                                                                                                   | YGL055W | No  | No  |
| CAGL0I01276g | Ortholog(s) have cytoplasm, nucleus localization                                                                                                                                                                                | YHR112C | No  | Yes |
| CAGL0I01342g | Ortholog(s) have L-allo-threonine aldolase activity, role in carnitine biosynthetic process, glycine biosynthetic process, threonine catabolic process and cytosol, nucleus localization                                        | YEL046C | No  | Yes |
| CAGL0I01980g | Putative activator of transcription; gene is upregulated in azole-resistant strain                                                                                                                                              | YNL257C | Yes | No  |
| CAGL0I02530g | Ortholog(s) have N,N-dimethylaniline monooxygenase activity, role in protein folding and endoplasmic reticulum membrane, mitochondrion localization                                                                             | YHR176W | No  | No  |
| CAGL0I03168g | No Description Available                                                                                                                                                                                                        | YEL023C | No  | No  |
| CAGL0I03872g | Has domain(s) with predicted substrate-specific transmembrane transporter activity, transmembrane transporter activity, role in transmembrane transport and integral to membrane, membrane localization                         | YDL138W | No  | No  |
| CAGL0I04180g | Metal-activated transcription factor; binds promoters of metallothionein genes; autoregulates its own expression; gene is downregulated in azole-resistant strain                                                               | YGL166W | No  | Yes |
| CAGL0I04246g | Putative transcription factor involved in sterol uptake; gene is upregulated in azole-resistant strain                                                                                                                          | YPR009W | No  | No  |
| CAGL0I05060g | Has domain(s) with predicted DNA binding, chromatin binding activity                                                                                                                                                            | YER088C | No  | Yes |
| CAGL0I05082g | Ortholog(s) have role in DNA damage checkpoint, G2/M transition of mitotic cell cycle, cellular response to biotic stimulus and cellular response to starvation, more                                                           | YBL051C | No  | No  |
| CAGL0I05148g | D-lactate ferricytochrome C oxidoreductase                                                                                                                                                                                      | YDL174C | No  | No  |
| CAGL0I05522g | Has domain(s) with predicted ubiquitin thiolesterase activity and role in ubiquitin-dependent protein catabolic process                                                                                                         | YER098W | Yes | Yes |
| CAGL0I05698g | Ortholog(s) have 6-phosphofructokinase activity, mRNA binding activity, role in glycolysis, proton transport and 6-phosphofructokinase complex, mitochondrion localization                                                      | YMR205C | Yes | Yes |
| CAGL0I05934g | Ortholog(s) have role in cellular response to water deprivation and cytoplasm localization                                                                                                                                      | YJL144W | Yes | No  |
| CAGL0I06182g | Pir protein family member, predicted GPI-anchor                                                                                                                                                                                 | YKL164C | No  | Yes |
| CAGL0I07227g | Putative isocitrate dehydrogenase                                                                                                                                                                                               | YOR136W | Yes | Yes |
| CAGL0I07249g | Putative GTPase-activating protein involved in cell wall and cytoskeleton homeostasis; gene is upregulated in azole-resistant strain                                                                                            | YOR134W | No  | Yes |
| CAGL0I07843g | Putative alcohol dehydrogenase isoenzyme III; increased protein abundance in azole resistant strain                                                                                                                             | YOL086C | Yes | Yes |
| CAGL0I07887g | Ortholog(s) have protein binding, bridging activity and role in CVT pathway, ER-associated protein catabolic process, protein complex localization, protein processing, vesicle organization                                    | YOL082W | No  | Yes |
| CAGL0I08305g | Ortholog(s) have carnitine O-acetyltransferase activity                                                                                                                                                                         | YER024W | Yes | No  |
| CAGL0I08613g | Putative plasma membrane polyamine transporter                                                                                                                                                                                  | YHL016C | No  | Yes |
| CAGL0I09009g | Ortholog(s) have histidinol-phosphatase activity, role in histidine biosynthetic process and cytosol, nucleus localization                                                                                                      | YFR025C | No  | No  |
| CAGL0I09086g | Ortholog(s) have endoplasmic reticulum, mitochondrion localization                                                                                                                                                              | YNL125C | Yes | Yes |
| CAGL0I09108g | Has domain(s) with predicted role in transmembrane transport and integral to membrane localization                                                                                                                              | YNL125C | Yes | Yes |

|              |                                                                                                                                                                                                                                           |           |     |     |
|--------------|-------------------------------------------------------------------------------------------------------------------------------------------------------------------------------------------------------------------------------------------|-----------|-----|-----|
| CAGL0I09724g | Has domain(s) with predicted role in transmembrane transport and integral component of membrane localization                                                                                                                              | YOR306C   | No  | No  |
| CAGL0I10010g | Ortholog(s) have chaperone binding activity, role in cellular response to heat, intracellular protein transport, protein folding, protein localization to nucleus and nucleus localization                                                | YPR158W   | Yes | No  |
| CAGL0I10626g | Ortholog(s) have Golgi apparatus, endoplasmic reticulum, fungal-type vacuole membrane localization                                                                                                                                        | YGR125W   | No  | No  |
| CAGL0I10648g | Putative asparagine synthetase; protein abundance increased in ace2 mutant cells                                                                                                                                                          | YPR145W   | No  | No  |
| CAGL0I10747g | Ortholog(s) have ammonium transmembrane transporter activity, role in ammonium transport, nitrogen utilization and plasma membrane localization                                                                                           | YPR138C   | Yes | Yes |
| CAGL0J00451g | Putative glyceraldehyde-3-phosphate dehydrogenase; protein differentially expressed in azole resistant strain; expression downregulated in biofilm vs planktonic cell culture                                                             | YGR192C   | No  | Yes |
| CAGL0J00715g | Has domain(s) with predicted GTP binding, GTPase activity, role in GTP catabolic process, protein transport, signal transduction, small GTPase mediated signal transduction and intracellular, membrane localization                      | YHR022C   | No  | Yes |
| CAGL0J00803g | Ortholog(s) have structural constituent of cytoskeleton activity                                                                                                                                                                          | YJL042W   | Yes | No  |
| CAGL0J01529g | Ortholog(s) have role in histone deacetylation, negative regulation of antisense RNA transcription, regulation of DNA-dependent DNA replication initiation, transcription elongation from RNA polymerase II promoter                      | YMR075W   | No  | No  |
| CAGL0J01699g | No Description Available                                                                                                                                                                                                                  | YPR010C-A | No  | Yes |
| CAGL0J01892g | Ortholog(s) have protein binding, bridging activity and role in actin cortical patch assembly, axial cellular bud site selection, bipolar cellular bud site selection, endocytosis, unidimensional cell growth                            | YIR006C   | No  | No  |
| CAGL0J02948g | Purine-cytosine transporter                                                                                                                                                                                                               | YER060W-A | Yes | No  |
| CAGL0J03256g | Ortholog(s) have protein tyrosine phosphatase activity                                                                                                                                                                                    | YER075C   | No  | Yes |
| CAGL0J04026g | No Description Available                                                                                                                                                                                                                  | YOR227W   | No  | No  |
| CAGL0J04466g | Ortholog(s) have role in fungal-type cell wall organization, protein oligomerization and Golgi apparatus, cell cortex of cell tip, cell division site, cellular bud, membrane raft, plasma membrane localization                          | YLR414C   | No  | No  |
| CAGL0J05060g | Ortholog(s) have RNA polymerase II regulatory region sequence-specific DNA binding, sequence-specific DNA binding RNA polymerase II transcription factor activity, zinc ion binding activity                                              | YJL056C   | Yes | Yes |
| CAGL0J06028g | Ortholog(s) have high affinity secondary active ammonium transmembrane transporter activity, methylammonium transmembrane transporter activity                                                                                            | YNL142W   | No  | Yes |
| CAGL0J07502g | Putative protein similar to globins with a heme-binding domain; gene is upregulated in azole-resistant strain                                                                                                                             | YNL234W   | No  | No  |
| CAGL0J08613g | Ortholog(s) have calcium activated cation channel activity, calcium channel activity, potassium channel activity, sodium channel activity, voltage-gated ion channel activity and role in cellular cation homeostasis                     | YOR087W   | No  | Yes |
| CAGL0J09262g | Ortholog(s) have role in negative regulation of ATPase activity and mitochondrion localization                                                                                                                                            | YDL130W-A | No  | Yes |
| CAGL0J10296g | Ortholog(s) have ATPase activator activity, unfolded protein binding activity, role in protein sumoylation and mitochondrion, nucleus localization                                                                                        | YNL077W   | Yes | No  |
| CAGL0J11176g | Putative adhesin-like protein                                                                                                                                                                                                             | YNL176C   | Yes | No  |
| CAGL0J11308g | Has domain(s) with predicted ATP binding, protein kinase activity, protein tyrosine kinase activity, transferase activity, transferring phosphorus-containing groups activity and role in protein phosphorylation                         | YNL183C   | No  | No  |
| CAGL0J11462g | Predicted GPI-linked cell wall protein                                                                                                                                                                                                    | YNL190W   | Yes | No  |
| CAGL0J11770g | Putative phospholipase B; predicted GPI-anchor                                                                                                                                                                                            | YOL011W   | Yes | Yes |
| CAGL0K01133g | Ortholog(s) have actin monomer binding activity, role in sequestering of actin monomers and cell division site, cell tip, mating projection tip localization                                                                              | YGR080W   | No  | No  |
| CAGL0K01155g | No Description Available                                                                                                                                                                                                                  | YGR079W   | No  | No  |
| CAGL0K01683g | Putative cytoplasmic glycerol-3-phosphate dehydrogenase (NAD+); protein abundance increased in ace2 mutant cells                                                                                                                          | YOL059W   | No  | Yes |
| CAGL0K01705g | Ortholog(s) have cytoplasm localization                                                                                                                                                                                                   | YOL056W   | No  | No  |
| CAGL0K02101g | Ortholog(s) have role in TOR signaling cascade, cellular response to chemical stimulus, cellular response to heat, cellular response to pH and chlamyospore formation, more                                                               | YGL197W   | No  | Yes |
| CAGL0K02651g | Ortholog(s) have role in chloride transport and fungal-type vacuole localization                                                                                                                                                          | YHL008C   | Yes | Yes |
| CAGL0K04257g | Ortholog(s) have ATPase activity, coupled to transmembrane movement of ions, RNA polymerase II core promoter proximal region sequence-specific DNA binding, sequence-specific DNA binding RNA polymerase II transcription factor activity | YCL005W-A | Yes | No  |

|              |                                                                                                                                                                                                                                   |         |     |     |
|--------------|-----------------------------------------------------------------------------------------------------------------------------------------------------------------------------------------------------------------------------------|---------|-----|-----|
| CAGL0K04367g | Has domain(s) with predicted amino acid transmembrane transporter activity, role in amino acid transmembrane transport and membrane localization                                                                                  | YGR055W | Yes | Yes |
| CAGL0K04675g | No Description Available                                                                                                                                                                                                          | -       | No  | -   |
| CAGL0K04719g | Ortholog(s) have mitochondrion, ribosome localization                                                                                                                                                                             | YNL208W | No  | Yes |
| CAGL0K05665g | Has domain(s) with predicted catalytic activity, pyridoxal phosphate binding activity                                                                                                                                             | YHR112C | No  | Yes |
| CAGL0K06853g | Ortholog(s) have mRNA binding activity, role in cellular response to cadmium ion, detoxification of cadmium ion and cytosol, peroxisomal matrix, peroxisomal membrane localization                                                | YBR222C | No  | Yes |
| CAGL0K07007g | Protein of unknown function                                                                                                                                                                                                       | YBR238C | No  | Yes |
| CAGL0K07183g | No Description Available                                                                                                                                                                                                          | -       | No  | -   |
| CAGL0K07205g | No Description Available                                                                                                                                                                                                          | YGL117W | No  | No  |
| CAGL0K07458g | Has domain(s) with predicted ATP binding, protein kinase activity, protein serine/threonine kinase activity, protein tyrosine kinase activity, transferase activity, transferring phosphorus-containing groups activity           | YKL126W | Yes | No  |
| CAGL0K07546g | Putative phosphate starvation inducible acid phosphatase; contains a phosphomutase-like domain; functionally complements a <i>S. cerevisiae</i> pho5 mutant; transcript abundance during phosphate starvation regulated by Pho4p  | YKL128C | No  | Yes |
| CAGL0K07590g | Putative myosin                                                                                                                                                                                                                   | YMR109W | No  | No  |
| CAGL0K07634g | Ortholog(s) have RNA polymerase II core promoter proximal region sequence-specific DNA binding transcription factor activity involved in positive regulation of transcription, more                                               | YFL021W | No  | Yes |
| CAGL0K07678g | No Description Available                                                                                                                                                                                                          | -       | No  | -   |
| CAGL0K08624g | Ortholog(s) have RNA polymerase II activating transcription factor binding, more                                                                                                                                                  | YKL109W | Yes | Yes |
| CAGL0K09372g | Ortholog(s) have RNA polymerase II core promoter proximal region sequence-specific DNA binding, more                                                                                                                              | YGL209W | Yes | Yes |
| CAGL0K10164g | Predicted GPI-linked protein; putative adhesin-like protein                                                                                                                                                                       | YER150W | Yes | No  |
| CAGL0K10428g | No Description Available                                                                                                                                                                                                          | YOL024W | No  | No  |
| CAGL0K10824g | No Description Available                                                                                                                                                                                                          | YLR149C | Yes | No  |
| CAGL0K11297g | Ortholog(s) have gluconokinase activity, role in D-gluconate metabolic process and cytosol, nucleus localization                                                                                                                  | YDR248C | No  | No  |
| CAGL0K12100g | Putative coproporphyrinogen III oxidase; protein differentially expressed in azole resistant strain                                                                                                                               | YDR044W | Yes | No  |
| CAGL0K12144g | Putative Hsp70p nucleotide exchange factor; protein abundance decreased in ace2 mutant cells                                                                                                                                      | YBR101C | No  | No  |
| CAGL0K12716g | Has domain(s) with predicted substrate-specific transmembrane transporter activity, transmembrane transporter activity, role in transmembrane transport and integral to membrane, membrane localization                           | YFL040W | No  | No  |
| CAGL0K12760g | Ortholog(s) have cytoplasm localization                                                                                                                                                                                           | YFL042C | Yes | Yes |
| CAGL0L00583g | Ortholog(s) have sequence-specific DNA binding, sequence-specific DNA binding transcription factor activity                                                                                                                       | YPL230W | No  | Yes |
| CAGL0L00957g | No Description Available                                                                                                                                                                                                          | YER048C | Yes | No  |
| CAGL0L01287g | Haloacid dehalogenase-like hydrolase                                                                                                                                                                                              | YEL038W | No  | Yes |
| CAGL0L02453g | No Description Available                                                                                                                                                                                                          | YEL007W | No  | Yes |
| CAGL0L02497g | Fructose-bisphosphate aldolase; expression downregulated in biofilm vs planktonic cell culture; protein abundance increased in ace2 mutant cells                                                                                  | YKL060C | Yes | No  |
| CAGL0L03135g | Putative phospholipase D; gene is upregulated in azole-resistant strain                                                                                                                                                           | YKR031C | Yes | No  |
| CAGL0L03157g | Ortholog(s) have sequence-specific DNA binding, sequence-specific DNA binding RNA polymerase II transcription factor activity                                                                                                     | YKR034W | Yes | No  |
| CAGL0L03267g | Ortholog(s) have L-proline transmembrane transporter activity, polyamine transmembrane transporter activity and role in amino acid transport, polyamine transport, regulation of nitrogen utilization                             | YKR039W | Yes | No  |
| CAGL0L03696g | Has domain(s) with predicted role in transmembrane transport and integral to membrane localization                                                                                                                                | YOR092W | No  | No  |
| CAGL0L03916g | Has domain(s) with predicted nucleic acid binding activity                                                                                                                                                                        | YOR113W | No  | No  |
| CAGL0L04598g | Ortholog(s) have RNA 7-methylguanosine cap binding, m7G(5')pppN diphosphatase activity, role in deadenylation-dependent decapping of nuclear-transcribed mRNA and cytoplasmic mRNA processing body, cytosol, nucleus localization | YOR173W | Yes | No  |
| CAGL0L05016g | Ortholog(s) have Sin3-type complex localization                                                                                                                                                                                   | YMR053C | No  | No  |
| CAGL0L05236g | Malate dehydrogenase                                                                                                                                                                                                              | YKL085W | Yes | No  |
| CAGL0L05654g | Ortholog(s) have chloride transmembrane transporter activity, potassium ion transmembrane transporter activity                                                                                                                    | YKR050W | Yes | No  |

|              |                                                                                                                                                                                                                                      |           |     |     |
|--------------|--------------------------------------------------------------------------------------------------------------------------------------------------------------------------------------------------------------------------------------|-----------|-----|-----|
| CAGL0L05786g | Ortholog(s) have sequence-specific DNA binding activity                                                                                                                                                                              | YPR013C   | No  | No  |
| CAGL0L06006g | Ortholog(s) have protein serine/threonine kinase activity                                                                                                                                                                            | YGL180W   | No  | No  |
| CAGL0L06248g | Ortholog(s) have cytoplasm, nucleus localization                                                                                                                                                                                     | YBR085C-A | Yes | Yes |
| CAGL0L06424g | Predicted GPI-linked adhesin-like protein                                                                                                                                                                                            | YLR110C   | Yes | No  |
| CAGL0L06864g | Putative protein related to ECM3; gene is downregulated in azole-resistant strain                                                                                                                                                    | YMR140W   | No  | No  |
| CAGL0L07722g | Putative 3-phosphoglycerate kinase; protein differentially expressed in azole resistant strain; protein abundance increased in ace2 mutant cells                                                                                     | YCR012W   | Yes | No  |
| CAGL0L07744g | Ortholog(s) have endoplasmic reticulum localization                                                                                                                                                                                  | YCR011C   | Yes | No  |
| CAGL0L07810g | Ortholog(s) have protein kinase activity                                                                                                                                                                                             | YCR008W   | No  | No  |
| CAGL0L08008g | No Description Available                                                                                                                                                                                                             | YEL017C-A | No  | Yes |
| CAGL0L08030g | Ortholog(s) have asparagine-tRNA ligase activity, role in mitochondrial asparaginyl-tRNA aminoacylation and mitochondrion localization                                                                                               | YCR024C   | No  | No  |
| CAGL0L08074g | No Description Available                                                                                                                                                                                                             | YCR030C   | No  | Yes |
| CAGL0L09251g | Ortholog(s) have role in positive regulation of transcription from RNA polymerase II promoter, response to salt stress and cytoplasm localization                                                                                    | YPR005C   | Yes | No  |
| CAGL0L09273g | Ortholog(s) have methylisocitrate lyase activity, role in propionate catabolic process, 2-methylcitrate cycle and mitochondrial matrix localization                                                                                  | YPR006C   | No  | Yes |
| CAGL0L09691g | Ortholog(s) have RNA polymerase II core promoter proximal region sequence-specific DNA binding, more                                                                                                                                 | YKL015W   | Yes | No  |
| CAGL0L09933g | No Description Available                                                                                                                                                                                                             | YOR042W   | No  | No  |
| CAGL0L10142g | Putative sphingolipid flippase; gene is upregulated in azole-resistant strain                                                                                                                                                        | YOR049C   | Yes | No  |
| CAGL0L10582g | Ortholog(s) have cytoplasm localization                                                                                                                                                                                              | YMR196W   | Yes | Yes |
| CAGL0L10758g | Putative 6-phosphofructokinase, beta subunit; protein abundance increased in ace2 mutant cells                                                                                                                                       | YMR205C   | No  | Yes |
| CAGL0L10912g | Ortholog(s) have spermidine transmembrane transporter activity, spermine transmembrane transporter activity, role in spermidine transport, spermine transport and fungal-type vacuole membrane, plasma membrane localization         | YOR273C   | No  | Yes |
| CAGL0L11154g | Ortholog(s) have lysophospholipase activity, role in phosphatidylcholine catabolic process, regulation of phospholipid biosynthetic process and endoplasmic reticulum localization                                                   | YML059C   | No  | No  |
| CAGL0L11440g | Ortholog(s) have lipid binding activity and role in endoplasmic reticulum membrane organization, regulation of phosphatidylinositol dephosphorylation                                                                                | YML072C   | No  | No  |
| CAGL0L11990g | Ortholog(s) have disulfide oxidoreductase activity, role in actin cytoskeleton organization, cellular iron ion homeostasis, cellular response to oxidative stress and nucleus localization                                           | YER174C   | Yes | No  |
| CAGL0L12012g | Ortholog(s) have trans-aconitate 3-methyltransferase activity and cytosol localization                                                                                                                                               | YER175C   | No  | Yes |
| CAGL0L12056g | No Description Available                                                                                                                                                                                                             | YER177W   | No  | Yes |
| CAGL0L12892g | Ortholog(s) have role in actin cytoskeleton organization, inositol lipid-mediated signaling, vacuole organization and plasma membrane localization                                                                                   | YKL051W   | No  | No  |
| CAGL0M00550g | Ortholog(s) have cytosol, nucleus localization                                                                                                                                                                                       | YJR130C   | No  | No  |
| CAGL0M00748g | Putative integral membrane protein required for high-affinity Ca <sup>2+</sup> influx                                                                                                                                                | YLR443W   | No  | No  |
| CAGL0M01166g | Ortholog(s) have ferrous iron binding activity, role in mitochondrial genome maintenance, thiamine biosynthetic process, thiazole biosynthetic process and cytosol, nucleus localization                                             | YGR144W   | No  | Yes |
| CAGL0M02167g | No Description Available                                                                                                                                                                                                             | YPL156C   | Yes | Yes |
| CAGL0M02915g | Ortholog(s) have role in peroxisome degradation and peroxisome localization                                                                                                                                                          | YJL185C   | No  | No  |
| CAGL0M03135g | Ortholog(s) have cell division site, cell tip, cytosol localization                                                                                                                                                                  | YJL084C   | No  | No  |
| CAGL0M03157g | Ortholog(s) have role in autophagy, cellular response to starvation, chromatin silencing at rDNA, fungal-type cell wall organization, inositol lipid-mediated signaling and mitochondrion, pre-autophagosomal structure localization | YKR019C   | No  | No  |
| CAGL0M03179g | Ortholog(s) have cytosol, nucleus localization                                                                                                                                                                                       | YJL082W   | No  | No  |
| CAGL0M03245g | Ortholog(s) have cytosol localization                                                                                                                                                                                                | YEL020C   | No  | No  |
| CAGL0M04807g | Component of the chromatin remodelling Swi/Snf complex; involved in regulation of biofilm formation                                                                                                                                  | YOR290C   | No  | Yes |
| CAGL0M06347g | Ortholog(s) have dihydroceramidase activity, role in ceramide biosynthetic process, ceramide catabolic process and endoplasmic reticulum, fungal-type vacuole membrane localization                                                  | YPL087W   | Yes | Yes |
| CAGL0M06765g | Ortholog(s) have role in actin filament organization, endocytosis, response to stress and cytosol, nucleus localization                                                                                                              | YNL032W   | No  | No  |
| CAGL0M06963g | Ortholog(s) have role in tRNA export from nucleus and cytoplasm, nucleus localization                                                                                                                                                | YNR034W   | Yes | No  |
| CAGL0M07568g | Ortholog(s) have ubiquitin-protein ligase activity                                                                                                                                                                                   | YMR022W   | No  | No  |
| CAGL0M07612g | Ortholog(s) have polyamine oxidase activity, role in pantothenate biosynthetic process, polyamine catabolic process and cytoplasm localization                                                                                       | YMR020W   | Yes | No  |
| CAGL0M08492g | Pir protein family member, predicted GPI-anchor                                                                                                                                                                                      | YKL164C   | No  | Yes |



|              |                                                                                                                                                                                                                                              |           |     |     |
|--------------|----------------------------------------------------------------------------------------------------------------------------------------------------------------------------------------------------------------------------------------------|-----------|-----|-----|
| CAGL0M08800g | bZIP domain-containing protein                                                                                                                                                                                                               | YOR028C   | No  | Yes |
| CAGL0M08822g | Ortholog(s) have ATPase activity, misfolded protein binding activity, role in cellular response to heat, mitochondrial genome maintenance, protein refolding, protein stabilization, protein unfolding and mitochondrial matrix localization | YDR258C   | Yes | No  |
| CAGL0M09108g | Has domain(s) with predicted RNA binding, nucleic acid binding, nucleotide binding activity                                                                                                                                                  | YPR042C   | No  | Yes |
| CAGL0M09449g | No Description Available                                                                                                                                                                                                                     | YBL101C   | No  | No  |
| CAGL0M10153g | Ortholog(s) have MAP kinase kinase kinase activity, histone serine kinase activity                                                                                                                                                           | YHL007C   | No  | No  |
| CAGL0M10439g | Ortholog(s) have alpha,alpha-trehalase activity, calcium ion binding activity                                                                                                                                                                | YDR001C   | No  | Yes |
| CAGL0M10571g | Ortholog(s) have ergosterol O-acyltransferase activity, role in ergosterol metabolic process and endoplasmic reticulum localization                                                                                                          | YNR019W   | No  | Yes |
| CAGL0M11000g | No Description Available                                                                                                                                                                                                                     | YCR075W-A | Yes | No  |
| CAGL0M12947g | Mitochondria-localized protein; gene is upregulated in azole-resistant strain                                                                                                                                                                | YIL077C   | No  | No  |
| CAGL0M13651g | Ortholog(s) have serine-type carboxypeptidase activity, role in phytochelatin biosynthetic process and endoplasmic reticulum, extracellular region, fungal-type vacuole localization                                                         | YMR297W   | No  | Yes |

### Acetic acid-responsive genes regulated by ScHaa1 and CgHaa1

| ORF          | Function                                                                                                                                                                              | <i>S. cerevisiae</i><br>orthologue | <i>C. glabrata</i><br>promoter harbors<br>an HRE motif | <i>S. cerevisiae</i><br>promoter harbors<br>an HRE motif |
|--------------|---------------------------------------------------------------------------------------------------------------------------------------------------------------------------------------|------------------------------------|--------------------------------------------------------|----------------------------------------------------------|
| CAGL0C02321g | Ortholog(s) have nucleotidase activity and role in pyrimidine nucleobase metabolic process                                                                                            | YGL224C                            | No                                                     | No                                                       |
| CAGL0C02893g | Ortholog(s) have protein serine/threonine kinase activity                                                                                                                             | YOR267C                            | No                                                     | No                                                       |
| CAGL0C05071g | Ortholog(s) have hydroxymethylpyrimidine kinase activity, phosphomethylpyrimidine kinase activity, thiamine biosynthetic process, thiamine catabolic process and cytosol localization | YOL055C                            | No                                                     | Yes                                                      |
| CAGL0D03322g | Ortholog(s) have role in cellular zinc ion homeostasis and endoplasmic reticulum localization                                                                                         | YLR023C                            | Yes                                                    | No                                                       |
| CAGL0E00803g | Putative small cytosolic stress-induced chaperone; gene is upregulated in azole-resistant strain                                                                                      | YDR171W                            | Yes                                                    | Yes                                                      |
| CAGL0E01529g | Ortholog(s) have role in fructose 2,6-bisphosphate metabolic process, regulation of glycolysis                                                                                        | YOL136C                            | Yes                                                    | No                                                       |
| CAGL0E02035g | Ortholog(s) have fungal-type vacuole membrane localization                                                                                                                            | YOL119C                            | Yes                                                    | Yes                                                      |
| CAGL0E02321g | Putative phospholipase B; predicted GPI-anchor                                                                                                                                        | YOL011W                            | No                                                     | Yes                                                      |
| CAGL0E03025g | No Description Available                                                                                                                                                              | YGR146C                            | Yes                                                    | No                                                       |
| CAGL0E04774g | Ortholog(s) have cytoplasm localization                                                                                                                                               | YLR225C                            | Yes                                                    | Yes                                                      |
| CAGL0E05566g | Has domain(s) with predicted protein dimerization activity                                                                                                                            | YOR344C                            | No                                                     | No                                                       |
| CAGL0E06380g | Ortholog(s) have ATP-dependent NAD(P)H-hydrate dehydratase activity, role in nicotinamide nucleotide metabolic process and cytosol localization                                       | YKL151C                            | No                                                     | Yes                                                      |
| CAGL0F04521g | No Description Available                                                                                                                                                              | YBL043W                            | No                                                     | Yes                                                      |
| CAGL0F05687g | Ortholog(s) have cytoplasm, ribosome localization                                                                                                                                     | YDR186C                            | No                                                     | Yes                                                      |
| CAGL0F07117g | Putative subunit of the heterotrimeric G protein; gene is upregulated in azole-resistant strain                                                                                       | YGL121C                            | No                                                     | No                                                       |
| CAGL0F08217g | Ortholog(s) have cytoplasmic stress granule localization                                                                                                                              | YGR250C                            | No                                                     | No                                                       |
| CAGL0F08745g | Ortholog(s) have cytoplasm, nucleus, ribosome localization                                                                                                                            | YLR327C                            | Yes                                                    | Yes                                                      |
| CAGL0F09207g | Has domain(s) with predicted branched-chain-amino-acid transaminase activity, catalytic activity and role in branched-chain amino acid metabolic process, metabolic process           | YJR148W                            | No                                                     | No                                                       |
| CAGL0L10362g | Ortholog(s) have cytoplasm, nucleus localization                                                                                                                                      | YKR075C                            | No                                                     | Yes                                                      |
| CAGL0G03289g | Heat shock protein of the HSP70 family                                                                                                                                                | YER103W                            | Yes                                                    | No                                                       |
| CAGL0G03883g | Ortholog(s) have ADP binding, ATP binding, ATPase activity, coupled, chaperone binding, misfolded protein binding, unfolded protein binding activity                                  | YLL026W                            | No                                                     | Yes                                                      |
| CAGL0G05357g | Ortholog(s) have NADHX epimerase activity, role in nicotinamide nucleotide metabolic process and cytosol, mitochondrion, nucleus localization                                         | YNL200C                            | No                                                     | No                                                       |
| CAGL0G08844g | Ortholog(s) have sequence-specific DNA binding activity                                                                                                                               | YIL130W                            | No                                                     | No                                                       |
| CAGL0H01375g | Predicted sphinganine hydroxylase with role in sphingolipid biosynthesis; mutants show reduced sensitivity to caspofungin and increased sensitivity to micafungin                     | YDR297W                            | Yes                                                    | No                                                       |
| CAGL0H02101g | Ortholog(s) have role in RNA metabolic process and cytoplasm, nucleus localization                                                                                                    | YHR087W                            | No                                                     | No                                                       |
| CAGL0H02387g | Putative trehalose-6-phosphate synthase/phosphatase subunit; gene is upregulated in azole-resistant strain                                                                            | YML100W                            | Yes                                                    | Yes                                                      |
| CAGL0H02585g | Ortholog(s) have glutamate decarboxylase activity, role in cellular response to oxidative stress, glutamate catabolic process and cytoplasm localization                              | YMR250W                            | Yes                                                    | No                                                       |
| CAGL0H05379g | Ortholog(s) have RNA polymerase II core promoter proximal region sequence-specific DNA binding, more                                                                                  | YPL075W                            | No                                                     | Yes                                                      |

|              |                                                                                                                                                                                              |         |     |     |
|--------------|----------------------------------------------------------------------------------------------------------------------------------------------------------------------------------------------|---------|-----|-----|
| CAGL0H10076g | Has domain(s) with predicted ion channel activity, role in ion transport and membrane localization                                                                                           | YBR054W | No  | No  |
| CAGL0I00550g | Ortholog(s) have fungal-type vacuole membrane, nucleus localization                                                                                                                          | YLR297W | No  | Yes |
| CAGL0I06644g | Putative GPI-linked cell wall protein                                                                                                                                                        | YER150W | No  | No  |
| CAGL0I09702g | Ortholog(s) have riboflavin transporter activity, role in riboflavin transport and plasma membrane localization                                                                              | YOR306C | No  | No  |
| CAGL0I10384g | Predicted polyamine transporter of the major facilitator superfamily; required for azole resistance                                                                                          | YPR156C | No  | Yes |
| CAGL0J03080g | No Description Available                                                                                                                                                                     | YER067W | Yes | Yes |
| CAGL0J06050g | Has domain(s) with predicted role in cellular amino acid metabolic process                                                                                                                   | YNL160W | Yes | Yes |
| CAGL0J07876g | Ortholog(s) have cytoplasm, nucleus localization                                                                                                                                             | YNL254C | No  | No  |
| CAGL0J08074g | Ortholog(s) have phosphatidylinositol transporter activity                                                                                                                                   | YNL264C | No  | No  |
| CAGL0K02145g | Has domain(s) with predicted nucleic acid binding activity                                                                                                                                   | YER130C | Yes | Yes |
| CAGL0K03421g | Ortholog(s) have cytosol, nucleus localization                                                                                                                                               | YMR105C | No  | Yes |
| CAGL0K04301g | Putative mitochondrial Ser/Thr protein kinase; gene is upregulated in azole-resistant strain                                                                                                 | YGR052W | No  | No  |
| CAGL0K05357g | Ortholog(s) have glutamate-ammonia ligase activity, role in cellular response to nitrogen starvation, glutamine biosynthetic process, nitrogen utilization and cytosol, nucleus localization | YPR035W | Yes | Yes |
| CAGL0K07337g | Has domain(s) with predicted ion channel activity, role in ion transport and membrane localization                                                                                           | YCR021C | No  | Yes |
| CAGL0K12078g | Has domain(s) with predicted nucleic acid binding activity                                                                                                                                   | YDR043C | No  | Yes |
| CAGL0L08712g | Ortholog(s) have cytoplasm, nucleus localization                                                                                                                                             | YPL014W | No  | Yes |
| CAGL0L09108g | Ortholog(s) have role in propionate metabolic process and mitochondrial outer membrane localization                                                                                          | YPR002W | No  | No  |
| CAGL0L10043g | Ortholog(s) have protein kinase activator activity                                                                                                                                           | YDR277C | Yes | Yes |
| CAGL0M04763g | Ortholog(s) have role in cellular response to drug and cytosol, nucleus localization                                                                                                         | YOR289W | No  | No  |
| CAGL0M06897g | Ortholog(s) have cytoplasm localization                                                                                                                                                      | YNL024C | Yes | No  |
| CAGL0M07293g | Putative ABC transporter of weak organic acids; gene is downregulated in azole-resistant strain                                                                                              | YPL058C | No  | Yes |
| CAGL0M07634g | Ortholog(s) have sequence-specific DNA binding, sequence-specific DNA binding transcription factor activity                                                                                  | YMR016C | No  | No  |
| CAGL0M08552g | Ortholog(s) have role in cation transport, regulation of membrane potential and plasma membrane localization                                                                                 | YDR276C | Yes | No  |
